# Supplementary material
Source: PubMed Central journal article supplement (PMC8855485)

**Site-selective  $\alpha$ -C-H Functionalization of Trialkylamines via  
Reversible HAT-Catalysis**

Yangyang Shen<sup>1</sup>, Ignacio Funez-Ardoiz<sup>2</sup>, Franziska Schoenebeck,<sup>2,\*</sup> Tomislav Rovis<sup>1,\*</sup>

Correspondence to: franziska.schoenebeck@rwth-aachen.de; tr2504@columbia.edu

<sup>1</sup> *Department of Chemistry, Columbia University, New York, 10027 NY, USA.*

<sup>2</sup> *Institute of Organic Chemistry, RWTH Aachen University, 52074 Aachen, Germany.*

## Table of contents

|             |                                                                                        |            |
|-------------|----------------------------------------------------------------------------------------|------------|
| <b>I.</b>   | <b>General considerations</b>                                                          | <b>S3</b>  |
| <b>II.</b>  | <b>Optimization details and control experiments</b>                                    | <b>S4</b>  |
| <b>III.</b> | <b>Mechanistic experiments</b>                                                         | <b>S9</b>  |
| <b>IV.</b>  | <b>Computational details</b>                                                           | <b>S16</b> |
| <b>V.</b>   | <b><math>\alpha</math>-C(sp<sup>3</sup>)-H alkylation via reversible HAT catalysis</b> | <b>S64</b> |
| <b>VI.</b>  | <b>References</b>                                                                      | <b>S83</b> |
| <b>VII.</b> | <b><sup>1</sup>H, <sup>13</sup>C and <sup>19</sup>F NMR spectra</b>                    | <b>S84</b> |

## I. General consideration

Reagents: Unless otherwise noted, all reactions were carried out in reaction tubes with screw cap. Anhydrous solvents and reagents were purchased from Sigma Aldrich and used without further purification. All other reagents were purchased from commercial sources and used as received. For the pharmaceuticals received in salt form, a simple treatment with  $K_2CO_3$  (aq.) and ethyl acetate offered pure enough sample for the reactions. Purification of the product was conducted either manually on SiliCycle® SilicaFlash® P60 (230-400 mesh) silica gel or automatically via a Teledyne Isco Lumen CombiFlash using CombiFlash gold pre-packed columns. Thin layer chromatography (TLC) was performed on Silicycle 250  $\mu m$  silica gel 60 Å plates. Visualization was accomplished with UV lamp (254 nm),  $KMnO_4$  or Iodine. A Kessil blue LED (34W maximum, 24 VDC, 440 nm) was used as the light source for the photoredox catalyzed reactions. The procedures described in this section are representative. Thus, the yields may differ slightly from those given in the tables of the manuscript.

Analytical Methods:  $^1H$  NMR,  $^{13}C$  NMR and  $^{19}F$  NMR spectra are included for all new compounds.  $^1H$  NMR,  $^{13}C$  NMR and  $^{19}F$  NMR spectra were recorded on Varian 300/400 MHz or Bruker 400/500 MHz at ambient temperature. All  $^1H$  NMR spectra are reported in parts per million (ppm) downfield of TMS and were measured relative to the signals for  $CHCl_3$  (7.26 ppm). All  $^{13}C$  NMR spectra were reported in ppm relative to residual  $CHCl_3$  (77.16 ppm) and were obtained with  $^1H$  decoupling. Coupling constants,  $J$ , are reported in hertz (Hz). In the case of diastereoisomeric mixtures, isolated NMR was recorded to determine the ratio. High resolution mass spectra (HRMS) were obtained from the Columbia University Chemistry Department Mass Spectrometry Facility on a Waters XEVO G2XS QToF mass spectrometer equipped with a UPC2 SFC inlet and a LockSpray source with one of the following three probes: electrospray ionization (ESI) probe, atmospheric pressure chemical ionization (APCI) probe, or atmospheric pressure solids analysis probe (ASAP). Infrared spectra were collected on a Perkin Elmer Spectrum Two FT-IR Spectrometer. Infrared spectra were recorded on a Bruker Tensor 27. Mass spectra were recorded on a Waters LCT Premier spectrometer. Stern-Volmer luminescence quenching experiments were conducted on a Fluoromax-4 fluorometer.

## II. Optimization details and control experiments

**Table S1. Practical considerations of amine loadings**

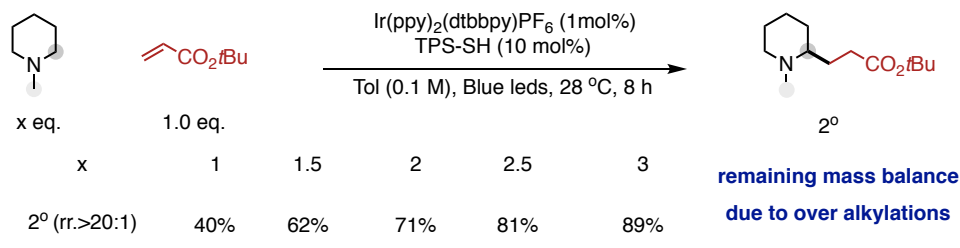

<sup>a</sup> yield and ratio are determined by GC-MS analysis with benzyl benzoate as internal standard

**Table S2. Control experiments with/without TPS-SH**

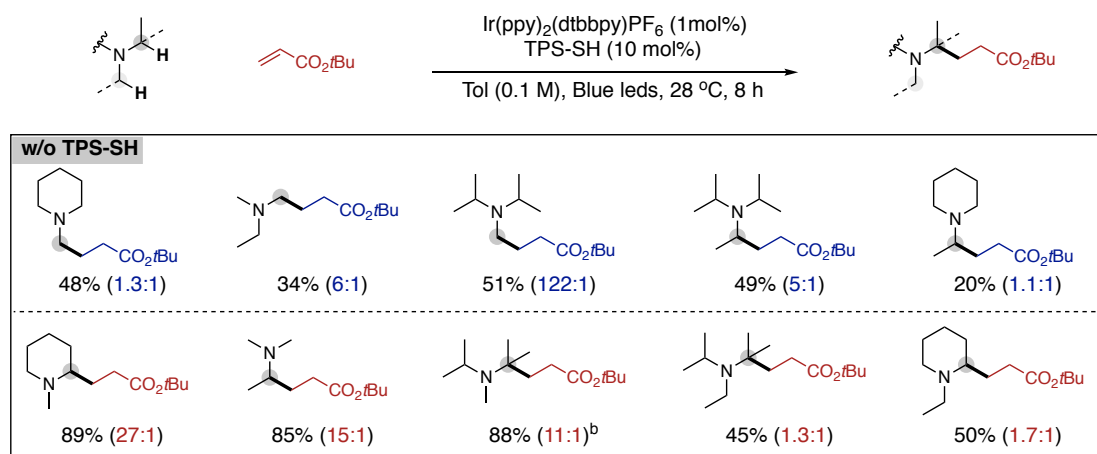

<sup>a</sup> yield and ratio are determined by GC-MS analysis with benzyl benzoate as internal standard; <sup>b</sup> *m*-Xylene was used

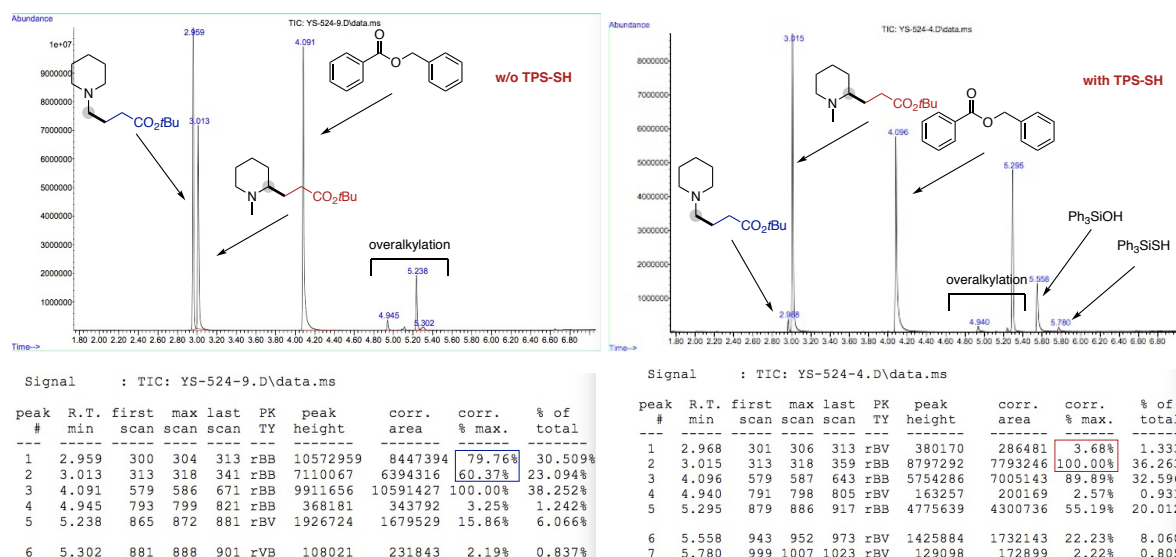



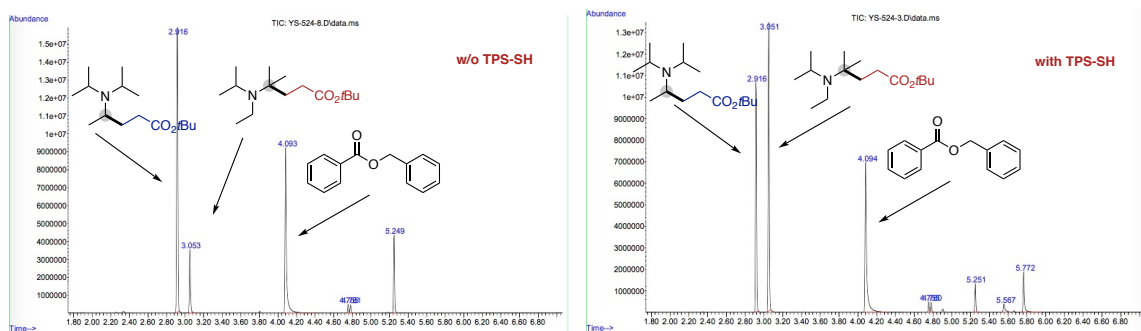

Signal : TIC: YS-524-8.D\data.ms

| peak # | R.T. min | first scan | max scan | last scan | PK TY | peak height | corr. area | corr. % max. | % of total |
|--------|----------|------------|----------|-----------|-------|-------------|------------|--------------|------------|
| 1      | 2.916    | 288        | 293      | 299       | rBB   | 15889797    | 14654632   | 100.00%      | 46.279%    |
| 2      | 3.053    | 321        | 328      | 352       | rBB   | 3528129     | 2919472    | 19.92%       | 9.220%     |
| 3      | 4.093    | 579        | 587      | 665       | rBB   | 9225513     | 10008394   | 68.30%       | 31.606%    |
| 4      | 4.755    | 747        | 752      | 755       | rBV   | 488596      | 369561     | 2.52%        | 1.167%     |
| 5      | 4.781    | 755        | 758      | 773       | rVB   | 456804      | 365813     | 2.50%        | 1.155%     |
| 6      | 5.249    | 869        | 875      | 881       | rBB   | 4315988     | 3348188    | 22.85%       | 10.573%    |

Signal : TIC: YS-524-3.D\data.ms

| peak # | R.T. min | first scan | max scan | last scan | PK TY | peak height | corr. area | corr. % max. | % of total |
|--------|----------|------------|----------|-----------|-------|-------------|------------|--------------|------------|
| 1      | 2.916    | 289        | 293      | 299       | rBB   | 10630106    | 8452810    | 76.82%       | 26.710%    |
| 2      | 3.051    | 322        | 327      | 333       | rBB   | 13429119    | 11004059   | 100.00%      | 34.771%    |
| 3      | 4.094    | 579        | 587      | 645       | rBB   | 6957237     | 8202036    | 74.54%       | 25.917%    |
| 4      | 4.755    | 747        | 752      | 755       | rBV   | 486999      | 369866     | 3.36%        | 1.169%     |
| 5      | 4.780    | 755        | 758      | 763       | rVB   | 450243      | 353539     | 3.21%        | 1.117%     |
| 6      | 5.251    | 870        | 875      | 881       | rBB   | 1318309     | 946432     | 8.60%        | 2.991%     |
| 7      | 5.567    | 945        | 973      | 973       | rBV   | 377775      | 568364     | 5.17%        | 1.796%     |
| 8      | 5.772    | 998        | 1005     | 1051      | rBB   | 1864428     | 1749969    | 15.90%       | 5.530%     |

Note: Due to overlapping peaks in the spectra,  $^1\text{H-NMR}$  analysis is unreliable as a method to determine the regioisomer ratios. We thus tentatively assign the ratios by GC-MS analysis, understanding that there are caveats with this method (efforts towards synthesis of minor isomer to correct the GC-MS results failed due to oligomer contamination). Notably, during the purification of the products, we only observe <5% or trace of minor isomers (mono-alkylation at the methyl position) when using more electron-deficient olefins (vinyl phenyl sulfone) as radical acceptor, unless otherwise noted.

**Table S3. Optimization of thiol catalyst for *N*-Me piperidine**

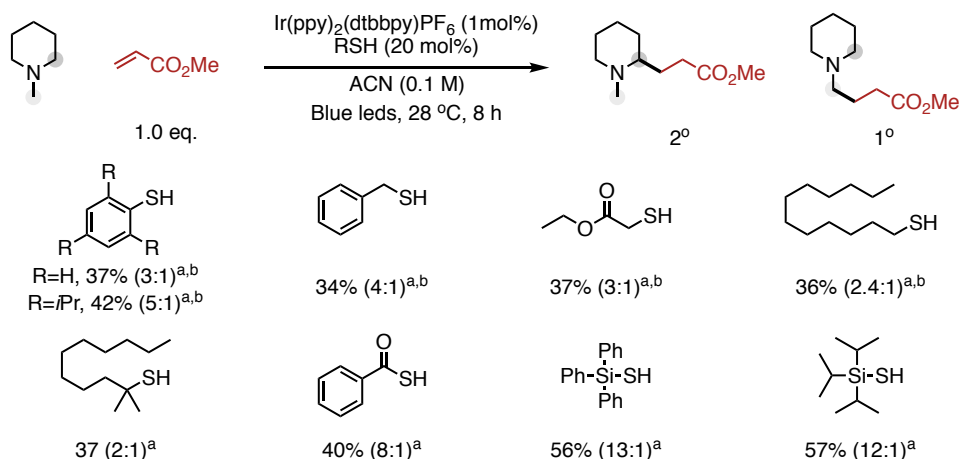

yield and ratio are determined by GC-MS analysis with benzyl benzoate as internal standard;  
<sup>a</sup> yield of 2° product, ratio of 2°:1°; <sup>b</sup> sulfa-Michael addition observed.

**Table S4. Optimization of solvent for *N*-Me piperidine**

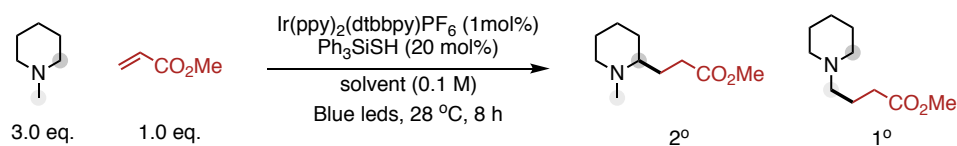

| solvent            | 2° : 1° | yield (2°) (%) | solvent | 2° : 1° | yield (2°) (%) |
|--------------------|---------|----------------|---------|---------|----------------|
| ACN                | 13      | 56             | DMF     | 13      | 77             |
| Acetone            | 13      | 70             | DMA     | 13      | 79             |
| Tol                | 17      | 72             | NMP     | 12      | 76             |
| CF <sub>3</sub> Ph | 14      | 78             | DMSO    | 12      | 72             |
| DCM                | 14      | 63             | DME     | 12      | 73             |
| DCE                | 11      | 52             | EtOAc   | 13      | 76             |

yield and ratio are determined by GC-MS analysis with benzyl benzoate as internal standard

**Table S5. Optimization of solvent for *N*, *N*-diisopropylmethylamine**

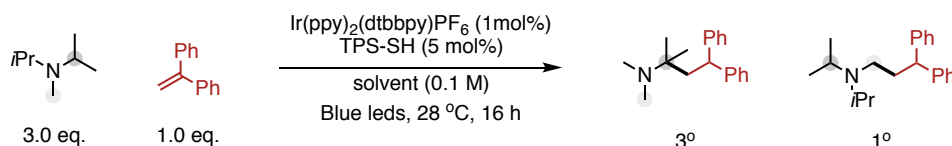

| solvent            | 3° : 1° | yield (3°) (%) | solvent           | 3° : 1°    | yield (3°) (%)        |
|--------------------|---------|----------------|-------------------|------------|-----------------------|
| ACN                | 0.7     | 23             | EtOH              | 1          | 24                    |
| Tol                | 1.7     | 38             | Et <sub>2</sub> O | 1.8        | 15                    |
| CF <sub>3</sub> Ph | 0.4     | 21             | DME               | 1.3        | 41                    |
| DMF                | 0.7     | 18             | THF               | 1.6        | 47                    |
| NMP                | 0.8     | 21             | <b>Dioxane</b>    | <b>1.8</b> | <b>54<sup>b</sup></b> |
| DMSO               | 0.5     | 12             | Diglyme           | 0.5        | 11                    |

<sup>a</sup> yield and ratio are determined by GC-MS analysis with benzyl benzoate as internal standard  
<sup>b</sup> w/o TPS-SH, only 1° product (52% yield) observed.

**Table S6. Practical consideration of alkylation of diethylcarbamazine**

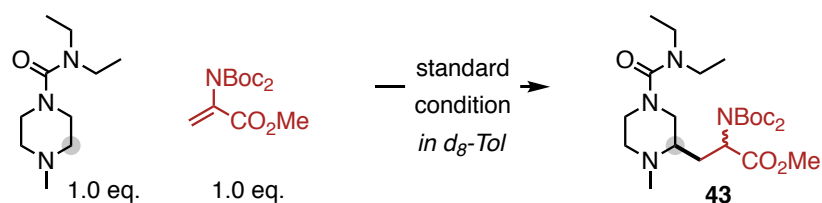

| irradiation time (h) | conversion of olefin (%) | yield of <b>43</b> (%) |
|----------------------|--------------------------|------------------------|
| 1                    | 57                       | 27                     |
| 2                    | 87                       | 31                     |
| 4                    | 100                      | 33                     |

0.2 mmol scale. 0.1 mmol of ethyl benzoate as internal standard.

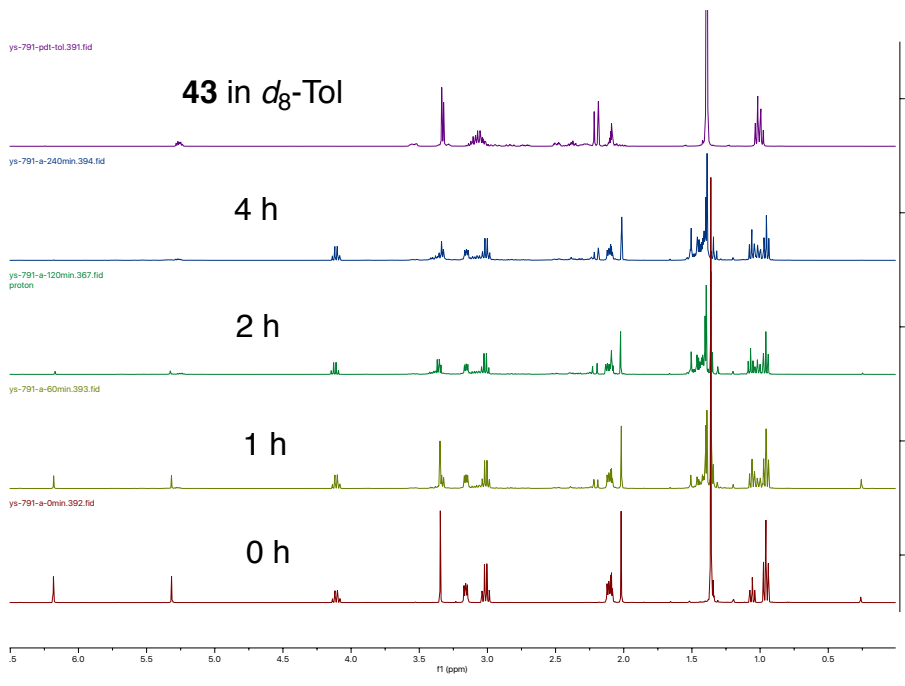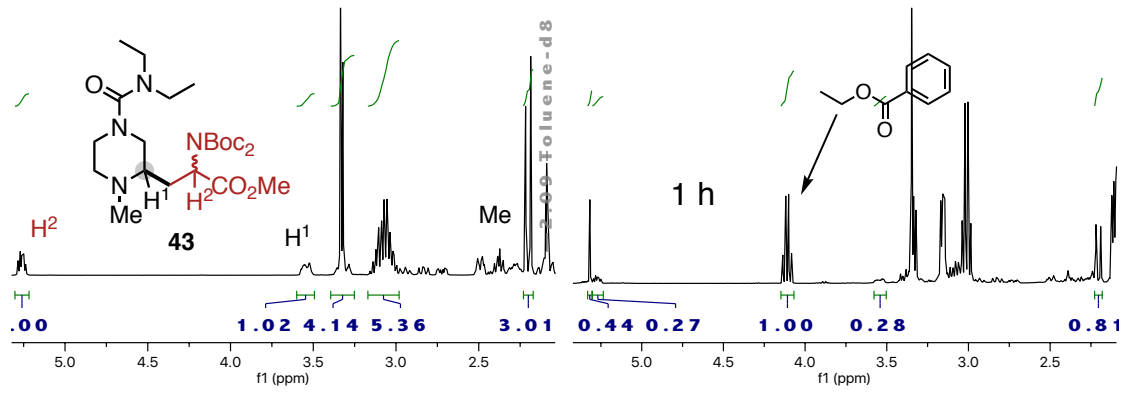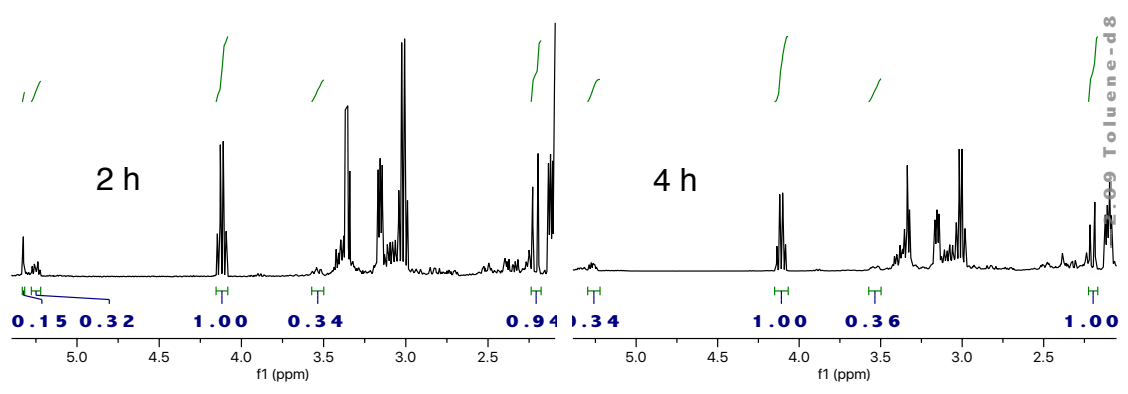

**Table S7. Practical consideration of alkylation of clomipramine**

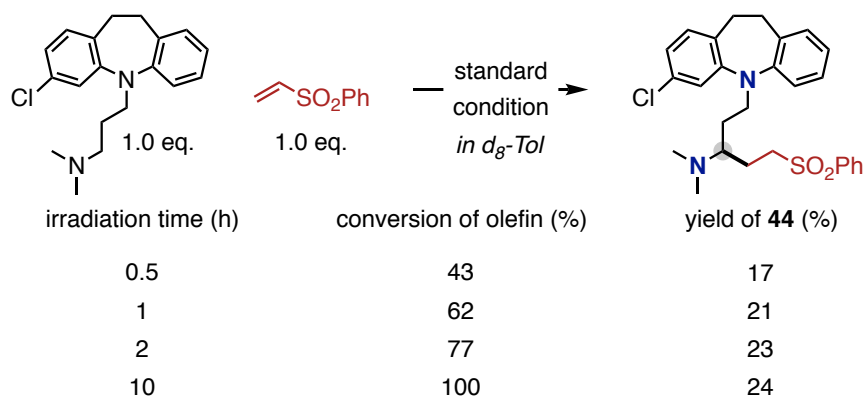

0.2 mmol scale. 0.1 mmol of ethyl benzoate as internal standard.

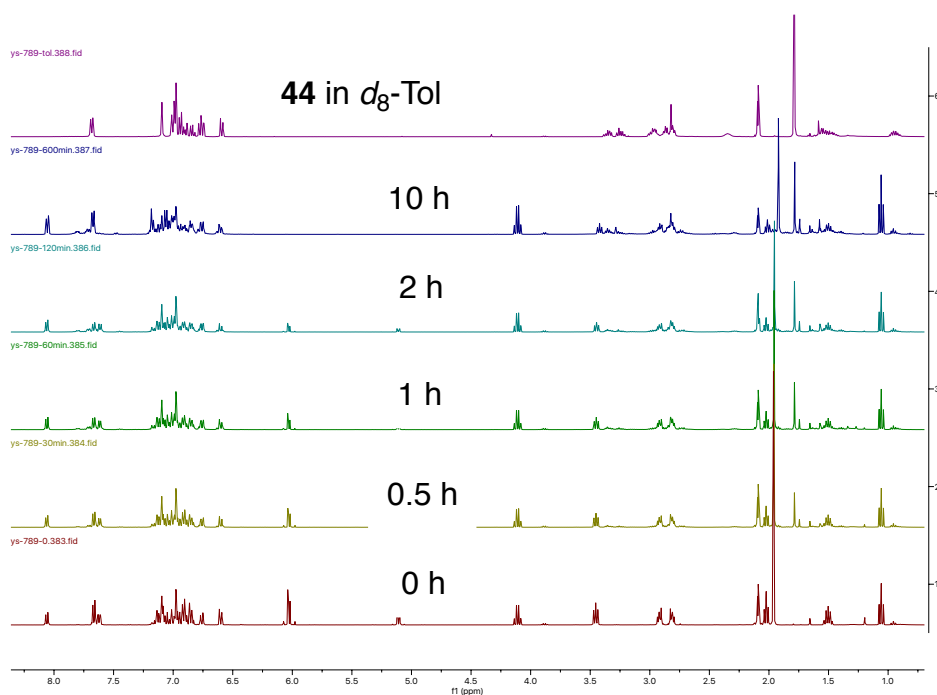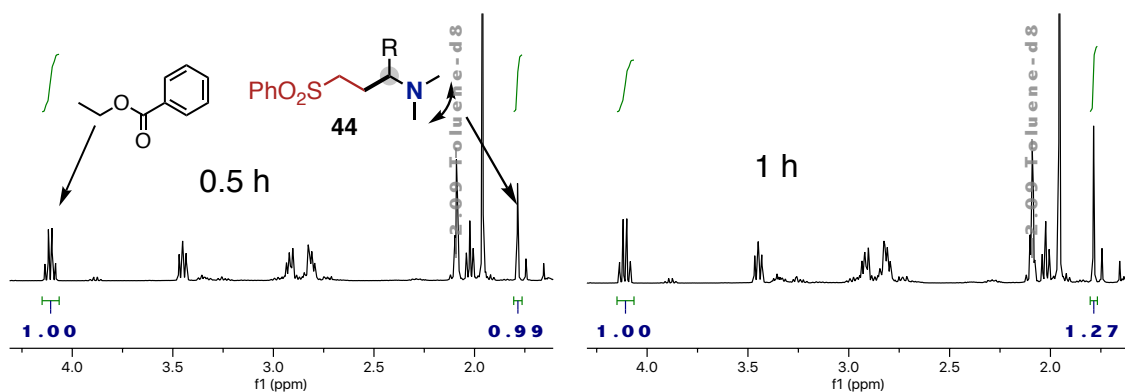

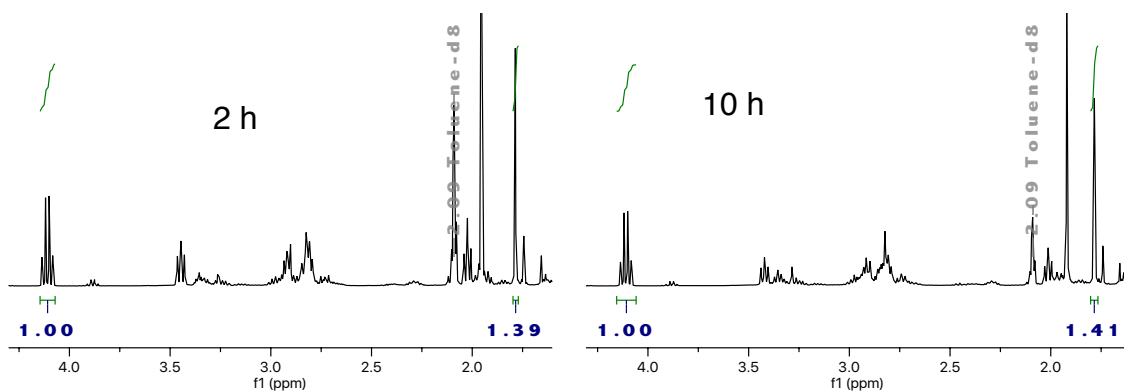

### III. Mechanistic experiments

#### On/Off experiments of standard reactions

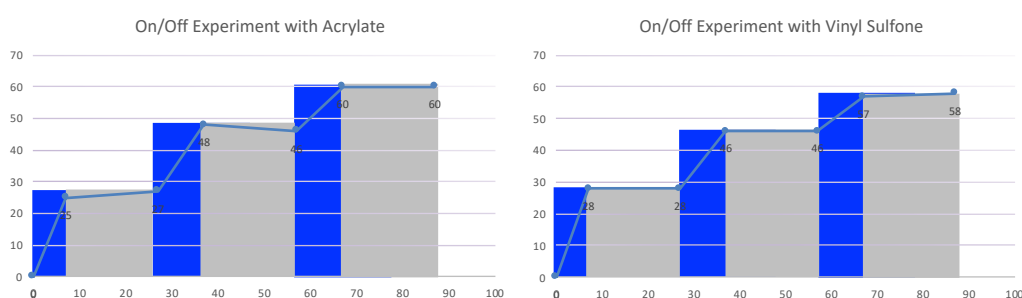

Chart 1. On/Off experiments; Y axis: Yield (%), X axis: Time (min).

#### Quenching Studies

Standard solution of  $\text{Ir}(\text{ppy})_2(\text{dtbbpy})\text{PF}_6$  in Toluene ( $5.0 \times 10^{-5}$  M) was used for the analysis.

Samples were irradiated at 480 nm and emission was measured at 580 nm.

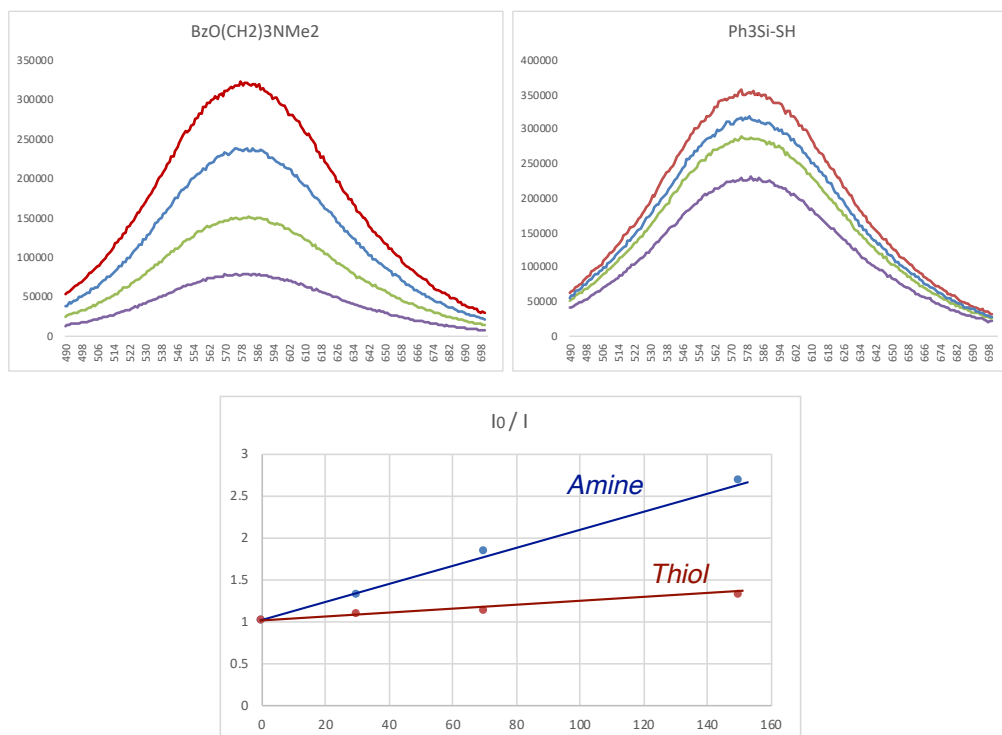

Chart 2. Quenching studies (intensity of emission at 582 nm was used).

## Quantum yield calculation

Quantum yield was calculated according to reported literature.<sup>1</sup>

The measurement of the photon flux (11 cm away from light source) at maximum intensity of a Kessil PR160 (34W maximum, 240 VDC, 440 nm) was determined by standard ferrioxalate actinometry following already reported procedures (average of 3 measurements).

Photon flux (average of 3 times) =  $4.32 \times 10^{-9}$  einstein·s<sup>-1</sup>

A cuvette was charge with standard reaction solution and then placed 11 cm away from the light source. (Under these conditions, the fraction of light absorbed by the photocatalyst was  $f = 0.965$ ) The sample was irradiated for 420 s (7 min). Product was detected with GC-MS in (18+20+21)/3% yield. The quantum yield was calculated as 23.

$$\Phi = \frac{\text{mol of Product}}{\text{flux} \times t \times f} = \frac{0.2 \times 0.2 \times 10^{-3} \text{ mol}}{4.32 \times 10^{-9} \text{ einstein} \cdot \text{s}^{-1} \times 420 \text{ s} \times 0.965} \approx 23$$

## Control studies under thermal conditions:

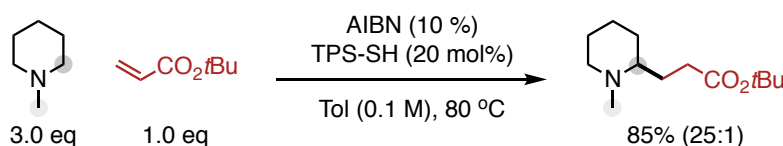

Fig. S1. Control experiment with catalytic amount of AIBN

## Deuteration studies under various conditions:

Table S8. Deuteration studies with different period of irradiation time

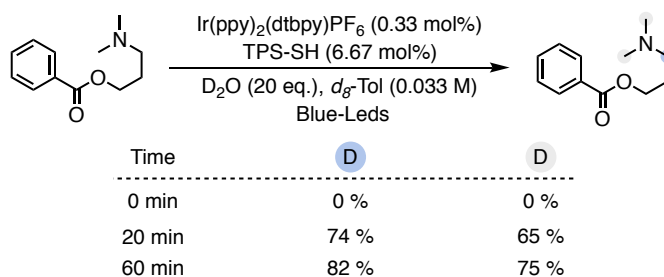

D<sub>2</sub>O (60 eq., 220 μL, 12 mmol) was added to the reaction mixture. After 10 min, the reaction was removed from the light source and TLC showed *the alkene was not fully consumed*. Then the mixture was directly purified by flash column chromatography in silica gel with CHCl<sub>3</sub>/MeOH and the results were analyzed by NMR.



D<sub>2</sub>O (60 eq., 220 μL, 12 mmol) was added to the standard reaction. As a control, D<sub>2</sub>O (60 eq., 220 μL, 12 mmol) was added to the standard reaction without TPS-SH. After indicated time, the mixture was directly purified by flash column chromatography in silica gel with CHCl<sub>3</sub>/MeOH and the results were analyzed by NMR and shown below.

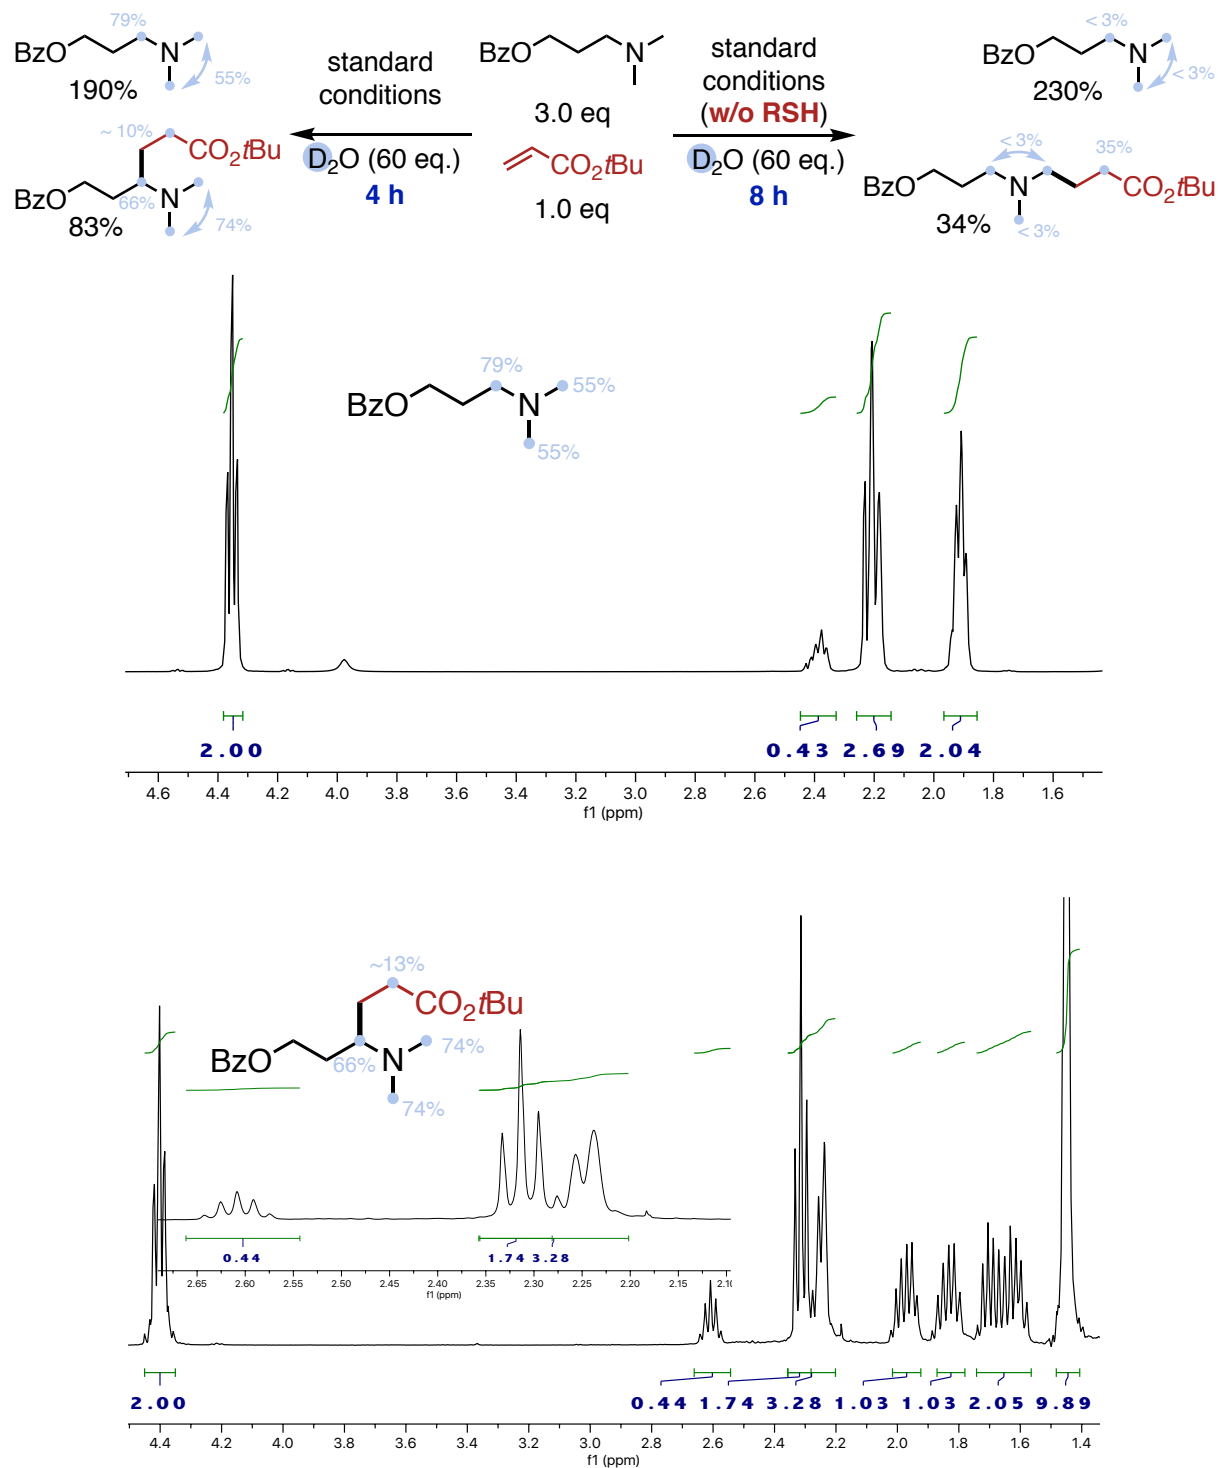



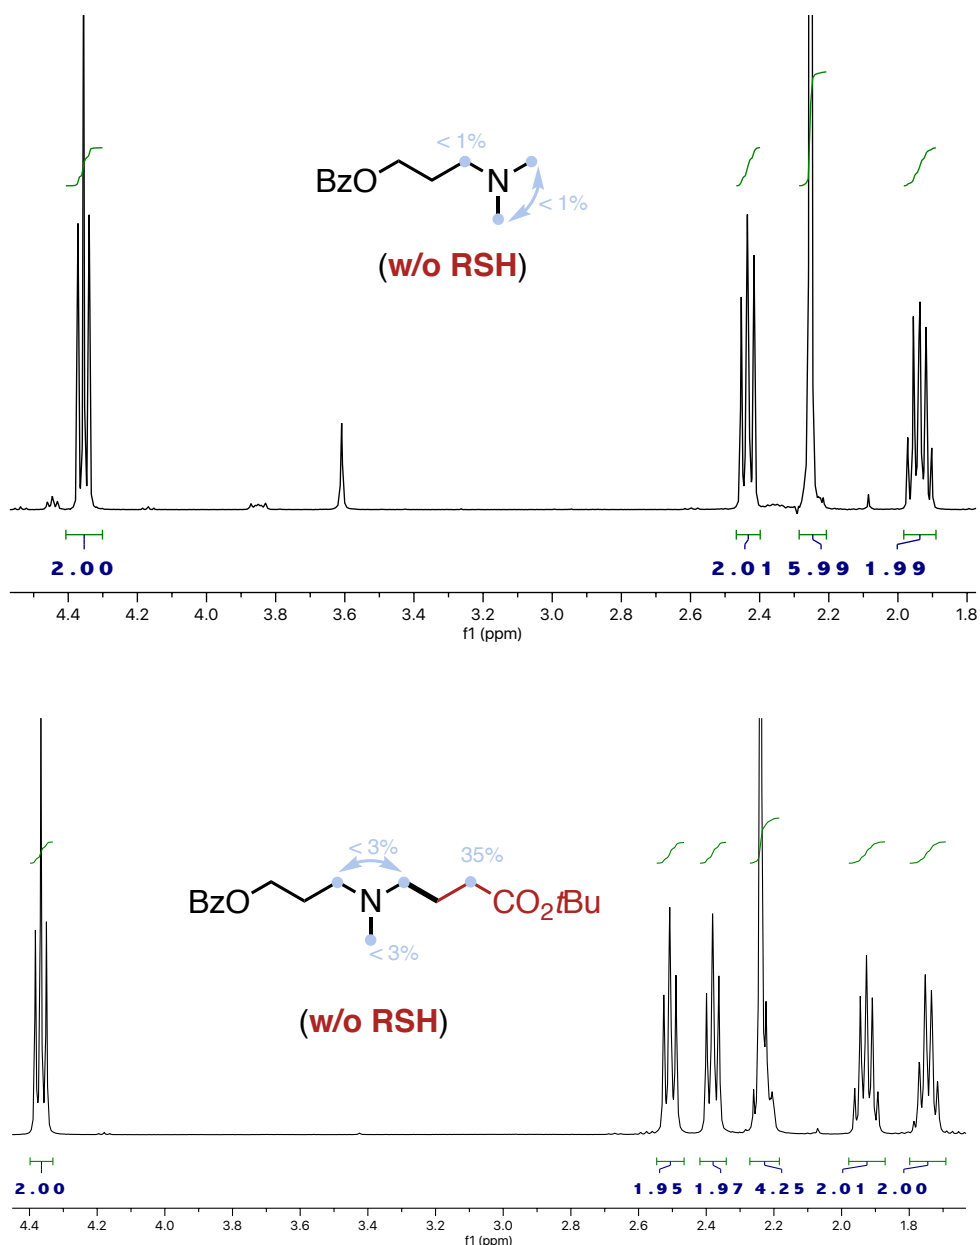

**Fig. S3. Deuteration studies with acrylate with or w/o RSH under irradiation**

AIBN (10 mol%, 3.3 mg, 0.02 mmol), TIPS-SH (20 mol%, 8.6  $\mu$ L, 0.04 mmol) and D<sub>2</sub>O (60 eq., 220  $\mu$ L, 12 mmol) in *m*-Xylene (0.1 M) were used, the reaction was stirred in preheated oil-bath (80 °C). After 4 h, the mixture was directly purified by flash column chromatography in silica gel with CHCl<sub>3</sub>/MeOH and the results were analyzed by NMR.

*(Note: We found in toluene at 80 °C, the added D<sub>2</sub>O evaporates quickly and condenses on the sides of the reaction vessel. The same issue remains in m-xylene, but with some D<sub>2</sub>O evident at the bottom.)*

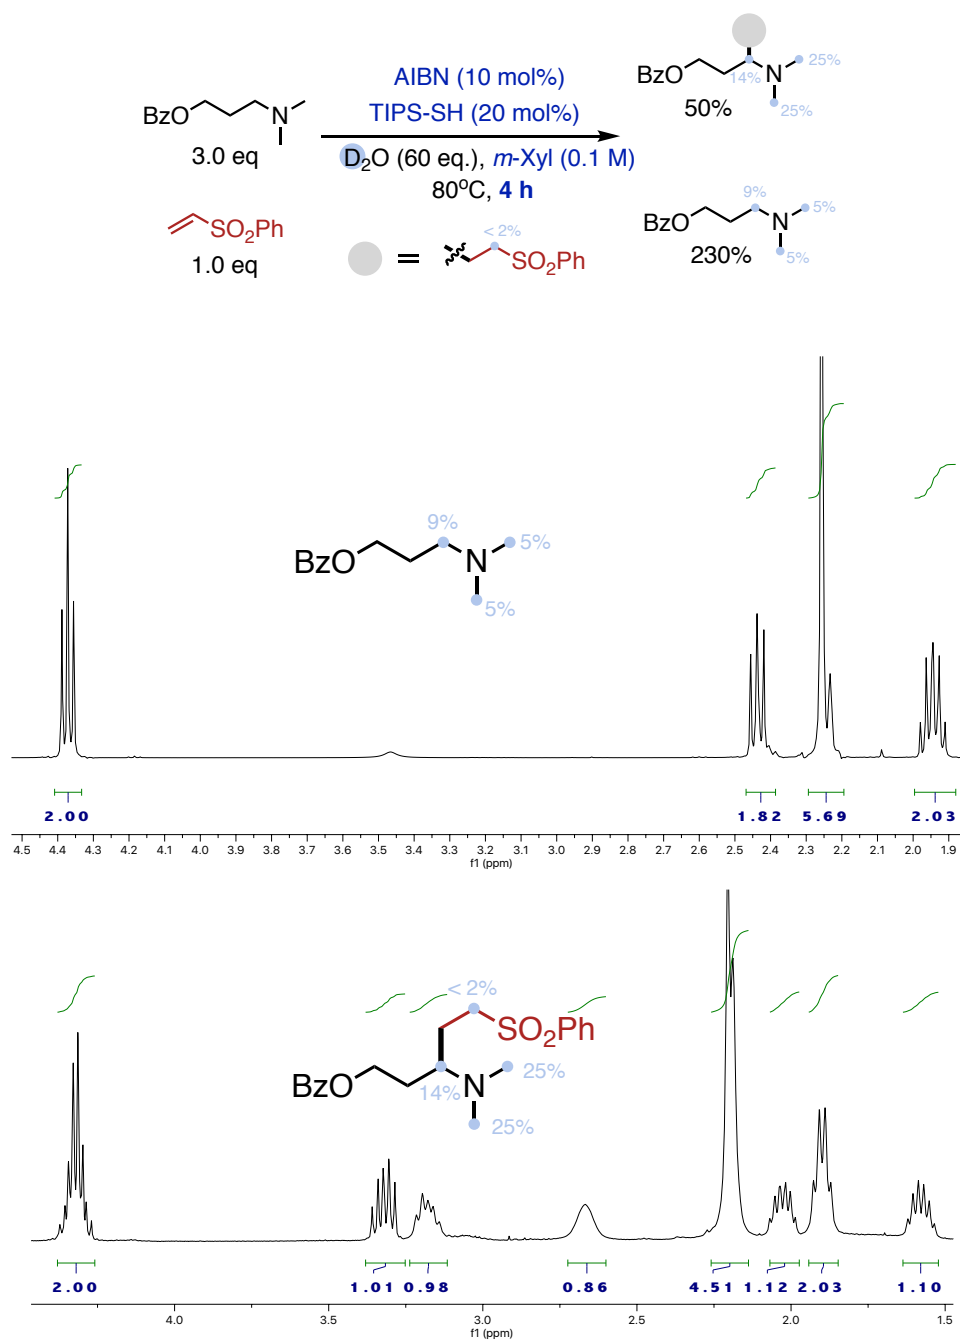

**Fig. S4. Deuteration studies with vinyl sulfone under heating**

AIBN (10 mol%, 3.3 mg, 0.02 mmol), TIPS-SH (20 mol%, 8.6  $\mu\text{L}$ , 0.04 mmol) and  $D_2O$  (60 eq., 220  $\mu\text{L}$ , 12 mmol) in *m*-Xylene (0.1 M) were used, the reaction was stirred in preheated oil-bath (80 °C). After 4 h, the mixture was directly purified by flash column chromatography in silica gel with  $\text{CHCl}_3/\text{MeOH}$  and the results were analyzed by NMR.

(Note: We found in toluene at 80 °C, the added  $D_2O$  evaporates quickly and condenses on the sides of the reaction vessel. The same issue remains in *m*-xylene, but with some  $D_2O$  evident at the bottom.)

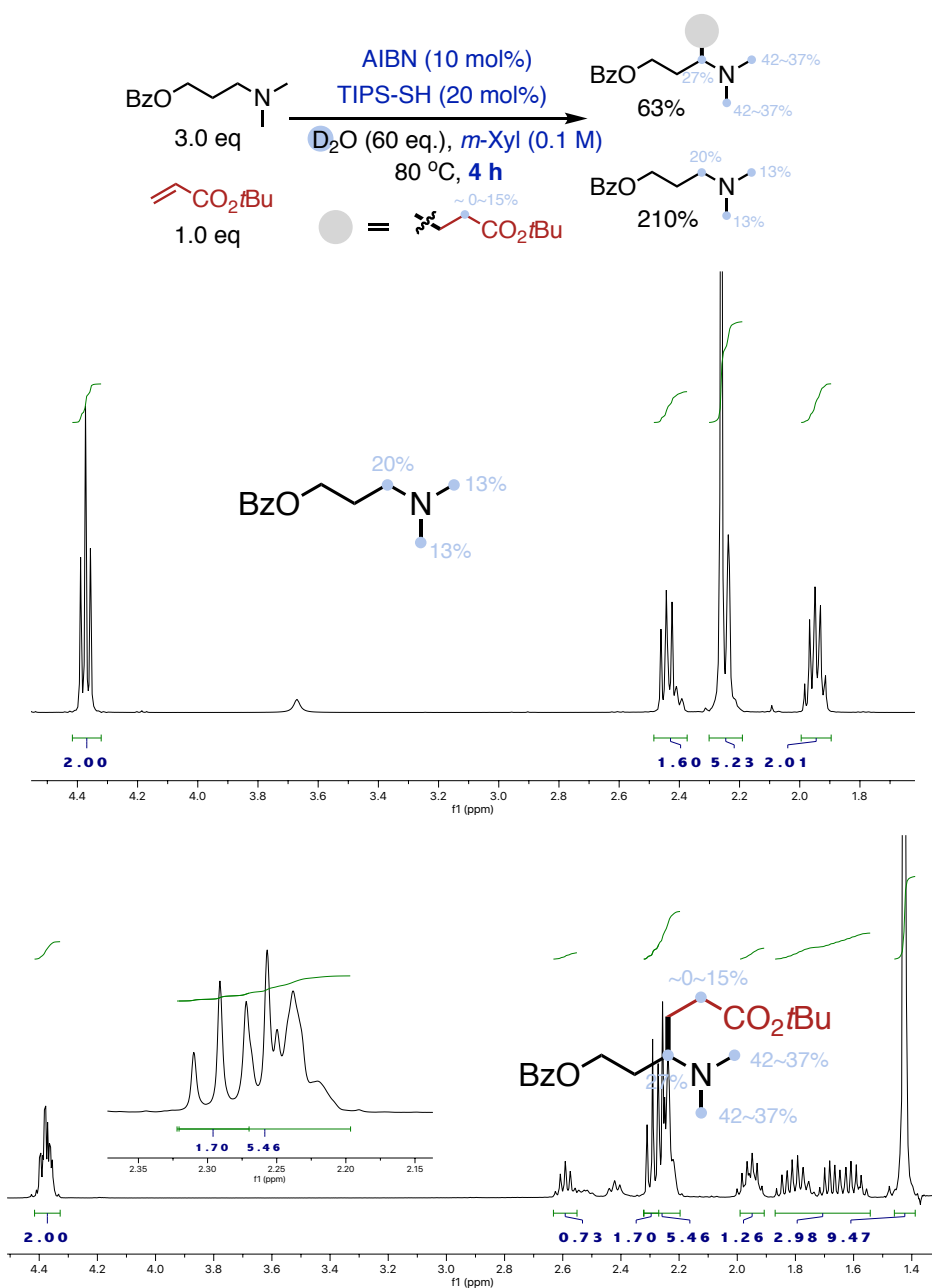

**Fig. S5. Deuteration studies with acrylate under heating**

### Cyclic Voltammetry Studies

Cyclic voltammetry (CV) studies were performed on a CH instruments Model 1232B potentiostat. All experiments were run using an EDAQ 1-mm disk glassy carbon working electrode in conjunction with an EDAQ Ag/AgCl reference electrode. Platinum wire from VWR served as the counter electrode. All voltammetry measurements were run in anhydrous acetonitrile from Sigma-Aldrich at 50 mM (5 mM for photocatalyst) using tetrabutylammonium hexafluorophosphate (0.1 M) as the electrolyte under a gentle flow of  $N_2$ . The scan rate was set

at 100 mV/s with a sensitivity of  $1.0 \times 10^{-4}$ . X-axis as Potential (V), Y-axis as Current (A). CV data of  $i\text{Pr}_3\text{SiSH}$  is known ( $E_{1/2}^{\text{ox}} = 0.28 \text{ V vs Ag/AgCl}$  in MeCN).<sup>2</sup>

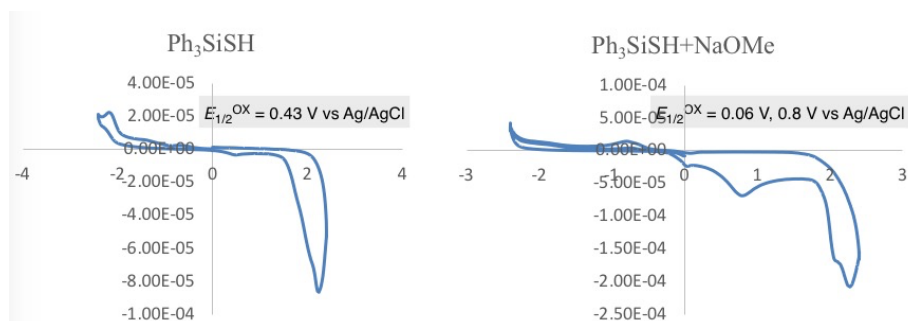

**Fig. S6.** CV of  $\text{Ph}_3\text{SiSH}$  with or w/o NaOMe

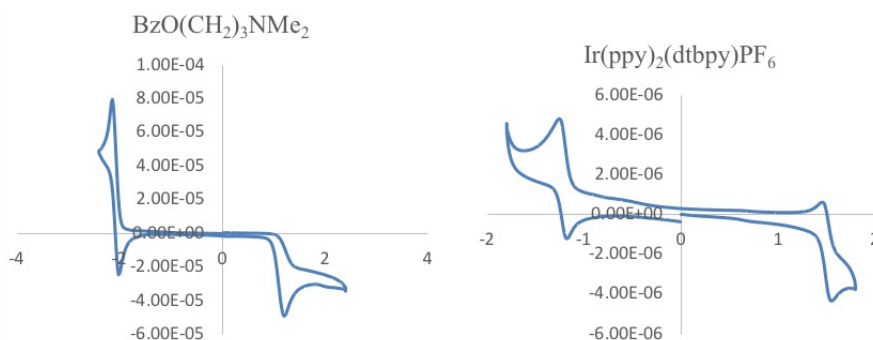

**Fig. S7.** CV of  $\text{BzO}(\text{CH}_2)_3\text{NMe}_2$

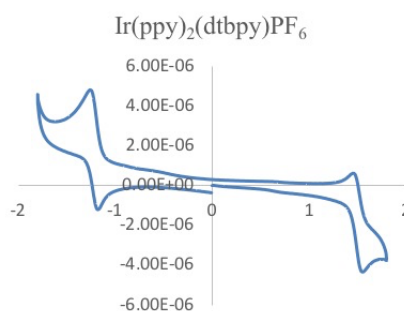

**Fig. S8.** CV of  $\text{Ir}(\text{ppy})_2(\text{dtbbpy})\text{PF}_6$

#### IV. Computational details

DFT calculations were carried out with using Gaussian16 program package (v A.03).<sup>3</sup> All structures were optimized using the M06 functional and 6-31+G(d,p) basis set, which is convenient for organic molecules with open-shell electronic structure, including implicit solvation (toluene) by CPCM method. Frequency calculations were conducted at the same level of theory to corroborate the nature of stationary points as minima (zero imaginary frequencies) or transition state (one imaginary frequency). Transition states were also confirmed by IRC calculations and relaxation towards reactants and products. The potential energy was further refined using the same method together with the 6-311++G(3d,2p) basis set. Finally, 1M standard state (addition of 1.89 kcal/mol) correction was added to all species.

3D images were created by CYLview software.<sup>4</sup>

Radical stability of primary radical of  $(i\text{Pr})_2(\text{Me})\text{N}$  vs  $(i\text{Pr})_3\text{Si-SH}$  radical was benchmarked, comparing the DFT results with CCSD(T) (+ DFT  $G_{\text{Corr}}$  + DFT  $G_{\text{Solv}}$ ). Both methodologies yield similar results, confirming the reversibility of the process.

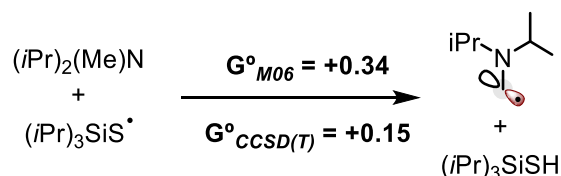

For Fig. 4 in the main text, all the calculations were carried out at the same level of theory. The starting geometries of pharmaceuticals were taken from CCDC (Cambridge Crystallographic Data Centre) for all compounds except Clormipramine (not available).  $^{13}\text{C}$  NMR shifts were calculated using the GIAO method and they are referenced to TMS (calculated at the same theory level).

### Free energy profiles of complete reaction pathway with and without HAT catalyst:

*Initiation without  $(\text{iPr})_3\text{SiSH}$*

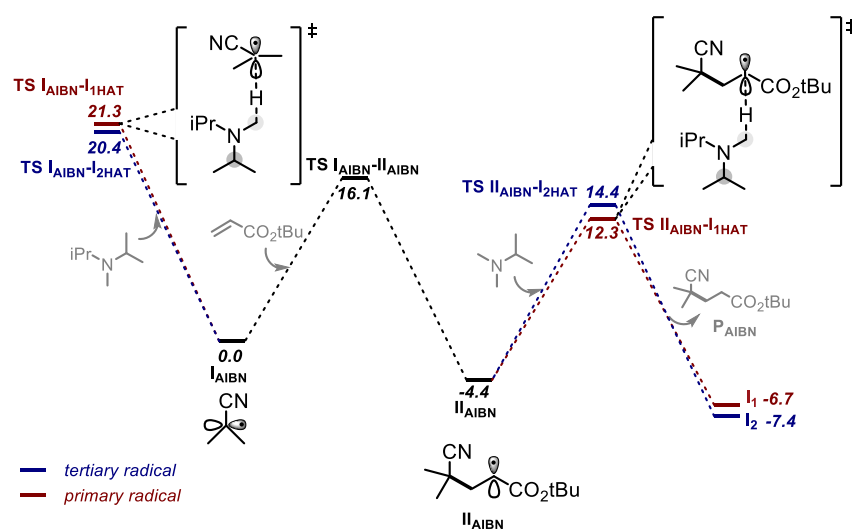

*Initiation with  $(\text{iPr})_3\text{SiSH}$*

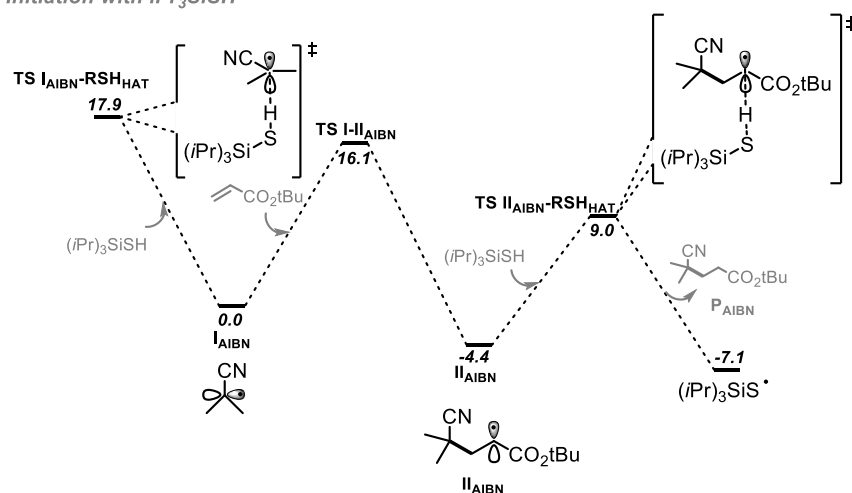

**Fig. S9. Free energy (kcal/mol) profile of the initiation mechanism under HAT-catalyst free conditions (top) and with  $(\text{iPr})_3\text{SiSH}$  as HAT catalyst (bottom).**

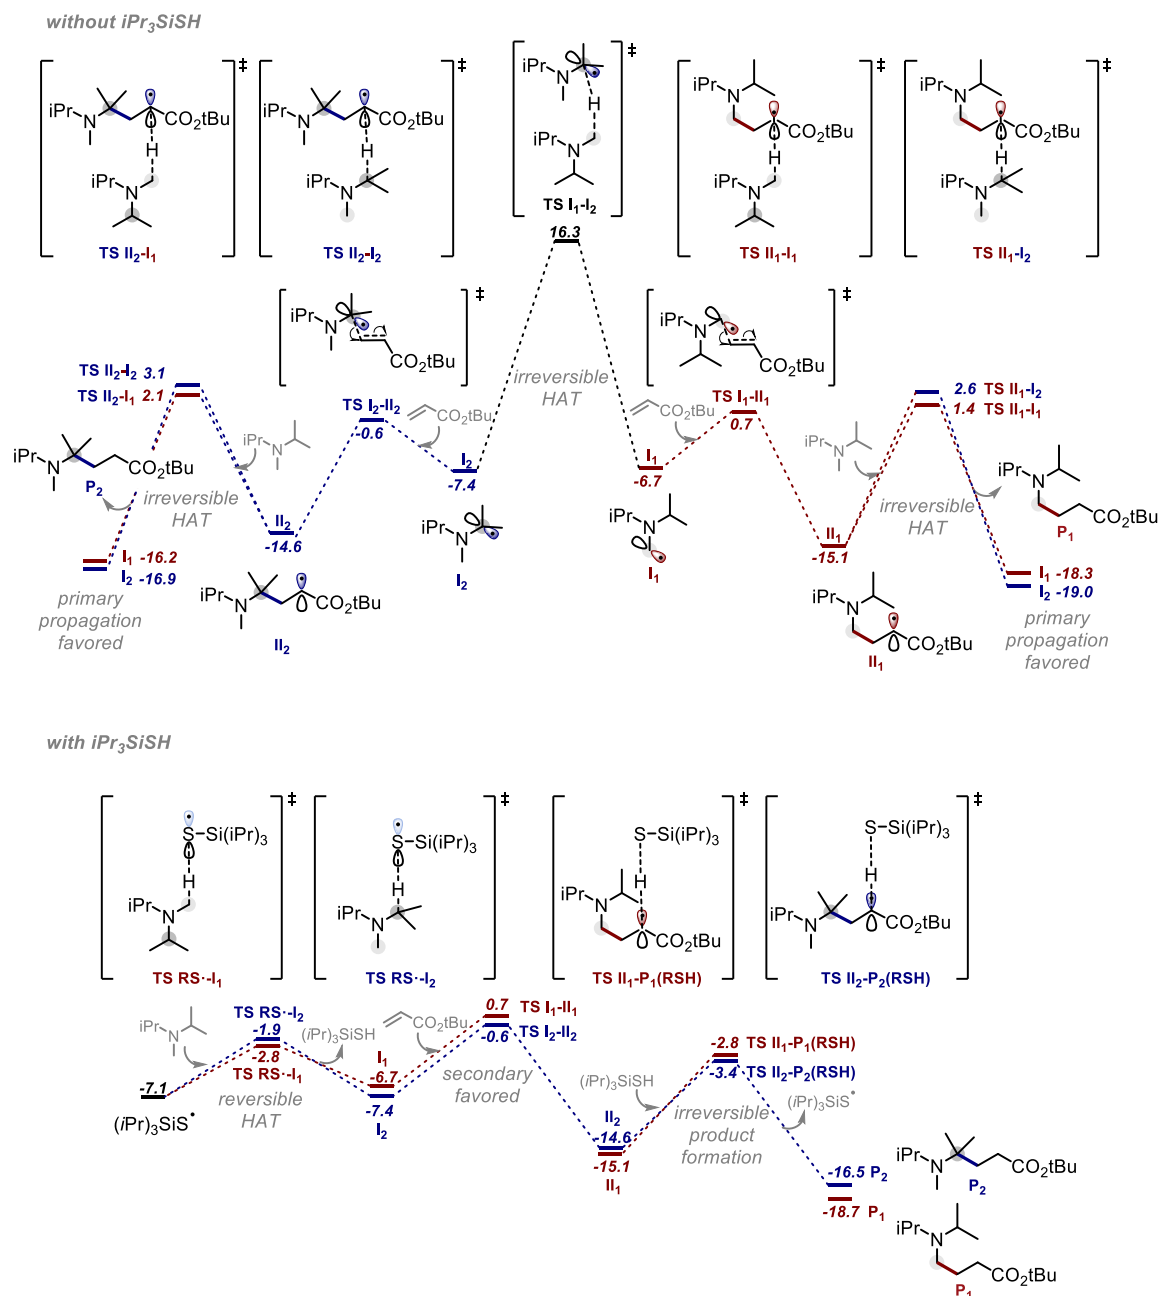

**Fig. S10. Free energy profile of radical propagation without HAT catalyst and with  $(i\text{Pr})_3\text{SiSH}$  as HAT catalyst (bottom). Free energies in kcal/mol.**

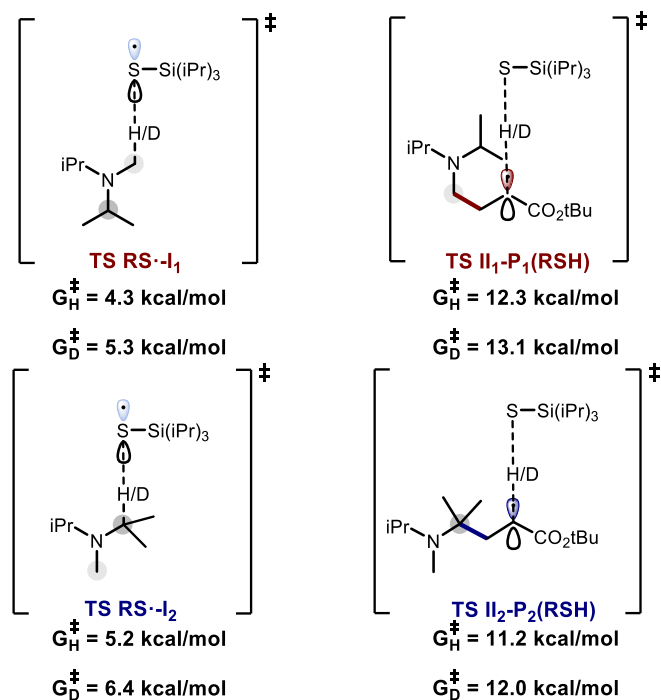

Fig. S11. Deuterium effect in HAT free energy barriers. Free energies in kcal/mol.

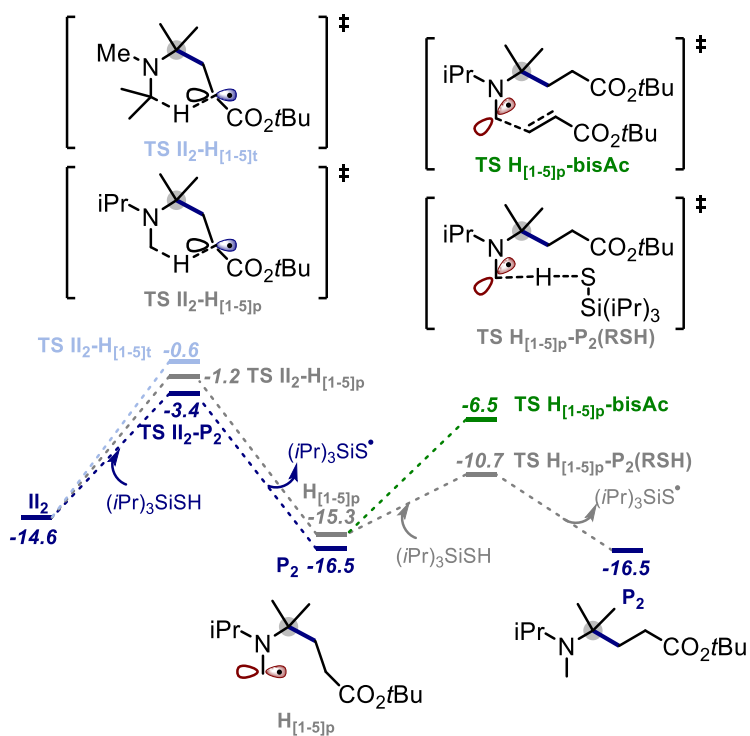

Fig. S12. Intramolecular [1,5] H-shift vs direct reaction with HAT catalyst. Free energies in kcal/mol.

|                    | $(iPr)_3SiSH$ HAT | $\alpha$ -ester HAT |
|--------------------|-------------------|---------------------|
| <b>Tertiary</b>    |                   |                     |
| $G_{Add}^\ddagger$ | 5.1               | 17.2                |
| $E_{Add}^\ddagger$ | -0.5              | 8.3                 |
| $E_{Dist}$         | 35.7              | 19.8                |
| $E_{int}$          | -35.2             | -11.6               |
| <b>Primary</b>     |                   |                     |
| $G_{Add}^\ddagger$ | 4.3               | 16.5                |
| $E_{Add}^\ddagger$ | -2.1              | 7.3                 |
| $E_{Dist}$         | 39.0              | 18.7                |
| $E_{int}$          | -41.1             | -11.4               |

**Fig. S13.** Distortion interaction analysis of HAT reaction of  $(iPr)_2(Me)N$  and silanethiyl radical or  $\alpha$ -ester radical II on primary and tertiary positions. Energies in kcal/mol.

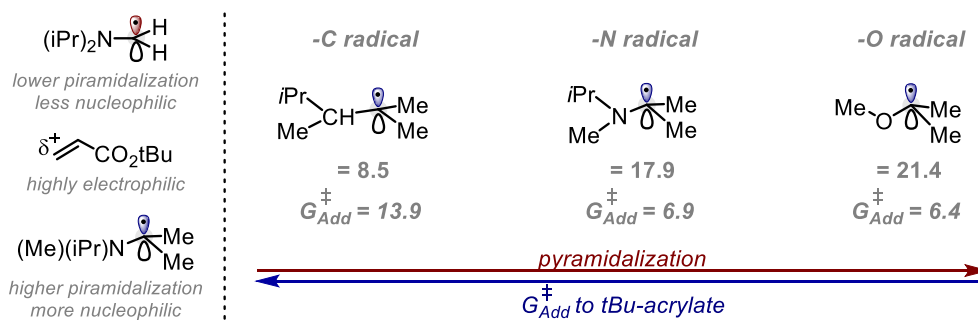

**Fig. S14.** Correlation between pyramidalization of radical and free energy barrier in radical addition to *t*Bu-acrylate. Free energies in kcal/mol.



|                    | -C radical                                                                        | -N radical                                                                         | -O radical                                                                          |
|--------------------|-----------------------------------------------------------------------------------|------------------------------------------------------------------------------------|-------------------------------------------------------------------------------------|
| <b>Tertiary</b>    | 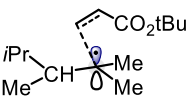 |  |  |
| $G_{Add}^\ddagger$ | 13.9                                                                              | 6.9                                                                                | 6.4                                                                                 |
| $E_{Add}^\ddagger$ | 0.8                                                                               | -5.5                                                                               | -5.4                                                                                |
| $E_{Dist}$         | 7.9                                                                               | 5.3                                                                                | 2.8                                                                                 |
| $E_{Int}$          | -7.2                                                                              | -11.9                                                                              | -8.2                                                                                |
| <b>Primary</b>     |  |  |  |
| $G_{Add}^\ddagger$ | 10.6                                                                              | 7.5                                                                                | 8.1                                                                                 |
| $E_{Add}^\ddagger$ | -2.4                                                                              | -3.8                                                                               | -3.4                                                                                |
| $E_{Dist}$         | 3.6                                                                               | 1.8                                                                                | 2.8                                                                                 |
| $E_{Int}$          | -6.0                                                                              | -5.6                                                                               | -6.2                                                                                |

**Fig. S15. Distortion interaction analysis of radical addition to *t*Bu-acrylate of  $\alpha$ -C,  $\alpha$ -N and  $\alpha$ -O primary and tertiary radicals. Energies in kcal/mol.**

Distortion-interaction analysis of the different radical addition transition states show that  $\alpha$ -O and  $\alpha$ -N tertiary transition states have a significantly smaller distortion energy. In addition, their pyramidalization favours the interaction of the radical fragment with the double bond, resulting in a lower activation energy barrier.

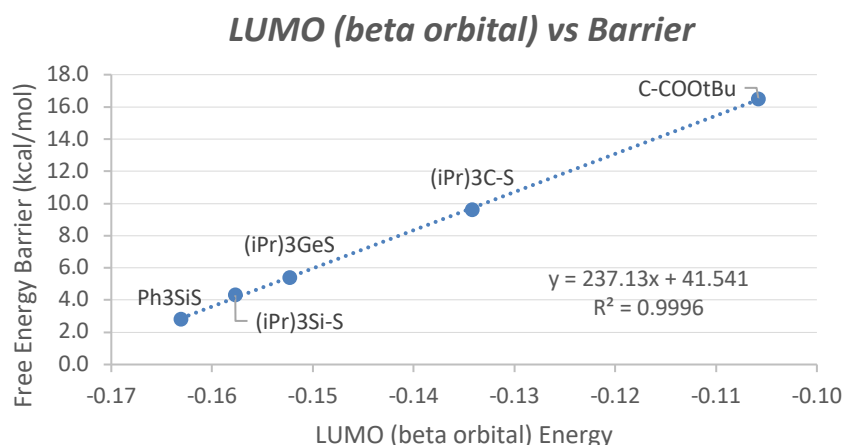

**Fig. S16. Correlation between LUMO orbital of the radical and the free energy barrier of HAT from the primary site of  $(iPr)_2(Me)N$  to the corresponding radical.**

In order to show that the HAT catalyst reacts as an electrophilic radical, we calculated the LUMO energy of the HAT catalyst radical and its correlation with the free energy barrier for

the HAT at the primary position of substrate **3**. Interestingly, there is a linear correlation of both parameters; the electrophilicity lowers the barrier considerably. The two best catalysts ( $\text{Ph}_3\text{SiSH}$  and  $(i\text{Pr})_3\text{SiSH}$ ) promote the HAT with a very low free energy barrier due to the polarity match in the transition states. In contrast, nucleophilic radicals, such as the  $\alpha$ -ester radical ( $\text{C-COO}t\text{Bu}$ ), show a significant increase of the activation barrier for HAT.

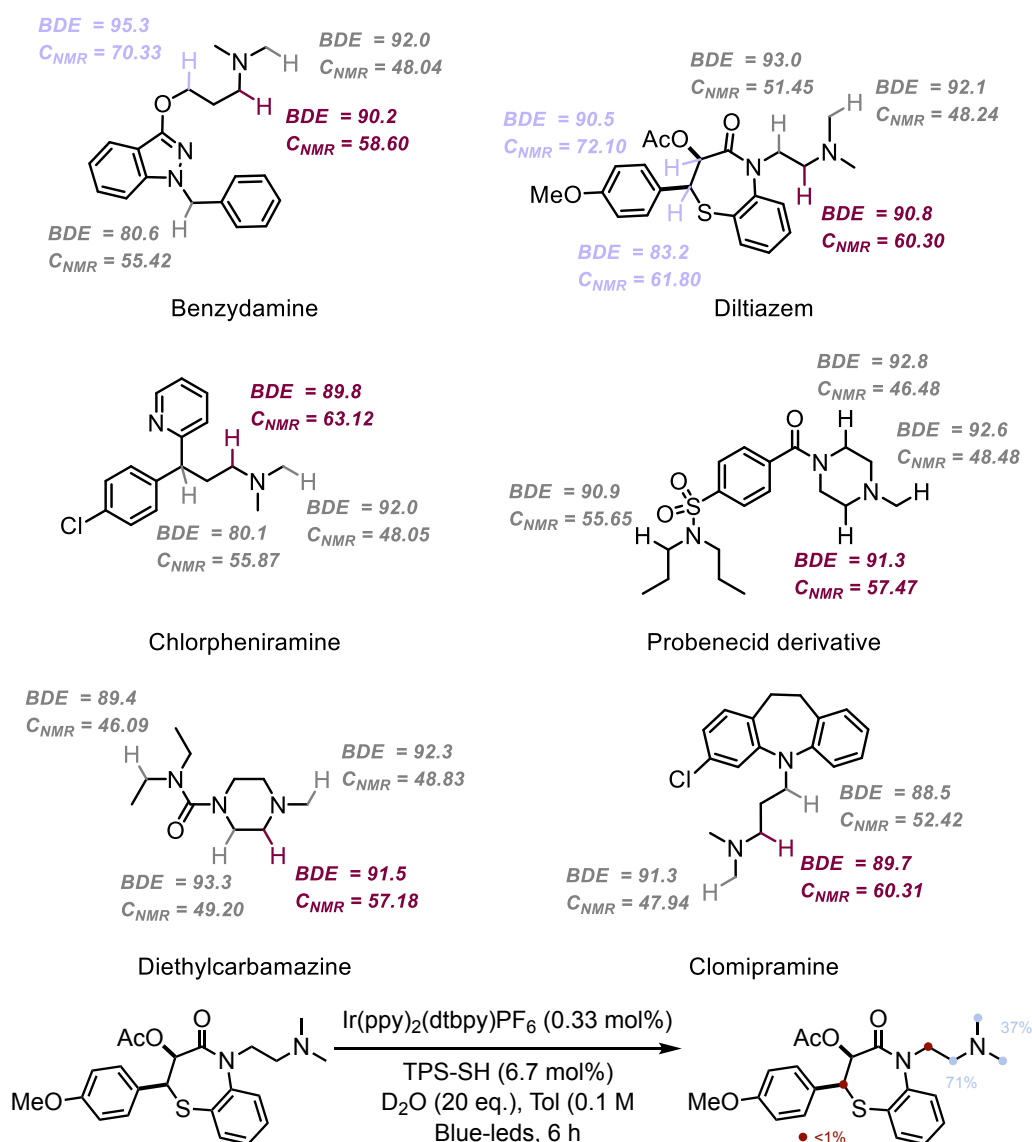

**Fig. S17. Correlation between calculated  $C_{\text{NMR}}$  shifts and site selectivity in late-stage drug functionalization.**

Correlation is only observed for  $\alpha$ -N carbon centres. In the case of other heteroatoms (O, S), this correlation does not occur due to a non-reversible C-H activation mechanism, as shown in the deuteration experiment.

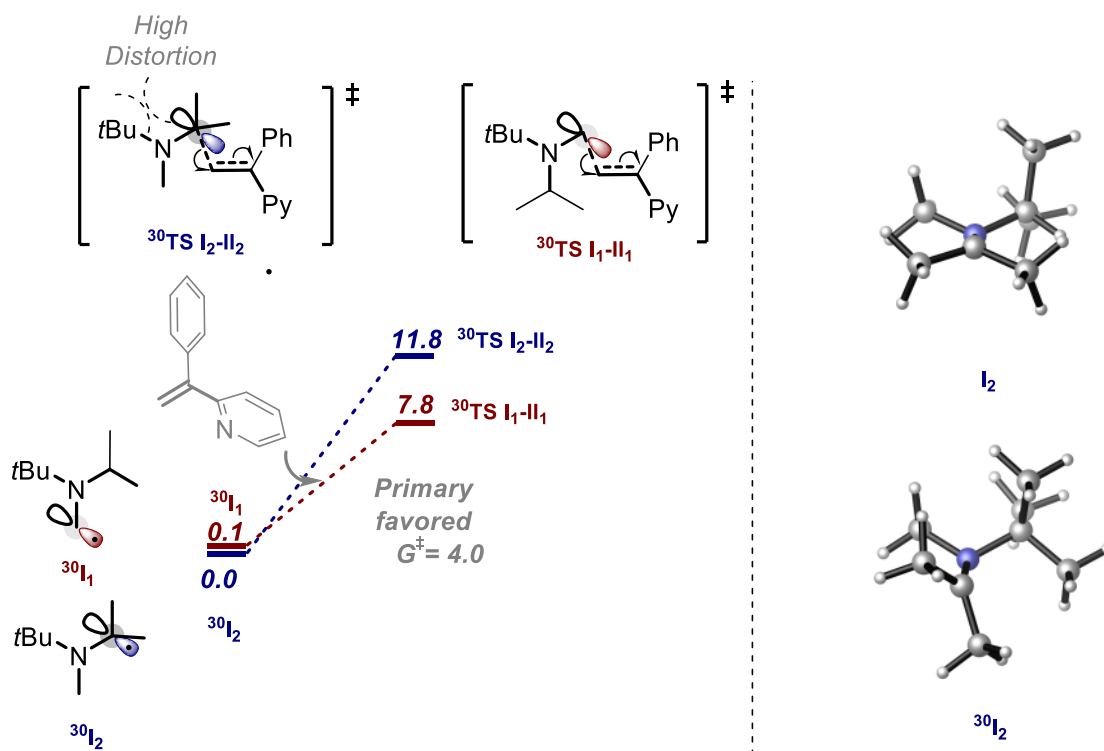

**Fig. S18. Inversion of the selectivity for radical addition to product 30 in reaction with 1-phenyl-1-pyridineethane (left). Free energies in kcal/mol. 3D structures of the corresponding tertiary radical (right).**

Interestingly, products **30** and **31** exhibit an opposite selectivity with respect to all the other substrates. In those cases, the least hindered position (methyl) reacts faster than the corresponding tertiary position (isopropyl). Intrigued by these exceptions, we calculated the radical addition to the alkene. We reproduced the observed selectivity inversion. The inversion is due to the *t*Bu substituent which distorts the tertiary radical structure considerably (and hence raises its energy).

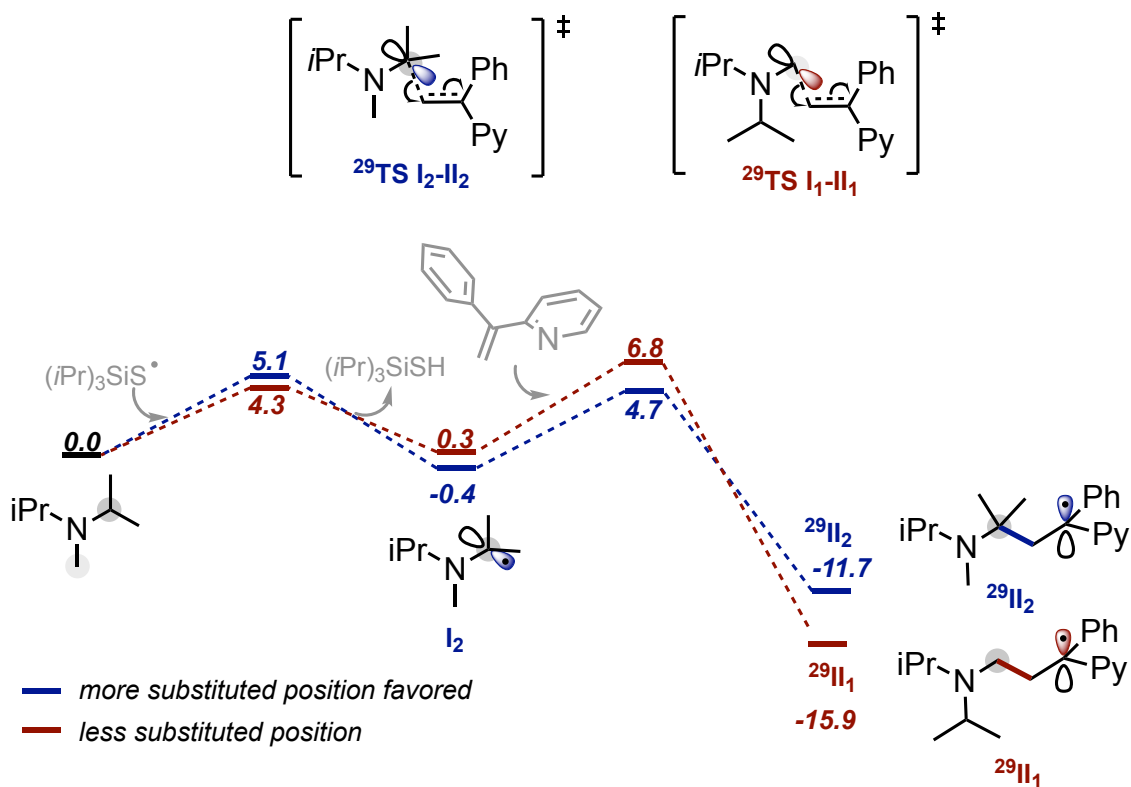

**Fig. S19. Low the selectivity for radical addition to product 27 in reaction with 1-phenyl-1-pyridineethane.**

In the case of the reaction with less substituted tertiary amines and diarylethylenes as radical acceptor, the radical addition barrier is decreased and starts to compete with the radical generation via reversible HAT process. Thus, the selectivity of those system is reduced (<3:1) as the reversibility of HAT is less pronounced.

**XYZ Coordinates of calculated species including potential energy in solvent at high basis set and free energy correction (and enthalpy correction for BDE calculation when needed):**

**N(Me)(iPr)<sub>2</sub>**

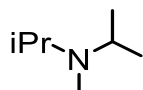

E = -331.5660948

G<sub>Corr.</sub> = 0.196476

H<sub>Corr.</sub> = 0.242820

|   |             |             |             |
|---|-------------|-------------|-------------|
| N | 0.01044200  | -0.49602600 | 0.01558100  |
| C | 0.03259500  | -0.77059500 | 1.43709000  |
| H | -0.91443600 | -1.23353100 | 1.73789000  |
| H | 0.82278500  | -1.49065500 | 1.67609900  |
| H | 0.18155100  | 0.11968000  | 2.07789700  |
| C | 1.25082400  | 0.05059100  | -0.54437000 |
| C | 2.43137200  | -0.86942000 | -0.26493600 |
| C | 1.59010800  | 1.48231900  | -0.12206100 |
| H | 1.09520500  | 0.05347500  | -1.63566500 |
| H | 2.17794000  | -1.91250000 | -0.48687900 |
| H | 3.28570200  | -0.57982100 | -0.88740900 |
| H | 2.75904300  | -0.80733900 | 0.78108000  |
| H | 0.82979600  | 2.19883200  | -0.45307300 |
| H | 1.68753200  | 1.56344400  | 0.96908800  |
| H | 2.54736100  | 1.79038300  | -0.56111000 |
| C | -1.22570200 | 0.13507500  | -0.46671500 |
| C | -1.78566100 | 1.25342900  | 0.41576700  |
| C | -2.29717800 | -0.92245200 | -0.70705900 |
| H | -0.97096000 | 0.57563200  | -1.44375400 |
| H | -1.03407800 | 2.01180600  | 0.66090900  |
| H | -2.61563600 | 1.75388300  | -0.09758100 |
| H | -2.18181900 | 0.85526300  | 1.35916200  |
| H | -1.94029400 | -1.68396000 | -1.40854400 |
| H | -2.57037000 | -1.42610300 | 0.22999700  |
| H | -3.21056200 | -0.46998300 | -1.11346400 |

**tBu-Acrylate**

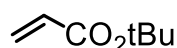

E = -424.2704695

G<sub>Corr.</sub> = 0.142635

|   |             |             |             |
|---|-------------|-------------|-------------|
| C | -3.48113800 | 0.20164900  | -0.00007500 |
| C | -2.26501700 | 0.74558800  | 0.00003600  |
| H | -4.37852400 | 0.81320400  | -0.00007700 |
| H | -3.60048600 | -0.87993800 | -0.00016200 |
| H | -2.10963900 | 1.82205300  | 0.00013300  |
| C | -1.05278100 | -0.10747400 | 0.00006600  |
| O | -1.06480000 | -1.32304000 | 0.00001900  |
| O | 0.04640600  | 0.65565600  | 0.00010200  |
| C | 1.39544900  | 0.07385800  | -0.00001700 |
| C | 1.60916800  | -0.74134900 | 1.26377700  |
| C | 1.60932400  | -0.74066200 | -1.26423200 |
| C | 2.28839600  | 1.30140600  | 0.00035700  |
| H | 1.38072800  | -0.13702200 | 2.14974300  |
| H | 0.98975700  | -1.64162600 | 1.27655900  |
| H | 2.66233000  | -1.04174000 | 1.32062900  |
| H | 1.38091800  | -0.13587500 | -2.14989300 |
| H | 2.66251500  | -1.04094200 | -1.32115600 |
| H | 0.98998900  | -1.64097800 | -1.27755700 |

|   |            |            |             |
|---|------------|------------|-------------|
| H | 3.34080900 | 0.99588000 | 0.00033000  |
| H | 2.10421500 | 1.91422000 | -0.88935100 |
| H | 2.10412400 | 1.91374700 | 0.89037200  |

**I<sub>AIBN</sub>**

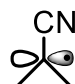

E = -210.6417195

G<sub>Corr.</sub> = 0.056627

|   |             |             |             |
|---|-------------|-------------|-------------|
| C | 0.00008000  | -1.06242900 | 1.28687500  |
| H | 0.00086800  | -0.40230800 | 2.15758200  |
| H | -0.88071400 | -1.71750200 | 1.34654300  |
| H | 0.88051100  | -1.71813400 | 1.34544700  |
| C | -0.00037100 | -0.31118000 | 0.00000000  |
| C | 0.00008000  | -1.06242900 | -1.28687500 |
| H | 0.00086800  | -0.40230800 | -2.15758200 |
| H | 0.88051100  | -1.71813400 | -1.34544700 |
| H | -0.88071400 | -1.71750200 | -1.34654300 |
| C | -0.00010400 | 1.08171700  | 0.00000000  |
| N | 0.00008000  | 2.25740200  | 0.00000000  |

**TS I<sub>AIBN</sub>-II<sub>AIBN</sub>**

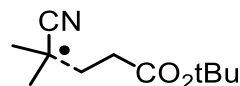

E = -634.9068043

G<sub>Corr.</sub> = 0.222495

|   |             |             |             |
|---|-------------|-------------|-------------|
| C | -2.79747600 | 0.50846100  | 0.20573800  |
| C | -1.64048100 | -0.85845800 | -1.09841800 |
| H | -1.72476400 | -1.68516600 | -0.39380100 |
| H | -2.40212400 | -0.79133100 | -1.87209600 |
| C | -0.41700500 | -0.27765700 | -1.29070900 |
| H | -0.24628600 | 0.45071500  | -2.08091500 |
| C | 0.69893000  | -0.56003200 | -0.37854800 |
| O | 0.65532400  | -1.36630300 | 0.53509500  |
| O | 1.76203500  | 0.19732100  | -0.68987500 |
| C | 3.00220700  | 0.14704900  | 0.09289600  |
| C | 2.72653000  | 0.58665300  | 1.52117200  |
| C | 3.61663500  | -1.24024300 | 0.01550600  |
| C | 3.88588400  | 1.15910500  | -0.61386200 |
| H | 2.23190600  | 1.56580600  | 1.52781500  |
| H | 2.10074000  | -0.13361800 | 2.05463400  |
| H | 3.67850300  | 0.68473300  | 2.05660900  |
| H | 3.73332700  | -1.54626700 | -1.03091000 |
| H | 4.61244900  | -1.21542400 | 0.47424900  |
| H | 3.01091800  | -1.98387700 | 0.53882800  |
| H | 4.85866900  | 1.21804700  | -0.11277500 |
| H | 4.04967600  | 0.86715000  | -1.65738100 |
| H | 3.42544400  | 2.15352000  | -0.59756100 |
| C | -1.94925800 | 0.62474300  | 1.43533400  |
| H | -1.76425800 | -0.34544000 | 1.90620800  |
| H | -0.98475100 | 1.08275800  | 1.18446500  |
| H | -2.44356000 | 1.27648200  | 2.17037600  |
| C | -2.94280000 | 1.73284500  | -0.64786200 |
| H | -3.50632800 | 2.50516800  | -0.10466000 |
| H | -1.95500900 | 2.14624200  | -0.88102000 |

|   |             |             |             |
|---|-------------|-------------|-------------|
| H | -3.47303900 | 1.52610600  | -1.58305700 |
| C | -3.94027600 | -0.33002800 | 0.30075400  |
| N | -4.85681900 | -1.05405300 | 0.34103100  |

### II<sub>AIBN</sub>

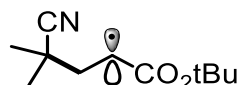

$$E = -634.9429005$$

$$G_{\text{Corr.}} = 0.226071$$

|   |             |             |             |
|---|-------------|-------------|-------------|
| C | -2.74250300 | 0.26421500  | 0.13690900  |
| C | -1.76425300 | -0.22483900 | -0.97253400 |
| H | -1.63403600 | -1.30943700 | -0.86988000 |
| H | -2.23387500 | -0.02614500 | -1.94695700 |
| C | -0.44246400 | 0.43626400  | -0.90967900 |
| H | -0.30825000 | 1.45905800  | -1.25746700 |
| C | 0.72165400  | -0.25936100 | -0.38132300 |
| O | 0.69405800  | -1.40550300 | 0.04343600  |
| O | 1.80879100  | 0.52807500  | -0.42013200 |
| C | 3.11144000  | 0.07034600  | 0.07789200  |
| C | 3.01988200  | -0.23612700 | 1.56326000  |
| C | 3.59150100  | -1.11980000 | -0.73534200 |
| C | 4.00365200  | 1.27455200  | -0.16291500 |
| H | 2.60471900  | 0.62292200  | 2.10407200  |
| H | 2.40104300  | -1.11513200 | 1.76004200  |
| H | 4.02762100  | -0.42626600 | 1.95166600  |
| H | 3.58376600  | -0.87781700 | -1.80476300 |
| H | 4.62344500  | -1.35509000 | -0.44841300 |
| H | 2.97333600  | -2.00484500 | -0.56501300 |
| H | 5.02346500  | 1.05485500  | 0.17248500  |
| H | 4.03504600  | 1.52578800  | -1.22915700 |
| H | 3.63585900  | 2.14590200  | 0.39075900  |
| C | -2.18731900 | -0.05168300 | 1.52867100  |
| H | -1.95643500 | -1.11694500 | 1.63383400  |
| H | -1.26290300 | 0.51722800  | 1.68928000  |
| H | -2.90376900 | 0.23383900  | 2.30636600  |
| C | -3.03536400 | 1.76147100  | 0.00092500  |
| H | -3.78513400 | 2.07769500  | 0.73406000  |
| H | -2.11932700 | 2.33410700  | 0.18620700  |
| H | -3.40559800 | 2.00729700  | -1.00086500 |
| C | -4.00090800 | -0.47333700 | -0.04718000 |
| N | -4.99623800 | -1.05397000 | -0.19782800 |

### TS I<sub>AIBN</sub>-I<sub>1HAT</sub>

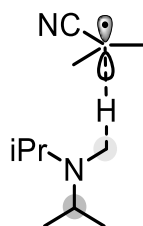

$$E = -542.189744$$

$$G_{\text{Corr.}} = 0.272013$$

|   |             |             |             |
|---|-------------|-------------|-------------|
| N | -1.26017900 | 0.02814600  | -0.55865400 |
| C | -0.14985500 | 0.34030900  | -1.33850100 |
| H | -0.02749900 | -0.32738100 | -2.19976800 |
| H | -0.09710700 | 1.39495500  | -1.62929700 |
| H | 1.03756200  | 0.15947500  | -0.69405800 |
| C | -1.78445200 | 1.04469400  | 0.36186100  |
| C | -2.60685500 | 2.07664800  | -0.40018700 |
| C | -0.70070100 | 1.70450500  | 1.20807700  |
| H | -2.46303700 | 0.51556000  | 1.04458400  |
| H | -3.41612300 | 1.59318600  | -0.95941600 |
| H | -3.04626500 | 2.80618300  | 0.29029800  |

|   |             |             |             |
|---|-------------|-------------|-------------|
| H | -1.98242200 | 2.62992500  | -1.11369500 |
| H | -0.11806100 | 0.96777100  | 1.77263200  |
| H | -0.00450300 | 2.28276600  | 0.58549800  |
| H | -1.15662800 | 2.40142100  | 1.92092600  |
| C | -1.51383200 | -1.38647000 | -0.27132800 |
| C | -2.99924500 | -1.70972000 | -0.35648200 |
| C | -0.91324400 | -1.83921300 | 1.05596600  |
| H | -1.00418000 | -1.93559200 | -1.07797700 |
| H | -3.41293200 | -1.39960400 | -1.32247800 |
| H | -3.15768900 | -2.78804400 | -0.24002300 |
| H | -3.56989200 | -1.21059100 | 0.43721000  |
| H | 0.15951100  | -1.61821200 | 1.11077800  |
| H | -1.40199100 | -1.34351600 | 1.90503400  |
| H | -1.04756800 | -2.91987100 | 1.18437500  |
| C | 3.02699600  | 1.20220900  | -0.94251500 |
| H | 2.70925000  | 2.11973400  | -0.43404800 |
| H | 4.12384600  | 1.14874800  | -0.89464700 |
| H | 2.74541400  | 1.28303500  | -2.00118700 |
| C | 2.37780200  | -0.02511700 | -0.34096300 |
| C | 2.71285100  | -1.32904000 | -1.03298700 |
| H | 2.15230100  | -2.17080500 | -0.60900000 |
| H | 2.46155000  | -1.25434700 | -2.09921800 |
| H | 3.78409200  | -1.56444500 | -0.96116300 |
| C | 2.40136900  | -0.08446700 | 1.08107500  |
| N | 2.34980300  | -0.13334400 | 2.25015900  |

### TS I<sub>AIBN</sub>-I<sub>2HAT</sub>

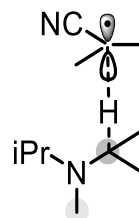

$$E = -542.1910491$$

$$G_{\text{Corr.}} = 0.271773$$

|   |             |             |             |
|---|-------------|-------------|-------------|
| N | -1.34305400 | 0.43331300  | 0.43573600  |
| C | -1.55785400 | 0.03015100  | 1.81346500  |
| H | -2.53882700 | -0.44820600 | 1.89915300  |
| H | -0.79900800 | -0.67917100 | 2.18624600  |
| H | -1.57251600 | 0.90116700  | 2.47358300  |
| C | -0.22667900 | 1.24551100  | 0.11544100  |
| C | 0.31339300  | 2.06374000  | 1.26443100  |
| C | -0.40281900 | 2.08720700  | -1.13331800 |
| H | 0.82415900  | 0.44867200  | -0.15646200 |
| H | 0.67523600  | 1.44251000  | 2.09255500  |
| H | 1.15309000  | 2.67340000  | 0.91329900  |
| H | -0.44995500 | 2.75275300  | 1.65774300  |
| H | -0.76227300 | 1.52215500  | -1.99910100 |
| H | -1.12930600 | 2.89202300  | -0.93853800 |
| H | 0.54826800  | 2.55508600  | -1.41461800 |
| C | -1.81483400 | -0.52550900 | -0.57990000 |
| C | -3.28549700 | -0.28926100 | -0.89321500 |
| C | -1.55085400 | -1.98334900 | -0.21223600 |
| H | -1.23559300 | -0.32210800 | -1.48994400 |
| H | -3.44752000 | 0.73409900  | -1.25111700 |
| H | -3.63841300 | -0.98909400 | -1.66057800 |
| H | -3.90492800 | -0.43729200 | 0.00127600  |
| H | -0.51311500 | -2.14609100 | 0.10414200  |
| H | -2.20576500 | -2.32917400 | 0.59674400  |
| H | -1.74675000 | -2.61934000 | -1.08382300 |
| C | 3.12381400  | 0.68862500  | -0.33515400 |
| H | 3.24813300  | 1.10147300  | 0.67185400  |
| H | 4.07875400  | 0.23056000  | -0.63186800 |
| H | 2.93023700  | 1.51826900  | -1.02743200 |
| C | 1.99306100  | -0.31483200 | -0.40060200 |
| C | 1.74930100  | -0.90564200 | -1.77220200 |
| H | 0.90563500  | -1.60571900 | -1.77479200 |
| H | 1.53109500  | -0.10206000 | -2.48780400 |
| H | 2.63500300  | -1.44386100 | -2.13970700 |

|   |            |             |            |
|---|------------|-------------|------------|
| C | 1.96191000 | -1.24627300 | 0.67714700 |
| N | 1.85686900 | -1.96935000 | 1.59227200 |

### TS II<sub>AIBN-I<sub>1</sub>HAT</sub>

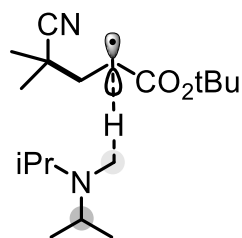

E = -966.49896

G<sub>Corr.</sub> = 0.439079

|   |             |             |             |
|---|-------------|-------------|-------------|
| C | 3.37950200  | -1.31347200 | 0.24856800  |
| C | 1.87152700  | -1.50034500 | -0.06890400 |
| H | 1.73976600  | -1.52557000 | -1.15979200 |
| H | 1.57833400  | -2.49087300 | 0.31302500  |
| C | 0.96698700  | -0.44472600 | 0.50291300  |
| H | 1.01938700  | -0.28858700 | 1.58385700  |
| C | 0.80330300  | 0.78440200  | -0.26420600 |
| O | 0.91685000  | 0.87179800  | -1.48161300 |
| O | 0.45198700  | 1.81916800  | 0.53562100  |
| C | 0.28213400  | 3.17477100  | 0.01809500  |
| C | 1.59643700  | 3.67279600  | -0.56193800 |
| C | -0.85368500 | 3.23813600  | -0.99081200 |
| C | -0.07888700 | 3.96710600  | 1.26315900  |
| H | 2.39754100  | 3.57807200  | 0.18174000  |
| H | 1.87751900  | 3.11707400  | -1.46069200 |
| H | 1.50013200  | 4.73371700  | -0.82313500 |
| H | -1.77646100 | 2.83476000  | -0.55427500 |
| H | -1.03839700 | 4.28655400  | -1.25582600 |
| H | -0.61879200 | 2.68171300  | -1.90183500 |
| H | -0.23094600 | 5.02172200  | 1.00598600  |
| H | -1.00252900 | 3.58207900  | 1.71210600  |
| O | 0.72260200  | 3.90206600  | 2.00791800  |
| N | -2.52804100 | -1.52064900 | 0.05057300  |
| C | -2.80952700 | -1.38858200 | -1.38215800 |
| H | -2.11190600 | -2.08216900 | -1.87397700 |
| C | -1.28662400 | -2.00702600 | 0.44001400  |
| H | -0.28944100 | -1.10652000 | 0.41497400  |
| C | -3.31341000 | -0.73419600 | 1.00924800  |
| C | -2.48655700 | 0.34090700  | 1.70525000  |
| C | -4.00505800 | -1.64743500 | 2.01398000  |
| H | -4.09184800 | -0.22769600 | 0.42309000  |
| H | -1.95785400 | 0.97679400  | 0.98546100  |
| H | -3.13727800 | 0.97629200  | 2.31753000  |
| H | -1.73372800 | -0.09994500 | 2.37210500  |
| H | -4.64537200 | -2.37606700 | 1.50415600  |
| H | -3.27012400 | -2.19992800 | 2.61360900  |
| H | -4.62377200 | -1.06223500 | 2.70459800  |
| C | 3.65356200  | -1.44823600 | 1.75055800  |
| H | 3.27178800  | -2.39873000 | 2.14082100  |
| H | 4.72834200  | -1.39613200 | 1.95661600  |
| H | 3.16630300  | -0.62830000 | 2.28976100  |
| C | 3.91719800  | 0.02455900  | -0.26967500 |
| H | 3.71110800  | 0.15320500  | -1.33737800 |
| H | 3.43693600  | 0.84704200  | 0.27519600  |
| H | 4.99806700  | 0.09598400  | -0.10492200 |
| H | -0.90212600 | -2.78103800 | -0.23341800 |
| H | -1.24340500 | -2.32095000 | 1.48954400  |
| C | -2.52676600 | 0.01262700  | -1.91095800 |
| H | -1.48591200 | 0.30475100  | -1.72506200 |
| H | -2.69973200 | 0.05125800  | -2.99319000 |
| H | -3.18935700 | 0.75526300  | -1.44557900 |
| C | -4.22477100 | -1.84487000 | -1.71082900 |
| H | -4.40776500 | -2.85860000 | -1.33758700 |
| H | -4.98035000 | -1.17698900 | -1.27743600 |
| H | -4.37518100 | -1.84256900 | -2.79638900 |
| C | 4.09365800  | -2.39869300 | -0.44160500 |

|   |            |             |             |
|---|------------|-------------|-------------|
| N | 4.64798600 | -3.26356800 | -0.98598400 |
|---|------------|-------------|-------------|

### TS II<sub>AIBN-I<sub>2</sub>HAT</sub>

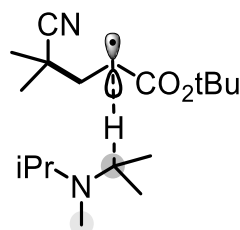

E = -966.4976004

G<sub>Corr.</sub> = 0.440929

|   |             |             |             |
|---|-------------|-------------|-------------|
| C | 3.41210700  | -0.51673700 | 0.50542500  |
| C | 2.11109500  | -1.01561400 | -0.18163800 |
| H | 2.21942300  | -0.89045800 | -1.26794200 |
| H | 2.02728600  | -2.09555300 | 0.01402200  |
| C | 0.86008700  | -0.31535600 | 0.26840400  |
| H | 0.63127200  | -0.35070800 | 1.33719600  |
| C | 0.51792500  | 0.95134900  | -0.37847000 |
| O | 0.79351900  | 1.22942800  | -1.53793600 |
| O | -0.18872100 | 1.75549700  | 0.44555600  |
| C | -0.77666800 | 3.00609200  | -0.03510300 |
| C | 0.31133300  | 3.95957500  | -0.50408300 |
| C | -1.80548300 | 2.70692400  | -1.11405000 |
| C | -1.45683300 | 3.56681700  | 1.20251200  |
| H | 1.07285000  | 4.07420600  | 0.27784200  |
| H | 0.79394900  | 3.60833300  | -1.41869500 |
| H | -0.13040700 | 4.94561000  | -0.69349000 |
| H | -2.52449000 | 1.96119600  | -0.74898000 |
| H | -2.35558000 | 3.62422900  | -1.35729300 |
| H | -1.33645800 | 2.32922100  | -2.02709400 |
| H | -1.91913800 | 4.53229000  | 0.96691000  |
| H | -2.23963600 | 2.88938700  | 1.56294600  |
| H | -0.72810800 | 3.71831400  | 2.00723900  |
| N | -2.31247900 | -1.24131900 | -0.28918500 |
| C | -3.47006100 | -1.04226400 | -1.13848800 |
| H | -4.22313200 | -0.45365100 | -0.60436300 |
| H | -3.20772500 | -0.48046700 | -2.04020000 |
| H | -3.94285400 | -1.99128600 | -1.45185100 |
| C | -1.14117700 | -1.83145700 | -0.82686200 |
| C | -0.92096900 | -1.56392700 | -2.29459000 |
| C | -0.84712900 | -3.27351900 | -0.45137700 |
| H | -0.16464500 | -1.14045800 | -0.25609800 |
| H | -1.00783700 | -0.49768300 | -2.53379600 |
| H | 0.08895100  | -1.88310300 | -2.57666400 |
| H | -1.62898800 | -2.12691300 | -2.92189500 |
| H | -0.82506800 | -3.44516200 | 0.63048900  |
| H | -1.61686900 | -3.93483000 | -0.88238900 |
| H | 0.12169400  | -3.58439800 | -0.85965300 |
| C | -2.57086900 | -1.41995000 | 1.14287700  |
| C | -3.61492300 | -2.49164300 | 1.44457400  |
| C | -2.92618200 | -0.09184100 | 1.79804200  |
| H | -1.61463900 | -1.74105800 | 1.58002400  |
| H | -3.37525100 | -3.44222000 | 0.95361600  |
| H | -3.67435300 | -2.66998000 | 2.52469700  |
| H | -4.61266200 | -2.17989800 | 1.10965900  |
| H | -2.12208600 | 0.63419700  | 1.62986200  |
| H | -3.85956600 | 0.32441400  | 1.39508600  |
| H | -3.06622100 | -0.22239300 | 2.87808000  |
| C | 3.39108400  | -0.79420600 | 2.01250400  |
| H | 3.19705000  | -1.85300400 | 2.21956200  |
| H | 4.34762200  | -0.52131200 | 2.47157500  |
| H | 2.60629400  | -0.19527200 | 2.48776300  |
| C | 3.66358700  | 0.97204600  | 0.24288000  |
| H | 3.67088500  | 1.19376900  | -0.82951400 |
| H | 2.87113600  | 1.56798700  | 0.71313100  |
| H | 4.62111300  | 1.28323900  | 0.67495500  |
| C | 4.52010200  | -1.28456600 | -0.08315400 |
| N | 5.38757000  | -1.90101500 | -0.55111600 |

**P<sub>AIBN</sub>**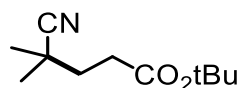

E = -635.5980074

G<sub>Corr.</sub> = 0.240686

|   |             |             |             |
|---|-------------|-------------|-------------|
| C | -2.46022800 | 0.31618700  | -0.06927500 |
| C | -1.84573200 | -0.94286000 | -0.72328500 |
| H | -1.76689600 | -1.73847500 | 0.02909200  |
| H | -2.54407600 | -1.29920200 | -1.49129500 |
| C | 0.65766200  | -0.77559600 | -0.35066400 |
| O | 0.69194200  | -1.53970200 | 0.59137200  |
| O | 1.61034500  | 0.10609100  | -0.66473100 |
| C | 2.83798500  | 0.24383700  | 0.13694600  |
| C | 2.48272100  | 0.70866800  | 1.53839700  |
| C | 3.61846300  | -1.05875900 | 0.13048700  |
| C | 3.60076700  | 1.32500300  | -0.60647300 |
| H | 1.88553100  | 1.62794000  | 1.49563900  |
| H | 1.92784100  | -0.05328200 | 2.09223900  |
| H | 3.40606500  | 0.93205000  | 2.08604800  |
| H | 3.78169300  | -1.39975300 | -0.89880400 |
| H | 4.59969900  | -0.88725200 | 0.58902700  |
| H | 3.10639900  | -1.84509700 | 0.69006100  |
| H | 4.54693000  | 1.53147200  | -0.09373600 |
| H | 3.82329700  | 1.00707800  | -1.63135100 |
| H | 3.01805100  | 2.25225700  | -0.64690000 |
| C | -1.54624600 | 0.92281300  | 1.00238600  |
| H | -1.25997900 | 0.18106600  | 1.75582000  |
| H | -0.63472300 | 1.31557800  | 0.53402100  |
| H | -2.04489600 | 1.75884700  | 1.50471400  |
| C | -2.82404400 | 1.37772600  | -1.11526900 |
| H | -3.33634000 | 2.22435800  | -0.64538600 |
| H | -1.91724800 | 1.76203000  | -1.59496300 |
| H | -3.47949500 | 0.96375200  | -1.88965000 |
| C | -3.70810000 | -0.11359900 | 0.58226300  |
| N | -4.69658000 | -0.45141500 | 1.09160500  |
| C | -0.47362900 | -0.72868100 | -1.35014000 |
| H | -0.27844100 | -1.54802200 | -2.05532000 |
| H | -0.41336600 | 0.19500300  | -1.93585200 |

**(iPr)<sub>3</sub>SiSH**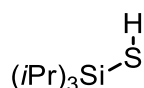

E = -1043.769941

G<sub>Corr.</sub> = 0.2466

|    |             |             |             |
|----|-------------|-------------|-------------|
| Si | 0.03299000  | 0.05028300  | 0.15902500  |
| S  | -0.75725400 | 0.42367700  | 2.17464300  |
| H  | -0.14963000 | -0.64987800 | 2.72587100  |
| C  | 1.79729200  | 0.76492700  | 0.10602700  |
| C  | 2.30493700  | 1.08740300  | -1.30003700 |
| C  | 2.79608400  | -0.11781000 | 0.85259600  |
| H  | 1.70981600  | 1.71426600  | 0.66100800  |
| H  | 1.65201700  | 1.78900000  | -1.83373600 |
| H  | 3.30456000  | 1.54207500  | -1.25382000 |
| H  | 2.39484900  | 0.18480800  | -1.91991600 |
| H  | 2.46491100  | -0.35402900 | 1.87277300  |
| H  | 2.95991000  | -1.06883000 | 0.32626400  |
| H  | 3.77375300  | 0.37707300  | 0.93270900  |
| C  | 0.04154000  | -1.82848100 | -0.13150700 |
| C  | 0.44434200  | -2.15388500 | -1.57242200 |
| C  | -1.24870600 | -2.55696000 | 0.24056100  |
| H  | 0.83795600  | -2.20107100 | 0.53647900  |
| H  | 1.42481700  | -1.74170000 | -1.84148000 |
| H  | 0.49441800  | -3.24081600 | -1.72652600 |

|   |             |             |             |
|---|-------------|-------------|-------------|
| H | -0.28870700 | -1.76100000 | -2.29134400 |
| H | -1.56524400 | -2.35213000 | 1.26987800  |
| H | -2.07828100 | -2.27059500 | -0.41835400 |
| H | -1.11665700 | -3.64324500 | 0.13914200  |
| C | -1.08781400 | 1.04051600  | -1.00562600 |
| C | -1.12102100 | 2.51607400  | -0.60091000 |
| C | -2.50726100 | 0.48996200  | -1.12821300 |
| H | -0.60335300 | 0.96679000  | -1.99523100 |
| H | -0.12030900 | 2.95804200  | -0.51432500 |
| H | -1.68177200 | 3.10887500  | -1.33660500 |
| H | -1.62414200 | 2.64739400  | 0.36743300  |
| H | -2.52979900 | -0.51187600 | -1.57320400 |
| H | -2.99949900 | 0.42973000  | -0.14746400 |
| H | -3.12175100 | 1.14385600  | -1.76301200 |

**(iPr)<sub>3</sub>SiS·**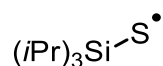

E = -1043.125448

G<sub>Corr.</sub> = 0.23825

|    |             |             |             |
|----|-------------|-------------|-------------|
| Si | 0.04995300  | 0.04702300  | 0.17928100  |
| S  | -0.55803900 | 0.12612900  | 2.25805600  |
| C  | 1.90691600  | 0.48126800  | 0.13983400  |
| C  | 2.39711700  | 0.89576400  | -1.24882600 |
| C  | 2.76819600  | -0.64773800 | 0.70178900  |
| H  | 2.00720700  | 1.35183300  | 0.80980300  |
| H  | 1.85359700  | 1.75794100  | -1.65336200 |
| H  | 3.46161400  | 1.16662900  | -1.21363600 |
| H  | 2.30131300  | 0.07504000  | -1.97324000 |
| H  | 2.42271000  | -0.98464900 | 1.68726100  |
| H  | 2.76703000  | -1.51809200 | 0.03019600  |
| H  | 3.81318100  | -0.32516000 | 0.80637500  |
| C  | -0.26295200 | -1.76685400 | -0.32486800 |
| C  | -0.12674000 | -1.93703000 | -1.83854100 |
| C  | -1.58394100 | -2.34973800 | 0.17600900  |
| H  | 0.55421800  | -2.32273400 | 0.16287500  |
| H  | 0.84514400  | -1.59506300 | -2.21723300 |
| H  | -0.23182200 | -2.99491600 | -2.11789700 |
| H  | -0.90662000 | -1.38262200 | -2.37883500 |
| H  | -1.65954600 | -2.32235800 | 1.27108900  |
| H  | -2.45044400 | -1.80953800 | -0.22645200 |
| H  | -1.68189300 | -3.39898300 | -0.13606300 |
| C  | -0.93597900 | 1.31279100  | -0.83209600 |
| C  | -0.71218000 | 2.72320400  | -0.28423800 |
| C  | -2.42961400 | 1.00240700  | -0.90081300 |
| H  | -0.52275600 | 1.26516300  | -1.85495100 |
| H  | 0.34790800  | 3.00550100  | -0.25041100 |
| H  | -1.23261400 | 3.46975300  | -0.89996300 |
| H  | -1.11043600 | 2.80979200  | 0.73688000  |
| H  | -2.63935300 | 0.05707500  | -1.41617500 |
| H  | -2.86744700 | 0.93925700  | 0.10567200  |
| H  | -2.96664800 | 1.79529800  | -1.44024200 |

**TS I<sub>AIBN</sub>-RSH<sub>HAT</sub>**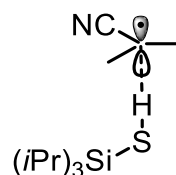

E = -1254.399538

G<sub>Corr.</sub> = 0.322625

|   |            |             |             |
|---|------------|-------------|-------------|
| C | 3.59663300 | -1.70492800 | -0.56054200 |
| H | 3.53256200 | -1.72941100 | -1.65278600 |
| H | 4.64244600 | -1.87758600 | -0.27175100 |



|    |             |             |             |
|----|-------------|-------------|-------------|
| H  | 2.99071800  | -2.52234900 | -0.15372600 |
| C  | 2.99574100  | -0.29252800 | 1.49447200  |
| H  | 2.62438800  | 0.68572700  | 1.81626200  |
| H  | 2.32748300  | -1.07567500 | 1.87164100  |
| H  | 3.98216400  | -0.44787500 | 1.95462900  |
| C  | 3.62791300  | 0.77782000  | -0.65376800 |
| N  | 4.00769600  | 1.73965100  | -1.19387300 |
| C  | 3.11869900  | -0.38977800 | -0.00269400 |
| H  | 1.76928500  | -0.39025300 | -0.49958500 |
| Si | -1.05858100 | 0.06509200  | 0.01578500  |
| S  | 0.50252100  | -0.58491500 | -1.36796000 |
| C  | -0.32379000 | 1.37030400  | 1.18582800  |
| C  | -1.36578600 | 1.89516800  | 2.17622800  |
| C  | 0.34749000  | 2.53082400  | 0.45481100  |
| H  | 0.44623100  | 0.83377600  | 1.76476100  |
| H  | -1.86715500 | 1.09391100  | 2.73478800  |
| H  | -0.89829200 | 2.56514800  | 2.91103600  |
| H  | -2.14074800 | 2.47974500  | 1.66077800  |
| H  | 1.12202300  | 2.20025000  | -0.24850100 |
| H  | -0.38492100 | 3.11308500  | -0.12176100 |
| H  | 0.81650200  | 3.22230800  | 1.16919500  |
| C  | -2.43497000 | 0.80598400  | -1.07444900 |
| C  | -3.78715700 | 0.79855700  | -0.35594700 |
| C  | -2.56658200 | 0.16517200  | -2.45621100 |
| H  | -2.12915800 | 1.85659200  | -1.21999500 |
| H  | -3.74986300 | 1.25925400  | 0.63897400  |
| H  | -4.53727900 | 1.34607500  | -0.94330400 |
| H  | -4.16481900 | -0.22541100 | -0.22986800 |
| H  | -1.64555300 | 0.25432900  | -3.04416500 |
| H  | -2.81209000 | -0.90353100 | -2.38527900 |
| H  | -3.37336100 | 0.64542800  | -3.02756600 |
| C  | -1.66329500 | -1.43663700 | 1.01112100  |
| C  | -0.56966400 | -1.98943300 | 1.92302200  |
| C  | -2.21362000 | -2.54481200 | 0.11411900  |
| H  | -2.48621000 | -1.06303000 | 1.64511100  |
| H  | -0.20279600 | -1.24676300 | 2.64388200  |
| H  | -0.93614800 | -2.85134500 | 2.49790100  |
| H  | 0.28898800  | -2.34037500 | 1.32985800  |
| H  | -3.06783800 | -2.21361700 | -0.48969800 |
| H  | -1.44113900 | -2.91028200 | -0.57707000 |
| H  | -2.54917100 | -3.40260700 | 0.71377400  |

### TS II<sub>AIBN</sub>-RSH<sub>HAT</sub>

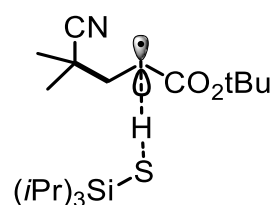

$$E = -1678.708917$$

$$G_{\text{Corr.}} = 0.493034$$

|   |            |             |             |
|---|------------|-------------|-------------|
| C | 3.06590600 | -2.37696300 | 0.33015500  |
| C | 1.92469100 | -1.76172800 | -0.52825400 |
| H | 2.27838200 | -1.62072700 | -1.55778200 |
| H | 1.09655900 | -2.48522200 | -0.56355100 |
| C | 1.44310200 | -0.44803200 | -0.00579700 |
| H | 1.07049500 | -0.39039800 | 1.02014400  |
| C | 2.07318900 | 0.78730000  | -0.52263100 |
| O | 2.68666700 | 0.83388300  | -1.57250200 |
| O | 1.84607300 | 1.81535800  | 0.29974800  |
| C | 2.37021900 | 3.15982900  | 0.00257400  |
| C | 3.88855500 | 3.11768100  | -0.03818500 |
| C | 1.76029000 | 3.67802500  | -1.28816900 |
| C | 1.89477700 | 3.97632400  | 1.18980900  |
| H | 4.28046900 | 2.66446800  | 0.88082500  |
| H | 4.25954800 | 2.55683300  | -0.89966500 |
| H | 4.27256300 | 4.14285200  | -0.09997400 |
| H | 0.66568100 | 3.61664800  | -1.24602800 |
| H | 2.03553000 | 4.73202700  | -1.41417300 |

|    |             |             |             |
|----|-------------|-------------|-------------|
| H  | 2.11268200  | 3.11967500  | -2.15890100 |
| H  | 2.23631600  | 5.01235200  | 1.08656900  |
| H  | 0.80044400  | 3.97620900  | 1.24864200  |
| H  | 2.29639400  | 3.56961100  | 2.12493000  |
| H  | 0.13833400  | -0.29841100 | -0.70728600 |
| S  | -1.06379100 | -0.17956900 | -1.59810800 |
| Si | -2.53804700 | -0.13010400 | 0.01511400  |
| C  | -1.95636200 | 1.13655500  | 1.30954100  |
| C  | -4.16248100 | 0.42482300  | -0.81234000 |
| C  | -2.68758900 | -1.85001100 | 0.80936500  |
| C  | -2.91469300 | 1.21243100  | 2.50014300  |
| C  | -1.73288100 | 2.52447000  | 0.71573000  |
| H  | -0.98227400 | 0.76782700  | 1.67574000  |
| C  | -5.38367600 | 0.00062000  | 0.00836100  |
| C  | -4.32082500 | -0.02060300 | -2.26619100 |
| H  | -4.11145500 | 1.52713600  | -0.80353800 |
| C  | -1.42574800 | -2.24356600 | 1.57509400  |
| C  | -3.04731600 | -2.93458900 | -0.20478700 |
| H  | -3.51649700 | -1.76246700 | 1.53334700  |
| H  | -3.10737600 | 0.23416200  | 2.95934300  |
| H  | -2.51107300 | 1.86958900  | 3.28279300  |
| H  | -3.88348000 | 1.63564300  | 2.19879500  |
| H  | -0.97590800 | 2.51120300  | -0.07875600 |
| H  | -2.65941900 | 2.93570300  | 0.29062700  |
| H  | -1.39798700 | 3.22765500  | 1.49221900  |
| H  | -5.32488400 | 0.30967800  | 1.05951300  |
| H  | -6.29955600 | 0.43882300  | -0.41166900 |
| H  | -5.51472400 | -1.09005500 | -0.00689300 |
| H  | -3.52027400 | 0.36361000  | -2.90975400 |
| H  | -4.32015200 | -1.11540900 | -2.35729300 |
| H  | -5.27517800 | 0.33870600  | -2.67606300 |
| H  | -1.15311000 | -1.52209100 | 2.35669100  |
| H  | -1.54851300 | -3.22259300 | 2.05901400  |
| H  | -0.57068500 | -2.33520600 | 0.88916200  |
| H  | -3.99421400 | -2.73299000 | -0.72097700 |
| H  | -2.26648900 | -3.02676600 | -0.97277000 |
| H  | -3.14337100 | -3.91285300 | 0.28663500  |
| C  | 2.56066300  | -2.79668500 | 1.71528300  |
| H  | 2.22978800  | -1.91638700 | 2.27837400  |
| H  | 1.72156800  | -3.49759900 | 1.63860200  |
| H  | 3.36121500  | -3.27843500 | 2.28679500  |
| C  | 4.25457800  | -1.41786600 | 0.45940400  |
| H  | 4.60635100  | -1.08163900 | -0.52167200 |
| H  | 3.95763700  | -0.53653300 | 1.04297300  |
| H  | 5.08440600  | -1.90241700 | 0.98475600  |
| C  | 3.51869900  | -3.58611700 | -0.37402400 |
| N  | 3.87500900  | -4.54470800 | -0.92572400 |

### I<sub>1</sub>

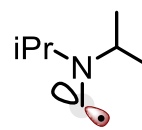

$$E = -330.9147445$$

$$G_{\text{Corr.}} = 0.181814$$

$$H_{\text{Corr.}} = 0.229483$$

|   |             |              |             |
|---|-------------|--------------|-------------|
| N | -0.00329100 | -0.02526600  | 0.60616200  |
| C | -0.38031000 | -0.72650500  | 1.73450600  |
| H | 0.34202200  | -0.77248800  | 2.54550300  |
| H | -1.43760300 | -0.297363500 | 1.98198700  |
| C | -0.98558000 | 0.18542300   | -0.46127700 |
| C | -1.95972800 | 1.29401500   | -0.08094000 |
| C | -1.72225700 | -1.09022800  | -0.86081200 |
| H | -0.41779800 | 0.52678800   | -1.33757500 |
| H | -1.42310200 | 2.22438600   | 0.13829400  |
| H | -2.66955800 | 1.48313900   | -0.89521400 |
| H | -2.53739600 | 1.01724400   | 0.81018200  |
| H | -1.02073100 | -1.89731000  | -1.09993800 |
| H | -2.37802200 | -1.44147200  | -0.05513500 |

|   |             |             |             |
|---|-------------|-------------|-------------|
| H | -2.34732400 | -0.90135100 | -1.74168600 |
| C | 1.42185000  | 0.01874000  | 0.27326100  |
| C | 1.83774600  | 1.38638800  | -0.24975800 |
| C | 1.83526600  | -1.10315300 | -0.67387800 |
| H | 1.93966300  | -0.14023200 | 1.23041200  |
| H | 1.54381300  | 2.17809000  | 0.44856100  |
| H | 2.92578800  | 1.42406300  | -0.37882700 |
| H | 1.38883700  | 1.60699500  | -1.22673400 |
| H | 1.53269300  | -2.07740400 | -0.27172800 |
| H | 1.37680200  | -0.97878800 | -1.66414800 |
| H | 2.92303400  | -1.10923800 | -0.81371200 |

## I<sub>2</sub>

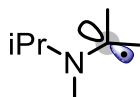

$$E = -330.9165137$$

$$G_{\text{Corr.}} = 0.182447$$

$$H_{\text{Corr.}} = 0.230161$$

|   |             |             |             |
|---|-------------|-------------|-------------|
| N | -0.05519800 | 0.38671900  | -0.27843000 |
| C | 0.09915000  | 1.76539500  | 0.15530400  |
| H | 1.06304500  | 2.15656000  | -0.17888100 |
| H | -0.67438000 | 2.39655300  | -0.29083200 |
| H | 0.04173200  | 1.87916600  | 1.25330900  |
| C | -1.28020000 | -0.22794100 | 0.04823700  |
| C | -2.49262800 | 0.64257300  | 0.09647300  |
| C | -1.47000800 | -1.65597300 | -0.35064600 |
| H | -2.71498800 | 1.11629900  | -0.88077700 |
| H | -3.36929900 | 0.04558300  | 0.36729600  |
| H | -2.41903600 | 1.45722300  | 0.82794400  |
| H | -1.29544200 | -1.81994400 | -1.43149300 |
| H | -0.81353500 | -2.35931100 | 0.18117300  |
| H | -2.49893000 | -1.96470500 | -0.14040100 |
| C | 1.15776500  | -0.43828900 | -0.13536900 |
| C | 1.54563300  | -0.65889800 | 1.32374400  |
| C | 2.32563600  | 0.11002000  | -0.94228000 |
| H | 0.90857200  | -1.41094800 | -0.57618200 |
| H | 0.69612500  | -1.04663400 | 1.90022400  |
| H | 2.37377400  | -1.37357800 | 1.40103100  |
| H | 1.87348100  | 0.27922800  | 1.79097700  |
| H | 2.01462600  | 0.36443300  | -1.96191800 |
| H | 2.77364800  | 0.99983500  | -0.48268600 |
| H | 3.11490600  | -0.64811300 | -1.00255800 |

## TS I<sub>1</sub>-I<sub>2</sub>

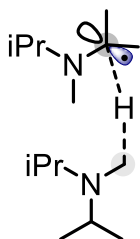

$$E = -662.4573924$$

$$G_{\text{Corr.}} = 0.394573$$

|   |             |             |             |
|---|-------------|-------------|-------------|
| N | -2.52781100 | 0.25128700  | 0.56081200  |
| C | -2.19302400 | -0.85408100 | 1.44516400  |
| H | -3.06278400 | -1.49842900 | 1.59619500  |
| H | -1.36423900 | -1.47853800 | 1.06102300  |
| H | -1.89846800 | -0.48308700 | 2.43175400  |
| C | -1.39378400 | 1.08862600  | 0.25289000  |
| C | -0.70622100 | 1.61847400  | 1.49226700  |
| C | -1.66937500 | 2.18718800  | -0.74610600 |

|   |             |             |             |
|---|-------------|-------------|-------------|
| H | -0.40577400 | 0.33869600  | -0.33693100 |
| H | -0.23130900 | 0.83173300  | 2.09053200  |
| H | 0.08860200  | 2.31795700  | 1.20594400  |
| H | -1.41744200 | 2.15913200  | 2.13944000  |
| H | -1.91158300 | 1.81396000  | -1.74898800 |
| H | -2.49538600 | 2.84105500  | -0.41938200 |
| H | -0.77482300 | 2.81300100  | -0.84879500 |
| C | -3.39601500 | -0.12365900 | -0.56733800 |
| C | -4.73362000 | -0.67467400 | -0.08976400 |
| C | -2.74530500 | -1.07759800 | -1.56737800 |
| H | -3.62509700 | 0.81347600  | -1.08992200 |
| H | -5.15315200 | -0.04893700 | 0.70613800  |
| H | -5.44255000 | -0.69068500 | -0.92575600 |
| H | -4.65689800 | -1.70429400 | 0.28184000  |
| H | -1.82300700 | -0.65948900 | -1.98790100 |
| H | -2.49726800 | -2.03754000 | -1.09431800 |
| H | -3.43217800 | -1.28646200 | -2.39696000 |
| C | 0.68029000  | -0.35607500 | -0.88569000 |
| N | 1.82998300  | -0.13888600 | -0.09253300 |
| H | 0.73351700  | 0.03454800  | -1.91796500 |
| H | 0.34511100  | -1.39735200 | -0.88106200 |
| C | 2.50499400  | 1.13897600  | -0.29850300 |
| C | 2.61154200  | -1.29356700 | 0.35554400  |
| C | 3.52265900  | 1.12074400  | -1.43867500 |
| C | 3.13076800  | 1.67390900  | 0.98342800  |
| H | 1.69788200  | 1.83589400  | -0.57953600 |
| C | 3.01260100  | -2.25112800 | -0.76691000 |
| C | 1.87832200  | -2.03594300 | 1.46670100  |
| H | 3.53630800  | -0.88626600 | 0.78871500  |
| H | 3.07628200  | 0.73456800  | -2.36354800 |
| H | 3.90153400  | 2.13068600  | -1.63930200 |
| H | 4.38474300  | 0.48934000  | -1.18384800 |
| H | 2.40607000  | 1.66130000  | 1.80634700  |
| H | 4.00631500  | 1.08680800  | 1.28933300  |
| H | 3.47283800  | 2.70537100  | 0.83555900  |
| H | 3.52224500  | -1.72533200 | -1.58232300 |
| H | 3.68765300  | -3.02673000 | -0.38434300 |
| H | 2.13516400  | -2.75743100 | -1.18939500 |
| H | 1.65629000  | -1.35959400 | 2.30131900  |
| H | 0.92627000  | -2.44624800 | 1.10186900  |
| H | 2.47695200  | -2.87508100 | 1.84252500  |

## TS I<sub>1</sub>-II<sub>1</sub>

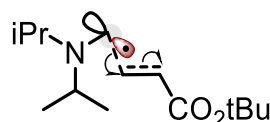

$$E = -755.1912092$$

$$G_{\text{Corr.}} = 0.345368$$

|   |             |             |             |
|---|-------------|-------------|-------------|
| C | -2.66806400 | 2.54434400  | -0.46621700 |
| C | -2.89849500 | 1.29457400  | 0.37384800  |
| H | -3.92310400 | 1.33878500  | 0.76679500  |
| H | -3.38077600 | 2.59362000  | -1.29767800 |
| H | -2.78535000 | 3.44476200  | 0.14776000  |
| H | -1.65348300 | 2.55647900  | -0.88371200 |
| C | -1.94447000 | 1.23325400  | 1.56196700  |
| H | -2.14440800 | 0.35553500  | 2.18796900  |
| H | -0.89629900 | 1.19047500  | 1.23843300  |
| H | -2.06665400 | 2.12816600  | 2.18338400  |
| N | -2.84069700 | 0.08901600  | -0.46365700 |
| C | -3.97958300 | -0.83271800 | -0.47647000 |
| C | -5.23680000 | -0.16670300 | -1.01743200 |
| C | -4.21200500 | -1.47203300 | 0.88762600  |
| H | -3.69260600 | -1.62877500 | -1.17860100 |
| H | -5.05329100 | 0.27283600  | -2.00415100 |
| H | -6.04194500 | -0.90457200 | -1.11115900 |
| H | -5.59885500 | 0.62579900  | -0.35017700 |
| H | -3.30005000 | -1.96162600 | 1.24891300  |
| H | -4.52067200 | -0.72580400 | 1.63149000  |
| H | -5.00733600 | -2.22435000 | 0.82668400  |
| C | -1.64575700 | -0.33045100 | -0.97012200 |

|   |             |             |             |
|---|-------------|-------------|-------------|
| H | -1.67225900 | -1.10837400 | -1.72864000 |
| H | -0.82636900 | 0.38225500  | -0.99832100 |
| C | -0.13269700 | -1.83770900 | 0.48265000  |
| H | -0.44170300 | -1.12872700 | 1.24585900  |
| H | -0.78430600 | -2.68679000 | 0.29518700  |
| C | 1.10890500  | -1.76963100 | -0.05245400 |
| H | 1.47848700  | -2.51582200 | -0.75186500 |
| C | 1.98110600  | -0.63936700 | 0.24783400  |
| O | 1.66889400  | 0.32669000  | 0.93136300  |
| O | 3.18681700  | -0.79353000 | -0.34119900 |
| C | 4.24812800  | 0.19954600  | -0.20356300 |
| C | 3.81384200  | 1.52538700  | -0.80756100 |
| C | 4.66120100  | 0.33449300  | 1.25319200  |
| C | 5.38105100  | -0.40236300 | -1.01748300 |
| H | 3.46515400  | 1.37678700  | -1.83677100 |
| H | 3.01575000  | 1.99212100  | -0.22523600 |
| H | 4.67259800  | 2.20742000  | -0.83512500 |
| H | 4.91054300  | -0.64926000 | 1.66887400  |
| H | 5.55526300  | 0.96691100  | 1.31688700  |
| H | 3.87010400  | 0.78524400  | 1.85733700  |
| H | 6.25410900  | 0.25992400  | -0.99179600 |
| H | 5.67177700  | -1.37790900 | -0.61111600 |
| H | 5.07669500  | -0.53724400 | -2.06182200 |

### TS I<sub>2</sub>-II<sub>2</sub>

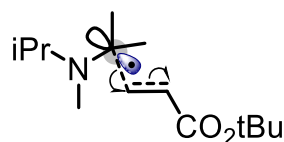

$$E = -755.1957426$$

$$G_{\text{Corr.}} = 0.34776$$

|   |             |             |             |
|---|-------------|-------------|-------------|
| N | 2.74557800  | 0.16570900  | 0.12164700  |
| C | 1.98792400  | 1.43139300  | 0.16653100  |
| C | 1.80465500  | 2.06234400  | -1.20800900 |
| C | 2.63456700  | 2.40066500  | 1.14720200  |
| H | 0.98369700  | 1.18329400  | 0.52503700  |
| H | 1.35432600  | 1.35550200  | -1.91260600 |
| H | 1.11715500  | 2.91135400  | -1.12026200 |
| H | 2.74630000  | 2.44200200  | -1.62350300 |
| H | 2.69481700  | 1.96472600  | 2.15087600  |
| H | 3.65206500  | 2.66643400  | 0.83050000  |
| H | 2.05413800  | 3.32924900  | 1.20667100  |
| C | 2.18972800  | -1.02441500 | 0.54479400  |
| C | 0.71780600  | -1.75225200 | -1.23739400 |
| H | 1.06598800  | -0.86643200 | -1.76511900 |
| H | 1.28954800  | -2.66615200 | -1.37573700 |
| C | -0.56634500 | -1.80366600 | -0.77515500 |
| H | -0.98404500 | -2.71577600 | -0.35344000 |
| C | -1.37532400 | -0.60315300 | -0.69553800 |
| O | -1.03598300 | 0.50710400  | -1.09319600 |
| O | -2.56698700 | -0.85503700 | -0.09746000 |
| C | -3.50223000 | 0.21637500  | 0.21876300  |
| C | -2.85768500 | 1.20389100  | 1.18050200  |
| C | -4.00451300 | 0.88624000  | -1.05074800 |
| C | -4.64095800 | -0.51734400 | 0.90735000  |
| H | -2.47297800 | 0.67485800  | 2.06181100  |
| H | -2.03752400 | 1.75129700  | 0.70698200  |
| H | -3.61075700 | 1.92559100  | 1.52032800  |
| H | -4.39833600 | 0.13301200  | -1.74383100 |
| H | -4.82060800 | 1.57457700  | -0.79777000 |
| H | -3.21231200 | 1.44780000  | -1.55118600 |
| H | -5.42112800 | 0.19325100  | 1.20425400  |
| H | -5.08422200 | -1.25899300 | 0.23280500  |
| H | -4.28072600 | -1.03473700 | 1.80405800  |
| C | 3.92520200  | 0.15367400  | -0.72110000 |
| H | 3.70555100  | -0.17286100 | -1.75163200 |
| H | 4.35019800  | 1.15959600  | -0.77076500 |
| H | 4.69815100  | -0.50003100 | -0.30859900 |
| C | 1.19282200  | -0.97118900 | 1.65998000  |
| H | 0.26747300  | -0.44040300 | 1.40172300  |

|   |            |             |             |
|---|------------|-------------|-------------|
| H | 0.89957800 | -1.98737400 | 1.94098300  |
| H | 1.62092100 | -0.48081200 | 2.54913300  |
| C | 3.07757400 | -2.23082800 | 0.52927800  |
| H | 3.89552900 | -2.13881000 | 1.26576900  |
| H | 2.49573600 | -3.11847700 | 0.79664600  |
| H | 3.53685600 | -2.41860800 | -0.44814600 |

### II<sub>1</sub>

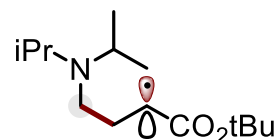

$$E = -755.2202148$$

$$G_{\text{Corr.}} = 0.349125$$

|   |             |             |             |
|---|-------------|-------------|-------------|
| C | 4.32196800  | -1.06716100 | 1.44898300  |
| C | 3.62280300  | -1.12702500 | 0.09050100  |
| H | 3.04012600  | -2.06197400 | 0.06526700  |
| H | 3.59820500  | -1.00987400 | 2.27171700  |
| H | 4.93750400  | -1.96195600 | 1.60411500  |
| H | 4.98706600  | -0.19578900 | 1.51504300  |
| C | 4.63639400  | -1.20948800 | -1.04330900 |
| H | 4.12599000  | -1.29723600 | -2.00937800 |
| H | 5.27948800  | -0.32027300 | -1.07798700 |
| H | 5.29293700  | -2.07826800 | -0.91220400 |
| N | 2.64582800  | -0.06400900 | -0.14279700 |
| C | 3.09816600  | 1.32690900  | -0.07157500 |
| C | 2.91637500  | 2.00541500  | 1.28898900  |
| C | 2.43328900  | 2.14731200  | -1.17076600 |
| H | 4.17715300  | 1.30310100  | -0.28417600 |
| H | 3.33982800  | 1.40946500  | 2.10477300  |
| H | 3.41192000  | 2.98420200  | 1.29084400  |
| H | 1.85652900  | 2.18281500  | 1.51332300  |
| H | 2.65582700  | 1.72122700  | -2.15603300 |
| H | 1.34113100  | 2.15545800  | -1.04677400 |
| H | 2.77627300  | 3.18937800  | -1.15060600 |
| C | 1.31399200  | -0.34475200 | 0.33582300  |
| H | 1.32272900  | -0.90624600 | 1.29004500  |
| H | 0.78215900  | 0.59285200  | 0.53930900  |
| C | 0.47980000  | -1.12677500 | -0.70874100 |
| H | 0.44733900  | -0.50640700 | -1.61464600 |
| H | 0.99861600  | -0.83032800 | -0.95199400 |
| C | -0.88792100 | -1.40108100 | -0.22590300 |
| H | -1.13257500 | -2.31969900 | 0.30443900  |
| C | -1.92113600 | -0.38921200 | -0.34043800 |
| O | -1.74632200 | 0.70887300  | -0.85419100 |
| O | -3.08397100 | -0.81410000 | 0.19120200  |
| C | -4.28150300 | 0.02832000  | 0.19936200  |
| C | -4.03108900 | 1.28848000  | 1.01146100  |
| C | -4.71753800 | 0.33161200  | -1.22456500 |
| C | -5.30727700 | -0.85228500 | 0.89086300  |
| H | -3.65974400 | 1.02908300  | 2.01017900  |
| H | -3.31002700 | 1.94901700  | 0.52337000  |
| H | -4.97667300 | 1.83107100  | 1.13145900  |
| H | -4.82691700 | -0.59876700 | -1.79459600 |
| H | -5.69304900 | 0.83241000  | -1.20180700 |
| H | -4.00494900 | 0.98218500  | -1.73756200 |
| H | -6.26590900 | -0.32555500 | 0.95946800  |
| H | -5.46016200 | -1.78107800 | 0.32948200  |
| H | -4.97719500 | -1.10759400 | 1.90430300  |

### II<sub>2</sub>

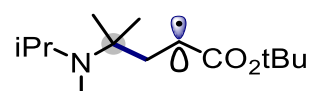

$$E = -755.2202026$$

$G_{\text{Corr.}} = 0.349915$

|   |             |             |             |
|---|-------------|-------------|-------------|
| N | -2.93918200 | -0.41215300 | 0.39310700  |
| C | -4.08627200 | 0.38381700  | -0.07267500 |
| C | -5.39704300 | -0.33748200 | 0.22654400  |
| C | -4.05501500 | 0.80243100  | -1.54569700 |
| H | -4.09830200 | 1.29650400  | 0.53484500  |
| H | -5.40305900 | -0.73462500 | 1.24807600  |
| H | -6.23314600 | 0.36362500  | 0.12381000  |
| H | -5.58370500 | -1.16507600 | -0.46959100 |
| H | -3.24443400 | 1.50570800  | -1.76661100 |
| H | -3.94285600 | -0.06565700 | -2.20837000 |
| H | -4.99712900 | 1.29730500  | -1.81273100 |
| C | -1.63055800 | 0.23443400  | 0.58874500  |
| C | -0.77171800 | 0.23124800  | -0.73431100 |
| H | -0.68325500 | -0.80359000 | -1.08672200 |
| H | -1.32694700 | 0.80632300  | -1.48739500 |
| C | 0.57852500  | 0.79487400  | -0.57501200 |
| H | 0.73615700  | 1.87097200  | -0.51724400 |
| C | 1.74527800  | -0.05729200 | -0.45128400 |
| O | 1.72112700  | -1.27884200 | -0.53233100 |
| O | 2.85719700  | 0.67427400  | -0.23041900 |
| C | 4.15820500  | 0.04338000  | -0.00647100 |
| C | 4.10366800  | -0.83655900 | 1.23215000  |
| C | 4.59332800  | -0.72168000 | -1.24557300 |
| C | 5.07314900  | 1.23237000  | 0.22900000  |
| H | 3.71646100  | -0.26583700 | 2.08534900  |
| H | 3.47357800  | -1.71618900 | 1.07763300  |
| H | 5.11797500  | -1.17206000 | 1.48019300  |
| H | 4.56114600  | -0.06813800 | -2.12558300 |
| H | 5.62773300  | -1.06146300 | -1.11268000 |
| H | 3.96037600  | -1.59390700 | -1.42632700 |
| H | 6.09701500  | 0.88596500  | 0.41026900  |
| H | 5.07947600  | 1.89366300  | -0.64503800 |
| H | 4.74140300  | 1.80896600  | 1.10007400  |
| C | -2.89313900 | -1.74811800 | -0.17272500 |
| H | -2.04082500 | -2.30478700 | 0.22390600  |
| H | -3.79062500 | -2.31101400 | 0.10461900  |
| H | -2.81340700 | -1.76934200 | -1.27537500 |
| C | -0.86718700 | -0.52255900 | 1.68119500  |
| H | -0.60709100 | -1.54595500 | 1.39257800  |
| H | 0.07516400  | -0.00911300 | 1.91366300  |
| H | -1.47524300 | -0.55994500 | 2.59255900  |
| C | -1.80190600 | 1.67136200  | 1.07368800  |
| H | -2.45128800 | 1.70442800  | 1.95725300  |
| H | -0.82697500 | 2.07627400  | 1.36623800  |
| H | -2.21642100 | 2.33723600  | 0.30739600  |

**TS II<sub>1</sub>-I<sub>1</sub>**

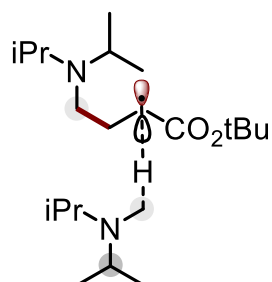

$E = -1086.774624$

$G_{\text{Corr.}} = 0.56314$

|   |             |             |             |
|---|-------------|-------------|-------------|
| C | -4.48661400 | 0.23573900  | 0.82282500  |
| N | -3.89313000 | -0.17282300 | -0.44696000 |
| C | -4.31623500 | -1.43049300 | -1.04808300 |
| C | -5.75741700 | -1.34993500 | -1.54573600 |
| C | -4.12756100 | -2.66200700 | -0.15852600 |
| H | -3.67461200 | -1.55914400 | -1.93526400 |
| H | -5.88190600 | -0.50482100 | -2.23221900 |
| H | -6.04502100 | -2.27146800 | -2.06745000 |
| H | -6.46005600 | -1.21425200 | -0.71237300 |

|   |             |             |             |
|---|-------------|-------------|-------------|
| H | -3.08930800 | -2.76325400 | 0.17777800  |
| H | -4.76694700 | -2.60466200 | 0.73301000  |
| H | -4.40363800 | -3.57657000 | -0.69894300 |
| C | -2.58786500 | 0.33151500  | -0.80421400 |
| C | -1.36687800 | -0.52721600 | -0.43108000 |
| H | -1.35806500 | -0.71778900 | 0.65120900  |
| H | -1.44739700 | -1.50555900 | -0.93079200 |
| C | -0.07208900 | 0.12410800  | -0.83392700 |
| H | 0.07308900  | 0.26713800  | -1.90981500 |
| C | 0.36113800  | 1.26584300  | -0.03615800 |
| O | -0.01043800 | 1.50964900  | 1.10594900  |
| O | 1.27581500  | 2.01418400  | -0.70440400 |
| C | 1.84883000  | 3.22818100  | -0.13319500 |
| C | 0.75523000  | 4.25001200  | 0.13649200  |
| C | 2.65719800  | 2.91069300  | 1.11500000  |
| C | 2.76650900  | 3.72290400  | -1.23916700 |
| H | 0.15516600  | 4.40899900  | -0.76778400 |
| H | 0.09664300  | 3.93060100  | 0.94794100  |
| H | 1.21416600  | 5.20732300  | 0.41274500  |
| H | 3.41523100  | 2.14788800  | 0.89422700  |
| H | 3.17882500  | 3.81723200  | 1.44635500  |
| H | 2.01976500  | 2.55621600  | 1.92933400  |
| H | 3.26266700  | 4.64975400  | -0.92849200 |
| H | 3.53708900  | 2.97652400  | -1.46702900 |
| H | 2.19547100  | 3.92301600  | -2.15311800 |
| N | 2.76885100  | -2.14776100 | -0.18791100 |
| C | 3.10643600  | -2.03036300 | 1.23703100  |
| H | 4.16939700  | -1.75684200 | 1.27846000  |
| C | 1.42441000  | -2.14244700 | -0.55099800 |
| H | 0.85139000  | -0.92032300 | -0.62154200 |
| C | 3.74002300  | -1.69568700 | -1.18779900 |
| C | 5.02936200  | -2.50182000 | -1.11836800 |
| C | 4.00283900  | -0.19467900 | -1.11838800 |
| H | 3.26660900  | -1.91028300 | -2.15775100 |
| H | 4.82361200  | -3.57645700 | -1.17759800 |
| H | 5.68702500  | -2.22786400 | -1.95132500 |
| H | 5.58425000  | -2.30878500 | -0.19141000 |
| H | 3.06925200  | 0.37800000  | -1.19026600 |
| H | 4.50221400  | 0.07608700  | -0.17717400 |
| H | 4.66065000  | 0.11632400  | -1.93953800 |
| H | -5.35896300 | -0.41786800 | 0.97326200  |
| H | 0.77076800  | -2.63976700 | 0.17438200  |
| H | 1.25354600  | -2.50959600 | -1.56973200 |
| C | 2.94594400  | -3.37700300 | 1.93154400  |
| H | 3.56678600  | -4.14072200 | 1.44932800  |
| H | 3.23625100  | -3.30523700 | 2.98648400  |
| H | 1.90185200  | -3.71438100 | 1.89679200  |
| C | 2.31928700  | -0.93674600 | 1.94971200  |
| H | 2.42973900  | 0.03297600  | 1.45140600  |
| H | 1.24732500  | -1.16866800 | 1.99101800  |
| H | 2.67373200  | -0.83175400 | 2.98179700  |
| C | -3.57953300 | 0.06491300  | 2.04207600  |
| H | -2.68988300 | 0.70500700  | 1.97153200  |
| H | -4.11646100 | 0.34697000  | 2.95679800  |
| H | -3.24417900 | -0.97328400 | 2.15220100  |
| C | -5.01371500 | 1.66612100  | 0.74342700  |
| H | -5.72515200 | 1.76617700  | -0.08495400 |
| H | -5.51633600 | 1.95474700  | 1.67542400  |
| H | -4.19604400 | 2.38025500  | 0.57722400  |
| H | -2.46341100 | 1.32537300  | -0.35070800 |
| H | -2.55398400 | 0.49635900  | -1.89648400 |

**TS II<sub>1</sub>-I<sub>2</sub>**

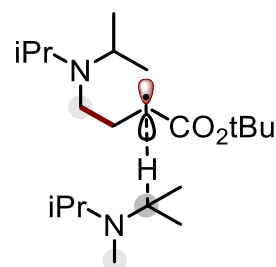

E = -1086.773119

G<sub>Corr.</sub> = 0.563542

|   |             |             |             |
|---|-------------|-------------|-------------|
| C | 4.91553700  | -2.10327000 | -0.22837900 |
| C | 4.53119400  | -0.76743100 | 0.40208700  |
| H | 5.46919100  | -0.23656500 | 0.62350400  |
| H | 5.49732600  | -1.94127700 | -1.14356200 |
| H | 5.51171600  | -2.71059100 | 0.46452100  |
| H | 4.02345800  | -2.68718400 | -0.49174900 |
| C | 3.81283300  | -0.98952600 | 1.73371400  |
| H | 3.58773200  | -0.03978400 | 2.23343600  |
| H | 2.86908400  | -1.53342000 | 1.59270700  |
| H | 4.43972200  | -1.58722200 | 2.40764400  |
| N | 3.81149400  | 0.07101300  | -0.55280000 |
| C | 4.25290900  | 1.44513800  | -0.75337900 |
| C | 5.60523100  | 1.49417400  | -1.46023700 |
| C | 4.28290800  | 2.30230100  | 0.51490000  |
| H | 3.51354500  | 1.89061000  | -1.43911900 |
| H | 5.56980200  | 0.93106800  | -2.39973800 |
| H | 5.89537600  | 2.52896400  | -1.68161600 |
| H | 6.39771500  | 1.05983300  | -0.83584000 |
| H | 3.30857200  | 2.31910800  | 1.01733300  |
| H | 5.02469100  | 1.92069500  | 1.22970600  |
| H | 4.56274000  | 3.33644400  | 0.27645700  |
| C | 2.43158400  | -0.23370800 | -0.84774800 |
| H | 2.23378200  | -0.00780800 | -1.91111500 |
| H | 2.28339800  | -1.31763600 | -0.74109000 |
| C | 1.35297700  | 0.48708300  | -0.01664000 |
| H | 1.51161100  | 0.28894900  | 1.05224000  |
| H | 1.45237300  | 1.57303700  | -0.16485400 |
| C | -0.03373900 | 0.06573000  | -0.40781900 |
| H | -0.35348800 | 0.32873500  | -1.42177300 |
| C | -0.49163100 | -1.25217900 | 0.02606500  |
| O | 0.03266600  | -1.92346500 | 0.90618100  |
| O | -1.62636700 | -1.60504600 | -0.62121700 |
| C | -2.37983000 | -2.80179700 | -0.26155000 |
| C | -1.55739400 | -4.04769700 | -0.54808800 |
| C | -2.83812200 | -2.72955100 | 1.18658500  |
| C | -3.58413000 | -2.73712100 | -1.18567700 |
| H | -1.21315400 | -4.04198800 | -1.58936400 |
| H | -0.68941900 | -4.11555100 | 0.11250800  |
| H | -2.18184300 | -4.93754700 | -0.40093800 |
| H | -3.38111800 | -1.79068000 | 1.36135300  |
| H | -3.52680600 | -3.55916500 | 1.38872200  |
| H | -1.99918300 | -2.79371200 | 1.88429200  |
| H | -4.22304700 | -3.61434700 | -1.03108600 |
| H | -4.17523700 | -1.83478200 | -0.98362500 |
| H | -3.26642400 | -2.71708400 | -2.23501400 |
| N | -2.97530900 | 1.49945000  | 0.34139900  |
| C | -4.21832700 | 1.41070700  | 1.07754500  |
| H | -5.03107400 | 1.12423700  | 0.40076200  |
| H | -4.16379100 | 0.63932300  | 1.85232700  |
| H | -4.50415000 | 2.36086300  | 1.56704800  |
| C | -1.74677300 | 1.62610200  | 1.03858800  |
| C | -1.70155200 | 0.92914600  | 2.37415700  |
| C | -1.10175500 | 2.99965800  | 1.07758700  |
| H | -0.89930600 | 0.89367500  | 0.31732000  |
| H | -2.06046000 | -0.10552500 | 2.30775100  |
| H | -0.66616700 | 0.89817800  | 2.73376900  |
| H | -2.29726900 | 1.45413400  | 3.13676800  |
| H | -0.97530000 | 3.44292000  | 0.08320800  |
| H | -1.71873600 | 3.68927200  | 1.67780800  |
| H | -0.11131400 | 2.94364200  | 1.54623400  |
| C | -3.04548500 | 2.05256700  | -1.01321500 |
| C | -3.78506500 | 3.38585200  | -1.08887800 |
| C | -3.62635100 | 1.03610300  | -1.98865700 |
| H | -2.00308500 | 2.22503600  | -1.31768600 |
| H | -3.38426100 | 4.11230900  | -0.37174700 |
| H | -3.69715300 | 3.81328400  | -2.09473200 |
| H | -4.85539600 | 3.25950400  | -0.88018300 |
| H | -3.04082300 | 0.10866900  | -1.96617700 |
| H | -4.66888800 | 0.79207700  | -1.74277500 |
| H | -3.61873200 | 1.43845800  | -3.00931000 |

TS II<sub>2</sub>-I<sub>1</sub>

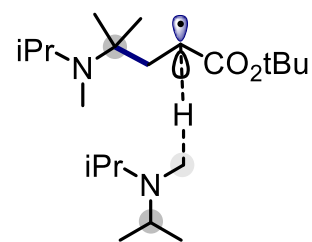

E = -1086.773998

G<sub>Corr.</sub> = 0.563736

|   |             |             |             |
|---|-------------|-------------|-------------|
| C | 4.25575300  | 0.32164100  | -1.53343100 |
| H | 3.43893300  | -0.01753100 | -2.19972300 |
| N | 4.07568300  | -0.01698000 | -0.13512100 |
| C | 4.44104300  | -1.40918600 | 0.17976200  |
| C | 5.93911900  | -1.50216500 | 0.44771700  |
| C | 4.01941900  | -2.45846500 | -0.85268200 |
| H | 3.93284600  | -1.66799700 | 1.11688300  |
| H | 6.22289200  | -0.83238000 | 1.26754900  |
| H | 6.23096300  | -2.52663600 | 0.71247300  |
| H | 6.51752500  | -1.21248400 | -0.43998600 |
| H | 2.95242700  | -2.39909500 | -1.09579900 |
| H | 4.58475600  | -2.36060200 | -1.78812300 |
| H | 4.21930400  | -3.46241800 | -0.45838900 |
| C | 2.86399100  | 0.52875500  | 0.52021500  |
| C | 1.60122000  | -0.29156500 | 0.14603600  |
| H | 1.55627600  | -0.39555900 | -0.94839600 |
| H | 1.72818900  | -1.30457100 | 0.56039100  |
| C | 0.28061800  | 0.25791000  | 0.61497000  |
| H | 0.19049100  | 0.45307600  | 1.68781900  |
| C | -0.36182900 | 1.26904000  | -0.21552700 |
| O | -0.24024800 | 1.36281900  | -1.43213600 |
| O | -1.16875300 | 2.07184000  | 0.52161900  |
| C | -1.87972600 | 3.20280800  | -0.06475800 |
| C | -0.88295100 | 4.20231000  | -0.63036300 |
| C | -2.88486700 | 2.73928900  | -1.10743600 |
| C | -2.60536800 | 3.79904200  | 1.12992400  |
| H | -0.14564300 | 4.47389100  | 0.13546000  |
| H | -0.35784700 | 3.79894000  | -1.50050100 |
| H | -1.41233500 | 5.11450600  | -0.93204600 |
| H | -3.56171200 | 1.98881700  | -0.67890700 |
| H | -3.49146700 | 3.59618700  | -1.42608300 |
| H | -2.39129700 | 2.31286200  | -1.98440800 |
| H | -3.18837000 | 4.67345100  | 0.81817900  |
| H | -3.28930700 | 3.06374200  | 1.57127600  |
| H | -1.89002800 | 4.11273300  | 1.89885600  |
| N | -2.35124200 | -2.27569500 | 0.08619200  |
| C | -2.61573800 | -2.29009600 | -1.35530100 |
| H | -1.66935500 | -2.61239900 | -1.81411200 |
| C | -1.03399000 | -2.13931900 | 0.51341600  |
| H | -0.54246700 | -0.87547900 | 0.49783800  |
| C | -3.43087000 | -1.89490900 | 1.00443400  |
| C | -3.19119800 | -0.54683600 | 1.67595300  |
| C | -3.67370500 | -2.99419200 | 2.03153900  |
| H | -4.33700700 | -1.80358400 | 0.39030400  |
| H | -2.97932000 | 0.24213100  | 0.94456700  |
| H | -4.07510700 | -0.25453400 | 2.25527100  |
| H | -2.34122200 | -0.58988100 | 2.36980100  |
| H | -3.91063500 | -3.94390700 | 1.53858000  |
| H | -2.78616600 | -3.14812400 | 2.65901600  |
| H | -4.50579600 | -2.72754900 | 2.69411600  |
| H | 4.36644500  | 1.40199300  | -1.66609900 |
| H | 5.18412000  | -0.13080400 | -1.89929000 |
| C | 3.07453000  | 0.51819500  | 2.03729500  |
| H | 3.12982700  | -0.49228300 | 2.45826700  |
| H | 4.00601900  | 1.04295200  | 2.28386900  |
| H | 2.24898800  | 1.03241200  | 2.54339000  |
| C | 2.69086400  | 1.99198000  | 0.10856800  |
| H | 2.38721400  | 2.10719400  | -0.93755600 |
| H | 1.91460900  | 2.46201000  | 0.72529600  |



|   |             |             |             |
|---|-------------|-------------|-------------|
| H | 3.62662500  | 2.54145500  | 0.27229900  |
| H | -0.31931700 | -2.65772300 | -0.13611300 |
| H | -0.88290300 | -2.39244400 | 1.56958400  |
| C | -2.95794400 | -0.91238900 | -1.91035400 |
| H | -2.15664900 | -0.19170900 | -1.70597700 |
| H | -3.09600500 | -0.96392800 | -2.99723700 |
| H | -3.89321200 | -0.53073200 | -1.47805300 |
| C | -3.67618600 | -3.32378700 | -1.71102300 |
| H | -3.40852600 | -4.31137000 | -1.31908500 |
| H | -4.66209500 | -3.05174600 | -1.31233300 |
| H | -3.77684600 | -3.39779600 | -2.79995600 |

### TS II<sub>2</sub>-I<sub>2</sub>

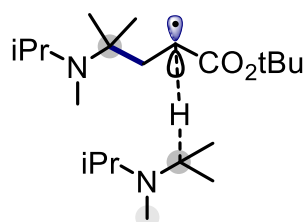

$$E = -1086.773233$$

$$G_{\text{Corr.}} = 0.564554$$

|   |             |             |             |
|---|-------------|-------------|-------------|
| C | 4.27937600  | 1.12658600  | -1.10834700 |
| H | 3.60752700  | 0.85698900  | -1.94623300 |
| N | 3.97226700  | 0.47163400  | 0.14841200  |
| C | 4.48002900  | -0.90970700 | 0.22537900  |
| C | 5.93333600  | -0.90121100 | 0.68634800  |
| C | 4.33128700  | -1.74732900 | -1.04833800 |
| H | 3.90143700  | -1.41853300 | 1.00635400  |
| H | 6.02360400  | -0.39747800 | 1.65556400  |
| H | 6.32348800  | -1.92259200 | 0.78229600  |
| H | 6.57270400  | -0.36937200 | -0.03108000 |
| H | 3.30211300  | -1.75666000 | -1.42671800 |
| H | 4.98264200  | -1.38457600 | -1.85352600 |
| H | 4.62184200  | -2.78455500 | -0.84081300 |
| C | 2.62498700  | 0.72550000  | 0.70913300  |
| C | 1.55088600  | -0.13515700 | -0.00781900 |
| H | 1.65046300  | 0.01528800  | -1.09275100 |
| H | 1.77979000  | -1.19241500 | 0.19657300  |
| C | 0.11915900  | 0.12768600  | 0.37086500  |
| H | -0.13220900 | 0.04481500  | 1.43275900  |
| C | -0.58819200 | 1.20314400  | -0.32361600 |
| O | -0.37059900 | 1.54073000  | -1.47993100 |
| O | -1.55646700 | 1.74418800  | 0.45033300  |
| C | -2.49367500 | 2.72789100  | -0.08712900 |
| C | -1.75303800 | 3.97792100  | -0.53767700 |
| C | -3.31837700 | 2.09715600  | -1.19840000 |
| C | -3.37645000 | 3.05340400  | 1.10628900  |
| H | -1.09672000 | 4.33483300  | 0.26643000  |
| H | -1.14947800 | 3.79361600  | -1.42912700 |
| H | -2.48003300 | 4.76905000  | -0.75920500 |
| H | -3.76383600 | 1.15702500  | -0.84597500 |
| H | -4.12993700 | 2.77843600  | -1.48242800 |
| H | -2.71060300 | 1.88914100  | -2.08351300 |
| H | -4.11803900 | 3.81011600  | 0.82528600  |
| H | -3.90979300 | 2.16188900  | 1.45627400  |
| H | -2.77481900 | 3.44729600  | 1.93368800  |
| N | -2.52226000 | -1.82761000 | -0.30799000 |
| C | -3.61600500 | -2.12892300 | -1.21019100 |
| H | -4.56519300 | -1.82799800 | -0.75394800 |
| H | -3.52102400 | -1.56786000 | -2.14501800 |
| H | -3.68812300 | -3.20351200 | -1.46273600 |
| C | -1.18569700 | -1.98949000 | -0.76186300 |
| C | -0.97947000 | -1.68448200 | -2.22346400 |
| C | -0.43805800 | -3.23339900 | -0.31731900 |
| H | -0.54241600 | -0.97805400 | -0.16105700 |
| H | -1.42418900 | -0.72277900 | -2.50537900 |
| H | 0.09477900  | -1.62599000 | -2.43683000 |
| H | -1.39772600 | -2.47212600 | -2.86964600 |
| H | -0.42139300 | -3.36226000 | 0.77092200  |

|   |             |             |             |
|---|-------------|-------------|-------------|
| H | -0.90666600 | -4.13070500 | -0.75568700 |
| H | 0.60172400  | -3.20025900 | -0.66591400 |
| C | -2.77734100 | -2.03690000 | 1.12081700  |
| C | -3.38980300 | -3.39751800 | 1.44435000  |
| C | -3.61398900 | -0.89884200 | 1.69048500  |
| H | -1.79395200 | -1.98155000 | 1.60964400  |
| H | -2.80907200 | -4.21988600 | 1.00989700  |
| H | -3.43146100 | -3.54534800 | 2.52996600  |
| H | -4.41730700 | -3.47214500 | 1.06543000  |
| H | -3.09937300 | 0.05690900  | 1.53507100  |
| H | -4.60157700 | -0.84345900 | 1.21222600  |
| H | -3.77798800 | -1.04181400 | 2.76580000  |
| H | 4.25761700  | 2.21508500  | -1.00064400 |
| H | 5.29953300  | 0.86690700  | -1.41196100 |
| C | 2.64523000  | 0.41497100  | 2.20856700  |
| H | 2.79016800  | -0.64944900 | 2.42630600  |
| H | 3.45586000  | 0.97580300  | 2.69019500  |
| H | 1.69943600  | 0.71324100  | 2.67619500  |
| C | 2.29259500  | 2.21187800  | 0.56671500  |
| H | 2.11441500  | 2.51060500  | -0.47207000 |
| H | 1.38224700  | 2.44638600  | 1.13256300  |
| H | 3.10727900  | 2.82135600  | 0.97793300  |

### TS RS·-I<sub>1</sub>

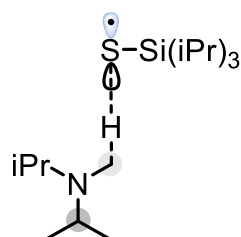

$$E = -1374.694918$$

$$G_{\text{Corr.}} = 0.447899$$

|    |             |             |             |
|----|-------------|-------------|-------------|
| N  | -3.05684200 | 0.15635300  | -0.33327500 |
| C  | -1.93609700 | 0.81464000  | -0.77744200 |
| H  | -1.47182900 | 0.38832100  | -1.66911900 |
| H  | -1.97425300 | 1.90454500  | -0.74576100 |
| C  | -3.95674400 | 0.81080500  | 0.62541600  |
| C  | -4.80137500 | 1.87090100  | -0.07034500 |
| C  | -3.21516500 | 1.38074300  | 1.82865500  |
| H  | -4.63214600 | 0.02548700  | 0.98999600  |
| H  | -5.36546500 | 1.43826700  | -0.90445300 |
| H  | -5.51089200 | 2.31862100  | 0.63517200  |
| H  | -4.17124500 | 2.67749500  | -0.46603900 |
| H  | -2.60147000 | 0.61822700  | 2.32140800  |
| H  | -2.55469300 | 2.20755400  | 1.53831600  |
| H  | -3.93501500 | 1.77119300  | 2.55713500  |
| C  | -3.14754500 | -1.29465500 | -0.52911600 |
| C  | -4.50863600 | -1.69817800 | -1.07821600 |
| C  | -2.78347900 | -2.07041000 | 0.73188200  |
| H  | -2.39449300 | -1.52388700 | -1.29774200 |
| H  | -4.74272900 | -1.14459800 | -1.99434300 |
| H  | -4.51423000 | -2.76933600 | -1.30991000 |
| H  | -5.31204200 | -1.51886700 | -0.35239200 |
| H  | -1.79641100 | -1.77167700 | 1.10754200  |
| H  | -3.52055400 | -1.90650400 | 1.52906500  |
| H  | -2.76302400 | -3.14596100 | 0.51828500  |
| Si | 1.97288500  | 0.08648900  | -0.01319600 |
| S  | 0.32064100  | 0.37528300  | 1.35338400  |
| H  | -0.71296000 | 0.57872900  | 0.29266700  |
| C  | 1.73462200  | 1.27026900  | -1.48904200 |
| C  | 2.84481700  | 1.13276500  | -2.53212200 |
| C  | 1.58736000  | 2.72916100  | -1.06220000 |
| H  | 0.78653100  | 0.95890800  | -1.95997600 |
| H  | 2.98071100  | 0.09943800  | -2.87776900 |
| H  | 2.63095500  | 1.75016600  | -3.41622500 |
| H  | 3.80774700  | 1.47819800  | -2.12927500 |
| H  | 0.76968900  | 2.87110000  | -0.34487800 |
| H  | 2.50735500  | 3.09912100  | -0.58706200 |

|   |             |             |             |
|---|-------------|-------------|-------------|
| H | 1.39406200  | 3.37469000  | -1.93112900 |
| C | 3.58319700  | 0.50003400  | 0.92289600  |
| C | 4.80600200  | -0.16764100 | 0.28792300  |
| C | 3.53582400  | 0.19746300  | 2.42035600  |
| H | 3.69365200  | 1.59264100  | 0.80785400  |
| H | 4.90000300  | 0.03956800  | -0.78552100 |
| H | 5.73122700  | 0.17653600  | 0.77146700  |
| H | 4.76926900  | -1.25945100 | 0.40812800  |
| H | 2.72331200  | 0.73332200  | 2.92466000  |
| H | 3.38865700  | -0.87492500 | 2.61111200  |
| H | 4.48031500  | 0.48594000  | 2.90399500  |
| C | 1.98435400  | -1.71021200 | -0.64598600 |
| C | 0.75391500  | -2.02119500 | -1.49585300 |
| C | 2.10457900  | -2.72306700 | 0.49160800  |
| H | 2.87918700  | -1.80045800 | -1.28615600 |
| H | 0.66511600  | -1.36540600 | -2.37221600 |
| H | 0.77805200  | -3.05792900 | -1.86112300 |
| H | -0.16443600 | -1.90995500 | -0.89914900 |
| H | 3.02157500  | -2.58979800 | 1.07992300  |
| H | 1.25404800  | -2.63569700 | 1.18287700  |
| H | 2.10990600  | -3.75200300 | 0.10367900  |

### TS RS<sup>-</sup>-I<sub>2</sub>

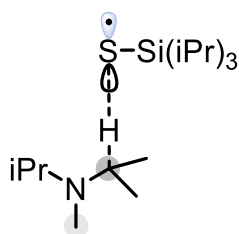

$$E = -1374.692377$$

$$G_{\text{Corr.}} = 0.446749$$

|    |             |             |             |
|----|-------------|-------------|-------------|
| N  | -3.33876800 | 0.25074100  | 0.27887700  |
| C  | -3.11074200 | -0.01073000 | 1.69166000  |
| H  | -3.23848900 | 0.89577700  | 2.29354700  |
| H  | -3.82950400 | -0.74577700 | 2.05824900  |
| C  | -4.14291500 | -0.74204700 | -0.45188300 |
| C  | -5.54728300 | -0.84822000 | 0.13125900  |
| C  | -3.47288200 | -2.10829800 | -0.54120100 |
| H  | -4.25923100 | -0.34798800 | -1.46684600 |
| H  | -5.99963000 | 0.14198800  | 0.25363200  |
| H  | -6.17837600 | -1.43479200 | -0.54609900 |
| H  | -5.56121100 | -1.35824000 | 1.10225100  |
| H  | -2.50269300 | -2.04959900 | -1.04740900 |
| H  | -3.30419600 | -2.53317400 | 0.45710200  |
| H  | -4.11230900 | -2.80542800 | -1.09613200 |
| C  | -2.39595900 | 1.05219400  | -0.37234900 |
| C  | -2.00837100 | 2.31422600  | 0.35448500  |
| C  | -2.54063700 | 1.22625600  | -1.85771300 |
| H  | -1.05315800 | 0.20253100  | -0.33742900 |
| H  | -1.69449500 | 2.14936300  | 1.38916000  |
| H  | -1.17928400 | 2.80686600  | -0.16427200 |
| H  | -2.85818000 | 3.01779700  | 0.37146500  |
| H  | -2.47219700 | 0.28100900  | -2.40945500 |
| H  | -3.49437700 | 1.71148600  | -2.12327400 |
| H  | -1.73409000 | 1.87144000  | -2.22218500 |
| Si | 1.92717400  | -0.18453800 | 0.00243900  |
| S  | -0.04225400 | -0.93264500 | -0.49895500 |
| H  | -2.09875600 | -0.41114400 | 1.86838900  |
| C  | 3.04270700  | -1.70165500 | -0.30043700 |
| C  | 4.50227400  | -1.43441200 | 0.07162800  |
| C  | 2.95608900  | -2.23626000 | -1.72879100 |
| H  | 2.64870600  | -2.47928400 | 0.37578200  |
| H  | 4.62356500  | -1.04877500 | 1.09246400  |
| H  | 5.09890300  | -2.35458700 | -0.00488600 |
| H  | 4.95584200  | -0.70500400 | -0.61493700 |
| H  | 1.93046800  | -2.50181000 | -2.01086100 |
| H  | 3.31834800  | -1.49481400 | -2.45573100 |
| H  | 3.58153400  | -3.13263000 | -1.84828800 |

|   |            |             |             |
|---|------------|-------------|-------------|
| C | 2.48131600 | 1.24939600  | -1.13225000 |
| C | 3.61543900 | 2.07081100  | -0.51348900 |
| C | 1.36041800 | 2.17410200  | -1.59694300 |
| H | 2.87891400 | 0.73667400  | -2.02571200 |
| H | 4.46399800 | 1.45593000  | -0.18891000 |
| H | 3.99998900 | 2.80719000  | -1.23349100 |
| H | 3.26465000 | 2.63316100  | 0.36328100  |
| H | 0.54309600 | 1.61934900  | -2.07441800 |
| H | 0.93587600 | 2.73735200  | -0.75293100 |
| H | 1.73531000 | 2.91366600  | -2.31896900 |
| C | 2.03172000 | 0.30437700  | 1.83882400  |
| C | 1.83129300 | -0.89350300 | 2.76525400  |
| C | 1.05241800 | 1.41640700  | 2.20425300  |
| H | 3.05731500 | 0.68738800  | 1.98072900  |
| H | 2.58716200 | -1.67459500 | 2.61719500  |
| H | 1.87923600 | -0.58510800 | 3.81965300  |
| H | 0.84541500 | -1.35251300 | 2.60219200  |
| H | 1.15541200 | 2.30641200  | 1.56843000  |
| H | 0.01798100 | 1.05803900  | 2.10438900  |
| H | 1.18615800 | 1.73662400  | 3.24749500  |

### TS II<sub>1</sub>-P<sub>1</sub>(RSH)

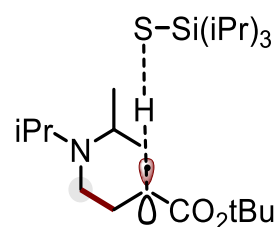

$$E = -1798.987995$$

$$G_{\text{Corr.}} = 0.61622$$

|   |             |             |             |
|---|-------------|-------------|-------------|
| C | 4.93797400  | -0.90043600 | -0.54300600 |
| H | 5.40306100  | -1.85937100 | -0.81386300 |
| N | 3.89383000  | -1.22416600 | 0.42766000  |
| C | 3.51128500  | -2.61889500 | 0.62273600  |
| C | 4.62857100  | -3.40641000 | 1.30084500  |
| C | 3.04546300  | -3.32874300 | -0.64986100 |
| H | 2.65954900  | -2.59318200 | 1.32237200  |
| H | 4.92144500  | -2.92987600 | 2.24309300  |
| H | 4.30768000  | -4.43382500 | 1.51205000  |
| H | 5.51872100  | -3.46695200 | 0.66055500  |
| H | 2.22941200  | -2.78809700 | -1.14342000 |
| H | 3.86848200  | -3.42970100 | -1.36995400 |
| H | 2.68949800  | -4.34015200 | -0.41600500 |
| C | 2.94887900  | -0.21620800 | 0.80711700  |
| C | 1.61166200  | -0.21521500 | 0.00190900  |
| H | 1.82632900  | -0.10178200 | -1.06810100 |
| H | 1.12750500  | -1.18929600 | 0.15172200  |
| C | 0.70750800  | 0.86673100  | 0.45285300  |
| H | 0.29448300  | 0.81061000  | 1.46468100  |
| C | 0.93711500  | 2.23654800  | -0.04286900 |
| O | 1.73318500  | 2.51544800  | -0.92329300 |
| O | 0.11389200  | 3.09634100  | 0.56718700  |
| C | -0.05390900 | 4.47853100  | 0.10361900  |
| C | 1.22484500  | 5.26234500  | 0.34040500  |
| C | -0.48644800 | 4.48729700  | -1.35293200 |
| C | -1.17420600 | 4.98810400  | 0.99208700  |
| H | 1.52919200  | 5.18702600  | 1.39113000  |
| H | 2.03953800  | 4.90325400  | -0.29391700 |
| H | 1.04607800  | 6.32030300  | 0.11308700  |
| H | -1.36046600 | 3.83889500  | -1.49284200 |
| H | -0.76960800 | 5.50877200  | -1.63414300 |
| H | 0.31316300  | 4.15315700  | -2.01911800 |
| H | -1.40313700 | 6.03091000  | 0.74485500  |
| H | -2.08011900 | 4.38700600  | 0.84701800  |
| H | -0.88508100 | 4.93546700  | 2.04802500  |
| H | -0.55934600 | 0.62275200  | -0.29508600 |
| H | 2.68732900  | -0.33683300 | 1.87151800  |
| H | 3.41484300  | 0.77334100  | 0.70925600  |
| C | 4.42931500  | -0.26151900 | -1.83445600 |

|    |             |             |             |
|----|-------------|-------------|-------------|
| H  | 5.26481900  | -0.09331900 | -2.52505000 |
| H  | 3.69596300  | -0.90020400 | -2.34055900 |
| H  | 3.96050400  | 0.71304200  | -1.64306600 |
| C  | 6.02348300  | -0.03970100 | 0.09642600  |
| H  | 6.84340000  | 0.14450200  | -0.60877600 |
| H  | 5.62686900  | 0.93816000  | 0.40012000  |
| H  | 6.43045500  | -0.53331200 | 0.98669600  |
| S  | -1.81782800 | 0.53819700  | -1.13801900 |
| Si | -2.78127200 | -1.05195500 | 0.00151500  |
| C  | -2.10717800 | -0.96953500 | 1.78104200  |
| C  | -4.65251300 | -0.69681200 | -0.04430900 |
| C  | -2.36010800 | -2.73452100 | -0.77781700 |
| C  | -2.59933200 | -2.12972300 | 2.64812100  |
| C  | -2.40426000 | 0.36369600  | 2.46628600  |
| H  | -1.01220900 | -1.06916000 | 1.67796600  |
| C  | -5.47701600 | -1.94535600 | 0.28011100  |
| C  | -5.14297200 | -0.05945600 | -1.34438700 |
| H  | -4.80787100 | 0.03720100  | 0.76522200  |
| C  | -0.86472000 | -3.03816900 | -0.70874200 |
| C  | -2.85036800 | -2.84318300 | -2.22128700 |
| H  | -2.89632300 | -3.48580800 | -0.17194600 |
| H  | -2.39689200 | -3.11232100 | 2.20318100  |
| H  | -2.11629100 | -2.10906000 | 3.63511600  |
| H  | -3.68199700 | -2.05939400 | 2.82374000  |
| H  | -2.07943500 | 1.22893700  | 1.87364500  |
| H  | -3.48176400 | 0.47889300  | 2.64978000  |
| H  | -1.90588800 | 0.41947300  | 3.44479800  |
| H  | -5.17369600 | -2.43010800 | 1.21665600  |
| H  | -6.54244000 | -1.69207200 | 0.37200600  |
| H  | -5.39436200 | -2.69553600 | -0.51849800 |
| H  | -4.63990300 | 0.89185400  | -1.55391100 |
| H  | -4.97564600 | -0.71841200 | -2.20748600 |
| H  | -6.22303500 | 0.13855900  | -1.29328300 |
| H  | -0.47228700 | -3.03155800 | 0.31825300  |
| H  | -0.64290900 | -4.02643800 | -1.13646000 |
| H  | -0.29457100 | -2.29876200 | -1.29173000 |
| H  | -3.93993200 | -2.74522000 | -2.30473300 |
| H  | -2.39741000 | -2.06318400 | -2.84959300 |
| H  | -2.57449900 | -3.81434500 | -2.65600900 |

### TS II<sub>2</sub>-P<sub>2</sub>(RSH)

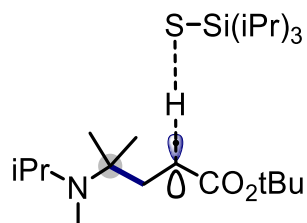

$$E = -1798.98948$$

$$G_{\text{Corr.}} = 0.616775$$

|   |            |             |             |
|---|------------|-------------|-------------|
| C | 4.92057300 | -0.91682800 | -1.05108100 |
| H | 4.34834200 | -0.64760300 | -1.95862700 |
| N | 4.10024800 | -1.29549000 | 0.08319500  |
| C | 3.61967900 | -2.68842400 | 0.03245800  |
| C | 4.67928800 | -3.62367300 | 0.60303600  |
| C | 3.16172700 | -3.17156400 | -1.34550900 |
| H | 2.74719600 | -2.74939400 | 0.69507600  |
| H | 4.92827800 | -3.34091700 | 1.63212700  |
| H | 4.32767300 | -4.66296100 | 0.59870300  |
| H | 5.60176600 | -3.58374900 | 0.00862700  |
| H | 2.43501600 | -2.49376400 | -1.80832900 |
| H | 4.00436000 | -3.28742900 | -2.03831600 |
| H | 2.68447600 | -4.15421400 | -1.24661800 |
| C | 3.18144900 | -0.28168700 | 0.61388200  |
| C | 1.89144400 | -0.20176600 | -0.27494400 |
| H | 2.18436300 | -0.02211300 | -1.31878200 |
| H | 1.40877500 | -1.18749700 | -0.22250500 |
| C | 0.91179800 | 0.83283700  | 0.13730000  |
| H | 0.51592800 | 0.79812800  | 1.15538800  |
| C | 0.97563600 | 2.18882700  | -0.44365500 |

|    |             |             |             |
|----|-------------|-------------|-------------|
| O  | 1.52157800  | 2.45434900  | -1.49921600 |
| O  | 0.29728800  | 3.05095800  | 0.32478200  |
| C  | 0.02140600  | 4.42599600  | -0.10747700 |
| C  | 1.32159800  | 5.19489500  | -0.26784100 |
| C  | -0.81058900 | 4.39766300  | -1.37780400 |
| C  | -0.78891500 | 4.98066800  | 1.05032300  |
| H  | 1.92757800  | 5.10859500  | 0.64257000  |
| H  | 1.90467600  | 4.83274100  | -1.11805000 |
| H  | 1.09398600  | 6.25615000  | -0.42492900 |
| H  | -1.70208600 | 3.77450000  | -1.23183600 |
| H  | -1.13909500 | 5.41647400  | -1.61605100 |
| H  | -0.24315000 | 4.00834800  | -2.22747000 |
| H  | -1.07022100 | 6.01975400  | 0.84515300  |
| H  | -1.70388300 | 4.39448400  | 1.19692000  |
| H  | -0.20541100 | 4.95458800  | 1.97788300  |
| H  | -0.29365800 | 0.41267700  | -0.57438400 |
| S  | -1.49976300 | 0.08177600  | -1.45499200 |
| Si | -2.59402000 | -1.05930000 | 0.04757200  |
| C  | -2.07874100 | -0.40530200 | 1.76109500  |
| C  | -4.44603200 | -0.75215700 | -0.27831100 |
| C  | -2.13984700 | -2.89968300 | -0.10390600 |
| C  | -2.73689000 | -1.18011900 | 2.90418100  |
| C  | -2.32818000 | 1.09360100  | 1.92396400  |
| H  | -0.99068400 | -0.58581700 | 1.82155200  |
| C  | -5.32498700 | -1.83516500 | 0.35330100  |
| C  | -4.80557500 | -0.57173100 | -1.75328900 |
| H  | -4.65568400 | 0.20238600  | 0.23518700  |
| C  | -0.65521600 | -3.14340000 | 0.16100000  |
| C  | -2.53028900 | -3.48785900 | -1.45931600 |
| H  | -2.72280500 | -3.41456900 | 0.67976200  |
| H  | -2.57506900 | -2.26366200 | 2.83544600  |
| H  | -2.34171200 | -0.84920700 | 3.87482600  |
| H  | -3.82162600 | -1.00464400 | 2.92684500  |
| H  | -1.88021300 | 1.68932200  | 1.11803600  |
| H  | -3.40542300 | 1.31192800  | 1.93711800  |
| H  | -1.91502200 | 1.45866300  | 2.87580000  |
| H  | -5.11757000 | -1.99122900 | 1.41925800  |
| H  | -6.38800700 | -1.57215900 | 0.26080300  |
| H  | -5.18994400 | -2.80176300 | -0.15129200 |
| H  | -4.26034500 | 0.26062800  | -2.21373100 |
| H  | -4.58372600 | -1.47543500 | -2.33764900 |
| H  | -5.88014900 | -0.36962000 | -1.86631500 |
| H  | -0.32012700 | -2.74545700 | 1.12913400  |
| H  | -0.42160700 | -4.21760600 | 0.14700100  |
| H  | -0.04781700 | -2.67208800 | -0.62627500 |
| H  | -3.61043300 | -3.44030700 | -1.64500000 |
| H  | -2.02840500 | -2.95242100 | -2.27781600 |
| H  | -2.23216400 | -4.54367600 | -1.52842800 |
| H  | 5.57761300  | -1.75217900 | -1.31490200 |
| H  | 5.57321100  | -0.07551700 | -0.80208300 |
| C  | 3.87313300  | 1.08005900  | 0.64601300  |
| H  | 4.05275700  | 1.48794800  | -0.35432800 |
| H  | 3.24772800  | 1.80273200  | 1.18496300  |
| H  | 4.82972000  | 1.00527900  | 1.17807600  |
| C  | 2.80111600  | -0.63958400 | 2.05406300  |
| H  | 2.16139400  | -1.52709400 | 2.12564000  |
| H  | 3.71117600  | -0.82461300 | 2.63754400  |
| H  | 2.25833300  | 0.18750200  | 2.52634400  |

### P<sub>1</sub>

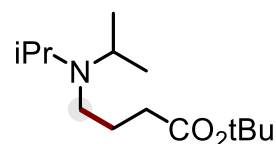

$$E = -755.8761941$$

$$G_{\text{Corr.}} = 0.363292$$

|   |            |             |            |
|---|------------|-------------|------------|
| C | 4.16591500 | -0.91489000 | 1.60857500 |
| C | 3.58062900 | -1.06806100 | 0.20384300 |
| H | 3.02840400 | -2.02122400 | 0.18571800 |
| H | 3.37768700 | -0.83661300 | 2.36789000 |



|   |             |             |             |
|---|-------------|-------------|-------------|
| H | 4.78930100  | -1.78189900 | 1.86053800  |
| H | 4.80164200  | -0.02227100 | 1.67991000  |
| C | 4.68662000  | -1.18120600 | -0.83747900 |
| H | 4.25996900  | -1.34477700 | -1.83383600 |
| H | 5.30131300  | -0.27216600 | -0.87655100 |
| H | 5.35805200  | -2.01581300 | -0.60073000 |
| N | 2.59804100  | -0.05132200 | -0.17198700 |
| C | 3.00938500  | 1.35287900  | -0.11383600 |
| C | 2.69089500  | 2.08252700  | 1.19475900  |
| C | 2.42487400  | 2.11073600  | -1.30044600 |
| H | 4.10341200  | 1.35382300  | -0.22980900 |
| H | 3.05025200  | 1.53303400  | 2.07157200  |
| H | 3.16429000  | 3.07232900  | 1.19777200  |
| H | 1.61158300  | 2.24310200  | 1.31446000  |
| H | 2.75045000  | 1.65592500  | -2.24325500 |
| H | 1.32618000  | 2.08442400  | -1.27661600 |
| H | 2.73218200  | 3.16424600  | -1.29106700 |
| C | 1.23687500  | -0.34774800 | 0.23051300  |
| H | 1.19761800  | -0.81459600 | 1.23760900  |
| H | 0.67075800  | 0.58805700  | 0.31410900  |
| C | 0.51990300  | -1.24524200 | -0.77221700 |
| H | 0.49565200  | -0.72947800 | -1.74195600 |
| H | 1.09790400  | -2.16812700 | -0.92034100 |
| C | -1.86580700 | -0.46469400 | -0.39534800 |
| O | -1.64733100 | 0.60767500  | -0.92047300 |
| O | -3.01715500 | -0.80918700 | 0.19400200  |
| C | -4.17210100 | 0.09732200  | 0.24203900  |
| C | -3.82420400 | 1.34373100  | 1.03740800  |
| C | -4.64415300 | 0.41656200  | -1.16606400 |
| C | -5.21355900 | -0.72755900 | 0.97681200  |
| H | -3.42664600 | 1.06875600  | 2.02165200  |
| H | -3.09169200 | 1.96615800  | 0.51789000  |
| H | -4.73499000 | 1.93451800  | 1.19295900  |
| H | -4.82350600 | -0.50880400 | -1.72644100 |
| H | -5.59111200 | 0.96683100  | -1.10948900 |
| H | -3.91944900 | 1.02789100  | -1.70948200 |
| H | -6.14043900 | -0.15179400 | 1.07913800  |
| H | -5.43553100 | -1.64919800 | 0.42694300  |
| H | -4.85846200 | -0.99580700 | 1.97832500  |
| C | -0.88837400 | -1.61224000 | -0.33837000 |
| H | -1.30497100 | -2.40582800 | -0.97385500 |
| H | -0.90162500 | -2.02204500 | 0.68149800  |

**P<sub>2</sub>**

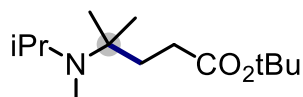

**E = -755.8729926**

**G<sub>Corr.</sub> = 0.363508**

|   |             |             |             |
|---|-------------|-------------|-------------|
| C | 4.88302500  | 0.38055000  | 0.68295400  |
| C | 3.75984200  | -0.52063300 | 0.16372000  |
| H | 3.31958300  | -1.00630000 | 1.04326300  |
| H | 4.50259400  | 1.21475500  | 1.28294700  |
| H | 5.56163200  | -0.20559300 | 1.31456600  |
| H | 5.48368700  | 0.79814000  | -0.13490100 |
| C | 4.32834200  | -1.62741300 | -0.71667500 |
| H | 3.54204400  | -2.33905400 | -0.99319100 |
| H | 4.75103000  | -1.21613800 | -1.64320900 |
| H | 5.13015100  | -2.17074900 | -0.20027000 |
| N | 2.66460400  | 0.16889700  | -0.54273000 |
| C | 3.13005400  | 1.23079400  | -1.41204200 |
| H | 4.03626100  | 0.89907200  | -1.93073000 |
| C | 1.43058500  | 0.43502500  | 0.23754000  |
| C | 0.80934400  | -0.93575000 | 0.58888000  |
| H | 0.77163400  | -1.53407900 | -0.33162000 |
| H | 1.47392100  | -1.46748900 | 1.28042600  |
| C | -1.70550500 | -0.82089900 | 0.21627300  |
| O | -1.70782500 | -1.39285500 | -0.85410400 |
| O | -2.70531300 | -0.06229100 | 0.68216200  |
| C | -3.92696200 | 0.17544700  | -0.09958800 |
| C | -3.57941300 | 0.92244700  | -1.37578100 |

|   |             |             |             |
|---|-------------|-------------|-------------|
| C | -4.64875300 | -1.13458400 | -0.36441400 |
| C | -4.74879900 | 1.05617100  | 0.82429800  |
| H | -3.02235400 | 1.83797300  | -1.14093400 |
| H | -2.98493400 | 0.30845300  | -2.05729700 |
| H | -4.50594200 | 1.21184200  | -1.88622700 |
| H | -4.80861900 | -1.67713400 | 0.57509200  |
| H | -5.63120700 | -0.91815900 | -0.80117200 |
| H | -4.09352600 | -1.77371200 | -1.05498100 |
| H | -5.69816900 | 1.31689000  | 0.34285200  |
| H | -4.96695600 | 0.53486400  | 1.76331800  |
| H | -4.21052800 | 1.98226800  | 1.05602200  |
| C | -0.58135600 | -0.91148100 | 1.21865300  |
| H | -0.74768400 | -1.85891200 | 1.75066400  |
| H | -0.69392000 | -0.12112000 | 1.96941700  |
| C | 1.70685700  | 1.25200700  | 1.50772700  |
| H | 2.33532700  | 0.70159100  | 2.21893700  |
| H | 2.21408600  | 2.19287600  | 1.25735700  |
| H | 0.77645800  | 1.51730300  | 2.02524900  |
| C | 0.44337500  | 1.21867500  | -0.62695700 |
| H | 0.23076000  | 0.69555900  | -1.56779500 |
| H | -0.50157200 | 1.35567300  | -0.08725200 |
| H | 0.81159500  | 2.22451200  | -0.85648000 |
| H | 3.37758900  | 2.17899800  | -0.89500100 |
| H | 2.39613400  | 1.45441800  | -2.19193200 |

**TS II<sub>2</sub>-H<sub>[1-5]p</sub>**

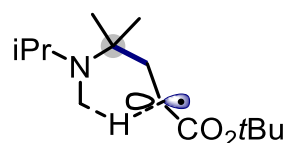

**E = -755.1973975**

**G<sub>Corr.</sub> = 0.348372**

|   |             |             |             |
|---|-------------|-------------|-------------|
| N | 2.40868300  | 0.22549900  | 0.54861500  |
| C | 2.63406300  | 1.43069600  | -0.27350400 |
| C | 3.39853600  | 2.46934000  | 0.53805800  |
| C | 1.36933400  | 2.03202300  | -0.88347100 |
| H | 3.29055700  | 1.12541000  | -1.09448100 |
| H | 4.31951600  | 2.04154600  | 0.94933200  |
| H | 3.66311400  | 3.32270300  | -0.09718800 |
| H | 2.79894000  | 2.85514100  | 1.37234900  |
| H | 0.82186600  | 1.31756100  | -1.50703900 |
| H | 0.67771800  | 2.39004100  | -0.10855500 |
| H | 1.63676000  | 2.89478800  | -1.50518300 |
| C | 2.41520000  | -1.12274000 | -0.06609600 |
| C | 1.03562900  | -1.42970800 | -0.72096000 |
| H | 0.93003900  | -0.82142300 | -1.62858500 |
| H | 1.07220600  | -2.48150000 | -1.04922700 |
| C | -0.14982200 | -1.18687800 | 0.16763700  |
| H | -0.40793900 | -1.97572900 | 0.87872800  |
| C | -1.31855000 | -0.53285400 | -0.41597800 |
| O | -1.34220000 | 0.05234100  | -1.49125500 |
| O | -2.37354300 | -0.59629600 | 0.42956800  |
| C | -3.60990900 | 0.13357100  | 0.16720300  |
| C | -3.33081400 | 1.62657000  | 0.08522200  |
| C | -4.28959100 | -0.39963800 | -1.08368200 |
| C | -4.45175600 | -0.17600500 | 1.39361900  |
| H | -2.76917100 | 1.95422000  | 0.96939700  |
| H | -2.76137300 | 1.88378300  | -0.81164700 |
| H | -4.28202100 | 2.17255100  | 0.06543900  |
| H | -4.42124700 | -1.48585500 | -1.00864300 |
| H | -5.28262900 | 0.05705000  | -1.17801300 |
| H | -3.71305100 | -0.17318200 | -1.98360200 |
| H | -5.42629100 | 0.31957200  | 1.31474800  |
| H | -4.61698400 | -1.25577000 | 1.48481400  |
| H | -3.95357400 | 0.17773500  | 2.30369100  |
| C | 1.46833800  | 0.36027500  | 1.58231600  |
| H | 1.64683400  | -0.26026700 | 2.46454200  |
| H | 1.21885500  | 1.38934300  | 1.84253400  |
| H | 0.36814900  | -0.26023200 | 1.02722500  |
| C | 2.71451600  | -2.16128000 | 1.01958100  |

|   |            |             |             |
|---|------------|-------------|-------------|
| H | 1.92600100 | -2.24034300 | 1.77420800  |
| H | 2.81720800 | -3.15010700 | 0.55790900  |
| H | 3.65511700 | -1.91843600 | 1.52911900  |
| C | 3.50092300 | -1.24580000 | -1.12823100 |
| H | 4.47734900 | -0.94539900 | -0.72690700 |
| H | 3.57304800 | -2.29189200 | -1.44672900 |
| H | 3.28957000 | -0.65358300 | -2.02532100 |

### TS II<sub>2</sub>-H<sub>[1-5]t</sub>

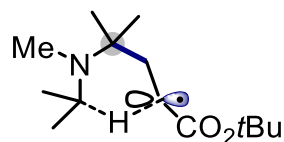

E = -755.1974886

G<sub>Corr.</sub> = 0.349522

|   |             |             |             |
|---|-------------|-------------|-------------|
| N | -2.50541600 | 0.54131900  | 0.41002700  |
| C | -2.62741600 | -0.78735300 | -0.25786800 |
| C | -1.28465900 | -1.55667000 | -0.13221500 |
| H | -1.08584700 | -1.75982200 | 0.92868900  |
| H | -1.41875800 | -2.53191500 | -0.62622500 |
| C | -0.11715900 | -0.81416800 | -0.71662700 |
| H | 0.05692900  | -0.91503000 | -1.79011400 |
| C | 1.10904100  | -0.73124800 | 0.07509000  |
| O | 1.18145900  | -0.92984800 | 1.28146700  |
| O | 2.15079100  | -0.32964300 | -0.68823300 |
| C | 3.46370400  | -0.05012100 | -0.11245600 |
| C | 3.36820300  | 1.09702800  | 0.88067300  |
| C | 4.05232100  | -1.30709000 | 0.50811200  |
| C | 4.28085600  | 0.36910200  | -1.32262400 |
| H | 2.89448000  | 1.96731000  | 0.40900800  |
| H | 2.79462500  | 0.81683300  | 1.76814100  |
| H | 4.37784400  | 1.38943400  | 1.19433000  |
| H | 4.04357800  | -2.12771600 | -0.21945300 |
| H | 5.09482800  | -1.11536800 | 0.79067400  |
| H | 3.49891000  | -1.61587300 | 1.39812400  |
| H | 5.30494800  | 0.61289200  | -1.01721000 |
| H | 4.32112900  | -0.44091900 | -2.05994800 |
| H | 3.84003000  | 1.25217500  | -1.79950600 |
| C | -1.47613900 | 1.38809900  | -0.13030900 |
| H | -0.62126500 | 0.44540100  | -0.61900000 |
| C | -2.98700300 | -0.63450800 | -1.73594500 |
| H | -2.20914900 | -0.13930200 | -2.32412300 |
| H | -3.13268800 | -1.63100100 | -2.17054000 |
| H | -3.92160900 | -0.07171100 | -1.85081700 |
| C | -3.73352100 | -1.61361800 | 0.38987100  |
| H | -4.67974300 | -1.05789600 | 0.40280600  |
| H | -3.88734700 | -2.52694900 | -0.19599000 |
| H | -3.49187000 | -1.92290300 | 1.41216000  |
| C | -1.89450100 | 2.30831300  | -1.25707100 |
| H | -2.34953500 | 3.21703900  | -0.83075400 |
| H | -1.02389200 | 2.62516000  | -1.84559600 |
| H | -2.62886500 | 1.86668700  | -1.93208200 |
| C | -0.56062100 | 2.09389000  | 0.84078400  |
| H | 0.27227700  | 2.53351600  | 0.27629400  |
| H | -1.06238900 | 2.92340000  | 1.36257700  |
| H | -0.13392100 | 1.41735300  | 1.58994800  |
| C | -2.60050600 | 0.49925000  | 1.86336000  |
| H | -1.82724100 | -0.12268300 | 2.34850200  |
| H | -2.51996600 | 1.51178900  | 2.26410000  |
| H | -3.58117500 | 0.12135900  | 2.16329800  |

### H<sub>[1-5]p</sub>

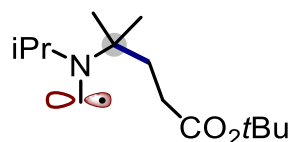

E = -755.2215814

G<sub>Corr.</sub> = 0.350148

|   |             |             |             |
|---|-------------|-------------|-------------|
| N | 3.17494100  | -0.24531600 | 0.33065600  |
| C | 3.51943500  | 0.96516600  | -0.43357700 |
| C | 4.94209200  | 0.86520200  | -0.97116900 |
| C | 3.31236200  | 2.26510800  | 0.34083600  |
| H | 2.84197200  | 0.99807900  | -1.29447500 |
| H | 5.06045800  | -0.02368900 | -1.60142100 |
| H | 5.19407500  | 1.75132100  | -1.56639600 |
| H | 5.66493200  | 0.79627300  | -0.14823100 |
| H | 2.31329200  | 2.31342500  | 0.78766400  |
| H | 4.04864300  | 2.38371100  | 1.14434500  |
| H | 3.42758300  | 3.11784600  | -0.33874100 |
| C | 1.97113500  | -1.01511500 | -0.07408600 |
| C | 0.72680500  | -0.13854700 | 0.16646400  |
| H | 0.75253900  | 0.19371000  | 1.21501100  |
| H | 0.80113400  | 0.77134100  | -0.44516400 |
| C | -0.61056800 | -0.79927500 | -0.11885500 |
| H | -0.66937700 | -1.18286900 | -1.14743200 |
| C | -1.77754500 | 0.13683000  | 0.06742000  |
| O | -1.68656200 | 1.30686200  | 0.37445500  |
| O | -2.92656200 | -0.51150100 | -0.15810400 |
| C | -4.23154200 | 0.15553100  | -0.05124800 |
| C | -4.45387400 | 0.63819500  | 1.37173700  |
| C | -4.32878600 | 1.27797500  | -1.07014700 |
| C | -5.20495000 | -0.95806500 | -0.39308700 |
| H | -4.31225900 | -0.18679300 | 2.08008600  |
| H | -3.77653700 | 1.45442900  | 1.63489700  |
| H | -5.48566500 | 0.99635000  | 1.47094500  |
| H | -4.09939100 | 0.90155100  | -2.07423900 |
| H | -5.35520400 | 1.66407000  | -1.07973000 |
| H | -3.65025200 | 2.10146000  | -0.83395200 |
| H | -6.23297800 | -0.58111700 | -0.34701700 |
| H | -5.01893000 | -1.33792300 | -1.40414200 |
| H | -5.10710300 | -1.78858900 | 0.31522300  |
| C | 3.64999100  | -0.31430400 | 1.62832200  |
| H | 3.59427300  | -1.26120800 | 2.15225100  |
| H | 4.47902000  | 0.34120900  | 1.87592500  |
| H | -0.78783100 | -1.66896300 | 0.52812200  |
| C | 1.88092200  | -2.30116700 | 0.74441900  |
| H | 1.63488300  | -2.10997600 | 1.79528700  |
| H | 1.09890200  | -2.94735800 | 0.33199000  |
| H | 2.82478000  | -2.85727900 | 0.69756500  |
| C | 2.10692900  | -1.42138000 | -1.54519100 |
| H | 3.04900100  | -1.96267800 | -1.69558100 |
| H | 1.28888700  | -2.09007600 | -1.83621400 |
| H | 2.08710900  | -0.56885700 | -2.23301300 |

### TS H<sub>[1-5]p</sub>-bisAc

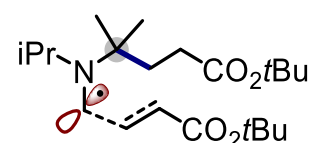

E = -1179.497962

G<sub>Corr.</sub> = 0.51575

|   |             |             |             |
|---|-------------|-------------|-------------|
| N | -0.57295600 | 1.71454800  | 0.34724200  |
| C | -0.84655500 | 1.92700100  | -1.08764300 |
| C | -1.92455000 | 2.98702300  | -1.27726900 |
| C | -1.19555200 | 0.63771000  | -1.82387000 |
| H | 0.07884100  | 2.31601500  | -1.52666600 |
| H | -1.64420100 | 3.92469300  | -0.78374800 |
| H | -2.07725700 | 3.18689900  | -2.34429800 |
| H | -2.88548300 | 2.65830000  | -0.86054300 |
| H | -0.39682600 | -0.10742200 | -1.73443100 |
| H | -2.12209800 | 0.19470100  | -1.43863900 |
| H | -1.34681800 | 0.84928900  | -2.88936600 |
| C | 0.82171500  | 1.86998200  | 0.84062900  |
| C | 1.68885500  | 0.79331400  | 0.16084800  |

|   |             |             |             |    |             |             |             |
|---|-------------|-------------|-------------|----|-------------|-------------|-------------|
| H | 1.22909200  | -0.18611400 | 0.36002200  | H  | 0.06717800  | 1.40955900  | -2.11157500 |
| H | 1.65189100  | 0.93044700  | -0.92822900 | H  | -1.40064800 | 2.40211600  | -2.04240200 |
| C | 3.14699000  | 0.75760400  | 0.58457200  | H  | -0.08257100 | 2.86064500  | -3.12911600 |
| H | 3.64055200  | 1.72925400  | 0.44102600  | C  | 1.44339400  | 2.28246700  | 0.99513900  |
| C | 3.94886200  | -0.26141900 | -0.18584500 | C  | 2.12268900  | 1.18214700  | 0.15443400  |
| O | 3.51185600  | -0.94880300 | -1.08479800 | H  | 1.38341200  | 0.39089600  | -0.03828600 |
| O | 5.20686300  | -0.29153800 | 0.26587300  | H  | 2.39829000  | 1.58764000  | -0.82789600 |
| C | 6.21909900  | -1.19427200 | -0.30271000 | C  | 3.36253800  | 0.55940100  | 0.77410100  |
| C | 5.80486300  | -2.63954500 | -0.08792300 | H  | 4.09287200  | 1.31962200  | 1.08793400  |
| C | 6.44827700  | -0.86377200 | -1.76729400 | C  | 4.08683400  | -0.36082300 | -0.17653200 |
| C | 7.45471400  | -0.86722800 | 0.51602900  | O  | 3.83125600  | -0.47957500 | -1.35608800 |
| H | 5.58688300  | -2.82000500 | 0.97145900  | O  | 5.06070100  | -1.01166100 | 0.46962100  |
| H | 4.92749300  | -2.90428500 | -0.68317400 | C  | 5.95144900  | -1.95945400 | -0.21494900 |
| H | 6.63369400  | -3.29575000 | -0.37938900 | C  | 5.14792200  | -3.12723300 | -0.76041000 |
| H | 6.67698500  | 0.20207000  | -1.88618900 | C  | 6.74575000  | -1.24267900 | -1.29318300 |
| H | 7.30898100  | -1.43712300 | -2.13204000 | C  | 6.86907800  | -2.42118500 | 0.90272900  |
| H | 5.57987300  | -1.11365900 | -2.38177800 | H  | 4.53879400  | -3.57450600 | 0.03402100  |
| H | 8.29563300  | -1.48637600 | 0.18377900  | H  | 4.49439400  | -2.82343400 | -1.58179200 |
| H | 7.73056000  | 0.18666600  | 0.39650500  | H  | 5.83882200  | -3.89432100 | -1.13043000 |
| H | 7.27760600  | -1.06343300 | 1.57956700  | H  | 7.25897000  | -0.37001000 | -0.87166000 |
| H | 3.26400400  | 0.52304500  | 1.65080500  | H  | 7.50778100  | -1.92508100 | -1.68852800 |
| C | 0.86442800  | 1.70467600  | 2.35669100  | H  | 6.10884100  | -0.91793000 | -2.11973300 |
| H | 0.62632800  | 0.68207200  | 2.67331600  | H  | 7.59382900  | -3.14547400 | 0.51399500  |
| H | 1.86972200  | 1.94007300  | 2.72035200  | H  | 7.41851400  | -1.57343900 | 1.32772900  |
| H | 0.17247600  | 2.39811400  | 2.84865600  | H  | 6.29344600  | -2.90045500 | 1.70268900  |
| C | 1.30560000  | 3.28691900  | 0.51596900  | C  | -1.04145500 | 2.29857900  | 0.68606100  |
| H | 0.60727400  | 4.02227000  | 0.93339600  | H  | -1.21553700 | 2.20294100  | 1.75589200  |
| H | 2.28870000  | 3.47053300  | 0.96378500  | H  | -1.86856700 | 2.74943900  | 0.13704300  |
| H | 1.39884800  | 3.47311300  | -0.55966900 | H  | 3.12939500  | -0.01746900 | 1.67794000  |
| C | -1.53308300 | 1.07519300  | 1.07812000  | C  | 1.09374400  | 1.74753700  | 2.38038400  |
| H | -1.47203600 | 1.10084200  | 2.15932800  | H  | 0.49628700  | 0.82804700  | 2.33384100  |
| H | -2.53393500 | 1.05942300  | 0.65370500  | H  | 2.01646100  | 1.52006900  | 2.92368200  |
| C | -1.70612200 | -1.39436400 | 1.15557900  | H  | 0.55141300  | 2.49639000  | 2.96960000  |
| H | -0.75210400 | -1.53590400 | 1.65816900  | C  | 2.34883500  | 3.50469300  | 1.17500200  |
| H | -1.67863600 | -1.30903800 | 0.07410800  | H  | 1.80880900  | 4.29074600  | 1.71651400  |
| C | -2.87251900 | -1.61332600 | 1.82043900  | H  | 3.23703600  | 3.24701900  | 1.76266500  |
| H | -2.88285700 | -1.83459100 | 2.88564200  | H  | 2.69610800  | 3.91958800  | 0.22190700  |
| C | -4.19678200 | -1.48668800 | 1.23250000  | Si | -3.36877100 | -0.97736400 | -0.02070200 |
| O | -5.23462900 | -1.71240800 | 1.84194600  | S  | -1.21691100 | -0.76708600 | 0.08422700  |
| O | -4.15877800 | -1.07074700 | -0.05669000 | H  | -1.21808700 | 0.71058700  | 0.33219900  |
| C | -5.38205500 | -0.81322700 | -0.81081800 | C  | -4.04095500 | 0.47272100  | -1.06812200 |
| C | -6.18326700 | -2.09441400 | -0.97785400 | C  | -5.53206000 | 0.75246600  | -0.87738000 |
| C | -6.18466200 | 0.29511800  | -0.14735300 | C  | -3.71429700 | 0.30209800  | -2.55102700 |
| C | -4.86477500 | -0.34136400 | -2.15970600 | H  | -3.48598500 | 1.35456000  | -0.70289300 |
| H | -5.55630800 | -2.87741600 | -1.42135400 | H  | -5.79316300 | 0.96469400  | 0.16673600  |
| H | -6.57475700 | -2.45138500 | -0.02238100 | H  | -5.84386700 | 1.62010200  | -1.47665100 |
| H | -7.02556100 | -1.90834300 | -1.65568600 | H  | -6.14866600 | -0.09647000 | -1.20409400 |
| H | -5.54283900 | 1.16781100  | 0.03229500  | H  | -2.65292000 | 0.07632400  | -2.71975500 |
| H | -6.99736100 | 0.60386200  | -0.81639200 | H  | -4.30253300 | -0.51468900 | -2.99338600 |
| H | -6.61579300 | -0.02872700 | 0.80282800  | H  | -3.95697800 | 1.21392600  | -3.11585700 |
| H | -5.70567600 | -0.15687100 | -2.83824900 | C  | -3.69572900 | -2.64289500 | -0.88376600 |
| H | -4.29578600 | 0.59166200  | -2.05523400 | C  | -5.17405300 | -3.03216700 | -0.82434600 |
| H | -4.21179100 | -1.09810000 | -2.61116600 | C  | -2.81465800 | -3.79504800 | -0.40244400 |

### TS H<sub>[1-5]p</sub>-P<sub>2</sub>(RSH)

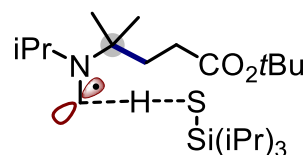

E = -1799.001666

G<sub>Corr.</sub> = 0.614254

|   |             |            |             |
|---|-------------|------------|-------------|
| N | 0.20793200  | 2.71299200 | 0.28602000  |
| C | 0.32732000  | 3.30335700 | -1.05956900 |
| C | -0.23189600 | 4.72077200 | -1.07496500 |
| C | -0.30799900 | 2.43864100 | -2.14300300 |
| H | 1.39928400  | 3.36648000 | -1.27819300 |
| H | 0.26921800  | 5.35090800 | -0.33150700 |
| H | -0.09364900 | 5.17309800 | -2.06397200 |
| H | -1.30697000 | 4.72344700 | -0.85522100 |

### $\alpha$ -C I<sub>1</sub>

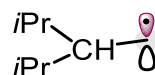

E = -314.8686079

G<sub>Corr.</sub> = 0.191976

|   |             |             |             |
|---|-------------|-------------|-------------|
| C | -1.82762000 | -1.02602400 | -0.67600300 |
| C | -1.46339400 | 0.07139800  | 0.31696000  |
| H | -2.01514400 | -0.13563500 | 1.25030800  |
| H | -1.45863300 | -2.00830000 | -0.35267600 |
| H | -2.91680600 | -1.09480400 | -0.78875300 |
| H | -1.41281600 | -0.81739600 | -1.67156700 |
| C | -1.93896700 | 1.42723700  | -0.19130400 |
| H | -1.69825400 | 2.23181000  | 0.51552700  |
| H | -1.48251300 | 1.68194700  | -1.15731900 |
| H | -3.02573900 | 1.42542500  | -0.34101500 |
| C | 1.04010900  | 0.33812600  | -0.41330500 |
| C | 1.48465900  | -0.92475900 | -1.14923400 |
| C | 2.26730200  | 1.07739100  | 0.11198900  |
| H | 0.54842500  | 0.99916300  | -1.14518900 |
| H | 0.64408300  | -1.53642500 | -1.49265000 |
| H | 2.08760600  | -0.65881000 | -2.02674100 |
| H | 2.10970200  | -1.55749600 | -0.50528400 |
| H | 1.99908900  | 2.04934100  | 0.54452300  |
| H | 2.77287700  | 0.49263100  | 0.89386800  |
| H | 2.99736700  | 1.25291200  | -0.68815000 |
| C | 0.36840900  | -1.10515900 | 1.54974300  |
| H | -0.39859200 | -1.60334800 | 2.14122300  |
| H | 1.40195400  | -1.38120700 | 1.74911400  |
| C | 0.02571900  | 0.08855800  | 0.73162800  |
| H | 0.11009200  | 0.97958200  | 1.39193000  |

$\alpha$ -O I<sub>1</sub>

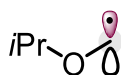

E = -232.908669

G<sub>Corr.</sub> = 0.091096

|   |             |             |             |
|---|-------------|-------------|-------------|
| C | 0.60416500  | 1.43032800  | -0.13316000 |
| C | 0.37709100  | 0.00383000  | 0.32353100  |
| H | 0.17169600  | -0.01477200 | 1.40859900  |
| H | -0.27164900 | 2.05589900  | 0.07215600  |
| H | 1.46792500  | 1.86382500  | 0.38326000  |
| H | 0.79900000  | 1.45125800  | -1.21268500 |
| C | 1.54186200  | -0.90195000 | 0.00289900  |
| H | 1.34714300  | -1.92694500 | 0.33392900  |
| H | 1.72054800  | -0.91431100 | -1.07928700 |
| H | 2.45059200  | -0.54179300 | 0.49703300  |
| C | -1.96781200 | -0.08492100 | 0.07927800  |
| H | -2.04448100 | 0.28309900  | 1.10356200  |
| H | -2.81695200 | -0.53125800 | -0.42577200 |
| O | -0.76945700 | -0.55109100 | -0.33951100 |

$\alpha$ -C I<sub>2</sub>

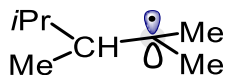

E = -314.8826651

G<sub>Corr.</sub> = 0.192038

|   |             |             |             |
|---|-------------|-------------|-------------|
| C | -1.11029600 | -0.59827500 | -0.03423300 |
| C | -2.53698900 | -0.27038600 | -0.45766300 |
| C | -1.00668000 | -0.71048300 | 1.48196200  |
| H | -0.86156000 | -1.58679700 | -0.45518100 |
| H | -2.61023700 | -0.11065000 | -1.54167700 |
| H | -3.21935300 | -1.08714200 | -0.19134300 |
| H | -2.90567000 | 0.63611300  | 0.04090700  |
| H | -0.01592500 | -1.06165300 | 1.79756000  |
| H | -1.19148500 | 0.25605100  | 1.97115300  |

|   |             |             |             |
|---|-------------|-------------|-------------|
| H | -1.75001900 | -1.41805400 | 1.87020400  |
| C | 1.32916100  | -0.00817500 | -0.28121700 |
| C | -0.39533100 | 1.85137000  | -0.31436600 |
| H | 0.38212900  | 2.51506600  | -0.71145400 |
| H | -1.34667200 | 2.15490400  | -0.76490600 |
| H | -0.46804700 | 2.03828400  | 0.76491900  |
| C | 2.13455500  | 0.64277500  | 0.78984200  |
| H | 1.75210200  | 1.62516500  | 1.08561000  |
| H | 2.17499000  | 0.02317900  | 1.70575500  |
| H | 3.18206200  | 0.77133800  | 0.47581300  |
| C | 1.84228200  | -1.30613600 | -0.80237900 |
| H | 1.34963600  | -1.60087500 | -1.73850300 |
| H | 2.92615600  | -1.26658500 | -0.98422200 |
| H | 1.68567800  | -2.13372200 | -0.08385600 |
| C | -0.07517800 | 0.39425300  | -0.63360800 |
| H | -0.17292900 | 0.27572400  | -1.73080900 |

$\alpha$ -O I<sub>2</sub>

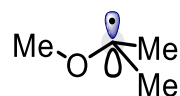

E = -232.912363

G<sub>Corr.</sub> = 0.090838

|   |             |             |             |
|---|-------------|-------------|-------------|
| C | -0.46253900 | 0.00902200  | 0.20110500  |
| C | 1.90398200  | -0.18234000 | 0.05741600  |
| H | 2.01744100  | 0.14488900  | 1.10082800  |
| H | 2.63617800  | -0.96453600 | -0.15438600 |
| H | 2.09354700  | 0.66985800  | -0.60897200 |
| C | -0.42802000 | 1.47753300  | -0.04166100 |
| H | 0.40360900  | 1.98489300  | 0.46208600  |
| H | -0.34503200 | 1.71365200  | -1.12009200 |
| H | -1.35718000 | 1.93056700  | 0.31870600  |
| C | -1.72636300 | -0.74623800 | 0.01627500  |
| H | -1.64012000 | -1.76146000 | 0.41974000  |
| H | -2.55979000 | -0.24119900 | 0.51643300  |
| H | -1.99509400 | -0.84274500 | -1.05220000 |
| O | 0.62801000  | -0.74772300 | -0.16011900 |

$\alpha$ -C TS I<sub>1</sub>-II<sub>1</sub>

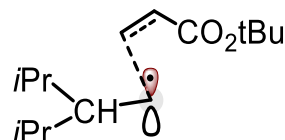

E = -739.1428412

G<sub>Corr.</sub> = 0.358198

|   |             |             |             |
|---|-------------|-------------|-------------|
| C | -3.72050500 | -0.55775500 | 1.57727800  |
| C | -2.22555100 | -0.61730900 | 1.28411000  |
| H | -1.93406900 | -1.68202000 | 1.26259800  |
| H | -4.32445700 | -0.99547100 | 0.77195300  |
| H | -3.94801000 | -1.10872300 | 2.49815900  |
| H | -4.05660100 | 0.47710800  | 1.72879000  |
| C | -1.43353400 | 0.03247600  | 2.41245100  |
| H | -0.35540400 | -0.10989300 | 2.26528300  |
| H | -1.63116400 | 1.11185200  | 2.47780100  |
| H | -1.70328200 | -0.40496500 | 3.38169400  |
| C | -2.24404300 | 1.40593500  | -0.39264200 |
| C | -3.64010800 | 1.55045600  | -0.99482800 |
| C | -1.22094100 | 2.07371300  | -1.30758700 |
| H | -2.23079600 | 1.94673900  | 0.56803300  |
| H | -4.41314000 | 1.04949700  | -0.40330900 |
| H | -3.91229000 | 2.61069800  | -1.07116800 |
| H | -3.67748500 | 1.13278500  | -2.01017700 |
| H | -0.22188800 | 2.09556100  | -0.85115800 |
| H | -1.13259400 | 1.53314700  | -2.26164900 |

|   |             |             |             |
|---|-------------|-------------|-------------|
| H | -1.50961700 | 3.10594300  | -1.54214000 |
| C | -2.16535000 | -0.99324500 | -1.19951700 |
| H | -2.88255900 | -1.79607900 | -1.01999000 |
| H | -2.11913800 | -0.64235200 | -2.22996500 |
| C | -0.33268200 | -2.41049800 | -1.49448100 |
| H | -0.53261500 | -2.89125000 | -0.53846400 |
| H | -0.82529100 | -2.82058900 | -2.37110900 |
| C | 0.72866000  | -1.57153900 | -1.61617300 |
| H | 1.00077100  | -1.12723700 | -2.57153800 |
| C | 1.46851600  | -1.12181300 | -0.43377300 |
| O | 1.34284000  | -1.58418700 | 0.68944700  |
| O | 2.29848100  | -0.11327700 | -0.75782000 |
| C | 3.13109800  | 0.55946900  | 0.23994200  |
| C | 2.27366300  | 1.15206800  | 1.34737200  |
| C | 4.17463500  | -0.40683800 | 0.77362900  |
| C | 3.78605900  | 1.66710500  | -0.56649800 |
| H | 1.43890200  | 1.72576500  | 0.92232500  |
| H | 1.87046600  | 0.38082600  | 2.00808800  |
| H | 2.88586900  | 1.83933700  | 1.94380000  |
| H | 4.75896000  | -0.83006400 | -0.05195700 |
| H | 4.86207900  | 0.13264300  | 1.43655100  |
| H | 3.71386300  | -1.22114400 | 1.33932800  |
| H | 4.46957700  | 2.24046100  | 0.06998200  |
| H | 4.35683300  | 1.24927500  | -1.40351400 |
| H | 3.02770400  | 2.35005700  | -0.96810100 |
| C | -1.81275800 | -0.05644000 | -0.09280900 |
| H | -0.70814000 | -0.00691400 | -0.05201000 |

### $\alpha$ -O TS I<sub>1</sub>-II<sub>1</sub>

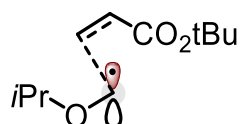

$$E = -657.1845584$$

$$G_{\text{Corr.}} = 0.255107$$

|   |             |             |             |
|---|-------------|-------------|-------------|
| C | -2.67060400 | -2.04283500 | -0.99068400 |
| C | -1.95499300 | -1.08987600 | -0.05701700 |
| H | -1.17917600 | -0.53700300 | -0.61196200 |
| H | -3.15446700 | -1.50687200 | -1.81496500 |
| H | -1.95635000 | -2.75455100 | -1.42122300 |
| H | -3.43683400 | -2.60622500 | -0.44413200 |
| C | -1.35024700 | -1.78394900 | 1.13998100  |
| H | -0.78823100 | -1.07922700 | 1.76290700  |
| H | -2.14143300 | -2.24185800 | 1.74618900  |
| H | -0.66818800 | -2.57857900 | 0.81485100  |
| C | -3.10114100 | 0.96376200  | -0.30479900 |
| H | -2.81194400 | 0.91620300  | -1.35627800 |
| H | -3.97024500 | 1.54711300  | -0.01435100 |
| C | -1.40567300 | 2.56470100  | 0.32403100  |
| H | -1.38431600 | 2.86955900  | -0.71960300 |
| H | -2.11771300 | 3.06138200  | 0.97610200  |
| C | -0.38876200 | 1.82753600  | 0.83714000  |
| H | -0.33268400 | 1.58529800  | 1.89597100  |
| C | 0.60206200  | 1.21801100  | -0.04790500 |
| O | 0.65138200  | 1.37817900  | -1.25878000 |
| O | 1.43315900  | 0.41661100  | 0.64665800  |
| C | 2.48072100  | -0.36600000 | -0.00854300 |
| C | 1.87711500  | -1.33141700 | -1.01765900 |
| C | 3.50579800  | 0.56185400  | -0.63901100 |
| C | 3.09731100  | -1.13399600 | 1.14758100  |
| H | 1.10276700  | -1.94887100 | -0.54261800 |
| H | 1.44103400  | -0.80773200 | -1.87213000 |
| H | 2.66344100  | -2.00331800 | -1.38277200 |
| H | 3.88006300  | 1.27409400  | 0.10593800  |
| H | 4.35546400  | -0.03007100 | -1.00061200 |
| H | 3.08338300  | 1.11647100  | -1.48072900 |
| H | 3.91463700  | -1.76706100 | 0.78361500  |
| H | 3.49852800  | -0.44431200 | 1.89884800  |
| H | 2.34811600  | -1.77472200 | 1.62837100  |
| O | -2.89646300 | -0.12184900 | 0.45585700  |

### $\alpha$ -C TS I<sub>2</sub>-II<sub>2</sub>

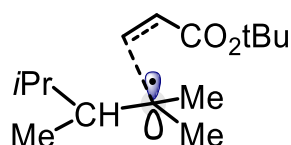

$$E = -739.1518953$$

$$G_{\text{Corr.}} = 0.358605$$

|   |             |             |             |
|---|-------------|-------------|-------------|
| C | 3.72925800  | -0.93368400 | 0.41912200  |
| C | 5.25488400  | -0.97962500 | 0.44942900  |
| C | 3.21035700  | -1.88458600 | -0.65532400 |
| H | 3.38493700  | -1.31321800 | 1.39362500  |
| H | 5.66868000  | -0.26792600 | 1.17567300  |
| H | 5.60325200  | -1.98211500 | 0.72598300  |
| H | 5.68694400  | -0.74727800 | -0.53283900 |
| H | 2.11606200  | -1.94784900 | -0.67317600 |
| H | 3.54706000  | -1.58300400 | -1.65661400 |
| H | 3.59580200  | -2.89676000 | -0.48074600 |
| C | 1.72797800  | 0.70653600  | 0.56614400  |
| C | 0.57686800  | 0.32101600  | -1.41532200 |
| H | 0.48683200  | 1.39919900  | -1.52697500 |
| H | 1.43377100  | -0.15378500 | -1.88317000 |
| C | -0.53115300 | -0.41963700 | -1.12353700 |
| H | -0.51460100 | -1.50767600 | -1.15427400 |
| C | -1.75621800 | 0.21381400  | -0.64340200 |
| O | -1.90521800 | 1.41630700  | -0.48100300 |
| O | -2.70112600 | -0.71227200 | -0.38675000 |
| C | -4.00424700 | -0.35199200 | 0.17081300  |
| C | -3.82508200 | 0.27914000  | 1.54216000  |
| C | -4.76333800 | 0.54819000  | -0.79007200 |
| C | -4.70054700 | -1.69609000 | 0.29517600  |
| H | -3.22014400 | -0.37427500 | 2.18316200  |
| H | -3.34497000 | 1.25887300  | 1.47755500  |
| H | -4.80753700 | 0.40208100  | 2.01403200  |
| H | -4.81202000 | 0.08656300  | -1.78359300 |
| H | -5.78970300 | 0.67743900  | -0.42525600 |
| H | -4.29688500 | 1.53223200  | -0.87773100 |
| H | -5.70491900 | -1.55978600 | 0.71218400  |
| H | -4.79337900 | -2.17466400 | -0.68646800 |
| H | -4.13653700 | -2.36392800 | 0.95638200  |
| C | 3.71660800  | 1.21558400  | -0.96254000 |
| H | 3.31292400  | 2.22820300  | -1.06005100 |
| H | 4.80774200  | 1.30827400  | -0.94909500 |
| H | 3.44609500  | 0.66772900  | -1.87297100 |
| C | 1.29474700  | 2.12782700  | 0.78040700  |
| H | 1.69303600  | 2.82560900  | 0.03595600  |
| H | 0.20192500  | 2.21615600  | 0.77477300  |
| H | 1.65154100  | 2.47025500  | 1.76843000  |
| C | 1.06838400  | -0.23893900 | 1.52207400  |
| H | 1.52387400  | -0.13253200 | 2.52244700  |
| H | 0.00167400  | -0.00507200 | 1.62991400  |
| H | 1.15502600  | -1.29230200 | 1.23508300  |
| C | 3.21281400  | 0.51648200  | 0.30228900  |
| H | 3.68640400  | 1.05306500  | 1.15528300  |

### $\alpha$ -O TS I<sub>2</sub>-II<sub>2</sub>

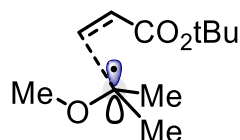

$$E = -657.191497$$

$$G_{\text{Corr.}} = 0.255301$$

|   |             |            |             |
|---|-------------|------------|-------------|
| C | -2.87608000 | 0.17799800 | 0.42237900  |
| C | -1.49402700 | 1.16514300 | -1.29426000 |
| H | -1.67718400 | 0.23320500 | -1.82437900 |



|   |             |             |             |
|---|-------------|-------------|-------------|
| H | -2.22549400 | 1.95808200  | -1.42305900 |
| C | -0.26197400 | 1.43136300  | -0.78804600 |
| H | -0.01577000 | 2.39762900  | -0.35309000 |
| C | 0.74434200  | 0.37914700  | -0.69493000 |
| O | 0.60401700  | -0.76463700 | -1.10887000 |
| O | 1.85027000  | 0.82725700  | -0.06666500 |
| C | 2.97029200  | -0.05792600 | 0.24638000  |
| C | 2.50802100  | -1.17082600 | 1.17376200  |
| C | 3.60296500  | -0.58730800 | -1.03006100 |
| C | 3.93647400  | 0.86332800  | 0.97094700  |
| H | 1.99358500  | -0.74639900 | 2.04524300  |
| H | 1.83480100  | -1.86731000 | 0.66710600  |
| H | 3.38148200  | -1.72828100 | 1.53332500  |
| H | 3.86783900  | 0.24409600  | -1.69425800 |
| H | 4.52399500  | -1.12708300 | -0.77779600 |
| H | 2.93285400  | -1.26700500 | -1.56176900 |
| H | 4.83576800  | 0.30846900  | 1.26197300  |
| H | 4.23532400  | 1.69515900  | 0.32292300  |
| C | 3.47346100  | 1.27518300  | 1.87504800  |
| C | -2.53407000 | -2.07005200 | -0.29802100 |
| H | -1.55530300 | -1.81164900 | -0.72548600 |
| H | -2.39080800 | -2.53756900 | 0.68432700  |
| H | -3.04990500 | -2.77301900 | -0.95452600 |
| C | -1.89828600 | 0.00519300  | 1.53174300  |
| H | -1.01494700 | -0.57678500 | 1.24249900  |
| H | -1.55265200 | 0.98826200  | 1.86834900  |
| H | -2.36771900 | -0.50046100 | 2.39263000  |
| C | -3.91656300 | 1.23360500  | 0.54429100  |
| H | -4.64845700 | 0.97362400  | 1.32727500  |
| H | -3.46507700 | 2.19425400  | 0.81563400  |
| H | -4.46710300 | 1.35121000  | -0.39605900 |
| O | -3.37119400 | -0.92532000 | -0.20334100 |

### Ph<sub>3</sub>Si·

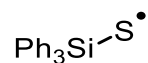

$$E = -1382.281865$$

$$G_{\text{Corr.}} = 0.222907$$

|    |             |             |             |
|----|-------------|-------------|-------------|
| Si | 0.00385900  | -0.00721600 | 0.62072100  |
| S  | 0.15155100  | 0.34503300  | 2.73199200  |
| C  | -1.73835900 | -0.43953200 | 0.08444200  |
| C  | -2.66316400 | -1.02304600 | 0.95910000  |
| C  | -2.13097700 | -0.21613100 | -1.24402400 |
| C  | -3.93791900 | -1.37787100 | 0.52290300  |
| H  | -2.38905800 | -1.19460200 | 2.00039400  |
| C  | -3.40369000 | -0.56787500 | -1.68549000 |
| H  | -1.43383600 | 0.24504100  | -1.94584300 |
| C  | -4.30852100 | -1.15120900 | -0.80056300 |
| H  | -4.64371000 | -1.82771300 | 1.21753300  |
| H  | -3.69092000 | -0.38421800 | -2.71836600 |
| H  | -5.30438800 | -1.42471600 | -1.14181900 |
| C  | 1.21566500  | -1.33130300 | 0.07942100  |
| C  | 2.52127000  | -1.36395600 | 0.59262400  |
| C  | 0.85157100  | -2.29657900 | -0.86939500 |
| C  | 3.43730300  | -2.31876800 | 0.16156200  |
| H  | 2.82290200  | -0.63600300 | 1.34653900  |
| C  | 1.76531900  | -3.25541300 | -1.30285000 |
| H  | -0.15985100 | -2.30464600 | -1.27566400 |
| C  | 3.05911900  | -3.26616200 | -0.78868300 |
| H  | 4.44512100  | -2.32801400 | 0.57049900  |
| H  | 1.46437700  | -3.99721800 | -2.03917900 |
| H  | 3.77223800  | -4.01597200 | -1.12375500 |
| C  | 0.48679800  | 1.68559800  | -0.03844000 |
| C  | -0.39857500 | 2.76598000  | 0.11213100  |
| C  | 1.72487400  | 1.91610000  | -0.65432800 |
| C  | -0.06308600 | 4.03350100  | -0.35278100 |
| H  | -1.36520900 | 2.60998300  | 0.59241000  |
| C  | 2.06115400  | 3.18277400  | -1.12410000 |
| H  | 2.43031900  | 1.09485600  | -0.77929900 |
| C  | 1.16806400  | 4.24200900  | -0.97251100 |
| H  | -0.76082300 | 4.85888400  | -0.23227000 |

|   |            |            |             |
|---|------------|------------|-------------|
| H | 3.02055100 | 3.34407200 | -1.61027300 |
| H | 1.43236400 | 5.23205600 | -1.33697800 |

### TS Ph<sub>3</sub>SiS·-I<sub>1</sub>

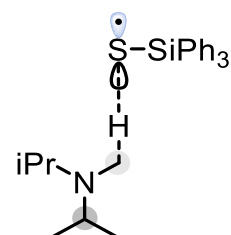

$$E = -1713.855048$$

$$G_{\text{Corr.}} = 0.433982$$

|    |             |             |             |
|----|-------------|-------------|-------------|
| N  | -3.63190000 | 0.13542600  | -0.22152100 |
| C  | -2.39002000 | -0.01008100 | 0.34269600  |
| H  | -2.03037000 | 0.84002800  | 0.92562400  |
| H  | -2.14658000 | -0.99519500 | 0.74191100  |
| C  | -4.31791500 | -1.04725900 | -0.75923300 |
| C  | -4.86259000 | -1.90771700 | 0.37405900  |
| C  | -3.43668300 | -1.85848900 | -1.70258500 |
| H  | -5.17033200 | -0.66748700 | -1.33804600 |
| H  | -5.52510000 | -1.32608700 | 1.02520500  |
| H  | -5.42621100 | -2.75776000 | -0.02763700 |
| H  | -4.04565400 | -2.30937000 | 0.98814800  |
| H  | -3.03542500 | -1.23999000 | -2.51329300 |
| H  | -2.58824800 | -2.30776000 | -1.17009000 |
| H  | -4.02042200 | -2.67317700 | -2.14645200 |
| C  | -4.05843800 | 1.47501800  | -0.63952200 |
| C  | -5.50632100 | 1.74688800  | -0.25832500 |
| C  | -3.79757100 | 1.72356100  | -2.12066700 |
| H  | -3.42441000 | 2.16481800  | -0.06299500 |
| H  | -5.67247600 | 1.56366600  | 0.80906100  |
| H  | -5.75735400 | 2.79176600  | -0.47315100 |
| H  | -6.20544900 | 1.12214900  | -0.82849700 |
| H  | -2.74049500 | 1.56282100  | -2.36613900 |
| H  | -4.40449100 | 1.05875900  | -2.74942100 |
| H  | -4.05811200 | 2.75558600  | -2.38388100 |
| Si | 1.30788200  | 0.00628100  | -0.23093100 |
| S  | -0.08067700 | 0.03479800  | -1.86685100 |
| H  | -1.19059900 | 0.02717000  | -0.90485100 |
| C  | 2.99376900  | -0.49825300 | -0.88293100 |
| C  | 3.59853800  | 0.25293500  | -1.90218500 |
| C  | 3.69526800  | -1.59420100 | -0.36529000 |
| C  | 4.85460200  | -0.08510700 | -2.39598700 |
| H  | 3.07705300  | 1.11648100  | -2.31859500 |
| C  | 4.95535800  | -1.93669700 | -0.85436200 |
| H  | 3.25303500  | -2.19262700 | 0.43150800  |
| C  | 5.53520500  | -1.18344000 | -1.87124500 |
| H  | 5.30481400  | 0.50777200  | -3.18916000 |
| H  | 5.48399100  | -2.79246100 | -0.43996900 |
| H  | 6.51720100  | -1.45021800 | -2.25562400 |
| C  | 1.43616400  | 1.70550100  | 0.56851300  |
| C  | 2.49995700  | 1.98266400  | 1.44061200  |
| C  | 0.48335000  | 2.70887700  | 0.35300200  |
| C  | 2.60488500  | 3.21464600  | 2.08093900  |
| H  | 3.26270500  | 1.22273400  | 1.62166000  |
| C  | 0.58197300  | 3.94448400  | 0.99024100  |
| H  | -0.34200400 | 2.52483700  | -0.33733900 |
| C  | 1.64253000  | 4.19805300  | 1.85653600  |
| H  | 3.43857100  | 3.40971600  | 2.75206400  |
| H  | -0.16656500 | 4.71222000  | 0.80594200  |
| H  | 1.72342500  | 5.16276400  | 2.35257600  |
| C  | 0.68658500  | -1.23338300 | 1.04321700  |
| C  | 0.36623900  | -2.54192200 | 0.64786000  |
| C  | 0.46403500  | -0.87839700 | 2.37971900  |
| C  | -0.16150100 | -3.45997300 | 1.55061600  |
| H  | 0.51526100  | -2.84151800 | -0.39079800 |
| C  | -0.06495700 | -1.79314000 | 3.29027600  |
| H  | 0.69226100  | 0.13339800  | 2.71628800  |

|   |             |             |            |
|---|-------------|-------------|------------|
| C | -0.38149700 | -3.08395600 | 2.87612800 |
| H | -0.40543300 | -4.46784600 | 1.22129400 |
| H | -0.23564600 | -1.49413700 | 4.32224600 |
| H | -0.79893700 | -3.79741700 | 3.58322200 |

**(iPr)<sub>3</sub>GeS·**

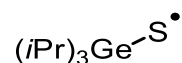

E =

G<sub>Corr.</sub> =

|    |             |             |             |
|----|-------------|-------------|-------------|
| S  | 0.58522100  | -0.16499600 | 2.29279200  |
| C  | -1.95855000 | -0.50696900 | 0.11290500  |
| C  | -2.43603600 | -0.88688200 | -1.28367100 |
| C  | -2.79231500 | 0.62312200  | 0.69734300  |
| H  | -2.03602900 | -1.38622700 | 0.77054000  |
| H  | -1.86684900 | -1.72071900 | -1.71291700 |
| H  | -3.49440200 | -1.18405900 | -1.26893700 |
| H  | -2.35296900 | -0.03891700 | -1.97855300 |
| H  | -2.41989500 | 0.94481400  | 1.67836100  |
| H  | -2.78607400 | 1.49947600  | 0.03320200  |
| H  | -3.84182200 | 0.32025800  | 0.81901300  |
| C  | 0.25522900  | 1.83854300  | -0.35533200 |
| C  | 0.18862300  | 1.98938000  | -1.87074500 |
| C  | 1.54551200  | 2.42068600  | 0.20671600  |
| H  | -0.59353600 | 2.37414200  | 0.09590400  |
| H  | -0.75177000 | 1.60820100  | -2.29106000 |
| H  | 0.27465200  | 3.04522900  | -2.16539900 |
| H  | 1.01115000  | 1.45050900  | -2.36159300 |
| H  | 1.58146000  | 2.36133700  | 1.30236300  |
| H  | 2.43065900  | 1.89779600  | -0.17939000 |
| H  | 1.64606900  | 3.47926100  | -0.07293900 |
| C  | 0.99516000  | -1.32597200 | -0.90608000 |
| C  | 0.76004700  | -2.73063700 | -0.36376700 |
| C  | 2.47994200  | -0.99168600 | -0.90408200 |
| H  | 0.61213300  | -1.26689200 | -1.93850400 |
| H  | -0.29986300 | -3.01653400 | -0.37001200 |
| H  | 1.30710400  | -3.47972500 | -0.95366100 |
| H  | 1.11706300  | -2.80837500 | 0.67322300  |
| H  | 2.69115300  | -0.02030600 | -1.36910000 |
| H  | 2.87329700  | -0.96156700 | 0.12208900  |
| H  | 3.05572200  | -1.75051400 | -1.45329900 |
| Ge | -0.05457700 | -0.04014900 | 0.12300900  |

|    |             |             |             |
|----|-------------|-------------|-------------|
| H  | -5.80391700 | -2.18551800 | -0.64166900 |
| H  | -4.46646700 | -2.64199700 | 0.42547500  |
| H  | -2.84241200 | -0.59460700 | -2.34207400 |
| H  | -2.86184800 | -2.20380500 | -1.59898600 |
| H  | -4.23749000 | -1.67241200 | -2.57795100 |
| C  | -3.22579000 | 1.26900000  | 0.55943400  |
| C  | -4.54675500 | 1.73693200  | 1.15341400  |
| C  | -2.85249200 | 2.05076300  | -0.69539800 |
| H  | -2.43942700 | 1.43881000  | 1.31011200  |
| H  | -4.78584100 | 1.18095100  | 2.06681200  |
| H  | -4.48826100 | 2.80282500  | 1.40169800  |
| H  | -5.37794300 | 1.61279600  | 0.44746400  |
| H  | -1.89249200 | 1.70803200  | -1.10234600 |
| H  | -3.61717500 | 1.94367800  | -1.47601000 |
| H  | -2.76870700 | 3.11910500  | -0.46056100 |
| S  | 0.09683500  | -0.53293300 | -1.39863100 |
| H  | -0.93582000 | -0.70518700 | -0.32179000 |
| C  | 1.49517500  | -1.11794500 | 1.66226500  |
| C  | 2.62215400  | -0.88389800 | 2.66222800  |
| C  | 1.33262200  | -2.60010700 | 1.35906700  |
| H  | 0.55663200  | -0.74572000 | 2.10265600  |
| H  | 2.77010000  | 0.18028100  | 2.89055600  |
| H  | 2.42643400  | -1.40119000 | 3.61278600  |
| H  | 3.57520100  | -1.27512700 | 2.27704900  |
| H  | 0.51251500  | -2.78803300 | 0.65503000  |
| H  | 2.24684300  | -3.01571300 | 0.91090700  |
| H  | 1.13460600  | -3.17576300 | 2.27538000  |
| C  | 3.46036000  | -0.61890300 | -0.85168700 |
| C  | 4.64111900  | 0.17281000  | -0.29825700 |
| C  | 3.40250400  | -0.51386600 | -2.36961400 |
| H  | 3.58740700  | -1.67907000 | -0.57912100 |
| H  | 4.71970600  | 0.11108300  | 0.79500600  |
| H  | 5.59096600  | -0.18933800 | -0.71788900 |
| H  | 4.56101300  | 1.23723100  | -0.56021400 |
| H  | 2.58929600  | -1.11596300 | -2.79147000 |
| H  | 3.23971400  | 0.52434000  | -2.69260400 |
| H  | 4.34525000  | -0.85219800 | -2.82446500 |
| C  | 1.77289900  | 1.84226300  | 0.44378100  |
| C  | 0.54875800  | 2.21601300  | 1.26726300  |
| C  | 1.84704100  | 2.68924800  | -0.81906900 |
| H  | 2.67827400  | 2.01931600  | 1.04753600  |
| H  | 0.46833600  | 1.63666000  | 2.19713300  |
| H  | 0.55896800  | 3.28119600  | 1.54135500  |
| H  | -0.36876000 | 2.04134500  | 0.68591100  |
| H  | 2.75496200  | 2.49369400  | -1.40440300 |
| H  | 0.98605800  | 2.48791800  | -1.47252000 |
| H  | 1.83573800  | 3.76302600  | -0.57973400 |
| Ge | 1.78608100  | -0.07421400 | 0.02668300  |

**TS (iPr)<sub>3</sub>GeS·-I<sub>1</sub>**

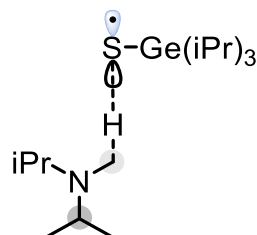

E =

G<sub>Corr.</sub> =

|   |             |             |             |
|---|-------------|-------------|-------------|
| C | -3.86468972 | -2.29018737 | -0.90627693 |
| N | -3.22358100 | -0.17995600 | 0.33423900  |
| C | -2.13298100 | -0.90991800 | 0.74330000  |
| H | -1.64136600 | -0.53939400 | 1.64605400  |
| H | -2.23640800 | -1.99447800 | 0.68354700  |
| C | -4.17281300 | -0.76132400 | -0.62356600 |
| C | -5.05971800 | -1.79363000 | 0.06135300  |
| C | -3.48437700 | -1.33734200 | -1.85542600 |
| H | -4.81298500 | 0.06727800  | -0.95463600 |
| H | -5.58583500 | -1.35316900 | 0.91601100  |

**(iPr)<sub>3</sub>CS·**

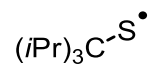

E = -791.6594977

G<sub>Corr.</sub> = 0.250675

|   |             |             |             |
|---|-------------|-------------|-------------|
| S | -0.24571600 | 0.35152300  | 1.92541600  |
| C | 1.56535100  | 0.40237900  | -0.06206400 |
| C | 2.05846200  | 0.26334300  | -1.50130300 |
| C | 2.51735900  | -0.35790400 | 0.86247100  |
| H | 1.65610800  | 1.46098300  | 0.21681400  |
| H | 1.42945300  | 0.79085700  | -2.22746100 |
| H | 3.06870600  | 0.68387200  | -1.57677600 |
| H | 2.12459800  | -0.78877000 | -1.80643400 |
| H | 2.29189700  | -0.19844000 | 1.92482400  |
| H | 2.51037200  | -1.43964300 | 0.67911600  |
| H | 3.54344400  | -0.00915000 | 0.69391000  |
| C | -0.21044700 | -1.46339400 | -0.26023100 |
| C | -0.60951900 | -1.68803100 | -1.72405500 |
| C | -1.18929700 | -2.23431800 | 0.62747400  |
| H | 0.75711900  | -1.97049200 | -0.12920000 |
| H | 0.03842900  | -1.17480200 | -2.44079200 |
| H | -0.55309200 | -2.76052000 | -1.94651100 |

|   |             |             |             |
|---|-------------|-------------|-------------|
| H | -1.64298100 | -1.37587100 | -1.92158200 |
| H | -0.82828900 | -2.32814200 | 1.65499600  |
| H | -2.18037700 | -1.76528800 | 0.66863300  |
| H | -1.32258500 | -3.24581600 | 0.22318200  |
| C | -0.85830500 | 1.03499200  | -0.66746200 |
| C | -0.46412200 | 2.50627400  | -0.55234900 |
| C | -2.34025200 | 0.89854100  | -0.31648200 |
| H | -0.75254600 | 0.76210100  | -1.72761800 |
| H | 0.51112700  | 2.72786300  | -0.99860700 |
| H | -1.20455600 | 3.11897400  | -1.08061600 |
| H | -0.44513100 | 2.83682500  | 0.49375300  |
| H | -2.72218300 | -0.11860400 | -0.44457500 |
| H | -2.53052700 | 1.19979800  | 0.72434200  |
| H | -2.93863300 | 1.55669200  | -0.95770800 |
| C | 0.05095400  | 0.04032000  | 0.12261000  |

### TS (iPr)<sub>3</sub>CS·-I<sub>1</sub>

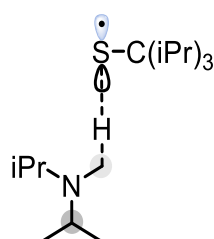

E = -1123.220647

G<sub>Corr.</sub> = 0.460532

|   |             |             |             |
|---|-------------|-------------|-------------|
| N | -2.90944600 | -0.09012600 | 0.37560500  |
| C | -1.74352000 | -0.55660200 | 0.94369500  |
| H | -1.41714900 | -0.00268100 | 1.82747600  |
| H | -1.66754600 | -1.64267500 | 1.03511600  |
| C | -3.64764500 | -0.93812700 | -0.56857500 |
| C | -4.40271300 | -2.03389400 | 0.17382000  |
| C | -2.75707400 | -1.51234300 | -1.66418200 |
| H | -4.38778000 | -0.28396400 | -1.04851400 |
| H | -5.07426400 | -1.60565600 | 0.92670000  |
| H | -4.99902400 | -2.63080800 | -0.52606700 |
| H | -3.70810800 | -2.71402800 | 0.68314700  |
| H | -2.22242200 | -0.72277500 | -2.20446800 |
| H | -2.00927700 | -2.20262200 | -1.25330200 |
| H | -3.36662300 | -2.07145900 | -2.38356900 |
| C | -3.18036100 | 1.35091400  | 0.41023300  |
| C | -4.62085500 | 1.63632100  | 0.81196200  |
| C | -2.80221700 | 2.04331700  | -0.89462200 |
| H | -2.52710500 | 1.74298900  | 1.20355100  |
| H | -4.86921000 | 1.14625000  | 1.75999400  |
| H | -4.76801500 | 2.71580300  | 0.93116900  |
| H | -5.33332300 | 1.29413900  | 0.05049700  |
| H | -1.75084200 | 1.85678100  | -1.14820900 |
| H | -3.42751600 | 1.69379600  | -1.72692500 |
| H | -2.95055700 | 3.12603800  | -0.80369300 |
| S | 0.52367600  | -0.02304500 | -1.07003500 |
| H | -0.54657700 | -0.28283300 | -0.01087100 |
| C | 1.77395900  | -1.10557300 | 1.15492800  |
| C | 2.83824500  | -1.19166200 | 2.25279200  |
| C | 1.49934300  | -2.52750000 | 0.66346400  |
| H | 0.85072700  | -0.77484400 | 1.65007900  |
| H | 3.11059700  | -0.22046100 | 2.68048300  |
| H | 2.45666000  | -1.81370600 | 3.07251000  |
| H | 3.75433000  | -1.67493400 | 1.89072100  |
| H | 0.77271300  | -2.55345200 | -0.15534300 |
| H | 2.41384800  | -3.02962700 | 0.32132500  |
| H | 1.10245600  | -3.12611000 | 1.49382400  |
| C | 3.27208400  | -0.48090900 | -0.84903500 |
| C | 4.63717700  | -0.05432000 | -0.29333800 |
| C | 3.23273500  | -0.10856200 | -2.33457600 |
| H | 3.25943400  | -1.58076000 | -0.83338700 |
| H | 4.76900000  | -0.26732400 | 0.77088900  |
| H | 5.42598500  | -0.59256700 | -0.83355200 |
| H | 4.82328500  | 1.01667300  | -0.44333200 |

|   |            |             |             |
|---|------------|-------------|-------------|
| H | 2.38208800 | -0.56197500 | -2.85200900 |
| H | 3.18654400 | 0.97345400  | -2.50162700 |
| H | 4.14778200 | -0.47586900 | -2.81729800 |
| C | 2.23456900 | 1.37049300  | 0.66068600  |
| C | 1.12591900 | 1.78279200  | 1.62844600  |
| C | 2.41317500 | 2.50236000  | -0.34982300 |
| H | 3.16596900 | 1.32203000  | 1.24674700  |
| H | 1.01612100 | 1.10790000  | 2.48469600  |
| H | 1.34239700 | 2.78038200  | 2.02957700  |
| H | 0.15922200 | 1.83994700  | 1.10881600  |
| H | 3.28316000 | 2.36925700  | -0.99898900 |
| H | 1.52571100 | 2.59883000  | -0.98805900 |
| H | 2.55031900 | 3.45161200  | 0.18322400  |
| C | 2.04622700 | -0.04423100 | 0.03245700  |

### NEtMe<sub>2</sub>

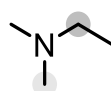

E = -213.686664

H<sub>Corr.</sub> = 0.118215

|   |             |             |             |
|---|-------------|-------------|-------------|
| N | 0.45665100  | -0.00296100 | -0.34575800 |
| C | -0.69783600 | -0.65112700 | 0.26487300  |
| H | -0.68238200 | -1.70399600 | -0.04908500 |
| H | -0.59580600 | -0.65256800 | 1.37375100  |
| C | 1.66283000  | -0.75065900 | -0.04890100 |
| H | 1.56835000  | -1.77965100 | -0.41430100 |
| H | 2.52410600  | -0.28890300 | -0.54480200 |
| H | 1.87550400  | -0.79074300 | 1.04029900  |
| C | 0.60387600  | 1.37117900  | 0.09483400  |
| H | 1.50206900  | 1.80813100  | -0.35531700 |
| H | -0.25227600 | 1.97797400  | -0.21606100 |
| H | 0.70144900  | 1.44674800  | 1.19895400  |
| C | -2.02318500 | -0.03029100 | -0.13001900 |
| H | -2.85262200 | -0.64844900 | 0.22965500  |
| H | -2.15778400 | 0.97117500  | 0.29353900  |
| H | -2.10127300 | 0.04640000  | -1.22104500 |

### NEtMe<sub>2</sub>I<sub>1</sub>

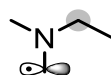

E = -213.029550

H<sub>Corr.</sub> = 0.103418

|   |             |             |             |
|---|-------------|-------------|-------------|
| N | 0.52330700  | -0.06449000 | -0.17053700 |
| C | -0.71818700 | -0.61427400 | 0.35924300  |
| H | -0.71714300 | -1.68703700 | 0.12978700  |
| H | -0.72385100 | -0.52521800 | 1.46304200  |
| C | 1.64059200  | -0.87525200 | -0.08259300 |
| H | 1.48389500  | -1.94454100 | -0.19520700 |
| H | 2.59027600  | -0.44166400 | -0.38306100 |
| C | 0.73331500  | 1.34528500  | 0.08890100  |
| H | 1.67446300  | 1.66323200  | -0.36938800 |
| H | -0.07244400 | 1.94529400  | -0.34482500 |
| H | 0.78493500  | 1.55606600  | 1.17239400  |
| C | -1.95967100 | 0.03037500  | -0.22507800 |
| H | -2.85264900 | -0.50553700 | 0.11316300  |
| H | -2.07174500 | 1.07500900  | 0.08567200  |
| H | -1.93517600 | -0.00098600 | -1.32066000 |

### NEtMe<sub>2</sub>I<sub>2</sub>



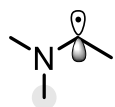

E = -213.031943

H<sub>Corr.</sub> = 0.103496

|   |             |             |             |
|---|-------------|-------------|-------------|
| N | 0.45556700  | -0.03126800 | -0.24330700 |
| C | -0.69506500 | -0.72549700 | 0.12599600  |
| H | -0.60772400 | -1.80665000 | 0.02566500  |
| C | 0.50869100  | 1.38723700  | 0.04834700  |
| H | 1.39087700  | 1.82341500  | -0.43184100 |
| H | -0.37587500 | 1.89750500  | -0.34314400 |
| H | 0.57210300  | 1.58288200  | 1.13558100  |
| C | -2.03115100 | -0.08967300 | -0.00914200 |
| H | -2.81365300 | -0.81605900 | 0.23023100  |
| H | -2.17090400 | 0.76893800  | 0.66365900  |
| H | -2.22874000 | 0.27844700  | -1.03341700 |
| C | 1.70563400  | -0.71034800 | 0.02950300  |
| H | 1.63900900  | -1.75401400 | -0.29483100 |
| H | 2.52023800  | -0.22908100 | -0.52275800 |
| H | 1.95704600  | -0.69682100 | 1.10577700  |

### Me-pyperidine

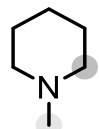

E = -291.077792

H<sub>Corr.</sub> = 0.154896

|   |             |             |             |
|---|-------------|-------------|-------------|
| C | -1.15067600 | -1.24747900 | -0.22619600 |
| C | 0.31474000  | -1.20075300 | 0.17220100  |
| C | 0.31474300  | 1.20075000  | 0.17221200  |
| C | -1.15066600 | 1.24748100  | -0.22620500 |
| C | -1.87776100 | 0.00000600  | 0.25965200  |
| H | 0.39717900  | -1.24288000 | 1.28375700  |
| H | 0.85164900  | -2.07529200 | -0.21951100 |
| H | -1.21834700 | -1.31125400 | -1.32252800 |
| H | -1.61303600 | -2.15597300 | 0.18079000  |
| H | 0.39717500  | 1.24285900  | 1.28376800  |
| H | 0.85166300  | 2.07529000  | -0.21948300 |
| H | -1.61303100 | 2.15598500  | 0.18075100  |
| H | -1.21831700 | 1.31123400  | -1.32254100 |
| H | -1.89987300 | 0.00000900  | 1.36169900  |
| H | -2.92219200 | 0.00000700  | -0.07712600 |
| N | 0.96701400  | 0.00000000  | -0.33383200 |
| C | 2.37452600  | -0.00000100 | 0.00393900  |
| H | 2.86262900  | -0.88826300 | -0.41395400 |
| H | 2.86262800  | 0.88827000  | -0.41393500 |
| H | 2.54334500  | -0.00001400 | 1.10151900  |

### Me-pyperidine I<sub>1</sub>

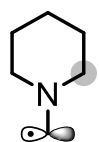

E = -290.420603

H<sub>Corr.</sub> = 0.140606

|   |             |             |             |
|---|-------------|-------------|-------------|
| C | 1.08387200  | 1.24878100  | -0.25846600 |
| C | -0.34508400 | 1.22105900  | 0.25641400  |
| C | -0.34508400 | -1.22105900 | 0.25641400  |

|   |             |             |             |
|---|-------------|-------------|-------------|
| C | 1.08387200  | -1.24878100 | -0.25846600 |
| C | 1.83771900  | 0.00000000  | 0.18137000  |
| H | -0.34669100 | 1.29615700  | 1.36344000  |
| H | -0.91882200 | 2.07397200  | -0.12624700 |
| H | 1.06854500  | 1.30304800  | -1.35731400 |
| H | 1.58191900  | 2.15682300  | 0.10426300  |
| H | -0.34669100 | -1.29615700 | 1.36344000  |
| H | -0.91882200 | -2.07397200 | -0.12624700 |
| H | 1.58191900  | -2.15682300 | 0.10426300  |
| H | 1.06854500  | -1.30304800 | -1.35731400 |
| H | 1.93017100  | 0.00000000  | 1.27973800  |
| H | 2.85808400  | 0.00000000  | -0.22157300 |
| N | -1.02738000 | 0.00000000  | -0.14994300 |
| C | -2.40577000 | 0.00000000  | -0.07800500 |
| H | -2.91182000 | 0.93884000  | -0.28620800 |
| H | -2.91182000 | -0.93884000 | -0.28620800 |

### Me-pyperidine I<sub>2</sub>

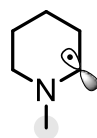

E = -290.422432

H<sub>Corr.</sub> = 0.140366

|   |             |             |             |
|---|-------------|-------------|-------------|
| C | -1.13357800 | -1.21542300 | -0.27099400 |
| C | 0.32935700  | -1.20467700 | 0.13303200  |
| C | 0.29510200  | 1.21887300  | 0.09454700  |
| C | -1.17419600 | 1.26801500  | -0.14952400 |
| C | -1.85787900 | -0.01347300 | 0.31918700  |
| H | 0.41131600  | -1.35887700 | 1.22991000  |
| H | 0.87726600  | -2.02318300 | -0.35203300 |
| H | -1.20544400 | -1.18587400 | -1.36920000 |
| H | -1.59010700 | -2.15734400 | 0.05774200  |
| H | 0.88893500  | 2.12911600  | 0.01657600  |
| H | -1.60094100 | 2.14923100  | 0.34544900  |
| H | -1.38491500 | 1.39296600  | -1.23196100 |
| H | -1.81793000 | -0.06933700 | 1.41832200  |
| H | -2.91674200 | -0.01534900 | 0.03151200  |
| N | 0.97995800  | 0.05037200  | -0.22891400 |
| C | 2.39872100  | 0.05164600  | 0.05431700  |
| H | 2.87845400  | -0.79812700 | -0.44392400 |
| H | 2.85301100  | 0.97409800  | -0.32195900 |
| H | 2.60222700  | -0.01968800 | 1.13857400  |

### Et-pyperidine

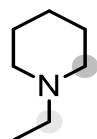

E = -330.371275

H<sub>Corr.</sub> = 0.180962

|   |             |             |             |
|---|-------------|-------------|-------------|
| C | -1.78811400 | -1.04123400 | -0.35270100 |
| C | -0.38644800 | -1.30431100 | 0.16988200  |
| C | 0.08200800  | 1.04119900  | 0.32449900  |
| C | -1.30514000 | 1.39457900  | -0.18678800 |
| C | -2.30493200 | 0.29842600  | 0.15369200  |
| H | -0.42284900 | -1.41297200 | 1.27911200  |
| H | 0.00089200  | -2.25144600 | -0.22923800 |
| H | -1.76208900 | -1.03556100 | -1.45272400 |
| H | -2.45157900 | -1.86100100 | -0.04824500 |
| H | 0.07040100  | 1.01240500  | 1.43963800  |
| H | 0.79425300  | 1.82183500  | 0.03273800  |
| H | -1.61498200 | 2.35754000  | 0.23936200  |
| H | -1.25712400 | 1.52386000  | -1.27847500 |

|   |             |             |             |
|---|-------------|-------------|-------------|
| H | -2.43050900 | 0.24847900  | 1.24764000  |
| H | -3.29272300 | 0.52344600  | -0.26816500 |
| N | 0.53931700  | -0.24023300 | -0.20252900 |
| C | 1.88586600  | -0.56617100 | 0.24998400  |
| H | 2.10133600  | -1.58932700 | -0.08818700 |
| H | 1.92550900  | -0.59070700 | 1.36200500  |
| C | 2.95686900  | 0.36636600  | -0.28345400 |
| H | 2.89440300  | 1.37135100  | 0.14816000  |
| H | 3.95087100  | -0.02629500 | -0.04328600 |
| H | 2.87831300  | 0.45690100  | -1.37332400 |

### Et-piperidine<sub>I</sub>

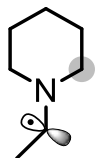

$$E = -329.716513$$

$$H_{\text{Corr.}} = 0.166446$$

|   |             |             |             |
|---|-------------|-------------|-------------|
| C | 1.78219300  | -1.02230300 | 0.32185500  |
| C | 0.40809100  | -1.32585400 | -0.24882300 |
| C | -0.14589000 | 1.03902900  | -0.32965300 |
| C | 1.21918000  | 1.40366300  | 0.23095700  |
| C | 2.25748800  | 0.35122400  | -0.13266300 |
| H | 0.47506800  | -1.41577900 | -1.35333600 |
| H | 0.03183800  | -2.28427200 | 0.12994900  |
| H | 1.72981100  | -1.05088300 | 1.42061100  |
| H | 2.48492800  | -1.80549000 | 0.00988800  |
| H | -0.11774600 | 1.07903200  | -1.43991000 |
| H | -0.89533200 | 1.76631100  | -0.00027300 |
| H | 1.51048400  | 2.39178400  | -0.14763700 |
| H | 1.14447800  | 1.48466200  | 1.32578700  |
| H | 2.39889800  | 0.34271500  | -1.22578900 |
| H | 3.23120900  | 0.59490000  | 0.31039900  |
| N | -0.55807200 | -0.29168700 | 0.10241500  |
| C | -1.89345700 | -0.64748300 | -0.07174900 |
| H | -2.09334100 | -1.70466500 | 0.09870500  |
| C | -2.98165000 | 0.34000200  | 0.14951400  |
| H | -2.99857800 | 1.14596100  | -0.59887000 |
| H | -3.95185300 | -0.16348100 | 0.09863400  |
| H | -2.91908600 | 0.83135400  | 1.13830600  |

### Et-piperidine<sub>I</sub>

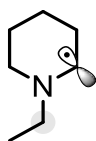

$$E = -329.715910$$

$$H_{\text{Corr.}} = 0.16626$$

|   |             |             |             |
|---|-------------|-------------|-------------|
| C | 1.77749100  | -1.00613200 | 0.39009200  |
| C | 0.38707000  | -1.31629400 | -0.13295200 |
| C | -0.07432000 | 1.05136400  | -0.25335600 |
| C | 1.32458100  | 1.41817500  | 0.10761300  |
| C | 2.29880300  | 0.28932200  | -0.21466300 |
| H | 0.44258500  | -1.53116200 | -1.22107100 |
| H | -0.02092800 | -2.21075200 | 0.35539300  |
| H | 1.73756900  | -0.91080100 | 1.48622500  |
| H | 2.44189200  | -1.84928700 | 0.16275000  |
| H | -0.82938200 | 1.83163400  | -0.31255800 |
| H | 1.60534200  | 2.34489200  | -0.40798900 |
| H | 1.39976200  | 1.63688300  | 1.19307700  |
| H | 2.37823300  | 0.17428300  | -1.30700400 |
| H | 3.30270500  | 0.52212000  | 0.16233100  |

|   |             |             |             |
|---|-------------|-------------|-------------|
| N | -0.54237100 | -0.21234200 | 0.09812300  |
| C | -2.95368500 | 0.38975800  | 0.28280100  |
| H | -2.89886300 | 1.40165200  | -0.13228900 |
| H | -3.95518800 | 0.00430000  | 0.06422400  |
| H | -2.84202700 | 0.45964500  | 1.37109500  |
| C | -1.90674900 | -0.53805200 | -0.30195100 |
| H | -2.10184600 | -1.56255100 | 0.04110200  |
| H | -1.98240900 | -0.55331100 | -1.40764000 |

### NEt(iPr)<sub>2</sub>

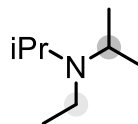

$$E = -370.859482$$

$$H_{\text{Corr.}} = 0.222521$$

|   |             |             |             |
|---|-------------|-------------|-------------|
| N | -0.01030600 | 0.26664800  | 0.15228900  |
| C | -0.39931500 | 1.40802600  | -0.66088400 |
| H | -1.48929700 | 1.39264200  | -0.78522300 |
| H | 0.01771800  | 1.34627700  | -1.68682600 |
| C | 1.40635500  | -0.09178200 | 0.04873900  |
| C | 1.76526300  | -0.99972400 | -1.12901100 |
| C | 1.92363500  | -0.67100400 | 1.35913300  |
| H | 1.93450600  | 0.86157500  | -0.10722400 |
| H | 1.40279200  | -0.59240400 | -2.08101100 |
| H | 2.85410900  | -1.10945000 | -1.20669600 |
| H | 1.34365100  | -2.00587500 | -1.00271600 |
| H | 1.71133000  | 0.01112000  | 2.19028500  |
| H | 1.45789500  | -1.63902100 | 1.58719300  |
| H | 3.00675700  | -0.83730700 | 1.30836200  |
| C | -0.97321700 | -0.83722200 | 0.22124600  |
| C | -1.58547500 | -1.27053200 | -1.11401500 |
| C | -2.06952400 | -0.50537800 | 1.22711800  |
| H | -0.41924600 | -1.70041600 | 0.61864500  |
| H | -0.82191500 | -1.47124700 | -1.87319600 |
| H | -2.17372200 | -2.18629800 | -0.97625700 |
| H | -2.26702900 | -0.50838800 | -1.51345200 |
| H | -1.63686700 | -0.31496400 | 2.21600500  |
| H | -2.62045000 | 0.39529400  | 0.92209100  |
| H | -2.79530800 | -1.32439100 | 1.31068000  |
| C | -0.01445200 | 2.73310800  | -0.02281400 |
| H | 1.06646300  | 2.80666400  | 0.14821400  |
| H | -0.30583300 | 3.57655900  | -0.66038000 |
| H | -0.51302800 | 2.84014300  | 0.94841500  |

### NEt(iPr)<sub>2</sub><sub>I</sub>

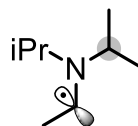

$$E = -370.209413$$

$$H_{\text{Corr.}} = 0.2081$$

|   |             |             |             |
|---|-------------|-------------|-------------|
| N | 0.01600000  | 0.23155900  | 0.22770900  |
| C | 0.08725300  | 1.59706500  | -0.03512000 |
| H | -0.87255600 | 2.10913800  | -0.01960800 |
| C | 1.23744100  | -0.57201000 | 0.11632500  |
| C | 1.52966400  | -1.00560400 | -1.31777700 |
| C | 1.23337800  | -1.75568000 | 1.07436000  |
| H | 2.05343700  | 0.08679000  | 0.43996200  |
| H | 1.54020800  | -0.13778500 | -1.98928400 |
| H | 2.50448200  | -1.50472600 | -1.38153000 |
| H | 0.77155800  | -1.71237300 | -1.68150100 |
| H | 0.99552600  | -1.43162500 | 2.09403700  |
| H | 0.51224600  | -2.52957700 | 0.78264800  |

|   |             |             |             |
|---|-------------|-------------|-------------|
| H | 2.22298400  | -2.22751700 | 1.08342100  |
| C | -1.26693200 | -0.43571200 | -0.03503700 |
| C | -1.89471100 | -0.06988900 | -1.37878400 |
| C | -2.24001000 | -0.19141100 | 1.11215700  |
| H | -1.05268300 | -1.51216900 | -0.06190000 |
| H | -1.17782800 | -0.18115800 | -2.19994200 |
| H | -2.75254000 | -0.72382100 | -1.57724100 |
| H | -2.25841100 | 0.96448300  | -1.38810200 |
| H | -1.81523700 | -0.53770800 | 2.06147400  |
| H | -2.46603100 | 0.87806000  | 1.21199800  |
| H | -3.18620700 | -0.71869600 | 0.93910300  |
| C | 1.30630600  | 2.38507100  | 0.28994500  |
| H | 2.17417400  | 2.13423000  | -0.34007700 |
| H | 1.10296600  | 3.44973200  | 0.13727000  |
| H | 1.63757300  | 2.26282900  | 1.33890500  |

### NEt(iPr)<sub>2</sub>I<sub>2</sub>

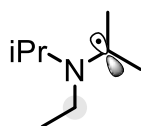

E = -370.205607

H<sub>Corr.</sub> = 0.206858

|   |             |             |             |
|---|-------------|-------------|-------------|
| N | -0.29638700 | 0.22939400  | -0.20477600 |
| C | -0.44269900 | -1.14369100 | 0.33826700  |
| C | 0.42466200  | -1.36434800 | 1.57230600  |
| C | -0.21860300 | -2.22094200 | -0.71251400 |
| H | -1.49415000 | -1.22123500 | 0.65315800  |
| H | 0.23634400  | -0.59489500 | 2.33191200  |
| H | 0.21982900  | -2.34363400 | 2.02184100  |
| H | 1.49179800  | -1.33130700 | 1.31449000  |
| H | -0.83174500 | -2.02518200 | -1.60034300 |
| H | 0.83049300  | -2.27328100 | -1.02582800 |
| H | -0.49238200 | -3.20430200 | -0.31012000 |
| C | 0.99979300  | 0.76339900  | -0.32161700 |
| C | 1.55563500  | 1.73900100  | 0.66667000  |
| C | 1.96586600  | 0.13427500  | -1.26412700 |
| H | 0.79554800  | 2.14843300  | 1.34064000  |
| H | 2.32457100  | 1.26127300  | 1.30425500  |
| H | 2.05847300  | 2.58385900  | 0.17224800  |
| H | 1.45905400  | -0.29896700 | -2.13433300 |
| H | 2.68539500  | 0.88444500  | -1.62373600 |
| H | 2.57587200  | -0.66668000 | -0.80271000 |
| C | -2.65901000 | 0.90203200  | -0.46722400 |
| H | -3.03554800 | -0.11560300 | -0.30695000 |
| H | -3.42724300 | 1.59780900  | -0.10943600 |
| H | -2.53498900 | 1.04539000  | -1.54680000 |
| C | -1.34058600 | 1.14119800  | 0.25002000  |
| H | -1.00735500 | 2.16421500  | 0.03799400  |
| H | -1.48961100 | 1.07837000  | 1.34647800  |

### Benzylamine

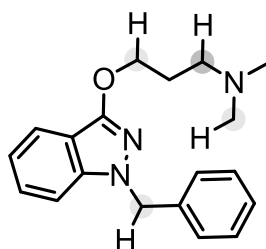

E = -976.895668

H<sub>Corr.</sub> = 0.410364

|   |             |            |            |
|---|-------------|------------|------------|
| O | -1.60801300 | 1.06745000 | 0.01901800 |
|---|-------------|------------|------------|

|   |             |             |             |
|---|-------------|-------------|-------------|
| N | 1.55479400  | 0.31126900  | -1.10705400 |
| N | 0.23037600  | -0.01654400 | -0.94976000 |
| C | -0.31144600 | 0.99058400  | -0.30141200 |
| C | 0.64060500  | 2.00490100  | 0.01824100  |
| C | 1.84667300  | 1.50415000  | -0.51129500 |
| C | 3.19255200  | -1.45721000 | -0.51216400 |
| C | -2.42170700 | -0.03823800 | -0.37723600 |
| H | -2.02611800 | -0.95884400 | 0.07848700  |
| H | -2.35911300 | -0.15904800 | -1.46887300 |
| C | 2.73057800  | -1.47942500 | 0.80364900  |
| H | 1.84561100  | -0.90645500 | 1.07612900  |
| C | 2.48147200  | -0.67856100 | -1.59443600 |
| H | 3.21613900  | -0.18145500 | -2.24343800 |
| H | 1.90262300  | -1.35381000 | -2.23648400 |
| C | 1.79395200  | 3.94114500  | 0.79879300  |
| H | 1.80600200  | 4.90268100  | 1.30547800  |
| C | 3.39640400  | -2.23003200 | 1.77061000  |
| H | 3.02750900  | -2.23726400 | 2.79369700  |
| C | 4.33240900  | -2.19296700 | -0.84433300 |
| H | 4.70319100  | -2.17286400 | -1.86927300 |
| C | -3.83442900 | 0.24184800  | 0.07283900  |
| H | -3.82027700 | 0.45603500  | 1.14982600  |
| H | -4.21624100 | 1.13850100  | -0.43458300 |
| C | -4.73761000 | -0.93989700 | -0.23869200 |
| H | -4.57998700 | -1.24717200 | -1.28378800 |
| H | -4.44228600 | -1.80982200 | 0.39228000  |
| C | 3.05420000  | 2.20459700  | -0.37734000 |
| H | 3.99077800  | 1.80971600  | -0.76417600 |
| C | 4.52859600  | -2.96615800 | 1.43226800  |
| H | 5.04755700  | -3.55030000 | 2.18848900  |
| C | 0.60735500  | 3.24119500  | 0.67522900  |
| H | -0.32526900 | 3.63055600  | 1.07674100  |
| C | 3.00045200  | 3.42111700  | 0.27985000  |
| H | 3.91640600  | 3.99418500  | 0.40476100  |
| C | 4.99614300  | -2.94586300 | 0.11929700  |
| H | 5.88323100  | -3.51301000 | -0.15343000 |
| N | -6.15426400 | -0.65031300 | -0.07984300 |
| C | -6.94622200 | -1.77448400 | -0.54191700 |
| H | -6.75489200 | -2.69457300 | 0.04891500  |
| H | -6.71779200 | -1.99031200 | -1.59183800 |
| H | -8.01333000 | -1.53804800 | -0.46534400 |
| C | -6.49289300 | -0.33453700 | 1.29567700  |
| H | -7.57230300 | -0.16736100 | 1.37860100  |
| H | -5.98932100 | 0.57991100  | 1.62482500  |
| H | -6.21685700 | -1.15472700 | 1.99169300  |

### Benzylamine I<sub>1</sub>

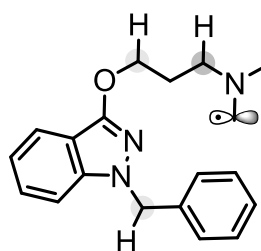

E = -976.238166

H<sub>Corr.</sub> = 0.397017

|   |             |             |             |
|---|-------------|-------------|-------------|
| O | -1.66536000 | 1.00675100  | 0.02336600  |
| N | 1.50969700  | 0.31028600  | -1.10634800 |
| N | 0.19232300  | -0.04209900 | -0.94640100 |
| C | -0.36730800 | 0.95559700  | -0.29892500 |
| C | 0.56523600  | 1.98851900  | 0.01746100  |
| C | 1.77975300  | 1.50965800  | -0.51329300 |
| C | 3.18161900  | -1.42669000 | -0.51366600 |
| C | -2.45454800 | -0.11725500 | -0.36760300 |
| H | -2.03894100 | -1.02788500 | 0.09008300  |
| H | -2.39269100 | -0.24074900 | -1.45899800 |
| C | 2.72722500  | -1.45063300 | 0.80471700  |
| H | 1.83548500  | -0.88959400 | 1.08003900  |
| C | 2.45396800  | -0.66224500 | -1.59504600 |

|   |             |             |             |
|---|-------------|-------------|-------------|
| H | 3.17774300  | -0.15152400 | -2.24568200 |
| H | 1.88682200  | -1.34857200 | -2.23574900 |
| C | 1.68365300  | 3.94685800  | 0.79368500  |
| H | 1.67866000  | 4.90907000  | 1.29917700  |
| C | 3.40931900  | -2.18766800 | 1.77081200  |
| H | 3.04622200  | -2.19641100 | 2.79594800  |
| C | 4.33019900  | -2.14708700 | -0.84947800 |
| H | 4.69491600  | -2.12564600 | -1.87655800 |
| C | -3.87156300 | 0.13559900  | 0.08605700  |
| H | -3.85883800 | 0.34522100  | 1.16392700  |
| H | -4.26963300 | 1.02781500  | -0.41653200 |
| C | -4.75065700 | -1.06388500 | -0.22695200 |
| H | -4.62806000 | -1.34005500 | -1.28340900 |
| H | -4.42237400 | -1.93835600 | 0.37006600  |
| C | 2.97429400  | 2.23253900  | -0.38202400 |
| H | 3.91749800  | 1.85442600  | -0.76949500 |
| C | 4.55028700  | -2.90838700 | 1.42893900  |
| H | 5.08194400  | -3.48191800 | 2.18444800  |
| C | 0.51007800  | 3.22501900  | 0.67291800  |
| H | -0.42883100 | 3.59768500  | 1.07560600  |
| C | 2.89890000  | 3.44864300  | 0.27363700  |
| H | 3.80420500  | 4.03875700  | 0.39659300  |
| C | 5.01018900  | -2.88638800 | 0.11328100  |
| H | 5.90388500  | -3.44164900 | -0.16226800 |
| N | -6.16627500 | -0.81464900 | -0.00848400 |
| C | -7.04451800 | -1.63456800 | -0.69569200 |
| H | -6.74445100 | -1.95510000 | -1.68949900 |
| H | -8.10073100 | -1.52539300 | -0.46699800 |
| C | -6.53017500 | -0.48398800 | 1.35517900  |
| H | -7.60857100 | -0.30947400 | 1.40980300  |
| H | -6.02418900 | 0.42907400  | 1.68357900  |
| H | -6.27310000 | -1.30033100 | 2.05358200  |

**Benzylamine I<sub>2</sub>**

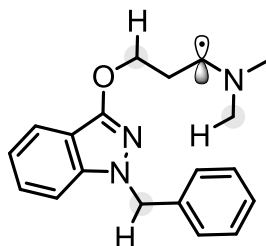

E = -976.240946

H<sub>Corr.</sub> = 0.397041

|   |             |             |             |
|---|-------------|-------------|-------------|
| O | -1.64271500 | 1.05973600  | 0.01280400  |
| N | 1.52121900  | 0.30317600  | -1.10936600 |
| N | 0.19668800  | -0.02519700 | -0.95277800 |
| C | -0.34627400 | 0.98244000  | -0.30608200 |
| C | 0.60527900  | 1.99754700  | 0.01326700  |
| C | 1.81207700  | 1.49668200  | -0.51446300 |
| C | 3.16382500  | -1.45739000 | -0.50578600 |
| C | -2.45515400 | -0.04942000 | -0.37562200 |
| H | -2.06524300 | -0.96763900 | 0.08702600  |
| H | -2.39582400 | -0.17649900 | -1.46655900 |
| C | 2.69274400  | -1.48623500 | 0.80675800  |
| H | 1.79854700  | -0.92474800 | 1.07296800  |
| C | 2.44930100  | -0.68770600 | -1.59215200 |
| H | 3.18186500  | -0.19363400 | -2.24585000 |
| H | 1.87023600  | -1.36827700 | -2.22834800 |
| C | 1.75727400  | 3.93498400  | 0.79315200  |
| H | 1.76845900  | 4.89696600  | 1.29904000  |
| C | 3.36104500  | -2.22890800 | 1.77800100  |
| H | 2.98490500  | -2.24157100 | 2.79839000  |
| C | 4.31531300  | -2.17821300 | -0.83015900 |
| H | 4.69334000  | -2.15247800 | -1.85231500 |
| C | -3.86862500 | 0.23591100  | 0.07336900  |
| H | -3.85658200 | 0.41616400  | 1.16025400  |
| H | -4.19957000 | 1.18778100  | -0.38691200 |
| C | -4.76359800 | -0.89689500 | -0.29077600 |

|   |             |             |             |
|---|-------------|-------------|-------------|
| H | -4.49043100 | -1.52489200 | -1.14052700 |
| C | 3.01922600  | 2.19767000  | -0.37992600 |
| H | 3.95632700  | 1.80263000  | -0.76536000 |
| C | 4.50486800  | -2.95052600 | 1.44731200  |
| H | 5.02569900  | -3.52857100 | 2.20693700  |
| C | 0.57102000  | 3.23442500  | 0.66896000  |
| H | -0.36212800 | 3.62375900  | 1.06930500  |
| C | 2.96446600  | 3.41487200  | 0.27599700  |
| H | 3.88013700  | 3.98831200  | 0.40135600  |
| C | 4.98157700  | -2.92341800 | 0.13782800  |
| H | 5.87781000  | -3.47898600 | -0.12879500 |
| N | -6.13292000 | -0.81568700 | -0.06368400 |
| C | -6.58181300 | -0.14782300 | 1.14185900  |
| H | -7.66944900 | -0.02846600 | 1.10472000  |
| H | -6.13630300 | 0.84767300  | 1.22341300  |
| H | -6.32529700 | -0.72222100 | 2.05142300  |
| C | -6.88659700 | -2.01643700 | -0.36379000 |
| H | -7.95460000 | -1.78047600 | -0.42271900 |
| H | -6.56905300 | -2.42125300 | -1.33015900 |
| H | -6.74175300 | -2.79687300 | 0.40461300  |

**Benzylamine I<sub>3</sub>**

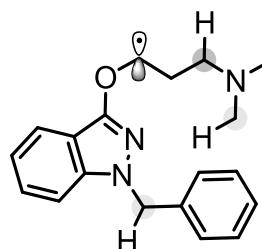

E = -976.232079

H<sub>Corr.</sub> = 0.396224

|   |             |             |             |
|---|-------------|-------------|-------------|
| O | -1.62281500 | 1.14168800  | -0.01936100 |
| N | 1.53555900  | 0.31341500  | -1.11029800 |
| N | 0.20448600  | 0.01771400  | -0.97679700 |
| C | -0.31723600 | 1.03353500  | -0.32765500 |
| C | 0.64808300  | 2.02344700  | 0.01282600  |
| C | 1.84898500  | 1.49625500  | -0.50388200 |
| C | 3.14347500  | -1.48160800 | -0.52268500 |
| C | -2.47902700 | 0.13262500  | -0.37301200 |
| H | -2.03004100 | -0.83022300 | -0.60801800 |
| C | 2.65205800  | -1.53532200 | 0.78169800  |
| H | 1.75544700  | -0.97654000 | 1.04590500  |
| C | 2.44566600  | -0.69011100 | -1.60390200 |
| H | 3.18732900  | -0.20281400 | -2.25214200 |
| H | 1.85320800  | -1.35262500 | -2.24655300 |
| C | 1.83957500  | 3.92368100  | 0.82219400  |
| H | 1.86912900  | 4.88101200  | 1.33599500  |
| C | 3.30325900  | -2.29939500 | 1.74778400  |
| H | 2.91150600  | -2.33158800 | 2.76181600  |
| C | 4.29819700  | -2.19838400 | -0.84397500 |
| H | 4.69231200  | -2.15274500 | -1.85926300 |
| C | -3.86431800 | 0.31374700  | 0.10798100  |
| H | -3.86167200 | 0.45228300  | 1.20438900  |
| H | -4.30209200 | 1.23560600  | -0.30973000 |
| C | 3.07180100  | 2.16490400  | -0.34997800 |
| H | 4.00281600  | 1.74906400  | -0.72795600 |
| C | 4.45019000  | -3.01746400 | 1.41996500  |
| H | 4.95777300  | -3.61222400 | 2.17559800  |
| C | 0.63726900  | 3.25560800  | 0.67920100  |
| H | -0.28994700 | 3.66592500  | 1.07197800  |
| C | 3.03972800  | 3.37783300  | 0.31480300  |
| H | 3.96763800  | 3.92732200  | 0.45553800  |
| C | 4.94733100  | -2.96506400 | 0.11897000  |
| H | 5.84633700  | -3.51738700 | -0.14489000 |
| N | -6.15099700 | -0.65456800 | -0.06445000 |
| C | -6.46685000 | -0.48281800 | 1.34169100  |
| H | -7.54930200 | -0.36597300 | 1.46277000  |
| H | -5.98939100 | 0.41561600  | 1.74570700  |

|   |             |             |             |
|---|-------------|-------------|-------------|
| H | -6.14373400 | -1.35326800 | 1.95082700  |
| C | -6.91447900 | -1.75847600 | -0.61504800 |
| H | -7.98689600 | -1.57044400 | -0.49251400 |
| H | -6.70525500 | -1.86444100 | -1.68550100 |
| H | -6.67587700 | -2.72277400 | -0.11973600 |
| C | -4.73058700 | -0.87371900 | -0.28310600 |
| H | -4.38292300 | -1.78089800 | 0.26215300  |
| H | -4.58590700 | -1.07796100 | -1.35389500 |

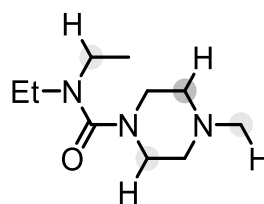

$$E = -632.953165$$

$$H_{\text{Corr.}} = 0.32961$$

|   |             |             |             |
|---|-------------|-------------|-------------|
| O | 0.48507200  | -1.93854400 | -0.65798400 |
| N | 1.82739400  | -0.14260500 | -0.23323500 |
| N | -0.37430300 | 0.15596400  | -1.01889500 |
| N | -2.92100400 | 0.41863600  | 0.27907500  |
| C | 2.88810600  | 2.06346300  | 0.20912100  |
| H | 2.10277100  | 2.37446700  | 0.90887100  |
| H | 3.28462600  | 2.95924000  | -0.28107800 |
| H | 3.69999800  | 1.62428900  | 0.80106500  |
| C | 2.36312600  | 1.08289500  | -0.82453300 |
| H | 3.17813800  | 0.80635500  | -1.51369800 |
| H | 1.58661300  | 1.54165400  | -1.44318200 |
| C | 0.63771300  | -0.71719000 | -0.63417100 |
| C | -0.70117500 | 1.33317300  | -0.21385700 |
| H | -1.11508700 | 2.10427400  | -0.87978900 |
| H | 0.19715500  | 1.73787100  | 0.25515600  |
| C | -1.71393000 | 0.98123900  | 0.86162400  |
| H | -1.24351500 | 0.26393900  | 1.57474400  |
| H | -1.97971000 | 1.88262300  | 1.43029300  |
| C | -3.90014300 | 0.12162800  | 1.30451500  |
| H | -3.52939000 | -0.62725800 | 2.03390400  |
| H | -4.81373400 | -0.27338500 | 0.84569100  |
| H | -4.15814400 | 1.03485400  | 1.85327300  |
| C | -2.59585000 | -0.77633600 | -0.49137000 |
| H | -3.51742200 | -1.16151600 | -0.94779500 |
| H | -2.18836400 | -1.57199400 | 0.16757600  |
| C | -1.58111600 | -0.45322600 | -1.57250100 |
| H | -1.30270100 | -1.35694100 | -2.11881200 |
| H | -2.01777800 | 0.26640800  | -2.27975100 |
| C | 2.80687200  | -1.05211300 | 0.36512400  |
| H | 3.79356500  | -0.58739100 | 0.25328900  |
| H | 2.82374500  | -1.99182000 | -0.20005200 |
| C | 2.51198800  | -1.31544900 | 1.82996100  |
| H | 2.52028000  | -0.37915600 | 2.40210100  |
| H | 3.25537900  | -1.99302800 | 2.26484700  |
| H | 1.52485000  | -1.77760300 | 1.94512100  |

### Benzylamine I4

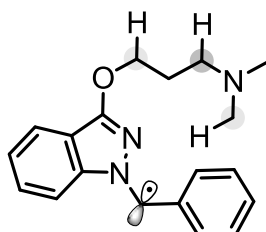

$$E = -976.256496$$

$$H_{\text{Corr.}} = 0.397174$$

|   |             |             |             |
|---|-------------|-------------|-------------|
| O | -1.34665400 | 1.37601600  | -0.07045300 |
| N | 1.99142100  | 0.55964200  | 0.00194300  |
| N | 0.66628100  | 0.19544100  | -0.02216300 |
| C | -0.01670500 | 1.31879000  | -0.04354700 |
| C | 0.82353400  | 2.47288500  | -0.03450200 |
| C | 2.12333500  | 1.93856500  | -0.00463400 |
| C | 2.97986100  | -1.75570700 | 0.03080100  |
| C | 1.81001800  | -2.56198000 | 0.00208700  |
| H | 0.83659300  | -2.08509800 | -0.02315800 |
| C | 3.02706600  | -0.34238000 | 0.02931900  |
| H | 4.00040600  | 0.13984400  | 0.05123500  |
| C | 1.72966100  | 4.67633200  | -0.03219400 |
| H | 1.60772100  | 5.75618800  | -0.04263300 |
| C | 1.91009000  | -3.94527700 | 0.00579300  |
| H | 0.99874700  | -4.53951600 | -0.01692000 |
| C | 4.23412400  | -2.42786800 | 0.06368800  |
| H | 5.14648100  | -1.83293700 | 0.08635000  |
| C | -3.51822500 | 0.41427900  | -0.10934200 |
| H | -3.75583200 | 1.08857700  | 0.72412300  |
| H | -3.77509400 | 0.93923300  | -1.03968000 |
| C | 3.25319300  | 2.76304400  | 0.01206000  |
| H | 4.26363700  | 2.36404000  | 0.03490300  |
| C | 3.15157800  | -4.58431800 | 0.03795600  |
| H | 3.21335800  | -5.66970300 | 0.04043200  |
| C | 0.61551600  | 3.85521600  | -0.04871200 |
| H | -0.39183100 | 4.26347300  | -0.07239700 |
| C | 3.02987500  | 4.13016800  | -0.00208400 |
| H | 3.88417300  | 4.80276600  | 0.01018000  |
| C | 4.31529500  | -3.80735000 | 0.06703600  |
| H | 5.29114100  | -4.28742600 | 0.09243300  |
| N | -5.73452100 | -0.70101700 | -0.30430900 |
| C | -6.38464600 | 0.15891300  | 0.66766200  |
| H | -7.45435300 | 0.22476900  | 0.44137600  |
| H | -5.97528300 | 1.17347800  | 0.63160000  |
| H | -6.27462700 | -0.22529900 | 1.70372000  |
| C | -6.39436900 | -1.99238100 | -0.34719300 |
| H | -7.45052400 | -1.86493100 | -0.60923500 |
| H | -5.92746900 | -2.62915600 | -1.10715900 |
| H | -6.34345800 | -2.52301300 | 0.62641800  |
| C | -4.31927800 | -0.87389900 | -0.01717600 |
| H | -4.17575700 | -1.32943900 | 0.98975400  |
| H | -3.92178200 | -1.59766700 | -0.74489600 |
| C | -2.03871500 | 0.12178300  | -0.07798300 |
| H | -1.75519300 | -0.44846800 | 0.81951000  |
| H | -1.71732900 | -0.45918900 | -0.95483200 |

### Diethylcarbamazine

### Diethylcarbamazine I1

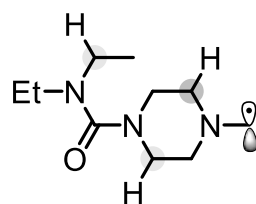

$$E = -632.294933$$

$$H_{\text{Corr.}} = 0.316117$$

|   |             |             |             |
|---|-------------|-------------|-------------|
| O | 0.44178100  | -1.97532300 | -0.51259400 |
| N | 1.79174100  | -0.15533100 | -0.24637300 |
| N | -0.42974800 | 0.08970700  | -0.99513000 |
| N | -2.90445100 | 0.34080800  | 0.39551100  |
| C | 2.84292200  | 2.08052500  | 0.04600800  |
| H | 2.07232000  | 2.42368300  | 0.74711400  |
| H | 3.21802800  | 2.95053300  | -0.50366500 |
| H | 3.67359100  | 1.68238100  | 0.64076600  |
| C | 2.30303900  | 1.03897800  | -0.91789400 |
| H | 3.10479800  | 0.72927000  | -1.60828200 |

|   |             |             |             |
|---|-------------|-------------|-------------|
| H | 1.50912000  | 1.45556300  | -1.54424000 |
| C | 0.59535400  | -0.75590600 | -0.57578300 |
| C | -0.75092000 | 1.30594900  | -0.24833800 |
| H | -1.20906300 | 2.02550200  | -0.94220100 |
| H | 0.15522000  | 1.75898500  | 0.15733100  |
| C | -1.70789700 | 0.99900600  | 0.89104400  |
| H | -1.19409400 | 0.35546700  | 1.63561200  |
| H | -2.00136900 | 1.92647400  | 1.39798400  |
| C | -3.99849300 | 0.30860800  | 1.23843000  |
| H | -4.85192500 | -0.28114500 | 0.91600900  |
| H | -4.15121300 | 1.16982500  | 1.88314500  |
| C | -2.61573600 | -0.86851100 | -0.36530000 |
| H | -3.55741500 | -1.25294200 | -0.77559600 |
| H | -2.18861800 | -1.64406000 | 0.29628900  |
| C | -1.64063900 | -0.56193400 | -1.48777200 |
| H | -1.36256800 | -1.48084600 | -2.00838800 |
| H | -2.11080100 | 0.12236900  | -2.20829000 |
| C | 2.79063900  | -1.01901900 | 0.38745200  |
| H | 3.77299000  | -0.56610000 | 0.20854400  |
| H | 2.78894700  | -1.99806100 | -0.10638300 |
| C | 2.54273900  | -1.17190300 | 1.87648500  |
| H | 2.56685800  | -0.19575400 | 2.37695800  |
| H | 3.30109800  | -1.81511500 | 2.33676100  |
| H | 1.56100700  | -1.62448400 | 2.05722500  |

### Diethylcarbamazine<sub>I</sub><sub>2</sub>

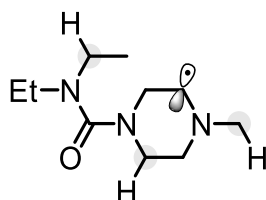

$$E = -632.296589$$

$$H_{\text{Corr.}} = 0.31644$$

|   |             |             |             |
|---|-------------|-------------|-------------|
| O | 0.40651200  | -1.88631600 | -0.72302100 |
| N | 1.80048700  | -0.14680300 | -0.24110300 |
| N | -0.38711100 | 0.24282900  | -1.02641300 |
| N | -2.86338700 | 0.34347700  | 0.39851900  |
| C | 2.88276700  | 2.01314600  | 0.34887400  |
| H | 2.09799000  | 2.28089900  | 1.06687200  |
| H | 3.28629500  | 2.93710000  | -0.07940600 |
| H | 3.69030800  | 1.52907000  | 0.91099200  |
| C | 2.35308800  | 1.10752100  | -0.74896800 |
| H | 3.16978500  | 0.86576200  | -1.44906600 |
| H | 1.58682300  | 1.61408200  | -1.34243500 |
| C | 0.59564500  | -0.67110600 | -0.65755000 |
| C | -0.70702300 | 1.39605100  | -0.17523600 |
| H | -1.03109300 | 2.21219200  | -0.85278100 |
| H | 0.18471300  | 1.75325000  | 0.34326000  |
| C | -1.75528100 | 1.05955800  | 0.82981300  |
| H | -1.93251300 | 1.74767100  | 1.65497000  |
| C | -2.58664700 | -0.75505100 | -0.52275100 |
| H | -3.53293600 | -1.06984300 | -0.98155300 |
| H | -2.16957400 | -1.61620100 | 0.03050200  |
| C | -1.60499500 | -0.32237600 | -1.59572900 |
| H | -1.34559700 | -1.17235000 | -2.23070400 |
| H | -2.06177600 | 0.45627700  | -2.22383100 |
| C | 2.76524500  | -1.10429300 | 0.30358100  |
| H | 3.76194700  | -0.66111600 | 0.19070500  |
| H | 2.74589800  | -2.01962300 | -0.30009600 |
| C | 2.49139600  | -1.42231500 | 1.76162500  |
| H | 2.53933900  | -0.51348700 | 2.37412800  |
| H | 3.22277000  | -2.14014600 | 2.14990800  |
| H | 1.49302700  | -1.85886000 | 1.87701900  |
| C | -3.84648700 | 0.01263900  | 1.40821600  |
| H | -4.07582000 | 0.89972700  | 2.00749600  |
| H | -4.76919900 | -0.32873100 | 0.92656200  |
| H | -3.48865900 | -0.78430300 | 2.08335000  |

### Diethylcarbamazine<sub>I</sub><sub>3</sub>

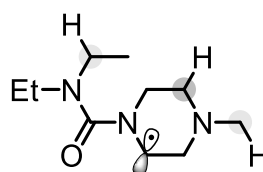

$$E = -632.293428$$

$$H_{\text{Corr.}} = 0.316191$$

|   |             |             |             |
|---|-------------|-------------|-------------|
| O | 1.11996000  | -2.10614000 | -0.29199900 |
| N | 1.91923200  | 0.03906300  | -0.22496000 |
| N | -0.40771700 | -0.41336900 | -0.21681600 |
| N | -3.14114000 | 0.33657600  | -0.11312600 |
| C | 2.37171000  | 2.48162200  | -0.26061600 |
| H | 1.73253800  | 2.68707700  | 0.60634600  |
| H | 2.36820200  | 3.36742500  | -0.90496600 |
| H | 3.39523100  | 2.34414700  | 0.10825900  |
| C | 1.88651900  | 1.26708600  | -1.02875800 |
| H | 2.51482300  | 1.11007900  | -1.92015900 |
| H | 0.86651400  | 1.42994600  | -1.38957400 |
| C | 0.90332300  | -0.89494200 | -0.26488600 |
| C | -0.76744700 | 0.84648600  | 0.24801800  |
| H | 0.01151400  | 1.38281900  | 0.78126100  |
| C | -2.77269900 | -1.06835200 | -0.07594900 |
| H | -3.54228400 | -1.65713900 | -0.59032700 |
| H | -2.71802200 | -1.43461500 | 0.97307800  |
| C | -1.45076800 | -1.27985300 | -0.77368000 |
| H | -1.11374800 | -2.31347200 | -0.67226000 |
| H | -1.56802500 | -1.05194100 | -1.84369700 |
| C | 3.25843500  | -0.51013200 | 0.01788600  |
| H | 3.98110900  | 0.22421100  | -0.35527700 |
| H | 3.39071900  | -1.42580700 | -0.57219900 |
| C | 3.50358900  | -0.77898300 | 1.48955700  |
| H | 3.40158200  | 0.14464600  | 2.07279300  |
| H | 4.51110100  | -1.17913600 | 1.64897900  |
| H | 2.78524400  | -1.51027000 | 1.87575500  |
| C | -4.48203700 | 0.54638800  | 0.39366200  |
| H | -4.73512800 | 1.61177300  | 0.35035300  |
| H | -5.20368900 | -0.00322800 | -0.22063700 |
| H | -4.59126500 | 0.20876800  | 1.44465500  |
| C | -2.17502700 | 1.08895300  | 0.66840100  |
| H | -2.29135300 | 0.82646700  | 1.75282200  |
| H | -2.40095600 | 2.16185100  | 0.59329200  |

### Diethylcarbamazine<sub>I</sub><sub>4</sub>

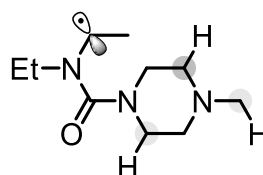

$$E = -632.299170$$

$$H_{\text{Corr.}} = 0.315758$$

|   |             |             |             |
|---|-------------|-------------|-------------|
| O | 0.47556600  | -2.04882500 | -0.50486800 |
| N | 1.85513400  | -0.23406400 | -0.29600300 |
| N | -0.35988100 | 0.02140400  | -1.04678400 |
| N | -2.87696300 | 0.49951200  | 0.24354400  |
| C | 3.16636100  | 1.90110900  | -0.19468500 |
| H | 2.65019100  | 2.36988800  | 0.66456300  |
| H | 3.47018000  | 2.70512900  | -0.87101400 |
| H | 4.08315700  | 1.44987900  | 0.20988700  |
| C | 2.29595700  | 0.93559700  | -0.90925100 |
| H | 1.75085000  | 1.22756500  | -1.80185500 |
| C | 0.63456000  | -0.83227200 | -0.59711600 |

|   |             |             |             |
|---|-------------|-------------|-------------|
| C | -2.59648600 | -0.78040100 | -0.39609200 |
| H | -3.53475700 | -1.18799400 | -0.79498900 |
| H | -2.19822300 | -1.51071400 | 0.34005600  |
| C | -1.59162100 | -0.60559400 | -1.52011100 |
| H | -1.34658000 | -1.56964800 | -1.97087000 |
| H | -2.01733100 | 0.04931400  | -2.29343700 |
| C | 2.76192400  | -1.00682200 | 0.56239100  |
| H | 3.78194500  | -0.67211900 | 0.35141100  |
| H | 2.69342300  | -2.05583300 | 0.25802400  |
| C | 2.41797900  | -0.84801500 | 2.03091300  |
| H | 2.47065200  | 0.20418300  | 2.33756800  |
| H | 3.10786300  | -1.42337600 | 2.65799200  |
| H | 1.40155400  | -1.21014900 | 2.22779000  |
| C | -3.85014500 | 0.34362100  | 1.30533400  |
| H | -4.07461200 | 1.31770000  | 1.75505200  |
| H | -4.78059200 | -0.07133400 | 0.90142400  |
| H | -3.49068100 | -0.33319000 | 2.10722400  |
| C | -1.64642900 | 1.08533800  | 0.74878600  |
| H | -1.18892700 | 0.43590800  | 1.53169600  |
| H | -1.87839100 | 2.05064400  | 1.21860900  |
| C | -0.63819300 | 1.28988600  | -0.36743600 |
| H | -1.03822200 | 1.99516000  | -1.10984500 |
| H | 0.28250000  | 1.71693700  | 0.03795800  |

### Probenedicid derivative (38)

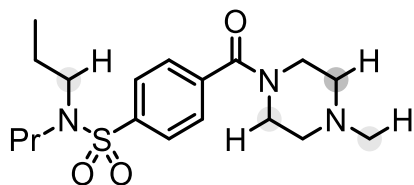

E = -1491.069206

H<sub>Corr.</sub> = 0.487648

|   |             |             |             |
|---|-------------|-------------|-------------|
| S | 2.60713300  | 0.49358900  | -1.39566000 |
| O | -2.72290000 | -2.31351800 | 1.48481600  |
| O | 3.00659800  | -0.37170400 | -2.49999600 |
| O | 2.54308300  | 1.94138300  | -1.56284400 |
| N | 3.66020500  | 0.20704200  | -0.14209600 |
| C | -2.76198300 | -1.41783000 | 0.64313000  |
| C | -1.47732900 | -0.90288900 | 0.06568500  |
| C | -1.13785800 | 0.44990300  | 0.13036900  |
| H | -1.84406300 | 1.16762100  | 0.54403000  |
| C | 0.10362700  | 0.88403400  | -0.32039600 |
| H | 0.37420400  | 1.93605900  | -0.28542400 |
| C | 0.99376200  | -0.04618300 | -0.85151100 |
| C | 0.66809900  | -1.39996500 | -0.92648200 |
| H | 1.36588400  | -2.10834300 | -1.36576000 |
| C | -0.56473300 | -1.82537200 | -0.44972300 |
| H | -0.83139900 | -2.87895600 | -0.47960500 |
| C | 3.54866900  | 1.10077700  | 1.02316200  |
| H | 3.59718500  | 0.47246200  | 1.92509900  |
| H | 2.55869100  | 1.57989000  | 1.04487400  |
| C | 4.62990700  | 2.16681500  | 1.05394100  |
| H | 4.54100300  | 2.77707800  | 0.14601300  |
| H | 5.61484500  | 1.68126600  | 1.00968100  |
| C | 4.51662900  | 3.03137700  | 2.29854900  |
| H | 5.29100700  | 3.80465000  | 2.32216700  |
| H | 4.61916000  | 2.43047900  | 3.21165500  |
| H | 3.54290900  | 3.53590400  | 2.34312700  |
| H | 5.74635600  | -3.35137800 | -0.03806600 |
| C | 4.03058700  | -1.18654400 | 0.13264600  |
| H | 3.92690300  | -1.75454100 | -0.79882900 |
| H | 3.33640100  | -1.62345100 | 0.87420600  |
| C | 5.46249700  | -1.30370400 | 0.62764000  |
| H | 5.58948900  | -0.72260200 | 1.55244100  |
| H | 6.12978100  | -0.85405600 | -0.12010500 |
| C | 5.83354500  | -2.75615700 | 0.87940100  |
| H | 6.86296300  | -2.84889000 | 1.23959100  |
| H | 5.17601800  | -3.20923200 | 1.63207300  |

|   |             |             |             |
|---|-------------|-------------|-------------|
| N | -3.92281500 | -0.83145200 | 0.24020600  |
| C | -4.11237000 | -0.07012200 | -0.99085200 |
| C | -5.18144700 | -1.22273900 | 0.86173200  |
| H | -4.60908800 | -0.71906500 | -1.72972700 |
| H | -3.14794600 | 0.23136200  | -1.40463500 |
| C | -6.04012100 | 0.00041600  | 1.09206500  |
| H | -4.95755900 | -1.73680000 | 1.80160800  |
| H | -5.70759200 | -1.93479800 | 0.20174200  |
| N | -6.25865500 | 0.72994600  | -0.14839800 |
| H | -7.01257700 | -0.30542600 | 1.49829800  |
| H | -5.55135600 | 0.65121600  | 1.85009100  |
| C | -7.12255400 | 1.87350100  | 0.06672600  |
| H | -7.30261100 | 2.39057400  | -0.88240300 |
| H | -8.08771700 | 1.54253200  | 0.46599500  |
| H | -6.68491500 | 2.60135500  | 0.77975900  |
| C | -4.98692800 | 1.13787700  | -0.72308400 |
| H | -4.45143800 | 1.83943800  | -0.04447800 |
| H | -5.17604600 | 1.66899200  | -1.66463800 |
| C | 1.21288679  | 5.66710896  | 0.00000000  |
| C | -0.21606921 | 5.63938696  | 0.51488000  |
| C | -0.21606921 | 3.19726896  | 0.51488000  |
| C | 1.21288679  | 3.16954696  | 0.00000000  |
| C | 1.96673379  | 4.41832796  | 0.43983600  |
| H | -0.21767621 | 5.71448496  | 1.62190600  |
| H | -0.78980721 | 6.49229996  | 0.13221900  |
| H | 1.19755979  | 5.72137596  | -1.09884800 |
| H | 1.71093379  | 6.57515096  | 0.36272900  |
| H | -0.21767621 | 3.12217096  | 1.62190600  |
| H | -0.78980721 | 2.34435596  | 0.13221900  |
| H | 1.71093379  | 2.26150496  | 0.36272900  |
| H | 1.19755979  | 3.11527996  | -1.09884800 |
| H | 2.05918579  | 4.41832796  | 1.53820400  |
| H | 2.98709879  | 4.41832796  | 0.03689300  |
| N | -0.89836521 | 4.41832796  | 0.10852300  |
| C | -2.27675521 | 4.41832796  | 0.18046100  |
| H | -2.78280521 | 5.35716796  | -0.02774200 |
| H | -2.78280521 | 3.47948796  | -0.02774200 |

### Probenedicid<sub>11</sub>

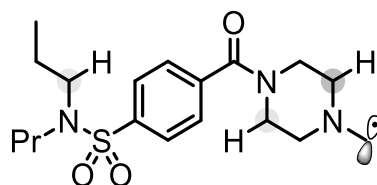

E = -1490.410538

H<sub>Corr.</sub> = 0.474103

|   |             |             |             |
|---|-------------|-------------|-------------|
| S | 2.56963000  | 0.51566800  | -1.38444200 |
| O | -2.77944000 | -2.30867700 | 1.45573400  |
| O | 2.95514100  | -0.33168000 | -2.50743700 |
| O | 2.51400500  | 1.96663500  | -1.52400400 |
| N | 3.62797300  | 0.19803200  | -0.14349300 |
| C | -2.80712500 | -1.39335000 | 0.63629600  |
| C | -1.51880400 | -0.87794700 | 0.06886400  |
| C | -1.16900700 | 0.47081500  | 0.15794200  |
| H | -1.86756000 | 1.18608900  | 0.58835400  |
| C | 0.07421100  | 0.90389600  | -0.28907700 |
| H | 0.35270300  | 1.95305300  | -0.23547000 |
| C | 0.95522100  | -0.02286700 | -0.84079200 |
| C | 0.61946700  | -1.37269600 | -0.93912700 |
| H | 1.31037000  | -2.07791300 | -1.39410000 |
| C | -0.61482300 | -1.79787900 | -0.46605100 |
| H | -0.88965000 | -2.84864500 | -0.51481400 |
| C | 3.53084600  | 1.06992600  | 1.03948500  |
| H | 3.57950200  | 0.42369900  | 1.92866800  |
| H | 2.54500100  | 1.55651800  | 1.07638400  |
| C | 4.62082700  | 2.12650900  | 1.08447700  |
| H | 4.53088300  | 2.75587200  | 0.18981800  |
| H | 5.60153600  | 1.63431400  | 1.02367300  |
| C | 4.52264900  | 2.96629000  | 2.34721100  |

|   |             |             |             |
|---|-------------|-------------|-------------|
| H | 5.30318200  | 3.73294200  | 2.38125800  |
| H | 4.62664400  | 2.34606100  | 3.24711100  |
| H | 3.55323300  | 3.47726900  | 2.40879700  |
| H | 5.69754800  | -3.37121900 | -0.13049700 |
| C | 3.99354900  | -1.20252900 | 0.10083600  |
| H | 3.87864600  | -1.75173300 | -0.84051100 |
| H | 3.30355200  | -1.65004000 | 0.83995100  |
| C | 5.42912300  | -1.33679200 | 0.58067800  |
| H | 5.56709000  | -0.77579000 | 1.51625800  |
| H | 6.09202600  | -0.87480400 | -0.16342900 |
| C | 5.79510700  | -2.79597200 | 0.79860100  |
| H | 6.82697800  | -2.90111600 | 1.14817900  |
| H | 5.14162100  | -3.26182300 | 1.54698300  |
| N | -3.96351900 | -0.78420700 | 0.24766500  |
| C | -4.14538400 | -0.00140300 | -0.97061600 |
| C | -5.22586500 | -1.18740200 | 0.85624500  |
| H | -4.66317400 | -0.62818800 | -1.71426200 |
| H | -3.17811700 | 0.28402600  | -1.38909800 |
| C | -6.06589900 | 0.04206000  | 1.14243500  |
| H | -5.00783900 | -1.73641200 | 1.77492000  |
| H | -5.76265900 | -1.86097500 | 0.16985700  |
| N | -6.24257100 | 0.84186900  | -0.06034900 |
| H | -7.05377900 | -0.26053700 | 1.50835300  |
| H | -5.58239800 | 0.64633300  | 1.93385300  |
| C | -7.24572600 | 1.79280400  | -0.03925500 |
| H | -7.30622600 | 2.46643800  | -0.88919200 |
| H | -8.14299100 | 1.55115800  | 0.52303700  |
| C | -4.98436300 | 1.22636900  | -0.67799100 |
| H | -4.42521700 | 1.91533600  | -0.01437200 |
| H | -5.19985200 | 1.76031000  | -1.61071300 |

Probeneid<sub>I</sub><sub>2</sub>

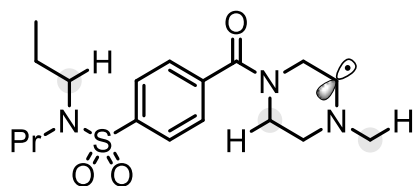

E = -1490.412828

H<sub>Corr.</sub> = 0.474404

|   |             |             |             |
|---|-------------|-------------|-------------|
| S | 2.57482500  | 0.25865800  | -1.46563600 |
| O | -2.82680100 | -2.28596200 | 1.49136500  |
| O | 3.07248400  | -0.75614400 | -2.38788100 |
| O | 2.49110600  | 1.65878200  | -1.86668000 |
| N | 3.54302300  | 0.20927000  | -0.11373200 |
| C | -2.85298100 | -1.50176900 | 0.54277800  |
| C | -1.55791200 | -1.03700600 | -0.05244800 |
| C | -1.25153300 | 0.32162100  | -0.15684300 |
| H | -1.99976400 | 1.06838900  | 0.111168900 |
| C | 0.00400600  | 0.72414000  | -0.59835900 |
| H | 0.24878000  | 1.77846300  | -0.69668100 |
| C | 0.94148400  | -0.24484200 | -0.94813800 |
| C | 0.64820700  | -1.60502600 | -0.85426500 |
| H | 1.38470700  | -2.34608100 | -1.15422900 |
| C | -0.60014500 | -1.99563400 | -0.38890600 |
| H | -0.84297300 | -3.05027500 | -0.28512900 |
| C | 3.33840300  | 1.28067100  | 0.87595900  |
| H | 3.31139400  | 0.81064800  | 1.87051800  |
| H | 2.35190900  | 1.74652400  | 0.73772700  |
| C | 4.41601700  | 2.34934000  | 0.81658600  |
| H | 4.40528700  | 2.79668400  | -0.18561600 |
| H | 5.40028600  | 1.87554600  | 0.93684900  |
| C | 4.20047300  | 3.41008100  | 1.88306300  |
| H | 4.97263700  | 4.18480400  | 1.84058300  |
| H | 4.22332600  | 2.97302400  | 2.88993100  |
| H | 3.22814300  | 3.90397000  | 1.75954000  |
| H | 5.61823700  | -3.24964900 | 0.75708000  |
| C | 3.89180200  | -1.11389400 | 0.41829800  |
| H | 3.87259100  | -1.82858200 | -0.41231300 |
| H | 3.13548400  | -1.43556700 | 1.15831000  |

|   |             |             |             |
|---|-------------|-------------|-------------|
| C | 5.27437800  | -1.12501100 | 1.04862300  |
| H | 5.31842300  | -0.39859400 | 1.87285400  |
| H | 6.00501800  | -0.79364700 | 0.29832300  |
| C | 5.62319100  | -2.51052600 | 1.56780500  |
| H | 6.61667400  | -2.52676200 | 2.02693200  |
| H | 4.90185800  | -2.84396600 | 2.32454700  |
| N | -4.01140100 | -1.01826200 | 0.02217300  |
| C | -4.17175700 | -0.17797400 | -1.16206200 |
| C | -5.26566200 | -1.19066700 | 0.73850900  |
| H | -4.82910400 | -0.73722200 | -1.85784000 |
| H | -3.21738900 | -0.04486500 | -1.67602200 |
| C | -4.76885000 | 1.13407200  | -0.78448200 |
| C | -5.75028100 | 0.16909400  | 1.20725600  |
| H | -5.10176400 | -1.86138000 | 1.58442200  |
| H | -6.00246300 | -1.64757400 | 0.06202100  |
| N | -5.84195800 | 1.10978400  | 0.09608400  |
| H | -4.77958300 | 1.93995500  | -1.51616600 |
| H | -6.74097000 | 0.08011100  | 1.66999500  |
| H | -5.05111300 | 0.55792800  | 1.97370500  |
| C | -6.40025000 | 2.39302400  | 0.46975000  |
| H | -6.53063400 | 3.01328200  | -0.42246000 |
| H | -7.37997700 | 2.24719600  | 0.93688200  |
| H | -5.74970700 | 2.93198500  | 1.17986900  |

Probeneid<sub>I</sub><sub>3</sub>

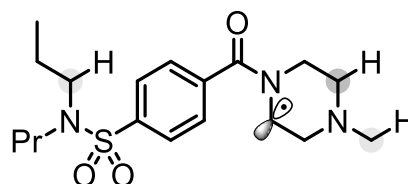

E = -1490.409741

H<sub>Corr.</sub> = 0.473694

|   |             |             |             |
|---|-------------|-------------|-------------|
| S | 2.61091300  | 0.61601100  | -1.35918700 |
| O | -2.71567500 | -2.31563000 | 1.40415100  |
| O | 2.95353100  | -0.16064800 | -2.54540600 |
| O | 2.58670200  | 2.07410400  | -1.39891500 |
| N | 3.68893000  | 0.19111300  | -0.16671900 |
| C | -2.74397600 | -1.32973600 | 0.67020400  |
| C | -1.47428500 | -0.79237900 | 0.09644900  |
| C | -1.08450500 | 0.53719400  | 0.28210300  |
| H | -1.74802100 | 1.23175300  | 0.79510100  |
| C | 0.15492700  | 0.97570100  | -0.16863800 |
| H | 0.46067300  | 2.01066300  | -0.04006500 |
| C | 0.99763300  | 0.07547400  | -0.81650400 |
| C | 0.62573800  | -1.25497300 | -1.00730700 |
| H | 1.28655900  | -1.93870600 | -1.53410400 |
| C | -0.60523000 | -1.68733800 | -0.53324100 |
| H | -0.90690500 | -2.72473900 | -0.65453000 |
| C | 3.64279400  | 0.98721200  | 1.07153200  |
| H | 3.67058600  | 0.28387800  | 1.91740900  |
| H | 2.68106400  | 1.51461600  | 1.15117500  |
| C | 4.77944800  | 1.98980000  | 1.17000700  |
| H | 4.71078200  | 2.67677000  | 0.31684600  |
| H | 5.73716100  | 1.46046700  | 1.06870200  |
| C | 4.72886200  | 2.75343800  | 2.48287800  |
| H | 5.54383000  | 3.48053000  | 2.55608000  |
| H | 4.81104300  | 2.07462800  | 3.34179600  |
| H | 3.78422000  | 3.30278700  | 2.58553300  |
| H | 5.63225700  | -3.43884000 | -0.41736100 |
| C | 4.00839000  | -1.23407400 | -0.01790100 |
| H | 3.86500000  | -1.71646300 | -0.99140500 |
| H | 3.31071100  | -1.70518500 | 0.69918900  |
| C | 5.44308100  | -1.44980400 | 0.43400600  |
| H | 5.61025600  | -0.96012500 | 1.40410300  |
| H | 6.11462400  | -0.96121100 | -0.28497000 |
| C | 5.75914000  | -2.93237800 | 0.54751800  |
| H | 6.78991000  | -3.09700900 | 0.87680300  |
| H | 5.09667000  | -3.42529800 | 1.27023000  |
| N | -3.92898200 | -0.67154500 | 0.38843000  |



|   |             |             |             |
|---|-------------|-------------|-------------|
| C | -4.09536300 | 0.20211500  | -0.78696900 |
| C | -5.08932600 | -1.10654300 | 0.99909200  |
| H | -4.34875600 | -0.42688200 | -1.65150800 |
| H | -3.15836100 | 0.71630000  | -1.00175500 |
| C | -6.30538300 | -0.25661300 | 0.96773500  |
| H | -4.96446900 | -1.88085700 | 1.74669800  |
| N | -6.44656800 | 0.49919700  | -0.26706900 |
| H | -7.19521200 | -0.88257700 | 1.11616700  |
| H | -6.27785200 | 0.44920400  | 1.83797600  |
| C | -5.20675800 | 1.19728200  | -0.54972500 |
| H | -4.92956200 | 1.88421400  | 0.28151600  |
| H | -5.33471700 | 1.80743100  | -1.45217800 |
| C | -7.56728400 | 1.41385600  | -0.18375800 |
| H | -7.68713800 | 1.94481100  | -1.13433200 |
| H | -8.48863200 | 0.85556600  | 0.01596600  |
| H | -7.43788200 | 2.16471700  | 0.62189200  |

Probenecid<sub>I4</sub>

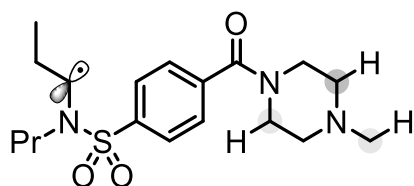

E = -1490.412331

H<sub>Corr.</sub> = 0.473264

|   |             |             |             |
|---|-------------|-------------|-------------|
| S | 2.80697500  | -1.67462700 | 0.33071900  |
| O | -2.34083100 | 2.41995700  | 1.21761100  |
| O | 3.41197800  | -1.93827400 | 1.63084800  |
| O | 2.68928700  | -2.73125800 | -0.66527400 |
| N | 3.70338200  | -0.42469300 | -0.40766400 |
| C | -2.44582900 | 1.22540400  | 0.94512200  |
| C | -1.20381400 | 0.39447700  | 0.81837900  |
| C | -0.92627300 | -0.32781300 | -0.34485100 |
| H | -1.65275700 | -0.35150000 | -1.15526400 |
| C | 0.28068100  | -1.00371500 | -0.47978800 |
| H | 0.50928800  | -1.56871100 | -1.38018200 |
| C | 1.19743000  | -0.95765900 | 0.56897600  |
| C | 0.93982400  | -0.23902600 | 1.73500000  |
| H | 1.67237400  | -0.21993300 | 2.53830400  |
| C | -0.26341700 | 0.44479800  | 1.84992900  |
| H | -0.48174500 | 1.02717300  | 2.74161500  |
| C | 3.28215000  | -0.07187800 | -1.69234800 |
| H | 3.16805700  | -0.89629400 | -2.39329300 |
| C | 2.79156400  | 1.29401700  | -2.02912500 |
| H | 3.59751300  | 2.04575800  | -1.96291100 |
| H | 2.04171700  | 1.61249800  | -1.28083500 |
| C | 2.17421400  | 1.32792900  | -3.41912900 |
| H | 1.82080000  | 2.33163000  | -3.67423000 |
| H | 1.31958100  | 0.64234000  | -3.48205100 |
| H | 2.90200800  | 1.02290000  | -4.18033800 |
| H | 6.19656800  | 1.90793100  | 1.93921500  |
| C | 4.24257000  | 0.62389000  | 0.47031200  |
| H | 4.27346700  | 0.22702500  | 1.49056000  |
| H | 3.57476200  | 1.50139200  | 0.47903400  |
| C | 5.64404900  | 1.02099400  | 0.03474900  |
| H | 5.63455500  | 1.29892000  | -1.02864700 |
| H | 6.29706300  | 0.14242200  | 0.11883600  |
| C | 6.17205300  | 2.17182000  | 0.87442900  |
| H | 7.18826200  | 2.44997600  | 0.57775100  |
| H | 5.53875600  | 3.06197900  | 0.76824600  |
| N | -3.64284200 | 0.62475100  | 0.70017500  |
| C | -3.90738600 | -0.80962300 | 0.76230700  |
| H | -4.40609000 | -1.03130300 | 1.71934000  |
| H | -2.97132100 | -1.37117400 | 0.73469400  |
| C | -5.75679100 | 0.97465900  | -0.44355900 |
| N | -6.04990700 | -0.44794300 | -0.34926800 |
| H | -6.70070800 | 1.53321000  | -0.40848600 |
| H | -5.26452600 | 1.21136600  | -1.41244700 |

|   |             |             |             |
|---|-------------|-------------|-------------|
| C | -4.81739300 | -1.21874500 | -0.37796700 |
| H | -4.28465500 | -1.07958100 | -1.34556800 |
| H | -5.06220600 | -2.28461100 | -0.28630200 |
| C | -6.94791000 | -0.86492500 | -1.40762700 |
| H | -7.18245700 | -1.92999600 | -1.30155900 |
| H | -7.88441800 | -0.29941500 | -1.34748100 |
| H | -6.51187600 | -0.70523800 | -2.41463800 |
| C | -4.86135500 | 1.42635200  | 0.69313500  |
| H | -4.58330400 | 2.47699000  | 0.58474200  |
| H | -5.38441500 | 1.30433900  | 1.65454100  |

Clomipramine

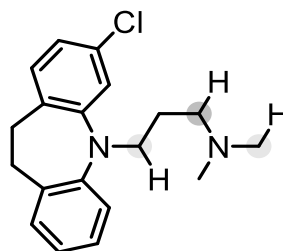

E = -847.555701

H<sub>Corr.</sub> = 0.41038

|   |             |             |             |
|---|-------------|-------------|-------------|
| C | 0.30578900  | 3.15410200  | -1.45399400 |
| C | 0.34096500  | 1.78125800  | -1.25421300 |
| C | -0.50978300 | 1.13778800  | -0.33742600 |
| C | -1.41645700 | 1.92658700  | 0.40578500  |
| C | -1.43963800 | 3.30583700  | 0.16906700  |
| C | -0.60037400 | 3.93255100  | -0.74159600 |
| H | 0.98337300  | 3.60808500  | -2.17360600 |
| H | 1.04738800  | 1.19240700  | -1.83337100 |
| H | -2.14338400 | 3.90593200  | 0.74694900  |
| H | -0.64691500 | 5.00923200  | -0.88408400 |
| C | -2.37748200 | 1.43484400  | 1.46735000  |
| H | -3.40697300 | 1.57463700  | 1.10046200  |
| H | -2.28138300 | 2.10278000  | 2.33509900  |
| C | -2.23381200 | -0.00988400 | 1.93042500  |
| H | -2.92832500 | -0.18767800 | 2.76081500  |
| H | -1.21581900 | -0.17808300 | 2.31046400  |
| N | -0.41620700 | -0.27071200 | -0.18647900 |
| C | -1.60595100 | -1.04745600 | -0.24361300 |
| C | -1.85202400 | -1.91768400 | -1.30884500 |
| C | -2.52129400 | -0.96023600 | 0.81378500  |
| C | -3.00636100 | -2.69572800 | -1.32975600 |
| H | -1.13985900 | -1.97791000 | -2.12977100 |
| C | -3.68199200 | -1.73195200 | 0.76924800  |
| C | -3.92849400 | -2.60096000 | -0.29076800 |
| H | -3.18816100 | -3.36796900 | -2.16518500 |
| H | -4.39294600 | -1.66033700 | 1.59201500  |
| H | -4.83354700 | -3.20354100 | -0.30352500 |
| C | 0.81945100  | -0.94299100 | -0.57071600 |
| H | 0.64699600  | -2.01789000 | -0.43890400 |
| H | 1.06413700  | -0.80850500 | -1.64148800 |
| C | 1.99995500  | -0.52990700 | 0.29713900  |
| H | 1.84452300  | -0.90062400 | 1.32045300  |
| H | 2.04933200  | 0.56516800  | 0.35895300  |
| C | 3.29609000  | -1.08925200 | -0.26222000 |
| H | 3.15662600  | -2.15553400 | -0.49961600 |
| H | 3.52634900  | -0.58099800 | -1.22902900 |
| N | 4.42539700  | -0.98905500 | 0.64836200  |
| C | 5.57758900  | -1.67238900 | 0.09245500  |
| H | 5.91672100  | -1.21656500 | -0.86137700 |
| H | 6.41281600  | -1.63732000 | 0.80086000  |
| H | 5.33570300  | -2.72391100 | -0.09992500 |
| C | 4.76027100  | 0.39096400  | 0.94771500  |
| H | 5.64095400  | 0.42223600  | 1.59846100  |
| H | 4.98936100  | 0.97236400  | 0.02949100  |
| H | 3.94002000  | 0.88943100  | 1.47375500  |

Clomipramine<sub>I1</sub>

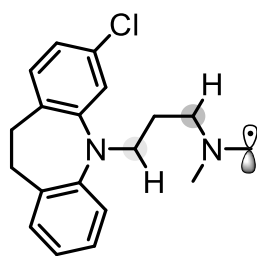

E = -846.899095

H<sub>Corr.</sub> = 0.396916

|   |             |             |             |
|---|-------------|-------------|-------------|
| C | 2.93761500  | -2.91313100 | -0.96105100 |
| C | 1.76580500  | -2.16815600 | -0.94514300 |
| C | 1.63080200  | -1.01406700 | -0.15514900 |
| C | 2.72590100  | -0.59919700 | 0.63448300  |
| C | 3.89787300  | -1.36134400 | 0.58391700  |
| C | 4.02255600  | -2.50685300 | -0.19167200 |
| H | 3.00127000  | -3.80094900 | -1.58610700 |
| H | 0.93840200  | -2.47975900 | -1.57692000 |
| H | 4.73828800  | -1.04009600 | 1.20025700  |
| H | 4.95046000  | -3.07321200 | -0.19097000 |
| C | 2.76223600  | 0.59860200  | 1.56050600  |
| H | 3.48656200  | 1.32549800  | 1.15922100  |
| H | 3.18266500  | 0.26462500  | 2.51972200  |
| C | 1.45264900  | 1.33618900  | 1.82088700  |
| H | 1.63237100  | 2.12215200  | 2.56493900  |
| H | 0.71342600  | 0.64256700  | 2.24708500  |
| N | 0.39607000  | -0.31774300 | -0.16551400 |
| C | 0.41183100  | 1.08195000  | -0.42417000 |
| C | -0.08281300 | 1.60726100  | -1.61986300 |
| C | 0.91263600  | 1.93893200  | 0.56403400  |
| C | -0.07627800 | 2.98155200  | -1.83945100 |
| H | -0.47388500 | 0.93646300  | -2.38281800 |
| C | 0.93082400  | 3.31268400  | 0.32208800  |
| C | 0.43554500  | 3.83891900  | -0.86830800 |
| H | -0.46442400 | 3.38054900  | -2.77377200 |
| H | 1.32581200  | 3.97761700  | 1.08974600  |
| H | 0.44562700  | 4.91324800  | -1.03589000 |
| C | -2.05865100 | -0.43120600 | 0.09298200  |
| H | -2.28491100 | 0.54460300  | -0.35873900 |
| H | -1.85943000 | -0.25423000 | 1.16003600  |
| N | -4.52429700 | -0.73816700 | 0.23244100  |
| C | -5.64920600 | -1.31821700 | -0.32655800 |
| H | -6.61276800 | -0.92790900 | -0.01165600 |
| H | -5.54359500 | -1.73729000 | -1.32345100 |
| C | -4.64918800 | -0.28070500 | 1.60201000  |
| H | -5.63338700 | 0.17520700  | 1.74353100  |
| H | -4.54425900 | -1.11398800 | 2.31975300  |
| H | -3.89078400 | 0.47446300  | 1.83033600  |
| C | -0.81192000 | -1.04528200 | -0.52664300 |
| H | -0.69901900 | -2.06729900 | -0.14046100 |
| H | -0.94833000 | -1.14198300 | -1.62146300 |
| C | -3.24989300 | -1.35519200 | -0.09777300 |
| H | -3.10964700 | -2.27908600 | 0.49927400  |
| H | -3.30279000 | -1.66625900 | -1.15089500 |

Clomipramine I<sub>2</sub>

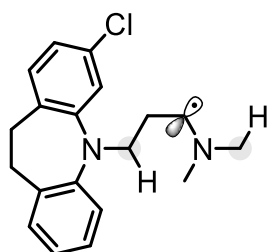

E = -846.901736

H<sub>Corr.</sub> = 0.396947

|   |             |             |             |
|---|-------------|-------------|-------------|
| C | 2.83391500  | -3.00592700 | -0.94795500 |
| C | 1.69399200  | -2.21313300 | -0.94102300 |
| C | 1.59969600  | -1.05531900 | -0.15014300 |
| C | 2.70433200  | -0.68762700 | 0.64971000  |
| C | 3.84409300  | -1.49759700 | 0.60812400  |
| C | 3.92811200  | -2.64626500 | -0.16829500 |
| H | 2.86610600  | -3.89479900 | -1.57401500 |
| H | 0.85935100  | -2.48886000 | -1.57993500 |
| H | 4.69156000  | -1.21243500 | 1.23256100  |
| H | 4.83170300  | -3.25068800 | -0.16054900 |
| C | 2.78236600  | 0.50528400  | 1.57955900  |
| H | 3.54090200  | 1.20183300  | 1.18765200  |
| H | 3.17871500  | 0.15117800  | 2.54187200  |
| C | 1.50263300  | 1.29685600  | 1.82915800  |
| H | 1.70796400  | 2.07324600  | 2.57667800  |
| H | 0.73084200  | 0.63400700  | 2.24638100  |
| N | 0.39608700  | -0.30793300 | -0.17176800 |
| C | 0.47460400  | 1.08992800  | -0.42648900 |
| C | 0.01516900  | 1.63764800  | -1.62648100 |
| C | 1.00121100  | 1.92374700  | 0.56809300  |
| C | 0.08337800  | 3.01043100  | -1.84413300 |
| H | -0.39696000 | 0.98471500  | -2.39377000 |
| C | 1.08021300  | 3.29594500  | 0.32869800  |
| C | 0.62075200  | 3.84427000  | -0.86606300 |
| H | -0.27716500 | 3.42672600  | -2.78199400 |
| H | 1.49504600  | 3.94248700  | 1.10164800  |
| H | 0.67872000  | 4.91742100  | -1.03181000 |
| C | -2.06146300 | -0.32827900 | 0.08942300  |
| H | -2.18530000 | 0.69884800  | -0.30456100 |
| H | -1.86228100 | -0.20779800 | 1.16872900  |
| C | -3.27746600 | -1.14755000 | -0.16842900 |
| H | -3.27229900 | -1.83496100 | -1.01644000 |
| N | -4.53902200 | -0.66321500 | 0.16216000  |
| C | -5.63708900 | -1.58323700 | -0.05436900 |
| H | -5.66683800 | -2.37831300 | 0.71237500  |
| H | -6.58814100 | -1.04031900 | -0.02841300 |
| H | -5.53657800 | -2.05557000 | -1.03697300 |
| C | -4.66719200 | 0.09379500  | 1.39192600  |
| H | -5.66513400 | 0.54181100  | 1.43923300  |
| H | -4.52899900 | -0.54493100 | 2.28429000  |
| H | -3.93171800 | 0.90238600  | 1.42824800  |
| C | -0.84003000 | -0.98267600 | -0.54125100 |
| H | -0.77425800 | -2.01233400 | -0.16750200 |
| H | -0.98205700 | -1.05736900 | -1.63682200 |

Clomipramine I<sub>3</sub>

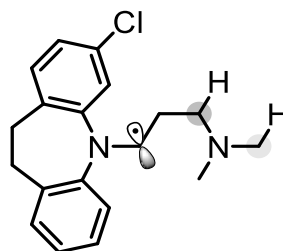

E = -846.903205

H<sub>Corr.</sub> = 0.39659

|   |             |             |             |
|---|-------------|-------------|-------------|
| C | -1.07313900 | -2.59340400 | -1.46771600 |
| C | -0.77795500 | -1.27988300 | -1.14024400 |
| C | 0.27618400  | -0.95737800 | -0.26897700 |
| C | 1.06885700  | -1.98943200 | 0.27086600  |
| C | 0.75523100  | -3.30540500 | -0.09096200 |
| C | -0.29837200 | -3.62350100 | -0.93733000 |
| H | -1.89613000 | -2.80928200 | -2.14538400 |
| H | -1.35567700 | -0.46279000 | -1.56954300 |
| H | 1.36450800  | -4.10647600 | 0.32858700  |
| H | -0.51164000 | -4.66145400 | -1.18034000 |

|   |             |             |             |
|---|-------------|-------------|-------------|
| C | 2.23941100  | -1.81984700 | 1.21413800  |
| H | 3.15331300  | -2.14005600 | 0.68868700  |
| H | 2.11016600  | -2.53351000 | 2.03999300  |
| C | 2.48838700  | -0.43004300 | 1.79169200  |
| H | 3.31922400  | -0.48923400 | 2.50545200  |
| H | 1.60307500  | -0.09593800 | 2.35130100  |
| N | 0.48960000  | 0.41726500  | 0.02955100  |
| C | 1.79802800  | 0.95190400  | -0.16206900 |
| C | 2.05297700  | 1.86407000  | -1.18554900 |
| C | 2.81235500  | 0.56065100  | 0.71817200  |
| C | 3.33178200  | 2.39047400  | -1.34227400 |
| H | 1.24653400  | 2.14774600  | -1.85911700 |
| C | 4.09205500  | 1.08539300  | 0.53661700  |
| C | 4.35491200  | 1.99801200  | -0.48210000 |
| H | 3.53005400  | 3.09904400  | -2.14292300 |
| H | 4.88758100  | 0.78319200  | 1.21699100  |
| H | 5.35631300  | 2.40420100  | -0.60287300 |
| C | -0.57953700 | 1.30990600  | 0.10734100  |
| H | -0.28709500 | 2.35720300  | 0.06821200  |
| C | -1.85739300 | 0.93542000  | 0.77828000  |
| H | -1.91456500 | 1.37933100  | 1.78791800  |
| H | -1.89359200 | -0.15121100 | 0.92227900  |
| C | -3.07329400 | 1.40954400  | -0.00976200 |
| H | -3.02274900 | 2.50406800  | -0.10650800 |
| H | -3.02492400 | 1.00471700  | -1.04718400 |
| N | -4.34326800 | 1.07098400  | 0.61443100  |
| C | -5.42802100 | 1.78933300  | -0.02751100 |
| H | -5.52669100 | 1.52770400  | -1.10194900 |
| H | -6.37796100 | 1.55436400  | 0.46593100  |
| H | -5.26174000 | 2.86992000  | 0.04656300  |
| C | -4.59913200 | -0.35727500 | 0.56066600  |
| H | -5.56809600 | -0.57764100 | 1.02198900  |
| H | -4.61919800 | -0.73476100 | -0.48418800 |
| H | -3.83504500 | -0.91810900 | 1.10856900  |

### Chlorpheniramine

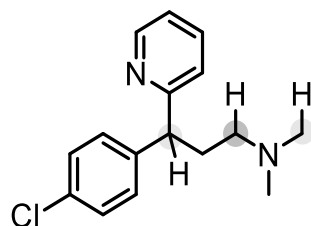

$E = -1190.486931$

$H_{\text{Corr.}} = 0.335658$

|    |             |             |             |
|----|-------------|-------------|-------------|
| Cl | 4.91669700  | 0.85026500  | 0.42593900  |
| N  | -2.25224400 | 1.39449100  | 0.94221500  |
| N  | -1.50404100 | -3.69662900 | -0.08002600 |
| C  | -1.76395300 | 1.29426400  | -0.29883100 |
| C  | -1.91381300 | 2.31489500  | -1.24269900 |
| C  | -2.59440800 | 3.47100600  | -0.88727400 |
| C  | -3.10632800 | 3.57671000  | 0.40270400  |
| C  | -2.90580900 | 2.51211400  | 1.27368100  |
| C  | -0.98628000 | 0.04650800  | -0.66348800 |
| C  | -1.52967500 | -1.21036600 | 0.01912700  |
| C  | -0.82023900 | -2.46706600 | -0.45580300 |
| C  | -0.84727100 | -4.83620200 | -0.69155000 |
| C  | -1.55525100 | -3.86763000 | 1.36061100  |
| C  | 0.49079400  | 0.25840600  | -0.39084700 |
| C  | 1.42084700  | 0.20544500  | -1.42937900 |
| C  | 2.78173300  | 0.38524400  | -1.19151200 |
| C  | 3.20752300  | 0.62289700  | 0.10817700  |
| C  | 2.30453200  | 0.68619600  | 1.16471000  |
| C  | 0.95092400  | 0.50456100  | 0.90675100  |
| H  | -1.49502000 | 2.19361300  | -2.24037700 |
| H  | -2.72599800 | 4.27702200  | -1.60521600 |
| H  | -3.64820000 | 4.46006700  | 0.72834700  |
| H  | -3.29124500 | 2.55734800  | 2.29239800  |
| H  | -1.09320800 | -0.08871500 | -1.75171800 |
| H  | -2.60370600 | -1.29985800 | -0.19954800 |

|   |             |             |             |
|---|-------------|-------------|-------------|
| H | -1.44163300 | -1.09120900 | 1.10640300  |
| H | -0.75317600 | -2.45000500 | -1.55555800 |
| H | 0.22834700  | -2.47552300 | -0.07938200 |
| H | -1.38757200 | -5.75736800 | -0.44585800 |
| H | 0.20206300  | -4.95107000 | -0.34780900 |
| H | -0.83758400 | -4.72526600 | -1.78197900 |
| H | -2.03222300 | -4.82440100 | 1.60002600  |
| H | -0.54240000 | -3.86365200 | 1.81632000  |
| H | -2.14593700 | -3.07458200 | 1.82985400  |
| H | 1.07888400  | 0.01368400  | -2.44614300 |
| H | 3.50186200  | 0.33951500  | -2.00408800 |
| H | 2.65930600  | 0.87702400  | 2.17407900  |
| H | 0.23763200  | 0.56194900  | 1.72768300  |

### Chlorpheniramine<sub>I</sub>

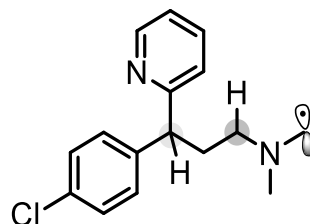

$E = -1189.829371$

$H_{\text{Corr.}} = 0.322277$

|    |             |             |             |
|----|-------------|-------------|-------------|
| Cl | 4.98877700  | 0.34063300  | 0.43063400  |
| N  | -2.10821900 | 1.59379300  | 0.93030900  |
| N  | -1.83386300 | -3.55643800 | 0.02011700  |
| C  | -1.61289900 | 1.43148900  | -0.30096900 |
| C  | -1.63621800 | 2.45352200  | -1.25470800 |
| C  | -2.19422500 | 3.67900800  | -0.91912500 |
| C  | -2.71291700 | 3.85043600  | 0.36106400  |
| C  | -2.64313800 | 2.77811400  | 1.24283600  |
| C  | -0.96606000 | 0.10483300  | -0.64318700 |
| C  | -1.63350600 | -1.07615700 | 0.06414000  |
| C  | -1.04179100 | -2.40233600 | -0.38014500 |
| C  | -1.45085200 | -4.77836300 | -0.65719600 |
| C  | -2.17493600 | -3.68578300 | 1.35418100  |
| C  | 0.52540900  | 0.17229300  | -0.37450600 |
| C  | 1.44338900  | 0.01728300  | -1.41352900 |
| C  | 2.81577600  | 0.06680000  | -1.17907400 |
| C  | 3.26527000  | 0.27642700  | 0.11746500  |
| C  | 2.37497000  | 0.43891300  | 1.17422500  |
| C  | 1.00966100  | 0.38716600  | 0.91984200  |
| H  | -1.21619000 | 2.27907600  | -2.24398600 |
| H  | -2.22651900 | 4.48815400  | -1.64482100 |
| H  | -3.16168900 | 4.78983600  | 0.67100100  |
| H  | -3.03867700 | 2.87310500  | 2.25414700  |
| H  | -1.08848800 | -0.03881400 | -1.72875400 |
| H  | -2.70991200 | -1.06443700 | -0.15941600 |
| H  | -1.53744600 | -0.94443300 | 1.14875900  |
| H  | -0.97624300 | -2.42164300 | -1.47912600 |
| H  | -0.00524700 | -2.50497500 | 0.00031600  |
| H  | -2.15333100 | -5.57768800 | -0.40081400 |
| H  | -0.43484100 | -5.10439900 | -0.37237900 |
| H  | -1.47695500 | -4.62833400 | -1.74202800 |
| H  | -2.65953500 | -4.61487400 | 1.64094000  |
| H  | -2.40188700 | -2.78336600 | 1.91191200  |
| H  | 1.08216400  | -0.15113400 | -2.42781100 |
| H  | 3.52641700  | -0.05740900 | -1.99176700 |
| H  | 2.74875800  | 0.60479500  | 2.18107600  |
| H  | 0.30738300  | 0.52242200  | 1.74110100  |

### Chlorpheniramine<sub>I</sub>

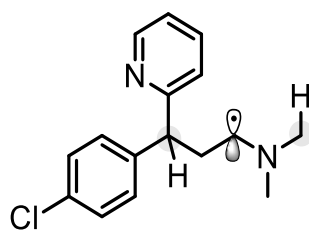

E = -1189.832756

H<sub>Corr.</sub> = 0.322231

|    |             |             |             |
|----|-------------|-------------|-------------|
| Cl | 4.70144800  | 1.53217100  | 0.46742200  |
| N  | -2.47415700 | 1.00438300  | 0.92223600  |
| N  | -0.74091000 | -3.86772600 | -0.13152900 |
| C  | -1.94657500 | 1.00524200  | -0.30668600 |
| C  | -2.19770500 | 2.03009400  | -1.22404400 |
| C  | -3.02320100 | 3.08268400  | -0.85433800 |
| C  | -3.57579100 | 3.08309600  | 0.42319500  |
| C  | -3.26803900 | 2.02235400  | 1.26754200  |
| C  | -1.00979400 | -0.12315300 | -0.68425600 |
| C  | -1.38503000 | -1.45218400 | -0.02780300 |
| C  | -0.52919000 | -2.55550400 | -0.53829800 |
| C  | 0.23257100  | -4.83273900 | -0.60186200 |
| C  | 0.42369800  | 0.27664300  | -0.39262000 |
| C  | 1.33844200  | 0.45217300  | -1.43131700 |
| C  | 2.65395800  | 0.83537400  | -1.18039300 |
| C  | 3.04911300  | 1.04763900  | 0.13316300  |
| C  | 2.15936900  | 0.88779400  | 1.19072300  |
| C  | 0.85114600  | 0.50540300  | 0.91925500  |
| H  | -1.74312800 | 1.99275600  | -2.21275200 |
| H  | -3.23478900 | 3.88970600  | -1.55177900 |
| H  | -4.22941600 | 3.88295300  | 0.75936800  |
| H  | -3.68184200 | 1.98659600  | 2.27549600  |
| H  | -1.08916500 | -0.25370100 | -1.77534700 |
| H  | -2.46142800 | -1.64142000 | -0.21585400 |
| H  | -1.30401800 | -1.34125900 | 1.06443400  |
| H  | -0.08782300 | -2.46210600 | -1.53267800 |
| H  | -0.16065900 | -5.84791400 | -0.48014300 |
| H  | 1.18695600  | -4.75778900 | -0.05062600 |
| H  | 0.43517100  | -4.66627200 | -1.66485500 |
| H  | 1.02091000  | 0.28070100  | -2.45961900 |
| H  | 3.36302200  | 0.96581400  | -1.99352900 |
| H  | 2.48873400  | 1.06368100  | 2.21135900  |
| H  | 0.14726900  | 0.39010000  | 1.74216200  |
| C  | -1.15192600 | -4.09619500 | 1.23981100  |
| H  | -0.34456900 | -3.85774400 | 1.95697800  |
| H  | -2.02732700 | -3.49031900 | 1.48981500  |
| H  | -1.42332300 | -5.14960900 | 1.36403300  |

### Chlorpheniramine I<sub>3</sub>

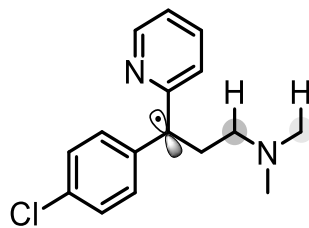

E = -1189.848604

H<sub>Corr.</sub> = 0.322582

|    |             |             |             |
|----|-------------|-------------|-------------|
| Cl | 5.20392800  | 0.39919700  | -0.31077400 |
| N  | -2.90167100 | 1.11695200  | -0.15088100 |
| N  | -1.92368000 | -3.35645000 | -0.05488100 |
| C  | -1.62274900 | 1.38318800  | 0.21333600  |
| C  | -1.19641200 | 2.71131700  | 0.43159500  |
| C  | -2.08502300 | 3.75606300  | 0.23662700  |
| C  | -3.38484100 | 3.47358800  | -0.17516300 |

|   |             |             |             |
|---|-------------|-------------|-------------|
| C | -3.73428100 | 2.13351400  | -0.34327700 |
| C | -0.75843500 | 0.23883900  | 0.43289600  |
| C | -1.40089000 | -1.06892800 | 0.78537300  |
| C | -2.20294200 | -4.11041300 | -1.26325100 |
| C | 0.67657100  | 0.30341800  | 0.27123400  |
| C | 1.29949100  | 1.25985100  | -0.56710100 |
| C | 2.67237300  | 1.29263200  | -0.74880200 |
| C | 3.47011900  | 0.35911700  | -0.09208300 |
| C | 2.90204600  | -0.61560800 | 0.72345300  |
| C | 1.52690000  | -0.64452000 | 0.89014500  |
| H | -0.19058800 | 2.90947200  | 0.79145100  |
| H | -1.76992100 | 4.78107400  | 0.41716700  |
| H | -4.11438800 | 4.26029100  | -0.34396900 |
| H | -4.74847700 | 1.87025500  | -0.64630900 |
| H | -2.44121000 | -0.90607300 | 1.08217500  |
| H | -0.88894300 | -1.51098200 | 1.65115700  |
| H | -2.63711700 | -5.08310600 | -1.00562400 |
| H | -1.28825600 | -4.29217300 | -1.86527600 |
| H | -2.92150200 | -3.56886900 | -1.88820100 |
| H | 0.68768700  | 1.96558800  | -1.12282100 |
| H | 3.12507400  | 2.02750700  | -1.40920100 |
| H | 3.53480100  | -1.34418800 | 1.22325200  |
| H | 1.10581700  | -1.41304100 | 1.53355500  |
| C | -1.01961600 | -4.10755700 | 0.79631700  |
| H | -0.03061600 | -4.26413300 | 0.31530500  |
| H | -0.85774600 | -3.59626600 | 1.75131600  |
| H | -1.44998600 | -5.09022900 | 1.01857100  |
| C | -1.38440600 | -2.04741700 | -0.39000500 |
| H | -0.35171500 | -2.14154800 | -0.79481100 |
| H | -1.99968200 | -1.61595000 | -1.19199600 |

### Diltiazem

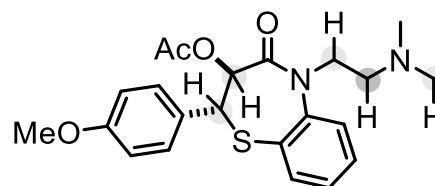

E = -1662.116187

H<sub>Corr.</sub> = 0.477624

|   |             |             |             |
|---|-------------|-------------|-------------|
| S | -0.37874800 | 2.24774700  | -1.15310200 |
| C | 0.60555600  | -0.36064500 | 0.18774500  |
| N | 1.72985700  | 0.07199300  | -0.46524700 |
| C | 1.32365100  | 2.49460100  | -0.68424000 |
| C | 2.19066800  | 1.41314500  | -0.43672700 |
| C | -2.41261400 | 0.85560400  | 0.02725600  |
| C | -4.87071500 | -0.37364800 | -0.55656000 |
| O | -6.09902900 | -0.90964700 | -0.76642400 |
| O | -0.76001700 | -0.01541100 | 2.14976700  |
| C | 0.02956800  | -0.65790100 | 3.03672200  |
| O | 1.23877800  | -0.62539200 | 2.98027400  |
| O | 0.18704900  | -1.50408400 | 0.08069300  |
| N | 3.73258200  | -3.02377400 | -1.16281100 |
| C | -6.23310600 | -1.89193200 | -1.77409000 |
| H | -7.28310800 | -2.18837600 | -1.77524700 |
| H | -5.97024900 | -1.48999300 | -2.76157000 |
| H | -5.60973100 | -2.77044600 | -1.56121600 |
| C | -1.11744900 | 1.53260000  | 0.38807900  |
| H | -1.34383500 | 2.36275300  | 1.07009400  |
| C | -0.07953900 | 0.65708700  | 1.09818300  |
| H | 0.68666600  | 1.30505200  | 1.54213900  |
| C | -0.78562000 | -1.39683200 | 4.04409700  |
| H | -0.14579900 | -1.74141900 | 4.85710400  |
| H | -1.59124300 | -0.76599300 | 4.42912600  |
| H | -1.24995500 | -2.26035400 | 3.55592400  |
| C | 2.45479000  | -0.92655100 | -1.26121900 |
| H | 3.07458000  | -0.39400700 | -1.98932300 |
| H | 1.70912500  | -1.50308400 | -1.81931000 |

|   |             |             |             |
|---|-------------|-------------|-------------|
| C | 3.30788400  | -1.85612600 | -0.40578800 |
| H | 2.74966300  | -2.14319300 | 0.50858000  |
| H | 4.20667000  | -1.32041400 | -0.07058800 |
| C | 4.90994400  | -3.63032900 | -0.56873000 |
| H | 5.22307700  | -4.49457600 | -1.16542600 |
| H | 5.73726000  | -2.91224100 | -0.54705900 |
| H | 4.72496100  | -3.97995100 | 0.46756800  |
| C | 2.66665300  | -4.00870200 | -1.25778400 |
| H | 2.39659700  | -4.41805000 | -0.26331900 |
| H | 1.76276900  | -3.57071900 | -1.69260900 |
| H | 2.98450300  | -4.83815700 | -1.89921100 |
| C | -3.57323900 | 1.19285500  | 0.73357600  |
| H | -3.51927200 | 1.94083300  | 1.52373100  |
| C | -4.78838800 | 0.59047400  | 0.45256800  |
| H | -5.69012900 | 0.85257000  | 1.00028300  |
| C | -3.72582000 | -0.72032900 | -1.27655200 |
| H | -3.76158300 | -1.46384000 | -2.06682500 |
| C | -2.51274600 | -0.10351700 | -0.97996200 |
| H | -1.63113100 | -0.38581100 | -1.55134500 |
| C | 3.54072400  | 1.66675900  | -0.18434700 |
| H | 4.20628000  | 0.83383300  | 0.02874600  |
| C | 4.03448500  | 2.96578900  | -0.19360600 |
| H | 5.08952900  | 3.13900200  | 0.00184800  |
| C | 3.17838300  | 4.03717900  | -0.43289400 |
| H | 3.55688500  | 5.05588400  | -0.43219900 |
| C | 1.82871300  | 3.79741000  | -0.66421200 |
| H | 1.14542100  | 4.62353800  | -0.84741900 |

Diltiazem<sub>I1</sub>

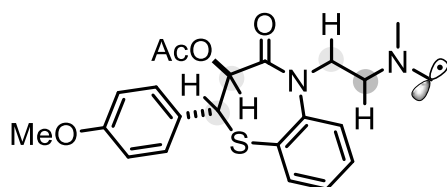

E = -1661.458101

H<sub>Corr.</sub> = 0.46394

|   |             |             |             |
|---|-------------|-------------|-------------|
| S | -0.36115200 | 2.17643700  | -1.20088400 |
| C | 0.59260200  | -0.39221100 | 0.21870800  |
| N | 1.73598500  | 0.02293400  | -0.41438800 |
| C | 1.33176000  | 2.43797700  | -0.70560100 |
| C | 2.19487500  | 1.36501800  | -0.41149600 |
| C | -2.42438900 | 0.83393700  | -0.01335700 |
| C | -4.88487300 | -0.38997500 | -0.59763400 |
| O | -6.11474600 | -0.92112900 | -0.80994200 |
| O | -0.80753600 | -0.00484200 | 2.14714300  |
| C | -0.03350600 | -0.63673700 | 3.05551800  |
| O | 1.17658300  | -0.61092000 | 3.01426200  |
| O | 0.17331400  | -1.53607400 | 0.12485400  |
| N | 3.80117800  | -3.05054400 | -0.99506600 |
| C | -6.24195800 | -1.93585200 | -1.78599900 |
| H | -7.29441200 | -2.22332800 | -1.79367400 |
| H | -5.96029300 | -1.56978500 | -2.78219200 |
| H | -5.62976600 | -2.81174200 | -1.53373200 |
| C | -1.12874000 | 1.50942500  | 0.34780300  |
| H | -1.35769100 | 2.35970300  | 1.00360300  |
| C | -0.10752600 | 0.64535300  | 1.09468900  |
| H | 0.65271100  | 1.30003100  | 1.53916600  |
| C | -0.86535300 | -1.35614900 | 4.06305100  |
| H | -0.24074600 | -1.67721000 | 4.89725300  |
| H | -1.68367100 | -0.72265300 | 4.41528300  |
| H | -1.31220000 | -2.23492700 | 3.58576800  |
| C | 2.48434700  | -0.99568600 | -1.15832400 |
| H | 3.13560100  | -0.48488700 | -1.87493200 |
| H | 1.76375800  | -1.59427400 | -1.72730700 |
| C | 3.29497500  | -1.91427700 | -0.24718600 |
| H | 2.66618300  | -2.24540600 | 0.59576600  |
| H | 4.14651100  | -1.37037700 | 0.18033300  |
| C | 5.19337200  | -3.39903500 | -0.80120800 |
| H | 5.49141600  | -4.13619500 | -1.55421900 |

|   |             |             |             |
|---|-------------|-------------|-------------|
| H | 5.82423500  | -2.51221300 | -0.92257900 |
| H | 5.37927600  | -3.83271400 | 0.19596300  |
| C | 2.91635400  | -4.08405700 | -1.23954400 |
| H | 1.85455400  | -3.86202300 | -1.19006300 |
| H | 3.27419400  | -4.91819200 | -1.83561600 |
| C | -3.59244700 | 1.20383600  | 0.66374800  |
| H | -3.54350500 | 1.97536600  | 1.43125200  |
| C | -4.80891400 | 0.60449900  | 0.38212400  |
| H | -5.71645800 | 0.89189400  | 0.90708700  |
| C | -3.73242000 | -0.76927100 | -1.28856600 |
| H | -3.76308900 | -1.53674900 | -2.05579900 |
| C | -2.51816700 | -0.15466800 | -0.99225600 |
| H | -1.63096500 | -0.46231200 | -1.54124800 |
| C | 3.53946700  | 1.62752900  | -0.13961200 |
| H | 4.20243800  | 0.80250300  | 0.10911900  |
| C | 4.03224400  | 2.92647700  | -0.17458400 |
| H | 5.08305500  | 3.10646800  | 0.03689100  |
| C | 3.18007000  | 3.98961400  | -0.45997200 |
| H | 3.55752600  | 5.00848700  | -0.47993000 |
| C | 1.83547000  | 3.74146900  | -0.71124500 |
| H | 1.15525200  | 4.56123900  | -0.93076500 |

Diltiazem<sub>I2</sub>

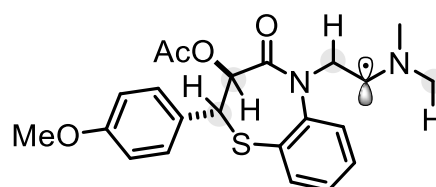

E = -1661.460231

H<sub>Corr.</sub> = 0.463992

|   |             |             |             |
|---|-------------|-------------|-------------|
| S | -0.39002000 | 2.37688100  | -0.91357500 |
| C | 0.63867300  | -0.38440300 | 0.03212300  |
| N | 1.73947100  | 0.12868400  | -0.60646300 |
| C | 1.33398000  | 2.55721300  | -0.49486600 |
| C | 2.20788600  | 1.45376900  | -0.44073200 |
| C | -2.38445200 | 0.85082400  | 0.16349800  |
| C | -4.87860100 | -0.27602700 | -0.47185200 |
| O | -6.12155700 | -0.76955200 | -0.70046300 |
| O | -0.64420000 | -0.29641900 | 2.07458700  |
| C | 0.18220000  | -1.04187300 | 2.83937600  |
| O | 1.38822400  | -0.98775400 | 2.74632000  |
| O | 0.21796300  | -1.50908700 | -0.19093700 |
| N | 3.73179300  | -2.98151800 | -1.05711100 |
| C | -6.30177100 | -1.63298100 | -1.80495600 |
| H | -7.35637700 | -1.91268500 | -1.80643300 |
| H | -6.06061200 | -1.12864600 | -2.75014400 |
| H | -5.68794200 | -2.53835500 | -1.70891200 |
| C | -1.06916300 | 1.47072100  | 0.55157800  |
| H | -1.25873900 | 2.20551500  | 1.34510100  |
| C | -0.00716200 | 0.50977500  | 1.09166500  |
| H | 0.78112300  | 1.09428700  | 1.58307500  |
| C | -0.59072000 | -1.91891000 | 3.76622100  |
| H | 0.07960200  | -2.35765400 | 4.50602300  |
| H | -1.39030000 | -1.35704400 | 4.25626700  |
| H | -1.06092400 | -2.71784200 | 3.18295500  |
| C | 2.51197700  | -0.81050400 | -1.43784700 |
| H | 3.13020200  | -0.18869500 | -2.10884000 |
| H | 1.79664300  | -1.34300600 | -2.07735600 |
| C | 3.28277900  | -1.75608000 | -0.58920300 |
| H | 3.76299800  | -1.38800700 | 0.31639800  |
| C | 4.24069600  | -3.87455700 | -0.03255900 |
| H | 4.81303800  | -4.68454000 | -0.49679300 |
| H | 4.90541600  | -3.32396800 | 0.64069600  |
| H | 3.42534200  | -4.31438500 | 0.56810900  |
| C | -3.51771400 | 1.12418800  | 0.93832100  |
| H | -3.42810800 | 1.78168600  | 1.80222000  |
| C | -4.75062300 | 0.57183000  | 0.63221300  |
| H | -5.63128300 | 0.78495200  | 1.23293200  |

|   |             |             |             |
|---|-------------|-------------|-------------|
| C | -3.76126100 | -0.55808000 | -1.26018700 |
| H | -3.83270100 | -1.21141200 | -2.12428600 |
| C | -2.53000200 | 0.00736300  | -0.93751000 |
| H | -1.67105800 | -0.22243400 | -1.56404800 |
| C | 3.57458500  | 1.67774100  | -0.25071500 |
| H | 4.25064900  | 0.82644600  | -0.20253800 |
| C | 4.07244000  | 2.96829200  | -0.12095300 |
| H | 5.13946900  | 3.11737300  | 0.02314800  |
| C | 3.20895100  | 4.05996400  | -0.15905800 |
| H | 3.59237800  | 5.07084500  | -0.04896000 |
| C | 1.84683800  | 3.84782900  | -0.33614600 |
| H | 1.15779500  | 4.68869900  | -0.37073300 |
| C | 2.94473100  | -3.66140800 | -2.06924500 |
| H | 1.94375100  | -3.94041500 | -1.69387900 |
| H | 2.82283900  | -3.03468400 | -2.95795700 |
| H | 3.46923100  | -4.57189700 | -2.37489500 |

Diltiazem I<sub>3</sub>

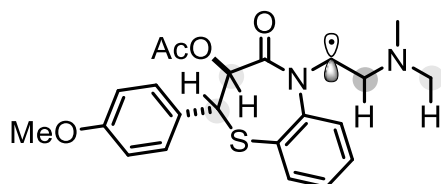

E = -1661.456198

H<sub>Corr.</sub> = 0.463404

|   |             |             |             |
|---|-------------|-------------|-------------|
| S | -0.21693100 | 2.11630300  | -1.28711400 |
| C | 0.70361700  | -0.35960300 | 0.22279200  |
| N | 1.90639800  | 0.02557200  | -0.35514800 |
| C | 1.46516200  | 2.42430800  | -0.78253500 |
| C | 2.33309300  | 1.38260800  | -0.40655800 |
| C | -2.31762800 | 0.92312100  | -0.01312700 |
| C | -4.83308900 | -0.22261800 | -0.51577400 |
| O | -6.08620800 | -0.71096000 | -0.69197700 |
| O | -0.71013900 | 0.07272000  | 2.13285000  |
| C | 0.04478400  | -0.58013300 | 3.04206300  |
| O | 1.25466500  | -0.60369200 | 2.99054500  |
| O | 0.25302200  | -1.48496700 | 0.10156400  |
| N | 3.45211900  | -3.24544800 | -1.14907600 |
| C | -6.26433700 | -1.76970700 | -1.61173000 |
| H | -7.32834100 | -2.01072000 | -1.59924900 |
| H | -5.97373300 | -1.46983800 | -2.62728900 |
| H | -5.68911000 | -2.65698600 | -1.31591200 |
| C | -0.99279100 | 1.56359300  | 0.30194000  |
| H | -1.18138100 | 2.45570100  | 0.91340400  |
| C | 0.00872000  | 0.69902900  | 1.07728200  |
| H | 0.77093900  | 1.35160200  | 1.52125900  |
| C | -0.80713700 | -1.25402300 | 4.06432200  |
| H | -0.18552000 | -1.61298200 | 4.88516000  |
| H | -1.57858900 | -0.57376800 | 4.43493300  |
| H | -1.31639800 | -2.10273700 | 3.59552000  |
| C | 2.74526100  | -0.93382800 | -0.93818100 |
| C | 3.31650400  | -0.59559300 | -1.80109500 |
| C | 4.13834600  | -4.33165700 | -0.47699800 |
| H | 4.37093800  | -5.12508100 | -1.19612300 |
| H | 5.07983600  | -3.97515900 | -0.04339900 |
| H | 3.52803600  | -4.77507400 | 0.33661300  |
| C | -3.46387100 | 1.38210800  | 0.64664500  |
| H | -3.37646600 | 2.19372100  | 1.36800200  |
| C | -4.70725700 | 0.82172000  | 0.40515100  |
| H | -5.59780700 | 1.17832000  | 0.91658300  |
| C | -3.70292300 | -0.69077200 | -1.18884000 |
| H | -3.77239000 | -1.49838600 | -1.91108900 |
| C | -2.46069600 | -0.11472900 | -0.93358800 |
| H | -1.59132300 | -0.49294100 | -1.46630600 |
| C | 3.66508200  | 1.67048000  | -0.10010400 |
| H | 4.31869700  | 0.85730500  | 0.20984900  |
| C | 4.14419400  | 2.97160100  | -0.18208800 |
| H | 5.18368100  | 3.17721600  | 0.05953600  |
| C | 3.29090200  | 4.00661500  | -0.55806500 |

|   |            |             |             |
|---|------------|-------------|-------------|
| H | 3.65841800 | 5.02740500  | -0.62083300 |
| C | 1.95831300 | 3.73044800  | -0.84318200 |
| H | 1.27895800 | 4.52999000  | -1.12979100 |
| C | 2.23283900 | -3.72775600 | -1.77631800 |
| H | 1.53555400 | -4.17468000 | -1.03963800 |
| H | 1.71142600 | -2.90026600 | -2.27068500 |
| H | 2.48000700 | -4.48605500 | -2.52785900 |
| C | 3.16964600 | -2.16209000 | -0.21794300 |
| H | 2.42111900 | -2.45259800 | 0.54549300  |
| H | 4.10610700 | -1.94719600 | 0.33147800  |

Diltiazem I<sub>4</sub>

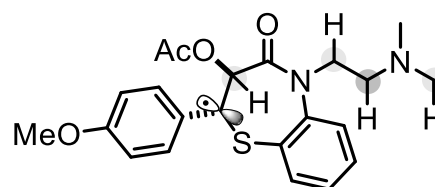

E = -1661.473032

H<sub>Corr.</sub> = 0.464654

|   |             |             |             |
|---|-------------|-------------|-------------|
| S | -0.68492400 | 2.23774000  | -0.70704200 |
| C | 0.81828300  | -0.52298000 | 0.08639800  |
| N | 1.78523700  | 0.23651400  | -0.52082700 |
| C | 0.99148700  | 2.56159400  | -0.20012000 |
| C | 2.02415200  | 1.60277400  | -0.21829900 |
| C | -2.49402500 | 0.31143900  | 0.00449800  |
| C | -5.08083100 | -0.70266400 | -0.56798900 |
| O | -6.28431000 | -1.28285900 | -0.80148400 |
| O | -0.60519700 | -0.66884700 | 2.03914600  |
| C | 0.32646900  | -1.20066200 | 2.86065300  |
| O | 1.49838500  | -0.90247800 | 2.79897300  |
| O | 0.64950400  | -1.70563700 | -0.16537600 |
| N | 4.30529100  | -2.28984100 | -1.68617900 |
| C | -7.30372800 | -0.48944800 | -1.37461600 |
| H | -8.17436600 | -1.13818300 | -1.48156000 |
| H | -7.56228900 | 0.35818600  | -0.72600700 |
| H | -7.00902600 | -0.11395800 | -2.36364200 |
| C | -1.19167400 | 0.84641800  | 0.25958000  |
| C | -0.09704000 | 0.22271400  | 1.06025500  |
| H | 0.47763300  | 1.00191500  | 1.58038700  |
| C | -0.28865700 | -2.18067100 | 3.80163900  |
| H | 0.44124400  | -2.48027700 | 4.55417600  |
| H | -1.17640700 | -1.75401200 | 4.27647600  |
| H | -0.61106600 | -3.06101300 | 3.23496600  |
| C | 5.60520800  | -2.73960600 | -1.22262000 |
| H | 6.03307800  | -3.44369200 | -1.94521000 |
| H | 6.28986000  | -1.88939400 | -1.12763000 |
| H | 5.54729500  | -3.25164500 | -0.24039700 |
| C | -2.83853700 | -1.04098400 | 0.27368800  |
| H | -2.09212800 | -1.71304400 | 0.68293300  |
| C | -4.09729800 | -1.52881900 | -0.00619700 |
| H | -4.34604700 | -2.56890900 | 0.19125000  |
| C | -4.77326000 | 0.63029000  | -0.85006000 |
| H | -5.51185300 | 1.30010900  | -1.28037100 |
| C | -3.50454300 | 1.11885300  | -0.56806300 |
| H | -3.30332100 | 2.16833100  | -0.77538000 |
| C | 3.32987600  | 2.01921200  | 0.05292800  |
| H | 4.12730000  | 1.28144900  | 0.06651500  |
| C | 3.62137400  | 3.35244000  | 0.31390400  |
| H | 4.64794400  | 3.64593000  | 0.51635700  |
| C | 2.60007500  | 4.29698900  | 0.33829900  |
| H | 2.81550400  | 5.33949600  | 0.55601500  |
| C | 1.29266600  | 3.89492000  | 0.09647800  |
| H | 0.48175100  | 4.61919400  | 0.12451000  |
| C | 3.43037000  | -3.43463400 | -1.88487100 |
| H | 3.29326900  | -4.01339500 | -0.94920300 |
| H | 2.44005500  | -3.12011700 | -2.22823400 |
| H | 3.85770600  | -4.09899100 | -2.64406000 |
| C | 3.72383300  | -1.32888200 | -0.76161600 |
| H | 3.27732100  | -1.82751400 | 0.12305500  |

|   |            |             |             |
|---|------------|-------------|-------------|
| H | 4.53422000 | -0.68958700 | -0.38615800 |
| C | 2.67232700 | -0.46907900 | -1.45657500 |
| H | 3.14511800 | 0.27822900  | -2.10139700 |
| H | 2.03608400 | -1.09638200 | -2.08952300 |

### Diltiazem<sub>I</sub><sub>5</sub>

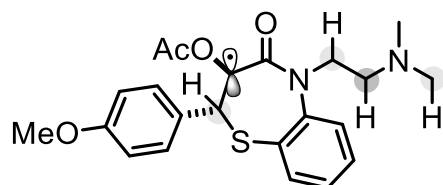

E = -1661.460941

H<sub>Corr.</sub> = 0.464167

|   |             |             |             |
|---|-------------|-------------|-------------|
| S | -0.65429100 | 1.96095700  | -1.20208700 |
| C | 0.74340800  | -0.55110600 | 0.02577700  |
| N | 1.75680000  | 0.14855100  | -0.56697900 |
| C | 0.95192700  | 2.47897600  | -0.63059000 |
| C | 1.96333900  | 1.53885200  | -0.36668000 |
| C | -2.60974200 | 0.57442500  | 0.08833400  |
| C | -5.14742900 | -0.46140000 | -0.49008000 |
| O | -6.41560700 | -0.87449100 | -0.73568300 |
| O | -0.59965000 | -0.39205500 | 2.03777900  |
| C | 0.39887200  | -0.82864200 | 2.87019900  |
| O | 1.56305900  | -0.59982400 | 2.65807000  |
| O | 0.63720400  | -1.77218900 | -0.08272400 |
| N | 4.39415800  | -2.41858000 | -1.31064300 |
| C | -6.60441400 | -2.18280900 | -1.23707000 |
| H | -7.68037900 | -2.30897800 | -1.36612800 |
| H | -6.10614400 | -2.31488200 | -2.20657400 |
| H | -6.23402100 | -2.93833000 | -0.53158100 |
| C | -0.23901400 | 0.19641400  | 0.85350600  |
| C | -0.17404000 | -1.59291700 | 4.01222500  |
| H | 0.59505700  | -1.75786200 | 4.76719100  |
| H | -1.02839200 | -1.06275800 | 4.44158300  |
| H | -0.53790000 | -2.55923200 | 3.64666900  |
| C | 5.66330500  | -2.79184700 | -0.71335300 |
| H | 6.15426600  | -3.55313300 | -1.33016800 |
| H | 6.32584500  | -1.92113900 | -0.65362900 |
| H | 5.54128900  | -3.20689300 | 0.30816400  |
| C | -3.75808000 | 1.34923000  | 0.28432500  |
| H | -3.66085700 | 2.36571000  | 0.66480000  |
| C | -5.01502100 | 0.84251200  | 0.00014400  |
| H | -5.91298200 | 1.43612000  | 0.15221800  |
| C | -4.01044400 | -1.24661500 | -0.69193100 |
| H | -4.08738800 | -2.26233700 | -1.06753200 |
| C | -2.75253900 | -0.72063200 | -0.40480600 |
| H | -1.86987200 | -1.34264000 | -0.55713500 |
| C | 3.21376500  | 1.98902400  | 0.06211900  |
| H | 3.98794300  | 1.26315800  | 0.29650100  |
| C | 3.46998000  | 3.34780000  | 0.20310900  |
| H | 4.45145300  | 3.67565200  | 0.53585400  |
| C | 2.47099800  | 4.27990000  | -0.06407700 |
| H | 2.66476000  | 5.34318800  | 0.05010300  |
| C | 1.21453700  | 3.84096400  | -0.46602400 |
| H | 0.41808300  | 4.55403100  | -0.66688700 |
| C | 3.55495000  | -3.59716800 | -1.45715200 |
| H | 3.35411800  | -4.08212800 | -0.48038100 |
| H | 2.58981700  | -3.34171200 | -1.90519000 |
| H | 4.04999900  | -4.32459400 | -2.11009400 |
| C | 3.73236700  | -1.38728600 | -0.52512600 |
| H | 3.23662800  | -1.80932000 | 0.37241800  |
| H | 4.50378700  | -0.69380300 | -0.16426300 |
| C | 2.71423200  | -0.62310400 | -1.36701600 |
| H | 3.21868900  | 0.06983600  | -2.04821400 |
| H | 2.13339400  | -1.32323100 | -1.97692200 |
| C | -1.25062300 | 1.16981800  | 0.36051600  |
| H | -1.35729000 | 1.97228600  | 1.10831000  |

### H radical

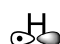

E = -0.499958

H<sub>Corr.</sub> = 0.00236

|   |            |            |            |
|---|------------|------------|------------|
| H | 0.00000000 | 0.00000000 | 0.00000000 |
|---|------------|------------|------------|

### TMS

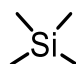

C<sub>NMR</sub> isotropic shielding tensor (ppm) =

176.72

|    |             |             |             |
|----|-------------|-------------|-------------|
| Si | -0.00000200 | -0.00004500 | 0.00002400  |
| C  | -0.39869400 | -1.83600700 | -0.10979800 |
| H  | 0.39806500  | -2.38209700 | -0.63007200 |
| H  | -0.51043800 | -2.27567600 | 0.88914700  |
| H  | -1.33433500 | -2.00419300 | -0.65752800 |
| C  | -1.39290500 | 0.89181200  | 0.89806400  |
| H  | -1.52144600 | 0.49968000  | 1.91464000  |
| H  | -1.18697700 | 1.96661500  | 0.97601500  |
| H  | -2.34561800 | 0.76977500  | 0.36780000  |
| C  | 1.60951700  | 0.23697800  | 0.94620200  |
| H  | 2.44067500  | -0.27403900 | 0.44443600  |
| H  | 1.86744200  | 1.30043800  | 1.02516200  |
| H  | 1.53204700  | -0.16646900 | 1.96351200  |
| C  | 0.18206600  | 0.70725800  | -1.73445200 |
| H  | -0.74337100 | 0.58243900  | -2.31039000 |
| H  | 0.41497000  | 1.77886400  | -1.70082500 |
| H  | 0.98911800  | 0.20504800  | -2.28232900 |

### 1-Phenyl-1-pyridineethane

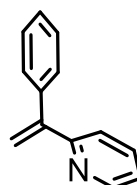

E = -556.458702

G<sub>Corr.</sub> = 0.16307

|   |             |             |             |
|---|-------------|-------------|-------------|
| C | 0.04200400  | -2.20243800 | 1.02110200  |
| H | 0.97033400  | -2.71621700 | 1.25982400  |
| H | -0.88418400 | -2.71231900 | 1.27557800  |
| C | 0.03128900  | -0.97497600 | 0.47869300  |
| C | 1.31842200  | -0.30225700 | 0.15208500  |
| C | 2.38642100  | -1.04602700 | -0.36897900 |
| C | 3.58718200  | -0.40591700 | -0.64150000 |
| H | 2.26307200  | -2.10532500 | -0.57740700 |
| C | 2.57644500  | 1.61923700  | 0.10213700  |
| C | 3.69425700  | 0.95920700  | -0.39701900 |
| H | 4.42555200  | -0.96464900 | -1.05061500 |
| H | 2.61495800  | 2.69112500  | 0.29733800  |
| H | 4.61269300  | 1.50319300  | -0.59789800 |
| C | -1.26460700 | -0.31399300 | 0.16956200  |
| C | -2.22776900 | -1.02967900 | -0.55420500 |
| C | -1.58010300 | 0.98131300  | 0.60074600  |
| C | -3.47226100 | -0.47445400 | -0.83583500 |
| H | -1.98667300 | -2.02923500 | -0.91211300 |
| C | -2.82736600 | 1.53311200  | 0.32269500  |
| H | -0.84178700 | 1.54881300  | 1.15817600  |
| C | -3.77727100 | 0.81125000  | -0.39665100 |

|   |             |             |             |
|---|-------------|-------------|-------------|
| H | -4.20165300 | -1.04620200 | -1.40523500 |
| H | -3.05854500 | 2.53625100  | 0.67429400  |
| H | -4.74848700 | 1.24922600  | -0.61510100 |
| N | 1.41640800  | 1.01701100  | 0.36802500  |

<sup>30</sup>I<sub>1</sub>

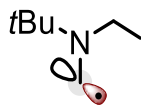

E = -370.207851

G<sub>Corr.</sub> = 0.209085

|   |             |             |             |
|---|-------------|-------------|-------------|
| N | 0.14983000  | -0.27351500 | -0.41323000 |
| C | 0.33899800  | -1.48800400 | -1.04803600 |
| H | -0.44776500 | -1.86292600 | -1.69231700 |
| H | 1.36065900  | -1.73609000 | -1.31960900 |
| C | 1.32943500  | 0.32865400  | 0.22641900  |
| C | 2.21411800  | 1.00377900  | -0.81469600 |
| C | 2.12835700  | -0.65041200 | 1.08364400  |
| H | 0.95687500  | 1.10968900  | 0.89977100  |
| H | 1.65330300  | 1.76681500  | -1.36696000 |
| H | 3.07813300  | 1.48219900  | -0.33760500 |
| H | 2.59273600  | 0.27128800  | -1.53887900 |
| H | 1.48124900  | -1.18319400 | 1.78938400  |
| H | 2.64801400  | -1.39738200 | 0.47228300  |
| H | 2.88864500  | -0.10453100 | 1.65497500  |
| C | -1.18787700 | 0.12613500  | 0.08653100  |
| C | -1.36492000 | 1.63675900  | -0.08581400 |
| C | -1.34891700 | -0.27049100 | 1.55775100  |
| H | -1.28111000 | 1.91059900  | -1.14491000 |
| H | -2.35823100 | 1.93635900  | 0.27042600  |
| H | -0.62979300 | 2.22218200  | 0.47729600  |
| H | -1.19930300 | -1.35166200 | 1.67420500  |
| H | -0.63343500 | 0.25056300  | 2.20564200  |
| H | -2.35733900 | -0.02173600 | 1.91253900  |
| C | -2.28656300 | -0.55658000 | -0.72266000 |
| H | -2.18158300 | -0.34875000 | -1.79455400 |
| H | -2.29817900 | -1.64151200 | -0.57104600 |
| H | -3.25747200 | -0.16635100 | -0.39687300 |

<sup>30</sup>I<sub>2</sub>

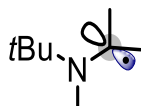

E = -370.206395

G<sub>Corr.</sub> = 0.207465

|   |             |             |             |
|---|-------------|-------------|-------------|
| N | 0.12997800  | -0.33329100 | -0.54649800 |
| C | 0.11704600  | -1.76417400 | -0.81489800 |
| H | -0.66054300 | -2.01096300 | -1.54521300 |
| H | 1.07508100  | -2.05156400 | -1.25860600 |
| H | -0.04403700 | -2.39859300 | 0.07586200  |
| C | 1.35799400  | 0.15116300  | -0.03171200 |
| C | 2.24997800  | -0.71821100 | 0.79187200  |
| C | 1.97268200  | 1.38078800  | -0.61488900 |
| H | 2.95825800  | -1.30928600 | 0.18105000  |
| H | 2.87006400  | -0.10052400 | 1.45679500  |
| H | 1.69305600  | -1.42798200 | 1.41544200  |
| H | 1.29437300  | 1.88602700  | -1.30788800 |
| H | 2.28115000  | 2.10298200  | 0.15796400  |
| H | 2.89146900  | 1.12957200  | -1.17628200 |
| C | -1.10980200 | 0.19412600  | 0.10395100  |
| C | -1.19149000 | -0.24366900 | 1.56954300  |
| C | -2.33909600 | -0.30268500 | -0.65285200 |
| H | -0.34042100 | 0.15646100  | 2.13673400  |
| H | -2.11382300 | 0.13047600  | 2.03239000  |

|   |             |             |             |
|---|-------------|-------------|-------------|
| H | -1.19175700 | -1.33656400 | 1.66951100  |
| H | -2.24720000 | -0.08704600 | -1.72519500 |
| H | -2.50746100 | -1.37804200 | -0.52497600 |
| H | -3.23158400 | 0.21134500  | -0.27624900 |
| C | -1.10553300 | 1.71866300  | 0.04851600  |
| H | -0.25915600 | 2.14351400  | 0.60051800  |
| H | -1.06221500 | 2.07380400  | -0.98867400 |
| H | -2.02578100 | 2.10341400  | 0.50512100  |

<sup>30</sup>TS I<sub>1</sub>-II<sub>1</sub>

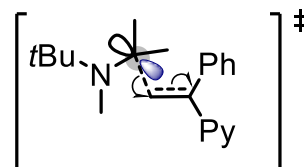

E = -926.672465

G<sub>Corr.</sub> = 0.393274

|   |             |             |             |
|---|-------------|-------------|-------------|
| C | -3.16181100 | 0.78631300  | -2.01605900 |
| C | -3.06681300 | 0.75559600  | -0.48673000 |
| H | -3.86136100 | 0.02476400  | -2.38174200 |
| H | -3.51872500 | 1.76727300  | -2.35395400 |
| H | -2.18711700 | 0.60662700  | -2.48394600 |
| C | -2.10232400 | 1.84059500  | -0.00297100 |
| H | -2.06045100 | 1.85567000  | 1.09376700  |
| H | -1.08087800 | 1.70152000  | -0.37617100 |
| H | -2.44747800 | 2.82356900  | -0.34645300 |
| N | -2.57084700 | -0.57379900 | -0.02801400 |
| C | -3.47474000 | -1.62265400 | 0.47013300  |
| C | -2.81364200 | -2.45551300 | 1.56179200  |
| C | -4.00851700 | -2.50590200 | -0.65469700 |
| H | -4.32210300 | -1.11429800 | 0.94020400  |
| H | -2.38912600 | -1.81352200 | 2.34190100  |
| H | -3.56072700 | -3.11206300 | 2.02199700  |
| H | -2.01352300 | -3.09717800 | 1.17156600  |
| H | -4.58465900 | -1.92530300 | -1.38449200 |
| H | -3.18284400 | -2.99544000 | -1.18757600 |
| H | -4.66285400 | -3.28906000 | -0.25293900 |
| C | -1.30340000 | -0.95054100 | -0.38109400 |
| H | -1.09321900 | -2.01475500 | -0.45145200 |
| H | -0.74177600 | -0.30739000 | -1.05216700 |
| C | 0.36836500  | -0.58234800 | 1.37615000  |
| H | -0.36586600 | 0.10203700  | 1.79263400  |
| H | 0.29730300  | -1.61422000 | 1.71242000  |
| C | 1.48326000  | -0.10754300 | 0.73916200  |
| C | -4.44198000 | 1.06600400  | 0.09507000  |
| H | -4.72519400 | 2.07884900  | -0.21291200 |
| H | -5.22198100 | 0.38717300  | -0.26998500 |
| H | -4.43379600 | 1.04384600  | 1.19191000  |
| C | 1.58257200  | 1.34130200  | 0.46181400  |
| C | 1.27882400  | 2.28274400  | 1.45409800  |
| C | 1.89284600  | 1.81544800  | -0.82202400 |
| C | 1.26635000  | 3.64611200  | 1.17373000  |
| H | 1.05757800  | 1.93555700  | 2.46243500  |
| C | 1.87507500  | 3.17618500  | -1.10658000 |
| H | 2.13586500  | 1.10222100  | -1.60752600 |
| C | 1.55915700  | 4.09994400  | -0.11033900 |
| H | 1.03253800  | 4.35693800  | 1.96367700  |
| H | 2.10704300  | 3.51860400  | -2.11294500 |
| H | 1.54919100  | 5.16462300  | -0.33235400 |
| C | 2.50846700  | -1.02056800 | 0.22446600  |
| C | 2.24252200  | -2.38954300 | 0.02094900  |
| C | 4.68807800  | -1.32430000 | -0.46586300 |
| C | 3.25452900  | -3.22490100 | -0.42200100 |
| H | 1.24515400  | -2.78584500 | 0.19472700  |
| C | 4.51700400  | -2.69059300 | -0.67133300 |
| H | 5.65748100  | -0.86208100 | -0.65860100 |
| H | 3.05821800  | -4.28267400 | -0.58346200 |
| H | 5.33979900  | -3.30659600 | -1.02276200 |
| N | 3.72950100  | -0.50675300 | -0.03510600 |



**<sup>30</sup>TS I<sub>2</sub>-II<sub>2</sub>**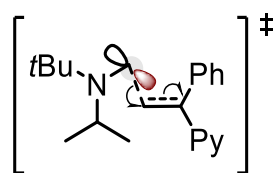

E = -926.669875

G<sub>Corr.</sub> = 0.397047

|   |             |             |             |
|---|-------------|-------------|-------------|
| N | -2.64373400 | -0.28090900 | 0.61867800  |
| C | -3.62222000 | -0.64023000 | -0.45972900 |
| C | -3.68374600 | 0.47763500  | -1.51338200 |
| C | -4.99893600 | -0.82705000 | 0.18365700  |
| H | -2.70139300 | 0.65158600  | -1.96946100 |
| H | -4.37711700 | 0.18275900  | -2.30984700 |
| H | -4.04258200 | 1.42952800  | -1.11076500 |
| H | -4.97142800 | -1.65275400 | 0.90527300  |
| H | -5.34262400 | 0.07167500  | 0.70794000  |
| H | -5.74517400 | -1.06505500 | -0.58489000 |
| C | -1.45031200 | -0.93861200 | 0.90543900  |
| C | -0.00741000 | -0.55873600 | -0.94852200 |
| H | -0.00900800 | -1.59682100 | -1.27644000 |
| H | -0.81327900 | 0.07675700  | -1.29745200 |
| C | 1.17949300  | 0.03800200  | -0.57979200 |
| C | -2.77440000 | 1.09309200  | 1.08834000  |
| H | -2.13166600 | 1.79305500  | 0.52762200  |
| H | -3.80894200 | 1.42508400  | 0.98729900  |
| H | -2.52772600 | 1.16673200  | 2.14985000  |
| C | -1.45051000 | -2.44566600 | 1.02024100  |
| H | -1.33636700 | -2.98626200 | 0.07613500  |
| H | -0.62170900 | -2.75628500 | 1.66607600  |
| H | -2.37976700 | -2.79945300 | 1.49221100  |
| C | -0.57717500 | -0.28614200 | 1.93860200  |
| H | -1.03059900 | -0.35703600 | 2.94260000  |
| H | 0.38783000  | -0.80138300 | 1.98004200  |
| H | -0.36803000 | 0.76874600  | 1.73587200  |
| C | 2.38525400  | -0.78178200 | -0.36314700 |
| C | 3.66304600  | -0.32396800 | -0.73204600 |
| C | 2.29210000  | -2.08876500 | 0.14523400  |
| C | 4.78841500  | -1.12727400 | -0.58992400 |
| H | 3.76939500  | 0.67000400  | -1.16309400 |
| C | 3.41732400  | -2.89443000 | 0.28694300  |
| H | 1.31867400  | -2.47623400 | 0.44094500  |
| C | 4.67514900  | -2.41833400 | -0.07535000 |
| H | 5.76082700  | -0.74528500 | -0.89383800 |
| H | 3.30989900  | -3.89933800 | 0.69018900  |
| H | 5.55595400  | -3.04590000 | 0.03751800  |
| C | 1.19565700  | 1.48280600  | -0.32438200 |
| C | 2.15201300  | 2.08350300  | 0.52091900  |
| C | 0.13797700  | 3.52149600  | -0.58409900 |
| C | 2.07436300  | 3.43840100  | 0.79640600  |
| H | 2.92824800  | 1.47712000  | 0.98015500  |
| C | 1.04710500  | 4.19202100  | 0.22925200  |
| H | -0.68810000 | 4.06904400  | -1.04228700 |
| H | 2.80315700  | 3.90223400  | 1.45761300  |
| H | 0.94716800  | 5.25770500  | 0.41416500  |
| N | 0.19392600  | 2.22024600  | -0.85819200 |
| C | -3.28623900 | -1.92671100 | -1.21034700 |
| H | -2.29114700 | -1.89842500 | -1.66566600 |
| H | -3.37361500 | -2.81813100 | -0.58448500 |
| H | -4.01389400 | -2.03457000 | -2.02256600 |

**<sup>27</sup>TS I<sub>1</sub>-II<sub>1</sub>**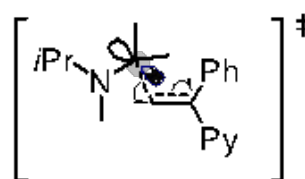

E = -887.384683

G<sub>Corr.</sub> = 0.36641

|   |             |              |             |
|---|-------------|--------------|-------------|
| C | -3.16181100 | 0.78631300   | -2.01605900 |
| C | -3.06681300 | 0.75559600   | -0.48673000 |
| H | -3.86136100 | 0.02476400   | -2.38174200 |
| H | -3.51872500 | 1.76727300   | -2.35395400 |
| H | -2.18711700 | 0.60662700   | -2.48394600 |
| C | -2.10232400 | 1.84059500   | -0.00297100 |
| H | -2.06045100 | 1.85567000   | 1.09376700  |
| H | -1.08087800 | 1.70152000   | -0.37617100 |
| H | -2.44747800 | 2.82356900   | -0.34645300 |
| N | -2.57084700 | -0.57379900  | -0.02801400 |
| C | -3.47474000 | -1.622265400 | 0.47013300  |
| C | -2.81364200 | -2.45551300  | 1.56179200  |
| C | -4.00851700 | -2.50590200  | -0.65469700 |
| H | -4.32210300 | -1.11429800  | 0.94020400  |
| H | -2.38912600 | -1.81352200  | 2.34190100  |
| H | -3.56072700 | -3.11206300  | 2.02199700  |
| H | -2.01352300 | -3.09717800  | 1.17156600  |
| H | -4.58465900 | -1.92530300  | -1.38449200 |
| H | -3.18284400 | -2.99544000  | -1.18757600 |
| H | -4.66285400 | -3.28906000  | -0.25293900 |
| C | -1.30340000 | -0.95054100  | -0.38109400 |
| H | -1.09321900 | -2.01475500  | -0.45145200 |
| H | -0.74177600 | -0.30739000  | -1.05216700 |
| C | 0.36836500  | -0.58234800  | 1.37615000  |
| H | -0.36586600 | 0.10203700   | 1.79263400  |
| H | 0.29730300  | -1.61422000  | 1.71242000  |
| C | 1.48326000  | -0.10754300  | 0.73916200  |
| C | -4.44198000 | 1.06600400   | 0.09507000  |
| H | -4.72519400 | 2.07884900   | -0.21291200 |
| H | -5.22198100 | 0.38717300   | -0.26998500 |
| H | -4.43379600 | 1.04384600   | 1.19191000  |
| C | 1.58257200  | 1.34130200   | 0.46181400  |
| C | 1.27882400  | 2.28274400   | 1.45409800  |
| C | 1.89284600  | 1.81544800   | -0.82202400 |
| C | 1.26635000  | 3.64611200   | 1.17373000  |
| H | 1.05757800  | 1.93555700   | 2.46243500  |
| C | 1.87507500  | 3.17618500   | -1.10658000 |
| H | 2.13586500  | 1.10222100   | -1.60752600 |
| C | 1.55915700  | 4.09994400   | -0.11033900 |
| H | 1.03253800  | 4.35693800   | 1.96367700  |
| H | 2.10704300  | 3.51860400   | -2.11294500 |
| H | 1.54919100  | 5.16462300   | -0.33235400 |
| C | 2.50846700  | -1.02056800  | 0.22446600  |
| C | 2.24252200  | -2.38954300  | 0.02094900  |
| C | 4.68807800  | -1.32430000  | -0.46586300 |
| C | 3.25452900  | -3.22490100  | -0.42200100 |
| H | 1.24515400  | -2.78584500  | 0.19472700  |
| C | 4.51700400  | -2.69059300  | -0.67133300 |
| H | 5.65748100  | -0.86208100  | -0.65860100 |
| H | 3.05821800  | -4.28267400  | -0.58346200 |
| H | 5.33979900  | -3.30659600  | -1.02276200 |
| N | 3.72950100  | -0.50675300  | -0.03510600 |

**<sup>27</sup>TS I<sub>2</sub>-II<sub>2</sub>**

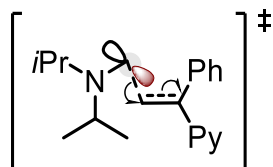

$$E = -887.389996$$

$$G_{\text{Corr.}} = 0.368372$$

|   |             |             |             |
|---|-------------|-------------|-------------|
| N | -2.64373400 | -0.28090900 | 0.61867800  |
| C | -3.62222000 | -0.64023000 | -0.45972900 |
| C | -3.68374600 | 0.47763500  | -1.51338200 |
| C | -4.99893600 | -0.82705000 | 0.18365700  |
| H | -2.70139300 | 0.65158600  | -1.96946100 |
| H | -4.37711700 | 0.18275900  | -2.30984700 |
| H | -4.04258200 | 1.42952800  | -1.11076500 |
| H | -4.97142800 | -1.65275400 | 0.90527300  |
| H | -5.34262400 | 0.07167500  | 0.70794000  |
| H | -5.74517400 | -1.06505500 | -0.58489000 |
| C | -1.45031200 | -0.93861200 | 0.90543900  |
| C | -0.00741000 | -0.55873600 | -0.94852200 |
| H | -0.00900800 | -1.59682100 | -1.27644000 |
| H | -0.81327900 | 0.07675700  | -1.29745200 |
| C | 1.17949300  | 0.03800200  | -0.57979200 |
| C | -2.77440000 | 1.09309200  | 1.08834000  |
| H | -2.13166600 | 1.79305500  | 0.52762200  |
| H | -3.80894200 | 1.42508400  | 0.98729900  |
| H | -2.52772600 | 1.16673200  | 2.14985000  |
| C | -1.45051000 | -2.44566600 | 1.02024100  |
| H | -1.33636700 | -2.98626200 | 0.07613500  |
| H | -0.62170900 | -2.75628500 | 1.66607600  |
| H | -2.37976700 | -2.79945300 | 1.49221100  |
| C | -0.57717500 | -0.28614200 | 1.93860200  |
| H | -1.03059900 | -0.35703600 | 2.94260000  |
| H | 0.38783000  | -0.80138300 | 1.98004200  |
| H | -0.36803000 | 0.76874600  | 1.73587200  |
| C | 2.38525400  | -0.78178200 | -0.36314700 |
| C | 3.66304600  | -0.32396800 | -0.73204600 |
| C | 2.29210000  | -2.08876500 | 0.14523400  |
| C | 4.78841500  | -1.12727400 | -0.58992400 |
| H | 3.76939500  | 0.67000400  | -1.16309400 |
| C | 3.41732400  | -2.89443000 | 0.28694300  |
| H | 1.31867400  | -2.47623400 | 0.44094500  |
| C | 4.67514900  | -2.41833400 | -0.07535000 |
| H | 5.76082700  | -0.74528500 | -0.89383800 |
| H | 3.30989900  | -3.89933800 | 0.69018900  |
| H | 5.55595400  | -3.04590000 | 0.03751800  |
| C | 1.19565700  | 1.48280600  | -0.32438200 |
| C | 2.15201300  | 2.08350300  | 0.52091900  |
| C | 0.13797700  | 3.52149600  | -0.58409900 |
| C | 2.07436300  | 3.43840100  | 0.79640600  |
| H | 2.92824800  | 1.47712000  | 0.98015500  |
| C | 1.04710500  | 4.19202100  | 0.22925200  |
| H | -0.68810000 | 4.06904400  | -1.04228700 |
| H | 2.80315700  | 3.90223400  | 1.45761300  |
| H | 0.94716800  | 5.25770500  | 0.41416500  |
| N | 0.19392600  | 2.22024600  | -0.85819200 |
| C | -3.28623900 | -1.92671100 | -1.21034700 |
| H | -2.29114700 | -1.89842500 | -1.66566600 |
| H | -3.37361500 | -2.81813100 | -0.58448500 |
| H | -4.01389400 | -2.03457000 | -2.02256600 |

$^{27}\Pi_1$

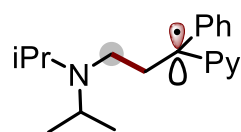

$$E = -887.4253372$$

$$G_{\text{Corr.}} = 0.37095$$

|   |             |             |             |
|---|-------------|-------------|-------------|
| C | -3.16181100 | 0.78631300  | -2.01605900 |
| C | -3.06681300 | 0.75559600  | -0.48673000 |
| H | -3.86136100 | 0.02476400  | -2.38174200 |
| H | -3.51872500 | 1.76727300  | -2.35395400 |
| H | -2.18711700 | 0.60662700  | -2.48394600 |
| C | -2.10232400 | 1.84059500  | -0.00297100 |
| H | -2.06045100 | 1.85567000  | 1.09376700  |
| H | -1.08087800 | 1.70152000  | -0.37617100 |
| H | -2.44747800 | 2.82356900  | -0.34645300 |
| N | -2.57084700 | -0.57379900 | -0.02801400 |
| C | -3.47474000 | -1.62265400 | 0.47013300  |
| C | -2.81364200 | -2.45551300 | 1.56179200  |
| C | -4.00851700 | -2.50590200 | -0.65469700 |
| H | -4.32210300 | -1.11429800 | 0.94020400  |
| H | -2.38912600 | -1.81352200 | 2.34190100  |
| H | -3.56072700 | -3.11206300 | 2.02199700  |
| H | -2.01352300 | -3.09717800 | 1.17156600  |
| H | -4.58465900 | -1.92530300 | -1.38449200 |
| H | -3.18284400 | -2.99544000 | -1.18757600 |
| H | -4.66285400 | -3.28906000 | -0.25293900 |
| C | -1.30340000 | -0.95054100 | -0.38109400 |
| H | -1.09321900 | -2.01475500 | -0.45145200 |
| H | -0.74177600 | -0.30739000 | -1.05216700 |
| C | 0.36836500  | -0.58234800 | 1.37615000  |
| H | -0.36586600 | 0.10203700  | 1.79263400  |
| H | 0.29730300  | -1.61422000 | 1.71242000  |
| C | 1.48326000  | -0.10754300 | 0.73916200  |
| C | -4.44198000 | 1.06600400  | 0.09507000  |
| H | -4.72519400 | 2.07884900  | -0.21291200 |
| H | -5.22198100 | 0.38717300  | -0.26998500 |
| H | -4.43379600 | 1.04384600  | 1.19191000  |
| C | 1.58257200  | 1.34130200  | 0.46181400  |
| C | 1.27882400  | 2.28274400  | 1.45409800  |
| C | 1.89284600  | 1.81544800  | -0.82202400 |
| C | 1.26635000  | 3.64611200  | 1.17373000  |
| H | 1.05757800  | 1.93555700  | 2.46243500  |
| C | 1.87507500  | 3.17618500  | -1.10658000 |
| H | 2.13586500  | 1.10222100  | -1.60752600 |
| C | 1.55915700  | 4.09994400  | -0.11033900 |
| H | 1.03253800  | 4.35693800  | 1.96367700  |
| H | 2.10704300  | 3.51860400  | -2.11294500 |
| H | 1.54919100  | 5.16462300  | -0.33235400 |
| C | 2.50846700  | -1.02056800 | 0.22446600  |
| C | 2.24252200  | -2.38954300 | 0.02094900  |
| C | 4.68807800  | -1.32430000 | -0.46586300 |
| C | 3.25452900  | -3.22490100 | -0.42200100 |
| H | 1.24515400  | -2.78584500 | 0.19472700  |
| C | 4.51700400  | -2.69059300 | -0.67133300 |
| H | 5.65748100  | -0.86208100 | -0.65860100 |
| H | 3.05821800  | -4.28267400 | -0.58346200 |
| H | 5.33979900  | -3.30659600 | -1.02276200 |
| N | 3.72950100  | -0.50675300 | -0.03510600 |

$^{27}\Pi_2$

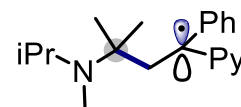

$$E = -887.4227282$$

$$G_{\text{Corr.}} = 0.374989$$

|   |             |             |             |
|---|-------------|-------------|-------------|
| N | -2.64373400 | -0.28090900 | 0.61867800  |
| C | -3.62222000 | -0.64023000 | -0.45972900 |
| C | -3.68374600 | 0.47763500  | -1.51338200 |
| C | -4.99893600 | -0.82705000 | 0.18365700  |
| H | -2.70139300 | 0.65158600  | -1.96946100 |
| H | -4.37711700 | 0.18275900  | -2.30984700 |
| H | -4.04258200 | 1.42952800  | -1.11076500 |
| H | -4.97142800 | -1.65275400 | 0.90527300  |
| H | -5.34262400 | 0.07167500  | 0.70794000  |

|   |             |             |             |   |             |             |             |
|---|-------------|-------------|-------------|---|-------------|-------------|-------------|
| H | -5.74517400 | -1.06505500 | -0.58489000 | H | 3.76939500  | 0.67000400  | -1.16309400 |
| C | -1.45031200 | -0.93861200 | 0.90543900  | C | 3.41732400  | -2.89443000 | 0.28694300  |
| C | -0.00741000 | -0.55873600 | -0.94852200 | H | 1.31867400  | -2.47623400 | 0.44094500  |
| H | -0.00900800 | -1.59682100 | -1.27644000 | C | 4.67514900  | -2.41833400 | -0.07535000 |
| H | -0.81327900 | 0.07675700  | -1.29745200 | H | 5.76082700  | -0.74528500 | -0.89383800 |
| C | 1.17949300  | 0.03800200  | -0.57979200 | H | 3.30989900  | -3.89933800 | 0.69018900  |
| C | -2.77440000 | 1.09309200  | 1.08834000  | H | 5.55595400  | -3.04590000 | 0.03751800  |
| H | -2.13166600 | 1.79305500  | 0.52762200  | C | 1.19565700  | 1.48280600  | -0.32438200 |
| H | -3.80894200 | 1.42508400  | 0.98729900  | C | 2.15201300  | 2.08350300  | 0.52091900  |
| H | -2.52772600 | 1.16673200  | 2.14985000  | C | 0.13797700  | 3.52149600  | -0.58409900 |
| C | -1.45051000 | -2.44566600 | 1.02024100  | C | 2.07436300  | 3.43840100  | 0.79640600  |
| H | -1.33636700 | -2.98626200 | 0.07613500  | H | 2.92824800  | 1.47712000  | 0.98015500  |
| H | -0.62170900 | -2.75628500 | 1.66607600  | C | 1.04710500  | 4.19202100  | 0.22925200  |
| H | -2.37976700 | -2.79945300 | 1.49221100  | H | -0.68810000 | 4.06904400  | -1.04228700 |
| C | -0.57717500 | -0.28614200 | 1.93860200  | H | 2.80315700  | 3.90223400  | 1.45761300  |
| H | -1.03059900 | -0.35703600 | 2.94260000  | H | 0.94716800  | 5.25770500  | 0.41416500  |
| H | 0.38783000  | -0.80138300 | 1.98004200  | N | 0.19392600  | 2.22024600  | -0.85819200 |
| H | -0.36803000 | 0.76874600  | 1.73587200  | C | -3.28623900 | -1.92671100 | -1.21034700 |
| C | 2.38525400  | -0.78178200 | -0.36314700 | H | -2.29114700 | -1.89842500 | -1.66566600 |
| C | 3.66304600  | -0.32396800 | -0.73204600 | H | -3.37361500 | -2.81813100 | -0.58448500 |
| C | 2.29210000  | -2.08876500 | 0.14523400  | H | -4.01389400 | -2.03457000 | -2.02256600 |
| C | 4.78841500  | -1.12727400 | -0.58992400 |   |             |             |             |

## V. $\alpha$ -C(sp<sup>3</sup>)-H alkylation by dynamic radical trapping

General Procedure A for Alkylation: A 8.0 mL disposable borosilicate glass tube with screw cap containing a stirring bar was charged with TPS-SH (10 mol%, 5.9 mg, 0.02 mmol), Ir(ppy)<sub>2</sub>(dtbbpy)PF<sub>6</sub> (1 mol%, 1.8 mg, 0.002 mmol), trialkylamine (0.6 mmol, added after solvent if volatile liquid) and olefin (0.2 mmol, added after solvent if liquid). The tube was transferred to a nitrogen-filled glove-box where the dry Tol (2.0 mL, 0.1 M) was added. Then the reaction was stirred for 1 minute and transferred outside, placing ~10 cm away from a Kessil blue LED (34W maximum, 24 VDC) and rigorously stirred for the mentioned time (4~16 h) with cooling by fan. After completion of the reaction, the product was directly purified by flash column chromatography in silica gel with CHCl<sub>3</sub>/MeOH.

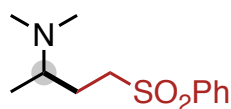

6

***N,N*-dimethyl-4-(phenylsulfonyl)butan-2-amine:** Following the general procedure A, the title compound was obtained in 86% yield after 4 h as colorless oil. <sup>1</sup>H NMR (400 MHz, CDCl<sub>3</sub>)  $\delta$  7.92-7.90 (m, 2H), 7.65-7.62 (m, 1H), 7.57-7.53 (m, 2H), 3.30-3.23 (m, 1H), 3.15-3.07 (m, 1H), 2.60-2.51 (m, 1H), 2.10 (s, 6H), 1.81-1.72 (m, 2H), 0.90 (d,  $J$  = 6.5 Hz, 3H). <sup>13</sup>C NMR (101 MHz, CDCl<sub>3</sub>)  $\delta$  139.65, 133.77, 129.45, 128.19, 57.71, 53.85, 40.25, 26.80, 12.71. IR (CDCl<sub>3</sub>, cm<sup>-1</sup>): 3063, 2960, 2928, 1447, 1304, 1286, 1086, 737. HRMS *calcd.* for (C<sub>12</sub>H<sub>20</sub>NO<sub>2</sub>S) [M+H]<sup>+</sup>: 242.1215, *found* 242.1238.

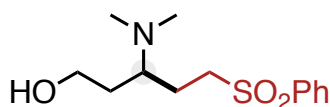

7

**3-(dimethylamino)-5-(phenylsulfonyl)pentan-1-ol:** Following the general procedure A, the title compound was obtained in 53% yield after 8 h as colorless oil. <sup>1</sup>H NMR (400 MHz, CDCl<sub>3</sub>)  $\delta$  7.92-7.90 (m, 2H), 7.69-7.65 (m, 1H), 7.60-7.56 (m, 2H), 3.76-3.68 (m, 2H), 3.13-3.04 (m, 2H), 2.78-2.71 (m, 1H), 2.27 (s, 6H), 2.08-1.99 (m, 1H), 1.81-1.71 (m, 1H), 1.71-1.60 (m, 1H), 1.38-1.32 (m, 1H), 1.04 (s, 1H). <sup>13</sup>C NMR (101 MHz, CDCl<sub>3</sub>)  $\delta$  139.34, 133.99, 129.53, 128.06, 63.74, 62.76, 54.31, 40.03, 30.78, 20.52. IR (CDCl<sub>3</sub>, cm<sup>-1</sup>): 3372, 3061, 2943, 2781, 1306, 1083, 739, 690. HRMS *calcd.* for (C<sub>13</sub>H<sub>22</sub>NO<sub>3</sub>S) [M+H]<sup>+</sup>: 272.1320, *found* 272.1323.

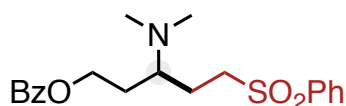

8

**3-(dimethylamino)-5-(phenylsulfonyl)pentyl benzoate:** Following the general procedure A, the title compound was obtained in 86% yield after 8 h as yellow oil.  $^1\text{H}$  NMR (500 MHz,  $\text{CDCl}_3$ )  $\delta$  8.06 (d,  $J = 7.4$  Hz, 2H), 7.58 (t,  $J = 7.3$  Hz, 1H), 7.46 (t,  $J = 7.5$  Hz, 2H), 4.44-4.37 (m, 2H), 2.62-2.26 (m, 9H), 2.00-1.93 (m, 1H), 1.85-1.60 (m, 3H), 1.46 (s, 9H).  $^{13}\text{C}$  NMR (126 MHz,  $\text{CDCl}_3$ )  $\delta$  173.19, 166.67, 132.93, 130.52, 129.61, 128.43, 80.14, 63.41, 60.33, 40.26, 33.11, 28.20, 25.06. IR ( $\text{CDCl}_3$ ,  $\text{cm}^{-1}$ ): 3064, 2966, 2931, 1718, 1452, 1270, 1147, 710. IR ( $\text{CDCl}_3$ ,  $\text{cm}^{-1}$ ): 3060, 3028, 2934, 1727, 1436, 1278, 970, 687. HRMS *calcd.* for ( $\text{C}_{20}\text{H}_{26}\text{NO}_4\text{S}$ )  $[\text{M}+\text{H}]^+$ : 376.1583, *found* 376.1578.

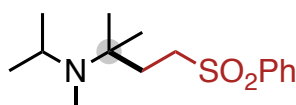

9

***N*-isopropyl-*N*,2-dimethyl-4-(phenylsulfonyl)butan-2-amine:** Following the general procedure A, the title compound was obtained in 86% yield after 8 h as colorless oil.  $^1\text{H}$  NMR (400 MHz,  $\text{CDCl}_3$ )  $\delta$  7.91 (d,  $J = 7.3$  Hz, 2H), 7.64 (t,  $J = 7.4$  Hz, 1H), 7.56 (t,  $J = 7.5$  Hz, 2H), 3.19-3.15 (m, 2H), 3.04 (dt,  $J = 12.9, 6.4$  Hz, 1H), 1.97 (s, 3H), 1.77-1.73 (m, 2H), 0.98 (s, 6H), 0.90 (d,  $J = 6.5$  Hz, 1H).  $^{13}\text{C}$  NMR (101 MHz,  $\text{CDCl}_3$ )  $\delta$  139.66, 133.58, 129.31, 128.08, 56.10, 52.39, 45.79, 33.66, 26.63, 24.94, 21.06. IR ( $\text{CDCl}_3$ ,  $\text{cm}^{-1}$ ): 2970, 2876, 2788, 1462, 1292, 1086, 955, 742. HRMS *calcd.* for ( $\text{C}_{15}\text{H}_{26}\text{NO}_2\text{S}$ )  $[\text{M}+\text{H}]^+$ : 284.1684, *found* 284.1691.

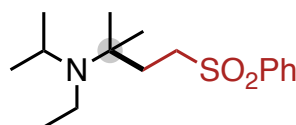

10

***N*-ethyl-*N*-isopropyl-2-methyl-4-(phenylsulfonyl)butan-2-amine:** Following the general procedure A, the title compound was obtained in 38% yield after 8 h as yellow oil.  $^1\text{H}$  NMR (400 MHz,  $\text{CDCl}_3$ )  $\delta$  7.93-7.91 (m, 2H), 7.67-7.63 (m, 1H), 7.59-7.55 (m, 3H), 3.24-3.19 (m, 2H), 3.00 (p,  $J = 6.6$  Hz, 1H), 2.46 (q,  $J = 7.0$  Hz, 2H), 1.77-1.73 (m, 2H), 1.01 (s, 6H), 0.93 (d,  $J = 6.6$  Hz, 6H), 0.91 (t,  $J = 7.1$  Hz, 3H).  $^{13}\text{C}$  NMR (101 MHz,  $\text{CDCl}_3$ )  $\delta$  139.72, 133.61, 129.35, 128.15, 57.09, 52.63, 46.48, 35.34, 34.32, 26.56, 22.49, 20.27. IR ( $\text{CDCl}_3$ ,  $\text{cm}^{-1}$ ): 2970, 2927, 2872, 1446, 1303, 1087, 743, 689. HRMS *calcd.* for ( $\text{C}_{16}\text{H}_{28}\text{NO}_2\text{S}$ )  $[\text{M}+\text{H}]^+$ : 298.1841, *found* 298.1853.

*Note:* ratio was obtained by GC-MS, the other regioisomer decomposed during purification.

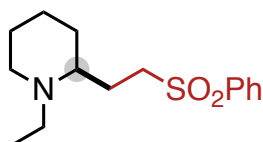

65

## 11

**1-ethyl-2-(2-(phenylsulfonyl)ethyl)piperidine:** Following the general procedure A, the title compound was obtained in 53% yield after 8 h as colorless oil.  $^1\text{H}$  NMR (400 MHz,  $\text{CDCl}_3$ )  $\delta$  7.91 (d,  $J = 7.1$  Hz, 2H), 7.65 (t,  $J = 7.4$  Hz, 1H), 7.56 (t,  $J = 7.5$  Hz, 2H), 3.24-3.06 (m, 2H), 2.82 (d,  $J = 11.6$  Hz, 1H), 2.65-2.56 (m, 1H), 2.37-2.26 (m, 2H), 2.15 (t,  $J = 10.7$  Hz, 1H), 2.04-1.96 (m, 1H), 1.89-1.82 (m, 1H), 1.65-1.37 (m, 4H), 1.29-1.19 (m, 2H), 0.94 (t,  $J = 7.0$  Hz, 1H).  $^{13}\text{C}$  NMR (101 MHz,  $\text{CDCl}_3$ )  $\delta$  139.47, 133.74, 129.38, 128.13, 57.77, 52.32, 51.02, 46.65, 30.06, 25.14, 24.40, 23.78, 10.60. IR ( $\text{CDCl}_3$ ,  $\text{cm}^{-1}$ ): 2930, 2855, 2796, 1446, 1304, 1086, 732, 689. HRMS *calcd.* for ( $\text{C}_{15}\text{H}_{24}\text{NO}_2\text{S}$ )  $[\text{M}+\text{H}]^+$ : 282.1528, *found* 282.1537.

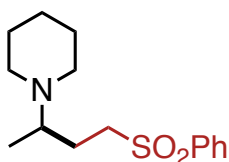

## 11'

**1-(4-(phenylsulfonyl)butan-2-yl)piperidine:** Following the general procedure A, the title compound was obtained in 23% yield after 8 h as colorless oil.  $^1\text{H}$  NMR (400 MHz,  $\text{CDCl}_3$ )  $\delta$  7.92 (d,  $J = 7.3$  Hz, 2H), 7.65 (t,  $J = 7.4$  Hz, 1H), 7.57 (t,  $J = 7.6$  Hz, 2H), 3.39-3.32 (m, 1H), 3.18-3.10 (m, 1H), 2.57-2.16 (m, 5H), 1.85-1.64 (m, 2H), 1.49-1.38 (m, 6H), 0.90 (d,  $J = 6.0$  Hz, 3H).  $^{13}\text{C}$  NMR (101 MHz,  $\text{CDCl}_3$ )  $\delta$  139.63, 133.63, 129.36, 128.13, 58.20, 53.94, 49.12, 26.71, 26.53, 24.94, 13.45. IR ( $\text{CDCl}_3$ ,  $\text{cm}^{-1}$ ): 2932, 2851, 2798, 1446, 1303, 1144, 1086, 744. HRMS *calcd.* for ( $\text{C}_{15}\text{H}_{24}\text{NO}_2\text{S}$ )  $[\text{M}+\text{H}]^+$ : 282.1528, *found* 282.1536.

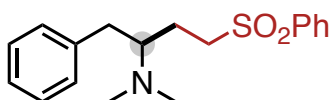

## 12

***N,N*-dimethyl-1-phenyl-4-(phenylsulfonyl)butan-2-amine:** Following the general procedure A, the title compound was obtained in 70% yield after 8 h as colorless oil.  $^1\text{H}$  NMR (400 MHz,  $\text{CDCl}_3$ )  $\delta$  7.78 (d,  $J = 8.1$  Hz, 2H), 7.60 (t,  $J = 7.4$  Hz, 1H), 7.49 (t,  $J = 7.6$  Hz, 2H), 7.28-7.24 (m, 2H), 7.21-7.17 (m, 1H), 7.08-7.07 (m, 2H), 3.31-3.24 (m, 1H), 3.01-2.94 (m, 2H), 2.64-2.58 (m, 1H), 2.23 (s, 6H), 2.23-2.18 (m, 1H), 1.77-1.71 (m, 2H).  $^{13}\text{C}$  NMR (101 MHz,  $\text{CDCl}_3$ )  $\delta$  139.79, 139.47, 133.51, 129.25, 129.21, 128.68, 128.08, 126.23, 64.74, 53.67, 40.11, 33.53, 23.73. IR ( $\text{CDCl}_3$ ,  $\text{cm}^{-1}$ ): 3099, 3060, 3028, 2934, 1506, 1086, 738, 690. HRMS *calcd.* for ( $\text{C}_{18}\text{H}_{24}\text{NO}_2\text{S}$ )  $[\text{M}+\text{H}]^+$ : 318.1528, *found* 318.1546.

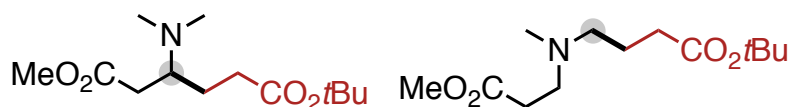

**13 (5:1)**

**6-(*tert*-butyl) 1-methyl 3-(dimethylamino)hexanedioate** (major) : Following the general procedure A, the title compound was obtained in 89% yield after 8 h as a mixture of yellow oil. <sup>1</sup>H NMR (500 MHz, CDCl<sub>3</sub>) δ 3.64 (s, 3H), 2.93-2.18 (m, 11H), 1.72-1.56 (m, 2H), 1.41 (s, 9H). <sup>13</sup>C NMR (126 MHz, CDCl<sub>3</sub>) δ 173.52, 173.07, 80.09, 60.58, 51.75, 40.19, 33.47, 32.90, 28.19, 26.59. IR (CDCl<sub>3</sub>, cm<sup>-1</sup>): 2932, 2867, 1728, 1454, 1366, 1223, 1148, 1044. IR (CDCl<sub>3</sub>, cm<sup>-1</sup>): 2945, 2781, 1731, 1723, 1446, 1254, 1227, 845. HRMS *calcd.* for (C<sub>13</sub>H<sub>26</sub>NO<sub>4</sub>) [M+H]<sup>+</sup>: 260.1862, *found* 260.1873.

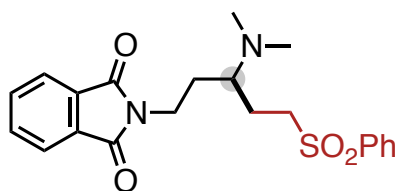**14**

**2-(3-(dimethylamino)-5-(phenylsulfonyl)pentyl)isoindoline-1,3-dione**: Following the general procedure A, the title compound was obtained in 82% yield after 8 h as colorless oil. <sup>1</sup>H NMR (400 MHz, CDCl<sub>3</sub>) δ 7.93-7.91 (m, 2H), 7.83-7.80 (m, 2H), 7.73-7.69 (m, 2H), 7.66-7.62 (m, 1H), 7.58-7.54 (m, 2H), 3.68-3.65 (m, 2H), 3.29-3.21 (m, 1H), 3.16-3.08 (m, 1H), 2.48 (br, 1H), 2.14 (s, 6H), 1.93-1.78 (m, 3H), 1.51-1.42 (m, 1H). <sup>13</sup>C NMR (101 MHz, CDCl<sub>3</sub>) δ 168.39, 139.52, 134.09, 133.74, 132.23, 129.41, 128.12, 123.35, 60.52, 53.98, 40.02, 36.07, 27.55, 22.89. IR (CDCl<sub>3</sub>, cm<sup>-1</sup>): 2937, 2826, 2780, 1770, 1707, 1397, 1146, 720. HRMS *calcd.* for (C<sub>21</sub>H<sub>25</sub>N<sub>2</sub>O<sub>4</sub>S) [M+H]<sup>+</sup>: 401.1535, *found* 401.1539.

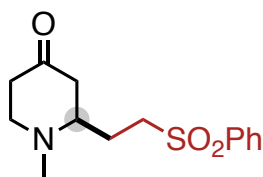**15**

**1-methyl-2-(2-(phenylsulfonyl)ethyl)piperidin-4-one**: Following the general procedure A, the title compound was obtained in 72% yield after 8 h as colorless oil. <sup>1</sup>H NMR (400 MHz, CDCl<sub>3</sub>) δ 7.91-7.89 (m, 2H), 7.68-7.64 (m, 1H), 7.59-7.55 (m, 2H), 3.24-3.12 (m, 2H), 3.09-3.03 (m, 1H), 2.69-2.57 (m, 2H), 2.48-2.15 (m, 8H), 2.01-1.92 (m, 1H), 1.89-1.80 (m, 1H). <sup>13</sup>C NMR (101 MHz, CDCl<sub>3</sub>) δ 207.80, 139.17, 133.95, 129.50, 128.08, 60.75, 53.57, 44.01, 39.91, 39.67, 25.50. IR (CDCl<sub>3</sub>, cm<sup>-1</sup>): 2956, 2795, 1714, 1446, 1303, 1085, 915, 730. HRMS *calcd.* for (C<sub>14</sub>H<sub>20</sub>NO<sub>3</sub>S) [M+H]<sup>+</sup>: 282.1164, *found* 282.1171.

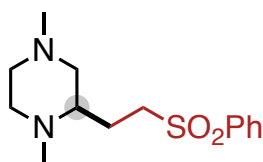

16

**1,4-dimethyl-2-(2-(phenylsulfonyl)ethyl)piperazine:** Following the general procedure A, the title compound was obtained in 73% yield after 8 h as colorless oil.  $^1\text{H}$  NMR (400 MHz,  $\text{CDCl}_3$ )  $\delta$  7.90 (d,  $J = 7.8$  Hz, 2H), 7.65 (t,  $J = 7.4$  Hz, 1H), 7.56 (t,  $J = 7.6$  Hz, 2H), 3.27-3.19 (m, 1H), 3.09-3.01 (m, 1H), 2.72-2.63 (m, 2H), 2.29 (td,  $J = 11.3, 2.8$  Hz, 1H), 2.21 (s, 3H), 2.12 (s, 3H), 2.08-1.94 (m, 2H), 1.86-1.76 (m, 2H).  $^{13}\text{C}$  NMR (126 MHz,  $\text{CDCl}_3$ )  $\delta$  139.18, 133.84, 129.43, 128.15, 59.92, 59.07, 55.40, 54.92, 51.81, 46.07, 42.10, 23.36. IR ( $\text{CDCl}_3$ ,  $\text{cm}^{-1}$ ): 3062, 2937, 2795, 2795, 1446, 1300, 1143, 734. HRMS *calcd.* for ( $\text{C}_{14}\text{H}_{23}\text{N}_2\text{O}_2\text{S}$ )  $[\text{M}+\text{H}]^+$ : 283.1480, *found* 283.1489.

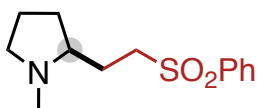

17

**1-methyl-2-(2-(phenylsulfonyl)ethyl)pyrrolidine:** Following the general procedure A, the title compound was obtained in 69% yield after 8 h as colorless oil.  $^1\text{H}$  NMR (400 MHz,  $\text{CDCl}_3$ )  $\delta$  7.91 (d,  $J = 8.0$  Hz, 2H), 7.65 (t,  $J = 7.9$  Hz, 1H), 7.56 (t,  $J = 7.7$  Hz, 2H), 3.23-3.15 (m, 1H), 3.10-3.02 (m, 2H), 2.25-2.15 (m, 5H), 2.08-2.00 (m, 1H), 1.92-1.83 (m, 1H), 1.79-1.65 (m, 3H), 1.42-1.33 (m, 1H).  $^{13}\text{C}$  NMR (126 MHz,  $\text{CDCl}_3$ )  $\delta$  139.18, 133.81, 129.42, 128.17, 64.15, 57.14, 52.87, 40.31, 29.85, 25.66, 22.06. IR ( $\text{CDCl}_3$ ,  $\text{cm}^{-1}$ ): 3062, 2945, 2781, 1446, 1303, 1086, 739, 689. HRMS *calcd.* for ( $\text{C}_{13}\text{H}_{20}\text{NO}_2\text{S}$ )  $[\text{M}+\text{H}]^+$ : 254.1215, *found* 254.1219.

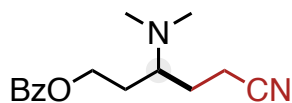

18

**5-cyano-3-(dimethylamino)pentyl benzoate:** Following the general procedure A, the title compound was obtained in 72% yield after 8 h as colorless oil.  $^1\text{H}$  NMR (500 MHz,  $\text{CDCl}_3$ )  $\delta$  8.03-8.02 (m, 2H), 7.57-7.54 (m, 1H), 7.46-7.42 (m, 2H), 4.40-4.32 (m, 2H), 2.73-2.67 (m, 1H), 2.45 (t,  $J = 7.3$  Hz, 13H), 2.24 (s, 6H), 2.09-2.02 (m, 1H), 1.80-1.74 (m, 2H), 1.59 (d,  $J = 34.9$  Hz, 1H).  $^{13}\text{C}$  NMR (126 MHz,  $\text{CDCl}_3$ )  $\delta$  166.58, 133.11, 130.21, 129.59, 128.52, 120.08, 62.98, 59.56, 40.03, 26.89, 26.83, 14.62. IR ( $\text{CDCl}_3$ ,  $\text{cm}^{-1}$ ): 2938, 2826, 2781, 2240, 1715, 1452, 1272, 713. HRMS *calcd.* for ( $\text{C}_{15}\text{H}_{21}\text{N}_2\text{O}_2$ )  $[\text{M}+\text{H}]^+$ : 261.1603, *found* 261.1610.



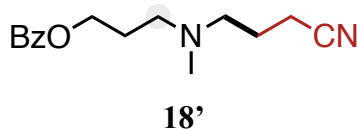

**3-((3-cyanopropyl)(methyl)amino)propyl benzoate:** Following the general procedure A, the title compound was obtained in 14% yield after 8 h as colorless oil.  $^1\text{H}$  NMR (500 MHz,  $\text{CDCl}_3$ )  $\delta$  8.04-8.03 (m, 2H), 7.58-7.54 (m, 1H), 7.46-7.43 (m, 2H), 4.38 (t,  $J = 6.5$  Hz, 2H), 2.49 (dt,  $J = 15.0, 6.8$  Hz, 4H), 2.41 (t,  $J = 7.1$  Hz, 2H), 2.22 (s, 3H), 1.93 (p,  $J = 6.7$  Hz, 2H), 1.80 (p,  $J = 6.9$  Hz, 2H).  $^{13}\text{C}$  NMR (126 MHz,  $\text{CDCl}_3$ )  $\delta$  166.72, 133.05, 130.45, 129.65, 128.52, 119.95, 63.22, 55.81, 54.36, 41.93, 26.81, 23.57, 14.85. IR ( $\text{CDCl}_3$ ,  $\text{cm}^{-1}$ ): 2955, 2801, 2246, 1716, 1452, 1274, 1115, 713. HRMS *calcd.* for ( $\text{C}_{15}\text{H}_{21}\text{N}_2\text{O}_2$ ) [ $\text{M}+\text{H}$ ] $^+$ : 261.1603, *found* 261.1600.

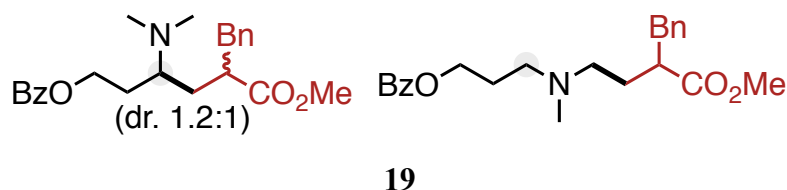

**5-benzyl-3-(dimethylamino)-6-methoxy-6-oxohexyl benzoate** (major): Following the general procedure A, the title compound was obtained in 81% yield after 8 h as a mixture of yellow oil. Selected peaks for:  $^1\text{H}$  NMR (500 MHz,  $\text{CDCl}_3$ )  $\delta$  8.05-8.08 (m, 2H), 7.57-7.60 (m, 1H), 7.45-7.48 (m, 2H), 7.28-7.31 (m, 2H), 7.17-7.23 (m, 3H), 4.30-4.41 (m, 2H).  $^{13}\text{C}$  NMR (126 MHz,  $\text{CDCl}_3$ )  $\delta$  176.02, 166.59, 139.25, 132.97, 130.45, 129.60, 128.97, 128.92, 128.45, 126.44, 63.19, 59.26, 51.32, 40.06. IR ( $\text{CDCl}_3$ ,  $\text{cm}^{-1}$ ): 2948, 2840, 1718, 1602, 1452, 1272, 1113, 712. HRMS *calcd.* for ( $\text{C}_{23}\text{H}_{30}\text{NO}_4$ ) [ $\text{M}+\text{H}$ ] $^+$ : 384.2175, *found* 384.2167.

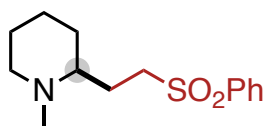

**1-methyl-2-(2-(phenylsulfonyl)ethyl)piperidine:** Following the general procedure A, the title compound was obtained in 86% yield after 4 h as colorless oil.  $^1\text{H}$  NMR (400 MHz,  $\text{CDCl}_3$ )  $\delta$  7.91 (d,  $J = 7.9$  Hz, 2H), 7.64 (t,  $J = 7.4$  Hz, 1H), 7.56 (t,  $J = 7.7$  Hz, 2H), 3.27-3.19 (m, 1H), 3.12-3.04 (m, 1H), 2.78 (d,  $J = 11.6$  Hz, 1H), 2.11 (s, 3H), 2.06-2.00 (m, 3H), 1.87-1.80 (m, 1H), 1.69-1.64 (m, 1H), 1.57-1.40 (m, 3H), 1.27-1.16 (m, 2H).  $^{13}\text{C}$  NMR (101 MHz,  $\text{CDCl}_3$ )  $\delta$  139.44, 133.75, 129.38, 128.14, 61.59, 57.05, 51.81, 42.74, 30.36, 25.63, 25.46, 24.33. IR ( $\text{CDCl}_3$ ,  $\text{cm}^{-1}$ ): 3062, 2928, 2854, 1446, 1304, 1284, 1086, 689. HRMS *calcd.* for ( $\text{C}_{14}\text{H}_{22}\text{NO}_2\text{S}$ ) [ $\text{M}+\text{H}$ ] $^+$ : 268.1371, *found* 268.1376.

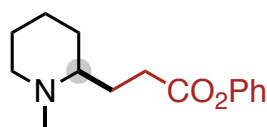

21

**phenyl 3-(1-methylpiperidin-2-yl)propanoate:** Following the general procedure A, the title compound was obtained in 76% yield after 8 h as colorless oil.  $^1\text{H}$  NMR (400 MHz,  $\text{CDCl}_3$ )  $\delta$  7.39-7.35 (m, 2H), 7.24-7.20 (m, 1H), 7.09-7.06 (2H), 3.07 (d,  $J = 10.2$  Hz, 1H), 2.79-2.71 (m, 1H), 2.65-2.39 (m, 6H), 2.19-2.12 (m, 1H), 2.06-1.97 (m, 1H), 1.87-1.68 (m, 4H), 1.62-1.51 (m, 1H), 1.41-1.35 (m, 1H).  $^{13}\text{C}$  NMR (101 MHz,  $\text{CDCl}_3$ )  $\delta$  172.05, 150.74, 129.58, 126.02, 121.61, 63.16, 56.72, 41.95, 29.98, 29.16, 26.81, 24.47, 23.46. IR ( $\text{CDCl}_3$ ,  $\text{cm}^{-1}$ ): 2935, 2855, 1756, 1592, 1491, 1194, 1136, 752. HRMS *calcd.* for ( $\text{C}_{15}\text{H}_{22}\text{NO}_2$ )  $[\text{M}+\text{H}]^+$ : 248.1651, *found* 248.1671.

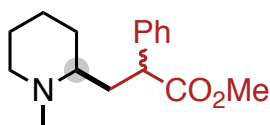

22 (~dr. 1.2:1)

**methyl 3-(1-methylpiperidin-2-yl)-2-phenylpropanoate:** Following the general procedure A, the title compound was obtained in 69% yield (~dr. 1.2:1) after 8 h as colorless oil.  $^1\text{H}$  NMR (400 MHz,  $\text{CDCl}_3$ )  $\delta$  7.33-7.23 (m, 5H), 3.74-3.62 (m, 4H), 2.98-2.95 (m, 0.53H), 2.91-2.88 (m, 0.43H), 2.65-1.60 (m, 11H), 1.47-1.20 (m, 2H).  $^{13}\text{C}$  NMR (101 MHz,  $\text{CDCl}_3$ )  $\delta$  (174.21, 174.15), (139.23, 138.25), (128.94, 128.90), 128.06, 127.79, (127.65, 127.54), (62.20, 61.43), (56.24, 55.96), (52.28, 52.25), (48.40, 47.90), (42.27, 41.92), (35.78, 34.65), (29.82, 29.34), (24.59, 24.39), (23.24, 23.03). IR ( $\text{CDCl}_3$ ,  $\text{cm}^{-1}$ ): 3028, 2934, 2855, 1731, 1452, 1203, 733, 699. HRMS *calcd.* for ( $\text{C}_{16}\text{H}_{24}\text{NO}_2$ )  $[\text{M}+\text{H}]^+$ : 262.1807, *found* 262.1825.

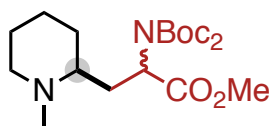

23 (~dr. 1.2:1)

**methyl 2-(bis(*tert*-butoxycarbonyl)amino)-3-(1-methylpiperidin-2-yl)propanoate:** Following the general procedure A, the title compound was obtained in 81% yield (~dr. 1.2:1) after 8 h as colorless oil.  $^1\text{H}$  NMR (400 MHz,  $\text{CDCl}_3$ )  $\delta$  4.96, 4.88 (m, 1H), 3.68 (two single, 3H), 2.92-2.83 (m, 1H), 2.72-2.03 (m, 6H), 1.85-1.20 (m, 25H).  $^{13}\text{C}$  NMR (101 MHz,  $\text{CDCl}_3$ )  $\delta$  171.53, (152.19, 151.99), (83.35, 83.34), (61.44, 60.90), (56.32, 56.25), (55.86, 55.60), (52.39, 52.32), (42.76, 42.37), (33.45, 31.83), (30.43, 30.31), 28.07, (25.22, 24.72), 23.37. IR ( $\text{CDCl}_3$ ,

cm<sup>-1</sup>): 2978, 2933, 1793, 1743, 1699, 1365, 994, 852. HRMS *calcd.* for (C<sub>20</sub>H<sub>37</sub>N<sub>2</sub>O<sub>6</sub>) [M+H]<sup>+</sup>: 401.2652, *found* 401.2665.

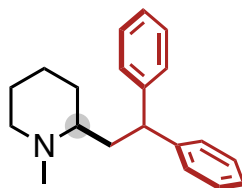

24

**2-(2,2-diphenylethyl)-1-methylpiperidine:** Following the general procedure B, 50 mol% of 2-*tert*-butyl-1,1,3,3-tetramethylguanidine (Barton's base) was used in Tol (0.1 M), the title compound was obtained in 74% yield after 8 h as yellow oil. <sup>1</sup>H NMR (400 MHz, CDCl<sub>3</sub>) δ 7.34-7.15 (m, 10H), 4.02 (dd, *J* = 10.9, 5.1 Hz, 1H), 3.19 (d, *J* = 11.9 Hz, 1H), 2.75-2.56 (m, 3H), 2.60 (s, 3H), 2.34-2.27 (m, 1H), 2.01-1.90 (m, 2H), 1.79-1.71 (m, 3H), 1.36-1.25 (m, 1H). <sup>13</sup>C NMR (101 MHz, CDCl<sub>3</sub>) δ 143.90, 142.19, 129.13, 128.81, 127.98, 127.59, 127.12, 126.78, 62.59, 55.29, 47.75, 40.25, 35.86, 27.49, 22.56, 21.78. IR (CDCl<sub>3</sub>, cm<sup>-1</sup>): 3057, 3025, 2935, 1451, 1439, 841, 751, 702. HRMS *calcd.* for (C<sub>20</sub>H<sub>26</sub>N) [M+H]<sup>+</sup>: 280.2065, *found* 280.2086.

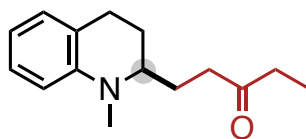

25

**1-(1-methyl-1,2,3,4-tetrahydroquinolin-2-yl)pentan-3-one:** Following the general procedure A, the title compound was obtained in 46% yield after 8 h as colorless oil. <sup>1</sup>H NMR (400 MHz, CDCl<sub>3</sub>) δ 7.09 (t, *J* = 7.6 Hz, 1H), 6.97 (d, *J* = 7.2 Hz, 1H), 6.60 (t, *J* = 7.3 Hz, 1H), 6.55 (d, *J* = 8.1 Hz, 1H), 3.26 (dq, *J* = 8.6, 4.4 Hz, 1H), 2.95 (s, 3H), 2.84-2.75 (m, 1H), 2.71-2.64 (m, 1H), 2.44 (q, *J* = 7.3 Hz, 3H), 1.99-1.80 (m, 3H), 1.73-1.63 (m, 1H), 1.07 (t, *J* = 7.3 Hz, 2H). <sup>13</sup>C NMR (101 MHz, CDCl<sub>3</sub>) δ 211.18, 145.41, 128.77, 127.28, 121.96, 115.74, 111.02, 58.18, 38.67, 38.28, 36.09, 25.73, 24.64, 23.77, 7.99. IR (CDCl<sub>3</sub>, cm<sup>-1</sup>): 3019, 2935, 1712, 1454, 1500, 1337, 1215, 745. HRMS *calcd.* for (C<sub>15</sub>H<sub>22</sub>NO) [M+H]<sup>+</sup>: 232.1701, *found* 232.1707.

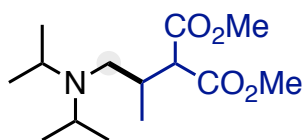

26

**dimethyl 2-(1-(diisopropylamino)propan-2-yl)malonate:** Following the general procedure A, the title compound was obtained in 73% yield after 8 h as colorless oil. <sup>1</sup>H NMR (400 MHz, CDCl<sub>3</sub>) δ 4.19-4.13 (m, 4H), 3.49 (d, *J* = 5.8 Hz, 1H), 2.96 (hept, *J* = 6.7 Hz, 2H), 2.43-2.36

(m, 1H), 2.33-2.24 (m, 2H), 1.24 (t,  $J = 7.1$  Hz, 7H), 0.97 (d,  $J = 6.5$  Hz, 3H), 0.94 (d,  $J = 6.7$  Hz, 15H).  $^{13}\text{C}$  NMR (101 MHz,  $\text{CDCl}_3$ )  $\delta$  169.97, 169.20, 61.10, 60.93, 54.39, 49.16, 47.43, 32.82, 21.02, 20.64, 15.14, 14.22. IR ( $\text{CDCl}_3$ ,  $\text{cm}^{-1}$ ): 2965, 2934, 1728, 1462, 1365, 1228, 1152, 1030. HRMS *calcd.* for ( $\text{C}_{14}\text{H}_{28}\text{NO}_4$ )  $[\text{M}+\text{H}]^+$ : 274.2018, *found* 274.2022.

**General Procedure B for amino alkylation of diary styrene:** A 8.0 mL disposable borosilicate glass tube with screw cap containing a stirring bar was charged with TPS-SH (5 mol%, 2.9 mg, 0.01 mmol),  $\text{Ir}(\text{ppy})_2(\text{dtbbpy})\text{PF}_6$  (1 mol%, 1.8 mg, 0.002 mmol), trialkylamine (0.6 mmol, added after solvent if volatile liquid) and diary styrene (0.2 mmol, added after solvent if liquid). The tube was transferred to a nitrogen-filled glove-box where the dry 1,4-Dioxane (2.0 mL, 0.1 M) was added. Then the reaction was stirred for 1 minute and transferred outside, placing ~10 cm away from a 34 W Blue-Leds and rigorously stirred for 8h with cooling by fan. After completion of the reaction, the product was directly purified by flash column chromatography in silica gel with  $\text{CHCl}_3/\text{MeOH}$ .

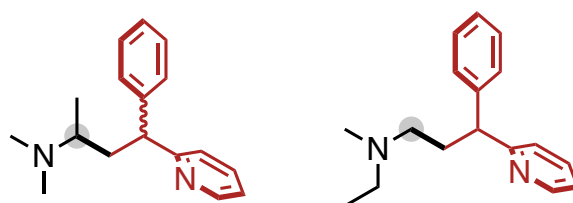

**27** (2.6:1)

***N,N*-dimethyl-4-phenyl-4-(pyridin-2-yl)butan-2-amine** (major): Following the general procedure B, the title compound was obtained in 91% as a mixture of yellow oil.  $^1\text{H}$  NMR (400 MHz,  $\text{CDCl}_3$ )  $\delta$  8.57-8.55 (m, 1H), 7.56-7.51 (m, 1H), 7.39-7.34 (m, 2H), 7.30-7.25 (m, 2H), 7.20-7.15 (m, 2H), 7.08-7.04 (m, 1H), 4.30-4.23 (m, 0.73H), 4.15-4.11 (m, 0.28H), 2.51-1.92 (m, 9H), 1.00-0.94 (m, 3H). Selected peaks:  $^{13}\text{C}$  NMR (101 MHz,  $\text{CDCl}_3$ )  $\delta$  149.20, 136.34, 128.56, 128.48, 128.20, 126.05, 123.55, 120.99, 49.42, 27.04, 26.11, 25.55, 21.31, 21.01. IR ( $\text{CDCl}_3$ ,  $\text{cm}^{-1}$ ): 3060, 2962, 1587, 1469, 1431, 1047, 747, 699. HRMS *calcd.* for ( $\text{C}_{17}\text{H}_{23}\text{N}_2$ )  $[\text{M}+\text{H}]^+$ : 255.1861, *found* 255.1857.

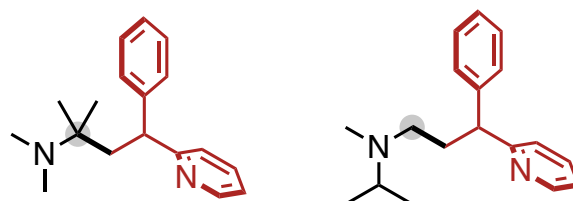

**28** (1.3:1)

***N,N*,2-trimethyl-4-phenyl-4-(pyridin-2-yl)butan-2-amine** (major): Following the general procedure B, the title compound was obtained in 88% as a mixture of yellow oil. Selected peaks for  $^1\text{H}$  NMR (400 MHz,  $\text{CDCl}_3$ )  $\delta$  8.5-8.53 (m, 2.3H), 4.40 (m, 1.3H), 4.16 (t,  $J = 7.5$  Hz,

1H), 0.92 (d,  $J = 6.6$  Hz, 6H), 0.87 (s, 3.9H), 0.86 (s, 3.9H).  $^{13}\text{C}$  NMR (101 MHz,  $\text{CDCl}_3$ )  $\delta$  164.88, 163.88, 149.27, 149.15, 146.16, 143.86, 136.43, 136.40, 135.20, 129.77, 128.54, 128.50, 128.47, 128.14, 128.08, 127.81, 126.45, 126.12, 123.50, 122.88, 121.31, 121.07, 56.91, 53.46, 51.55, 51.44, 48.87, 43.85, 38.54, 36.90, 32.99, 24.10, 22.67, 18.08, 17.75. IR ( $\text{CDCl}_3$ ,  $\text{cm}^{-1}$ ): 3061, 3025, 2973, 1469, 1430, 1047, 747, 700. HRMS *calcd.* for ( $\text{C}_{18}\text{H}_{25}\text{N}_2$ )  $[\text{M}+\text{H}]^+$ : 269.2018, *found* 269.2029.

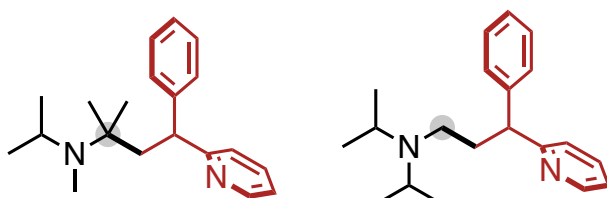

**29** (2:1)

***N*-isopropyl-*N*,2-dimethyl-4-phenyl-4-(pyridin-2-yl)butan-2-amine** (major): Following the general procedure B, the title compound was obtained in 68% as a mixture of yellow oil.  $^1\text{H}$  NMR (400 MHz,  $\text{CDCl}_3$ )  $\delta$  8.56-8.54 (m, 1.5H), 7.56-7.00 (m, 12H), 4.40-4.37 (m, 1H), 4.16-4.12 (m, 0.5H), 3.27-3.21 (m, 1H), 3.03-3.00 (m, 1H), 2.75-2.70 (m, 1H), 2.49-2.41 (m, 1.5H), 2.19-2.13 (m, 1.5H), 2.08 (s, 3H), 1.01-0.88 (m, 18H). Selected peaks:  $^{13}\text{C}$  NMR (101 MHz,  $\text{CDCl}_3$ )  $\delta$  149.20, 136.34, 128.56, 128.48, 128.20, 126.05, 123.55, 120.99, 49.42, 27.04, 26.11, 25.55, 21.31, 21.01. IR ( $\text{CDCl}_3$ ,  $\text{cm}^{-1}$ ): 3024, 2966, 2872, 1587, 1469, 1431, 746, 699. HRMS *calcd.* for ( $\text{C}_{20}\text{H}_{29}\text{N}_2$ )  $[\text{M}+\text{H}]^+$ : 297.2331, *found* 297.2333.

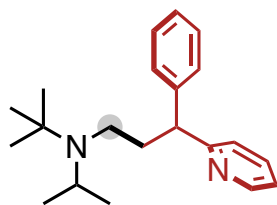

**30**

***N*-(*tert*-butyl)-*N*-isopropyl-3-phenyl-3-(pyridin-2-yl)propan-1-amine**: Following the general procedure B, the title compound was obtained in 95% as yellow oil.  $^1\text{H}$  NMR (400 MHz,  $\text{CDCl}_3$ )  $\delta$  8.55-8.53 (m, 1H), 7.56-7.52 (m, 1H), 7.38-7.35 (m, 2H), 7.30-7.28 (m, 2H), 7.20-7.15 (m, 2H), 7.07-7.04 (m, 1H), 4.06 (t,  $J = 7.4$  Hz, 1H), 3.34 (br, 1H), 2.46 (br, 3H), 2.23 (br, 1H), 1.05 (s, 9H), 0.95 (s, 6H). Selected peaks for  $^{13}\text{C}$  NMR (101 MHz,  $\text{CDCl}_3$ )  $\delta$  149.21, 136.43, 128.50, 128.09, 126.39, 122.57, 121.27, 52.45, 47.15, 41.20, 40.14, 28.93, 22.44. IR ( $\text{CDCl}_3$ ,  $\text{cm}^{-1}$ ): 3024, 2968, 2870, 1470, 1387, 1111, 745, 698. HRMS *calcd.* for ( $\text{C}_{21}\text{H}_{31}\text{N}_2$ )  $[\text{M}+\text{H}]^+$ : 311.2487, *found* 311.2488.

*Note: rotamers were observed in NMR.*

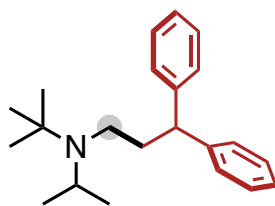

31

***N*-(*tert*-butyl)-*N*-isopropyl-3,3-diphenylpropan-1-amine:** Following the general procedure B, the title compound was obtained in 86% as yellow oil.  $^1\text{H}$  NMR (400 MHz,  $\text{CDCl}_3$ )  $\delta$  7.28-7.27 (m, 8H), 7.18-7.17 (m, 2H), 3.87 (t,  $J = 7.7$  Hz, 1H), 3.35-3.29 (m, 1H), 2.44-2.40 (m, 2H), 2.21-2.15 (2H), 1.03 (s, 9H), 0.93 (d,  $J = 6.4$  Hz, 6H).  $^{13}\text{C}$  NMR (101 MHz,  $\text{CDCl}_3$ )  $\delta$  145.47, 128.49, 127.99, 126.12, 55.43, 50.16, 46.97, 41.34, 41.09, 29.13, 22.61. IR ( $\text{CDCl}_3$ ,  $\text{cm}^{-1}$ ): 3060, 3025, 2935, 1450, 1441, 847, 749, 701. HRMS *calcd.* for ( $\text{C}_{22}\text{H}_{32}\text{N}$ )  $[\text{M}+\text{H}]^+$ : 310.2535, *found* 310.2542.

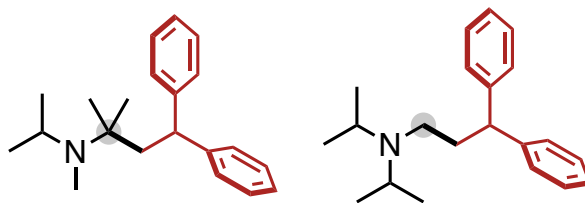

32 (1.8:1)

***N*-isopropyl-*N*,2-dimethyl-4,4-diphenylbutan-2-amine:** Following the general procedure B, the title compound was obtained in 84% as a mixture of yellow oil. Selected peaks for  $^1\text{H}$  NMR (400 MHz,  $\text{CDCl}_3$ )  $\delta$  4.20 (t,  $J = 6.3$  Hz, 1.78H), 3.92 (t,  $J = 7.6$  Hz, 1H).  $^{13}\text{C}$  NMR (101 MHz,  $\text{CDCl}_3$ )  $\delta$  128.74, 128.67, 127.84, 126.64, 126.17, 49.38, 47.40, 27.64, 24.96, 20.58, 18.86. IR ( $\text{CDCl}_3$ ,  $\text{cm}^{-1}$ ): 3025, 2964, 2935, 1491, 1444, 841, 749, 701. HRMS *calcd.* for ( $\text{C}_{21}\text{H}_{30}\text{N}$ )  $[\text{M}+\text{H}]^+$ : 296.2378, *found* 296.2386.

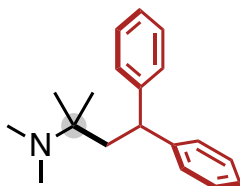

33

***N,N*,2-trimethyl-4,4-diphenylbutan-2-amine:** Following the general procedure B, the title compound was obtained in 49% as a yellow oil.  $^1\text{H}$  NMR (400 MHz,  $\text{CDCl}_3$ )  $\delta$  7.36-7.34 (m, 4H), 7.28-7.24 (m, 4H), 7.16-7.12 (m, 2H), 4.25 (t,  $J = 6.2$  Hz, 1H), 2.33 (d,  $J = 6.2$  Hz, 2H), 2.27 (s, 6H), 0.93 (s, 6H).  $^{13}\text{C}$  NMR (101 MHz,  $\text{CDCl}_3$ )  $\delta$  146.88, 128.59, 127.91, 126.01, 47.05, 44.30, 38.49, 23.62. IR ( $\text{CDCl}_3$ ,  $\text{cm}^{-1}$ ): 3026, 2975, 2940, 1492, 1261, 1130, 749, 696. HRMS *calcd.* for ( $\text{C}_{19}\text{H}_{26}\text{N}$ )  $[\text{M}+\text{H}]^+$ : 268.2065, *found* 268.2070.

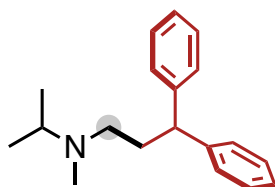

33'

***N*-isopropyl-*N*-methyl-3,3-diphenylpropan-1-amine:** Following the general procedure B, the title compound was obtained in 18% as a yellow oil.  $^1\text{H}$  NMR (400 MHz,  $\text{CDCl}_3$ )  $\delta$  7.29-7.25 (m, 8H), 7.19-7.14 (m, 2H), 4.01-3.97 (m, 1H), 3.13-3.06 (m, 1H), 2.58-2.54 (m, 2H), 2.45-2.42 (m, 2H), 2.37 (s, 3H), 1.08 (d,  $J = 6.6$  Hz, 6H).  $^{13}\text{C}$  NMR (101 MHz,  $\text{CDCl}_3$ )  $\delta$  144.04, 128.70, 127.83, 126.53, 54.73, 51.97, 49.07, 36.18, 31.98, 17.26. IR ( $\text{CDCl}_3$ ,  $\text{cm}^{-1}$ ): 3026, 2963, 1492, 1451, 1154, 841, 752, 699. HRMS *calcd.* for ( $\text{C}_{19}\text{H}_{26}\text{N}$ )  $[\text{M}+\text{H}]^+$ : 268.2065, *found* 268.2065.

**General Procedure C for trialkylamine-containing pharmaceuticals:** A 8.0 mL disposable borosilicate glass tube with screw cap containing a stirring bar was charged with TPS-SH (20 mol%, 5.8 mg, 0.02 mmol),  $\text{Ir}(\text{ppy})_2(\text{dtbbpy})\text{PF}_6$  (1 mol%, 0.9 mg, 0.001 mmol), pharmaceutical (0.3 mmol) and olefin (0.1 mmol, added after solvent if liquid). The tube was transferred to a nitrogen-filled glove-box where the dry Tol (1.0 mL, 0.1 M) was added. Then the reaction was stirred for 1 minute and transferred outside, placing ~10 cm away from a 34 W Blue-Leds and rigorously stirred for 8 h with cooling by fan. After completion of the reaction, the product was directly purified by flash column chromatography in silica gel with  $\text{CHCl}_3/\text{MeOH}$ .

*Note: in case of solubility issue of the drug molecules in Tol, DMA or DMSO (1 mL) could be used as cosolvent.*

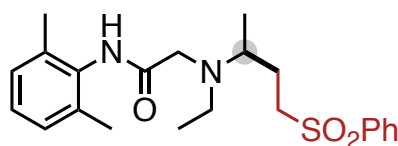

34

***N*-(2,6-dimethylphenyl)-2-(ethyl(4-(phenylsulfonyl)butan-2-yl)amino)acetamide:**

Following the general procedure C, the title compound was obtained in 65% yield after 8 h as colorless oil.  $^1\text{H}$  NMR (400 MHz,  $\text{CDCl}_3$ )  $\delta$  8.55 (s, 1H), 7.87 (d,  $J = 7.9$  Hz, 2H), 7.66 (t,  $J = 7.4$  Hz, 1H), 7.55 (t,  $J = 7.7$  Hz, 2H), 7.13-7.06 (m, 3H), 3.24-3.10 (m, 4H), 3.00-2.95 (m, 1H), 2.65-2.59 (m, 2H), 2.19 (s, 6H), 2.04-1.94 (m, 1H), 1.81-1.72 (m, 1H), 1.14 (t,  $J = 7.1$  Hz, 1H), 1.05 (d,  $J = 6.5$  Hz, 1H).  $^{13}\text{C}$  NMR (101 MHz,  $\text{CDCl}_3$ )  $\delta$  170.06, 139.06, 135.22, 134.02, 133.76, 129.55, 128.44, 128.04, 127.44, 54.89, 54.28, 54.04, 45.89, 26.76, 18.76, 14.92, 14.25. IR

(CDCl<sub>3</sub>, cm<sup>-1</sup>): 3300, 3062, 2967, 1671, 1491, 1303, 1086, 731. HRMS *calcd.* for (C<sub>22</sub>H<sub>31</sub>N<sub>2</sub>O<sub>3</sub>S) [M+H]<sup>+</sup>: 403.2055, *found* 403.2068.

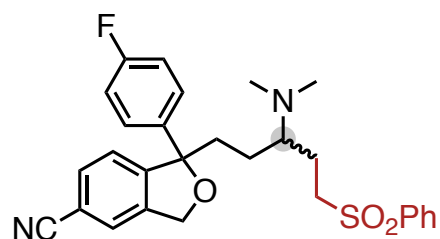

**35** (~ dr. 1:1)

**1-(3-(dimethylamino)-5-(phenylsulfonyl)pentyl)-1-(4-fluorophenyl)-1,3-**

**dihydroisobenzofuran-5-carbonitrile:** Following the general procedure C, the title compound was obtained in 55% yield (~ dr. 1:1) after 8 h as colorless oil. <sup>1</sup>H NMR (400 MHz, CDCl<sub>3</sub>) δ 7.89 (d, *J* = 7.7 Hz, 1H), 7.66-7.54 (m, 4H), 7.50 (s, 1H), 7.41-7.36 (m, 3H), 7.01 (t, *J* = 8.6 Hz, 1H), 5.19-5.10 (m, 2H), 3.20-2.99 (m, 2H), 2.35 (br, 1H), 2.22-2.05 (m, 2H), 2.05 (s, 6H), 1.81-1.71 (m, 2H), 1.52-1.33 (m, 1H), 1.18-1.00 (m, 1H). <sup>13</sup>C NMR (101 MHz, CDCl<sub>3</sub>) δ 163.45, 161.00, 149.50, 149.46, 140.40, 140.26, 139.69, 139.67, 139.33, 133.76, 132.10, 132.05, 129.41, 128.04, 128.03, 126.87, 126.84, 126.79, 126.77, 125.42, 122.80, 122.77, 118.69, 115.69, 115.48, 112.04, 91.21, 91.21, 71.36, 71.33, 62.76, 62.70, 54.05, 40.13, 40.11, 38.60, 22.79, 22.71, 22.65. <sup>19</sup>F NMR (376 MHz, CDCl<sub>3</sub>) δ -115.12. IR (CDCl<sub>3</sub>, cm<sup>-1</sup>): 3064, 2937, 2826, 2228, 1506, 1303, 1032, 732. HRMS *calcd.* for (C<sub>28</sub>H<sub>30</sub>N<sub>2</sub>O<sub>3</sub>FS) [M+H]<sup>+</sup>: 493.1961, *found* 493.1969.

*Note: less than 10% of minor isomer (impure) was observed.*

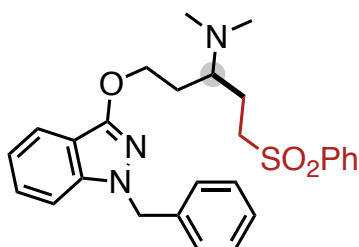

**36**

**1-((1-benzyl-1H-indazol-3-yl)oxy)-N,N-dimethyl-5-(phenylsulfonyl)pentan-3-amine:**

Following the general procedure C, the title compound was obtained in 63% yield after 8 h as colorless oil. <sup>1</sup>H NMR (400 MHz, CDCl<sub>3</sub>) δ 7.90-7.88 (m, 2H), 7.61-7.56 (m, 2H), 7.50-7.46 (m, 2H), 7.33-7.23 (m, 4H), 7.19-7.16 (m, 3H), 7.03 (t, *J* = 7.8 Hz, 1H), 5.38 (s, 2H), 4.37 (tt, *J* = 10.4, 5.3 Hz, 2H), 3.39-3.32 (m, 1H), 3.19-3.12 (m, 1H), 2.68 (br, 1H), 2.17 (s, 6H), 2.15-2.08 (m, 1H), 1.98-1.86 (m, 2H), 1.62 (dq, *J* = 14.1, 6.4 Hz, 1H). <sup>13</sup>C NMR (101 MHz, CDCl<sub>3</sub>) δ 155.82, 141.71, 139.59, 137.57, 133.61, 129.32, 128.71, 128.09, 127.64, 127.54, 127.16,



120.10, 119.32, 113.14, 108.99, 66.95, 59.79, 53.98, 52.48, 40.05, 27.54, 24.13. IR (CDCl<sub>3</sub>, cm<sup>-1</sup>): 3061, 2937, 2780, 1528, 1444, 1303, 1086, 742. HRMS *calcd.* for (C<sub>27</sub>H<sub>32</sub>N<sub>3</sub>O<sub>3</sub>S) [M+H]<sup>+</sup>: 478.2164, *found* 478.2166.

*Note: less than 10% of minor isomer (impure) was observed.*

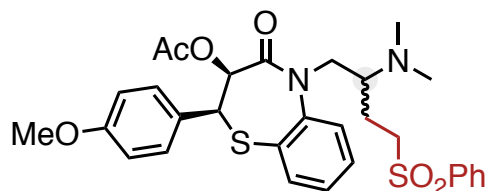

**37** (~dr. 1.2:1)

**(2R,3S)-5-(2-(dimethylamino)-4-(phenylsulfonyl)butyl)-2-(4-methoxyphenyl)-4-oxo-2,3,4,5-tetrahydrobenzo[b][1,4]thiazepin-3-yl acetate:** Following the general procedure C, the title compound was obtained in 76% yield (~dr. 1.2:1) after 8 h as colorless oil. <sup>1</sup>H NMR (400 MHz, CDCl<sub>3</sub>) δ 7.88 (d, *J* = 7.8 Hz, 1H), 7.75 (d, *J* = 7.6 Hz, 1H), 7.71-7.56 (m, 2H), 7.56-7.24 (m, 7H), 6.94 (d, *J* = 8.6 Hz, 1H), 6.87 (d, *J* = 8.6 Hz, 1H), [5.13 (d, *J* = 7.7 Hz, 0.55H), 5.08 (d, *J* = 7.5 Hz, 0.45H)], [4.99 (d, *J* = 7.8 Hz, 0.55H), 4.96 (d, *J* = 7.5 Hz, 0.45H)], 4.47-4.41 (m, 1H), [3.83 (s, 1.58H), 3.81 (s, 1.29H)], 3.60-2.96 (m, 4H), 2.52-2.19 (m, 4H), 2.06-2.04 (m, 4H), 1.88-1.87 (m, 3H), 1.75-1.43 (m, 1H). Major isomer: <sup>13</sup>C NMR (126 MHz, CDCl<sub>3</sub>) δ 170.03, 159.96, 139.21, 135.95, 133.58, 131.43, 130.91, 129.37, 128.98, 128.31, 128.13, 127.46, 126.45, 124.85, 123.68, 114.07, 71.32, 60.89, 55.41, 54.63, 53.74, 46.18, 39.98, 22.37, 20.60. IR (CDCl<sub>3</sub>, cm<sup>-1</sup>): 3063, 2937, 2833, 1744, 1676, 1511, 1147, 731. HRMS *calcd.* for (C<sub>30</sub>H<sub>35</sub>N<sub>2</sub>O<sub>6</sub>S<sub>2</sub>) [M+H]<sup>+</sup>: 583.1937, *found* 583.1946.

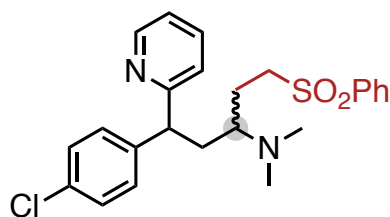

**38** (~dr. 1:1)

**1-(4-chlorophenyl)-N,N-dimethyl-5-(phenylsulfonyl)-1-(pyridin-2-yl)pentan-3-amine:** Following the general procedure C, the title compound was obtained in 59% yield (~dr. 1:1) after 8 h as colorless oil. <sup>1</sup>H NMR (400 MHz, CDCl<sub>3</sub>) δ 8.58-8.54 (m, 1H), 7.90-7.87 (m, 2H), 7.66 (t, *J* = 7.4 Hz, 1H), 7.56 (t, *J* = 7.7 Hz, 3H), 7.28-7.23 (m, 4H), 7.13-7.09 (m, 2H), 4.16-4.09 (m, 1H), 3.23-3.02 (m, 2H), 2.51-2.18 (m, 2H), 2.12 (s, 3H), 2.10 (s, 3H), 1.93-1.76 (m, 3H). <sup>13</sup>C NMR (101 MHz, CDCl<sub>3</sub>) δ (162.79, 162.64), (149.53, 149.49), (142.42, 141.88), (139.64, 139.57), 136.62, (133.68, 133.63), (132.49, 132.40), (129.48, 129.45), (129.35, 129.33), (128.81, 128.75), 128.06, 123.42, 121.69, (60.12, 59.95), (54.14, 54.02), (49.66,

49.46), 39.88, (34.49, 33.74), (22.57, 22.39). IR (CDCl<sub>3</sub>, cm<sup>-1</sup>): 3063, 2934, 2824, 1587, 1470, 1302, 1086, 731. HRMS *calcd.* for (C<sub>24</sub>H<sub>28</sub>N<sub>2</sub>O<sub>2</sub>SO<sub>2</sub>) [M+H]<sup>+</sup>: 443.1560, *found* 443.1560.

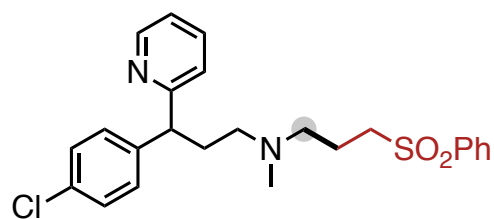

**38'**

**3-(4-chlorophenyl)-N-methyl-N-(3-(phenylsulfonyl)propyl)-3-(pyridin-2-yl)propan-1-amine:** Following the general procedure C, the title compound was obtained in 16% yield after 8 h as colorless oil. <sup>1</sup>H NMR (400 MHz, CDCl<sub>3</sub>) δ 8.57 (d, *J* = 4.3 Hz, 1H), 7.92 (d, *J* = 7.6 Hz, 2H), 7.67 (t, *J* = 7.4 Hz, 1H), 7.60-7.55 (m, 3H), 7.28-7.24 (m, 4H), 7.13-7.10 (m, 2H), 4.08 (t, *J* = 7.5 Hz, 1H), 3.16-3.12 (m, 2H), 2.45-2.36 (m, 3H), 2.29-2.21 (m, 2H), 2.17-2.09 (m, 4H), 1.88-1.79 (m, 2H). <sup>13</sup>C NMR (101 MHz, CDCl<sub>3</sub>) δ 163.01, 149.55, 142.20, 139.43, 136.67, 133.76, 132.40, 129.49, 129.41, 128.78, 128.16, 123.01, 121.67, 55.61, 54.26, 50.54, 41.64, 32.44, 20.70. IR (CDCl<sub>3</sub>, cm<sup>-1</sup>): 3062, 2949, 2797, 1587, 1305, 1087, 822, 750. HRMS *calcd.* for (C<sub>24</sub>H<sub>28</sub>N<sub>2</sub>O<sub>2</sub>SO<sub>2</sub>) [M+H]<sup>+</sup>: 443.1560, *found* 443.1562.

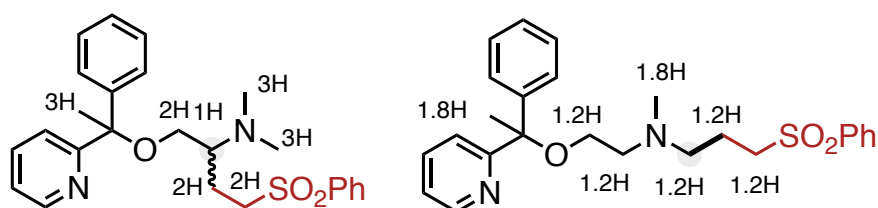

**39** (~dr. 1:1, ~rr. 1.7:1)

Following the general procedure C, the title compound was obtained in 73% yield as a yellow oil mixture after 8h. <sup>1</sup>H NMR (400 MHz, CDCl<sub>3</sub>) δ 8.52-7.08 (m, 22.4H), 3.41-3.16 (m, 6.4H), 2.69-2.64 (m, 1H), 2.60 (t, *J* = 5.9 Hz, 1.2H), 2.48 (t, *J* = 6.6 Hz, 1.2H), 2.23 (s, 3H), 2.22 (3H), 2.18 (s, 1.8H), 2.01-1.85 (m, 8H). Selected peaks: <sup>13</sup>C NMR (101 MHz, CDCl<sub>3</sub>) δ 165.05, 148.54, 136.52, 133.62, 129.32, 128.16, 126.45, 121.86, 121.02, 82.41, 62.28, 57.39, 54.22, 41.22, 24.06, 20.85. IR (CDCl<sub>3</sub>, cm<sup>-1</sup>): 3058, 2934, 2783, 1446, 1303, 1085, 789, 748. HRMS *calcd.* for (C<sub>25</sub>H<sub>31</sub>N<sub>2</sub>O<sub>3</sub>S) [M+H]<sup>+</sup>: 439.2055, *found* 439.2057.

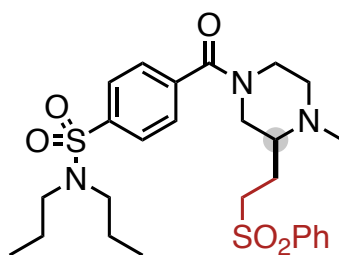

**40**  
78

**4-(4-methyl-3-(2-(phenylsulfonyl)ethyl)piperazine-1-carbonyl)-N,N-**

**dipropylbenzenesulfonamide:** Following the general procedure C, the title compound was obtained in 77% yield after 8 h as colorless oil.  $^1\text{H}$  NMR (400 MHz,  $\text{CDCl}_3$ )  $\delta$  7.95-7.78 (m, 4H), 7.68-7.64 (m, 1H), 7.59-7.55 (m, 2H), 7.50-7.42 (br, 2H), 4.36-4.11 (br, 1H), 3.42-2.61 (m, 10 H), 2.40-2.15 (m, 5 H), 2.05-1.73 (br, 2H), 1.55 (h,  $J = 7.4$  Hz, 4H), 0.86 (t,  $J = 7.4$  Hz, 6H).  $^{13}\text{C}$  NMR (101 MHz,  $\text{CDCl}_3$ )  $\delta$  168.77, 141.67, 139.18, 139.08, 134.00, 129.55, 128.08, 127.73, 127.49, 59.48, 54.22, 51.69, 50.24, 47.16, 44.91, 41.99, 22.19, 21.80, 11.26. IR ( $\text{CDCl}_3$ ,  $\text{cm}^{-1}$ ): 3064, 2965, 1630, 1443, 1147, 1086, 913, 726. HRMS *calcd.* for ( $\text{C}_{26}\text{H}_{38}\text{N}_3\text{O}_5\text{S}_2$ )  $[\text{M}+\text{H}]^+$ : 536.2253, *found* 536.2262.

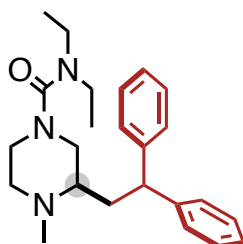

41

**3-(2,2-diphenylethyl)-N,N-diethyl-4-methylpiperazine-1-carboxamide:** Following the general procedure C, 5 mol% of TPS-SH and 50 mol% of 2-*tert*-butyl-1,1,3,3-tetramethylguanidine (Barton's base) was used instead of 10 mol% of TPS-SH, the title compound was obtained in 45% yield after 8 h as colorless oil.  $^1\text{H}$  NMR (400 MHz,  $\text{CDCl}_3$ )  $\delta$  7.31-7.14(m, 10H), 4.02 (dd,  $J = 10.0, 5.7$  Hz, 1H), 3.44-3.35 (m, 2H), 3.14-3.00 (m, 5H), 2.82-2.73 (m, 2H), 2.52 (ddd,  $J = 13.5, 10.1, 2.9$  Hz, 1H), 2.30 (s, 3H), 2.24 (td,  $J = 11.5, 3.1$  Hz, 1H), 2.07-2.03 (m, 1H), 1.95 (ddd,  $J = 14.1, 8.4, 5.7$  Hz, 1H), 1.05 (t,  $J = 7.1$  Hz, 6H).  $^{13}\text{C}$  NMR (101 MHz,  $\text{CDCl}_3$ )  $\delta$  164.40, (145.26, 143.86), (128.76, 128.68), (128.11, 127.78), (126.61, 126.41), 60.24, 54.44, 51.32, 48.45, 46.40, 42.52, 41.86, 35.55, 13.35. IR ( $\text{CDCl}_3$ ,  $\text{cm}^{-1}$ ): 3065, 2968, 2794, 1640, 1451, 1416, 1261, 701. HRMS *calcd.* for ( $\text{C}_{24}\text{H}_{34}\text{N}_3\text{O}$ )  $[\text{M}+\text{H}]^+$ : 380.2702, *found* 380.2710.

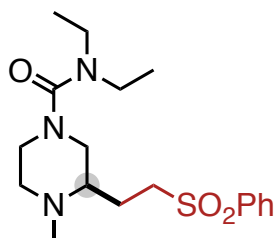

42

**N,N-diethyl-4-methyl-3-(2-(phenylsulfonyl)ethyl)piperazine-1-carboxamide:** Following the general procedure C, the title compound was obtained in 82% yield after 8 h as colorless

oil.  $^1\text{H}$  NMR (400 MHz,  $\text{CDCl}_3$ )  $\delta$  7.90 (d,  $J = 8.0$  Hz, 2H), 7.65 (t,  $J = 6.9$  Hz, 1H), 7.56 (t,  $J = 7.7$  Hz, 2H), 3.37-3.23 (m, 3H), 3.16 (q,  $J = 7.1$  Hz, 4H), 3.11-3.02 (m, 1H), 2.93 (t,  $J = 11.6$  Hz, 1H), 2.71 (d,  $J = 11.7$  Hz, 1H), 2.61 (t,  $J = 11.3$  Hz, 1H), 2.39-2.24 (m, 2H), 2.19 (s, 3H), 2.05-1.87 (m, 2H), 1.08 (t,  $J = 7.1$  Hz, 6H).  $^{13}\text{C}$  NMR (101 MHz,  $\text{CDCl}_3$ )  $\delta$  164.31, 139.21, 133.89, 129.46, 128.12, 59.71, 54.73, 51.79, 49.86, 47.22, 42.23, 41.87, 22.63, 13.29. IR ( $\text{CDCl}_3$ ,  $\text{cm}^{-1}$ ): 3062, 2969, 2797, 1634, 1419, 1262, 1086, 735. HRMS *calcd.* for ( $\text{C}_{18}\text{H}_{30}\text{N}_3\text{O}_3\text{S}$ )  $[\text{M}+\text{H}]^+$ : 368.2008, *found* 368.2030.

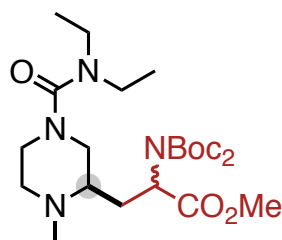

43

**methyl 2-(bis(*tert*-butoxycarbonyl)amino)-3-(4-(diethylcarbamoyl)-1-methylpiperazin-2-yl)propanoate:** Following the general procedure C, the title compound was obtained in 73% yield (~dr. 1.4:1) after 8 h as colorless oil.  $^1\text{H}$  NMR (400 MHz,  $\text{CDCl}_3$ )  $\delta$  5.00-4.96 (m, 1H), 3.70 (s, 3H), 3.45-2.57 (m, 10H), 2.34-2.15 (m, 6H), 1.48 (s, 18H), 1.10 (t,  $J = 7.1$  Hz, 3H), 1.09 (t,  $J = 7.1$  Hz, 3H).  $^{13}\text{C}$  NMR (101 MHz,  $\text{CDCl}_3$ )  $\delta$  (171.46, 171.35), 164.49, (152.24, 152.11), (83.42, 83.35), (59.78, 59.36), (55.87, 55.80), (54.74, 53.97), 52.42, (51.42, 51.07), (46.55, 46.27), (42.67, 42.42), 41.91, (31.95, 29.19), 28.13, 13.31. IR ( $\text{CDCl}_3$ ,  $\text{cm}^{-1}$ ): 2977, 2934, 1793, 1745, 1699, 1645, 1366, 777. HRMS *calcd.* for ( $\text{C}_{24}\text{H}_{45}\text{N}_4\text{O}_7$ )  $[\text{M}+\text{H}]^+$ : 501.3288, *found* 501.3291.

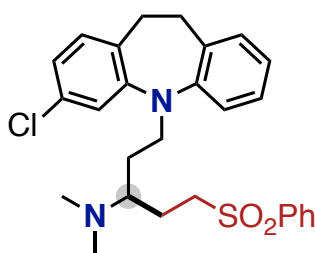

44

**1-(3-chloro-10,11-dihydro-5H-dibenzo[*b,f*]azepin-5-yl)-*N,N*-dimethyl-5-(phenylsulfonyl)pentan-3-amine:** Following the general procedure C with ethyl acetate and hexane as column eluent, the title compound was obtained in 62% yield after 8 h as colorless oil.  $^1\text{H}$  NMR (400 MHz,  $\text{CDCl}_3$ )  $\delta$  7.85 (d,  $J = 8.0$  Hz, 2H), 7.62 (t,  $J = 7.4$  Hz, 1H), 7.52 (t,  $J = 7.7$  Hz, 2H), 7.17-7.09 (m, 2H), 7.03-6.94 (m, 4H), 6.87-6.85 (m, 1H), 3.75-3.72 (m, 1H), 3.59 (dt,  $J = 13.5, 7.0$  Hz, 1H), 3.20-2.99 (m, 6H), 2.51 (br, 1H), 2.03 (s, 6H), 1.82-1.71 (m,

3H), 1.30-1.24 (m, 1H).  $^{13}\text{C}$  NMR (101 MHz,  $\text{CDCl}_3$ )  $\delta$  148.96, 147.61, 139.33, 135.28, 133.73, 131.68, 131.56, 131.46, 129.68, 129.36, 128.07, 126.74, 123.66, 122.33, 120.52, 119.76, 60.19, 53.78, 48.04, 39.94, 32.21, 31.54, 26.20, 23.11. IR ( $\text{CDCl}_3$ ,  $\text{cm}^{-1}$ ): 3062, 2929, 2826, 1585, 1483, 1303, 1086, 731. HRMS *calcd.* for ( $\text{C}_{27}\text{H}_{32}\text{N}_2\text{O}_2\text{SCl}$ )  $[\text{M}+\text{H}]^+$ : 483.1873, *found* 483.1879.

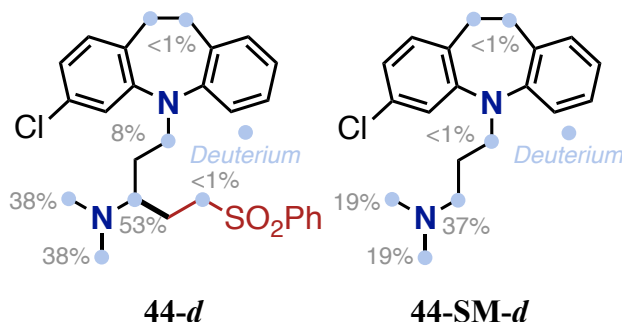

Following the general procedure C in presence of  $\text{D}_2\text{O}$  (50 eq.), compound **33-d** was obtained in 60% yield after 8 h as colorless oil, the remaining unreactive starting material **33-SM-d** (2.2 eq.) was recovered.

*Note: see below H-NMR spectrums for details.*

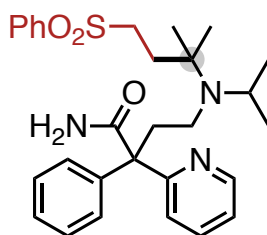

**45**

**4-(isopropyl(2-methyl-4-(phenylsulfonyl)butan-2-yl)amino)-2-phenyl-2-(pyridin-2-yl)butanamide:** Following the general procedure C, the title compound was obtained in 71% yield after 8 h as yellow oil.  $^1\text{H}$  NMR (400 MHz,  $\text{CDCl}_3$ )  $\delta$  8.69 (br, 1H), 8.55-8.53 (m, 1H), 7.92-7.90 (m, 2H), 7.66-7.60 (m, 2H), 7.58-7.54 (m, 2H), 7.31-7.16 (m, 7H), 5.80 (br, 1H), 3.24-3.20 (m, 2H), 2.90 (p,  $J = 6.5$  Hz, 1H), 2.68-2.62 (m, 1H), 2.42-2.30 (m, 2H), 2.25-2.19 (m, 1H), 1.70 (dd,  $J = 11.6, 4.7$  Hz, 1H), 0.92 (s, 3H), 0.88 (s, 3H), 0.78 (d,  $J = 6.5$  Hz, 3H), 0.74 (d,  $J = 6.5$  Hz, 3H).  $^{13}\text{C}$  NMR (101 MHz,  $\text{CDCl}_3$ )  $\delta$  175.64, 163.44, 147.26, 144.44, 139.71, 136.95, 133.61, 129.35, 128.37, 128.22, 128.10, 124.50, 121.82, 60.70, 57.36, 52.61, 46.76, 42.66, 37.91, 34.01, 26.60, 26.40, 22.23. IR ( $\text{CDCl}_3$ ,  $\text{cm}^{-1}$ ): 3274, 3060, 2970, 1675, 1586, 1290, 1145, 730. HRMS *calcd.* for ( $\text{C}_{29}\text{H}_{38}\text{N}_3\text{O}_3\text{S}$ )  $[\text{M}+\text{H}]^+$ : 508.2634, *found* 508.2652.

*Note: single isomer was obtained due to the  $\beta$ -cleavage of secondary  $\alpha$ -amino radical. The by-product diaryl acetamide was isolated as an evidence.*

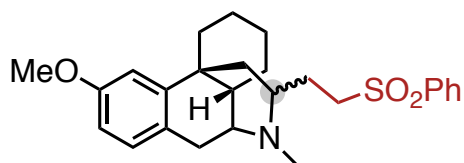

**46** (~dr. 5.5:1)

**(4b*S*,8a*S*)-3-methoxy-11-methyl-12-(2-(phenylsulfonyl)ethyl)-6,7,8,8a,9,10-hexahydro-5*H*-9,4*b*-(epiminoethano)phenanthrene:** Following the general procedure C, the title compound was obtained in 45% yield (~dr. 5.5:1) after 8 h as colorless oil.  $^1\text{H}$  NMR (400 MHz,  $\text{CDCl}_3$ )  $\delta$  7.93-7.86 (m, 2H), 7.65-7.61 (m, 1H), 7.57-7.52 (m, 2H), 6.99 (d,  $J = 8.3$  Hz, 1H), 6.74 (d,  $J = 2.6$  Hz, 1H), 6.69 (dd,  $J = 8.3, 2.5$  Hz, 1H), 3.77 (s, 3H), 3.26-2.16 (m, 10 H), 1.85-1.03 (m, 12H). Major isomer:  $^{13}\text{C}$  NMR (101 MHz,  $\text{CDCl}_3$ )  $\delta$  158.34, 141.66, 139.29, 133.59, 129.28, 129.23, 128.74, 128.01, 111.09, 110.93, 60.22, 55.20, 52.81, 51.38, 46.84, 44.76, 39.37, 38.04, 36.59, 26.46, 26.36, 24.68, 21.98. IR ( $\text{CDCl}_3$ ,  $\text{cm}^{-1}$ ): 3061, 2926, 2854, 1497, 1303, 1238, 1145, 730. HRMS *calcd.* For ( $\text{C}_{26}\text{H}_{34}\text{NO}_3\text{S}$ )  $[\text{M}+\text{H}]^+$ : 440.2260, *found* 440.2250.

## VI. References

1. Cismesia, M. A.; Yoon, T. P. Characterizing chain processes in visible light photoredox catalysis. *Chem. Sci.*, **2015**, *6*, 5426-5434
2. Zhou, R., Goh, Y. Y., Liu, H., Tao, H., Li, L., Wu, J. Visible-light-mediated metal-free hydrosilylation of alkenes through selective hydrogen atom transfer for Si-H activation. *Angew. Chem. Int. Ed.* **56**, 16621-16625 (2017).
3. Gaussian 16, Revision A.03, Frisch, M. J., Trucks, G. W., Schlegel, H. B., Scuseria, G. E., Robb, M. A., Cheeseman, J. R., Scalmani, G., Barone, V., Petersson, G. A., Nakatsuji, H., Li, X., Caricato, M., Marenich, A. V., Bloino, J., Janesko, B. G., Gomperts, R., Mennucci, B., Hratchian, H. P., Ortiz, J. V., Izmaylov, A. F., Sonnenberg, J. L., Williams-Young, D., Ding, F., Lipparini, F., Egidi, F., Goings, J., Peng, B., Petrone, A., Henderson, T., Ranasinghe, D., Zakrzewski, V. G., Gao, J., Rega, N., Zheng, G., Liang, W., Hada, M., Ehara, M., Toyota, K., Fukuda, R., Hasegawa, J., Ishida, M., Nakajima, T., Honda, Y., Kitao, O., Nakai, H., Vreven, T., Throssell, K., Montgomery Jr. J. A., Peralta, J. E., Ogliaro, F., Bearpark, M. J., Heyd, J. J., Brothers, E. N., Kudin, K. N., Staroverov, V. N., Keith, T. A., Kobayashi, R., Normand, J., Raghavachari, K., Rendell, A. P., Burant, J. C., Iyengar, S. S., Tomasi, J., Cossi, M., Millam, J. M., Klene, M., Adamo, C., Cammi, R., Ochterski, J. W., Martin, R. L., Morokuma, K., Farkas, O., Foresman, J. B., Fox, D. J. Gaussian, Inc., Wallingford CT, 2016.
4. Legault, C. Y. CYLview, Version 1.0b. Université de Sherbrooke. (2009); <http://www.cylview.org>.

# VII. $^1\text{H}$ , $^{13}\text{C}$ and $^{19}\text{F}$ NMR spectra

ys-289.141.fid

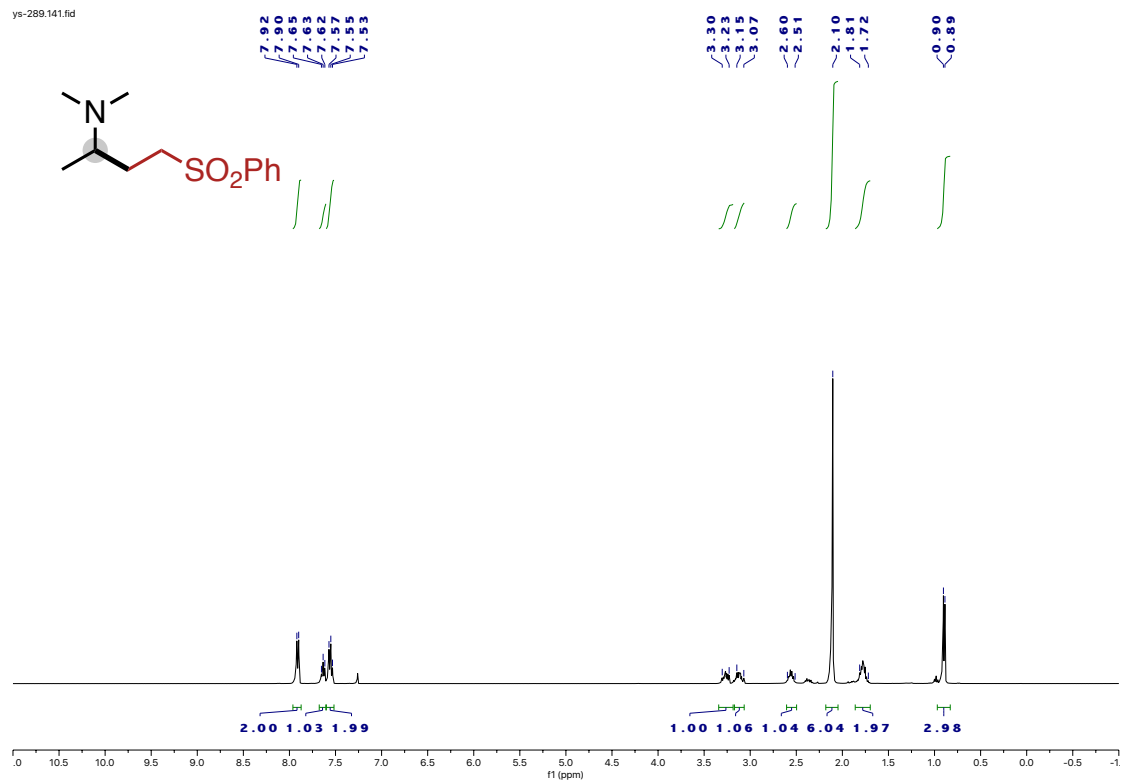

ys-289-c13.37.fid  
Carbon 13

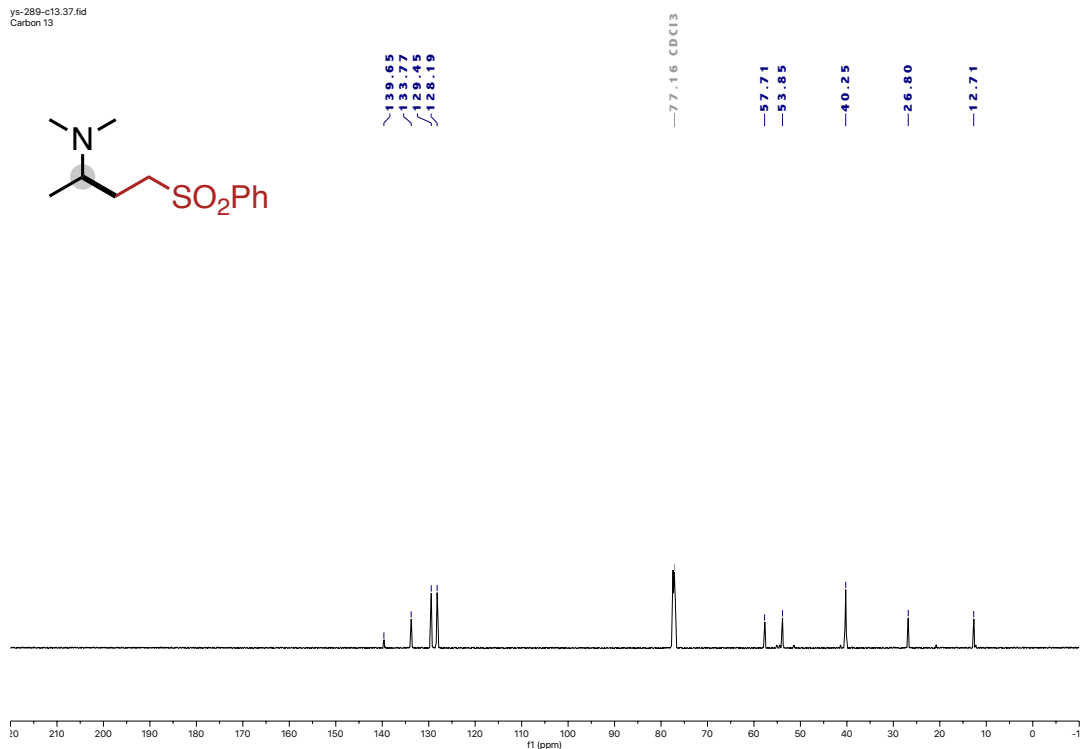



ys-350-2.211.fid

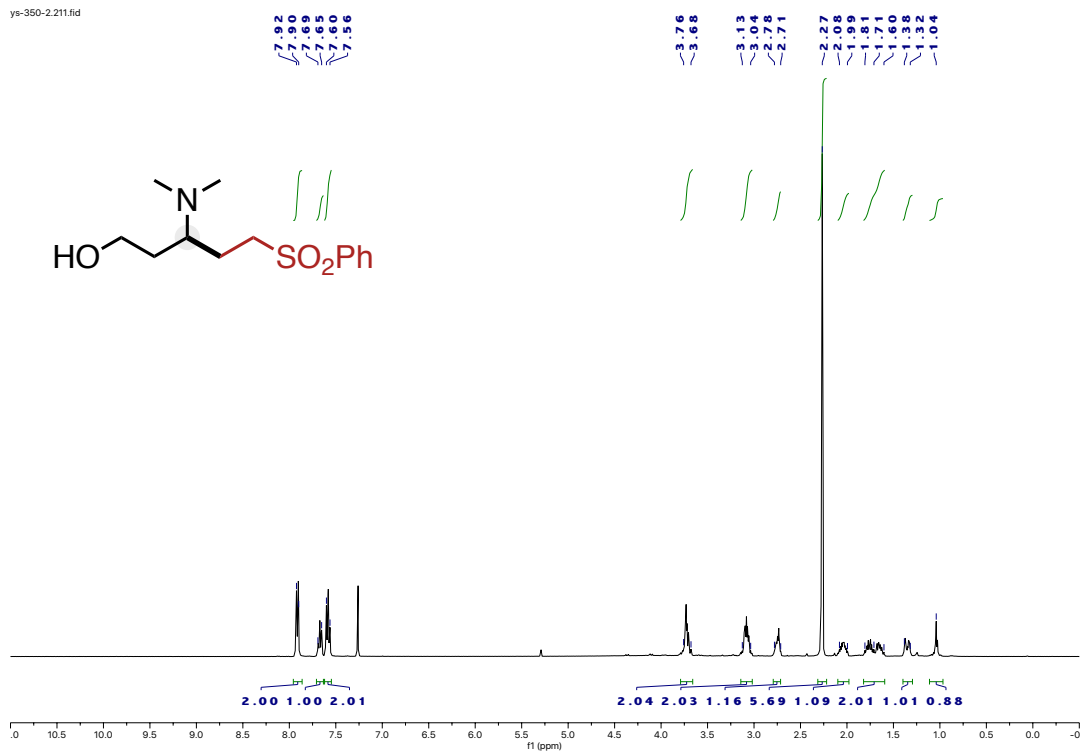

ys-350-2-c13.57.fid

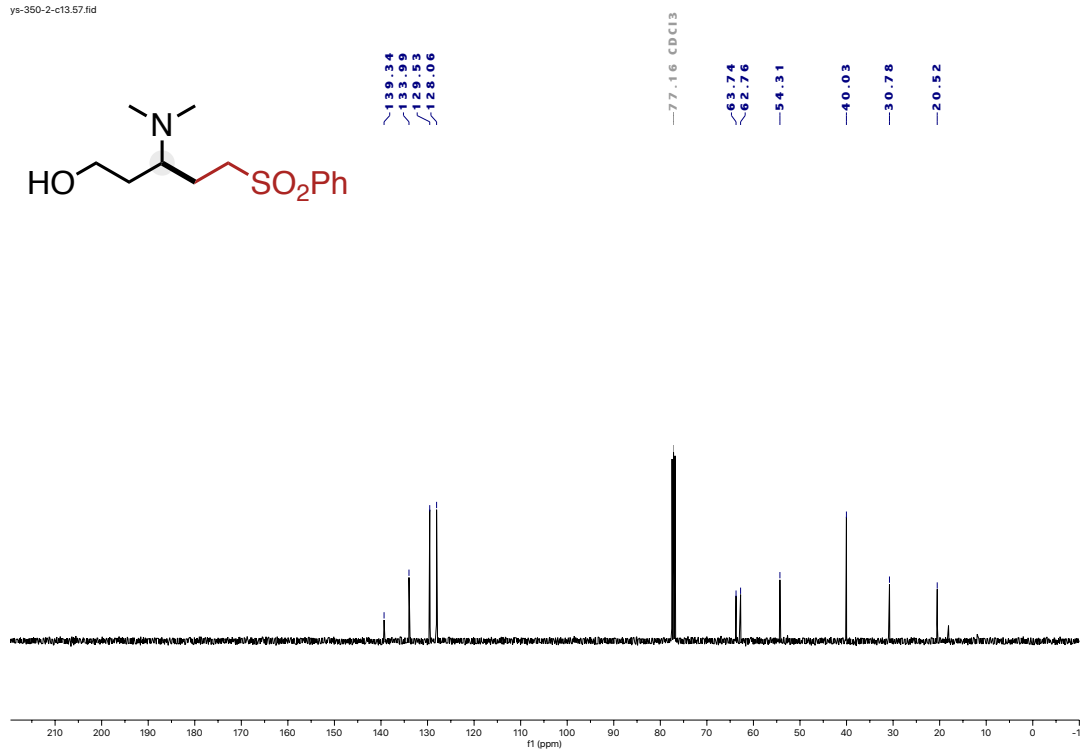

ys-285-2a.26.fid  
Proton

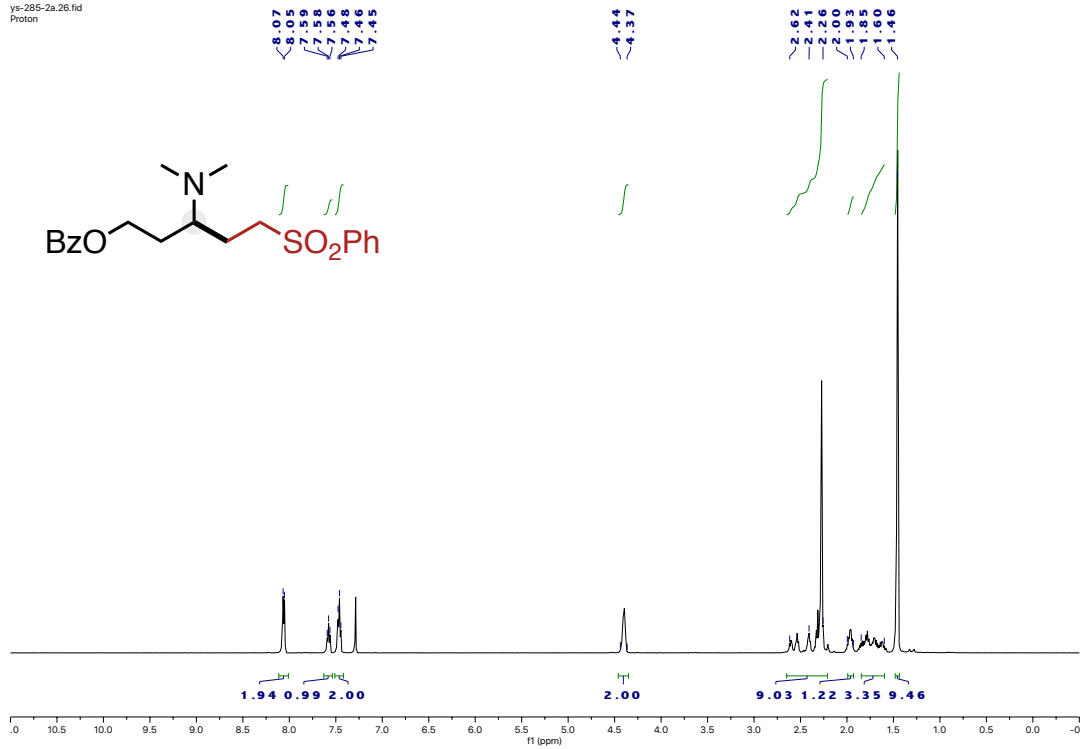

ys-285-1-c13.28.fid  
Carbon 13

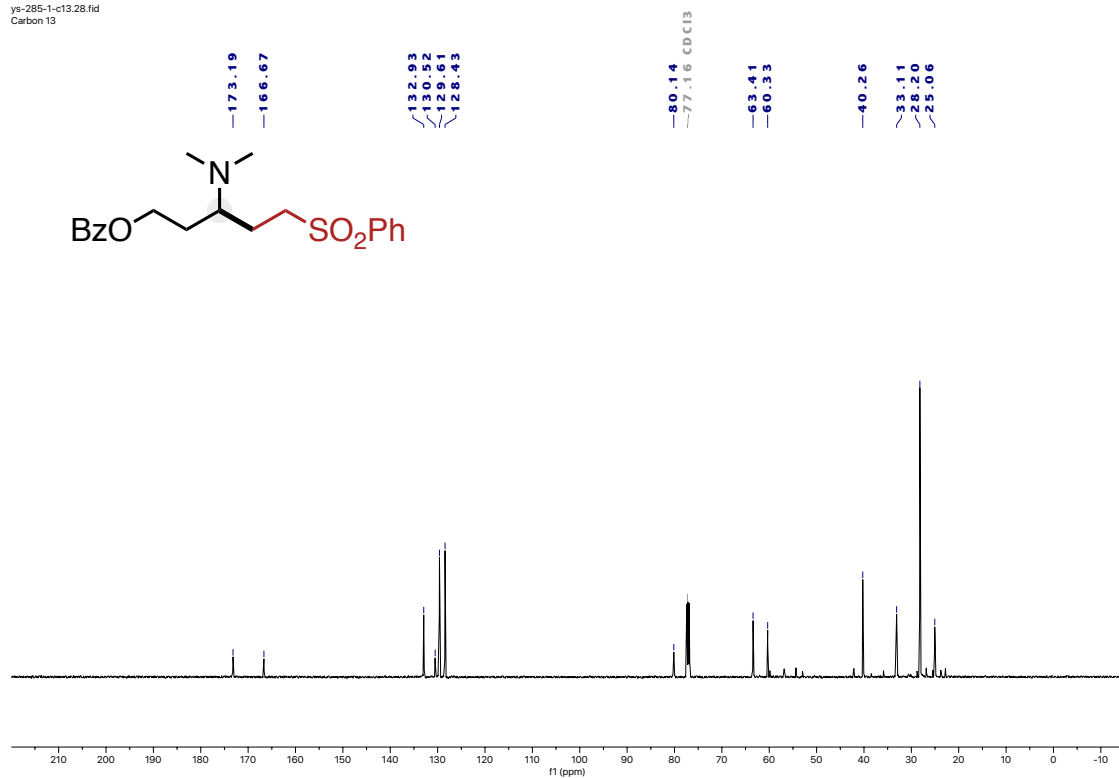

ys-417-1.94.fid  
proton

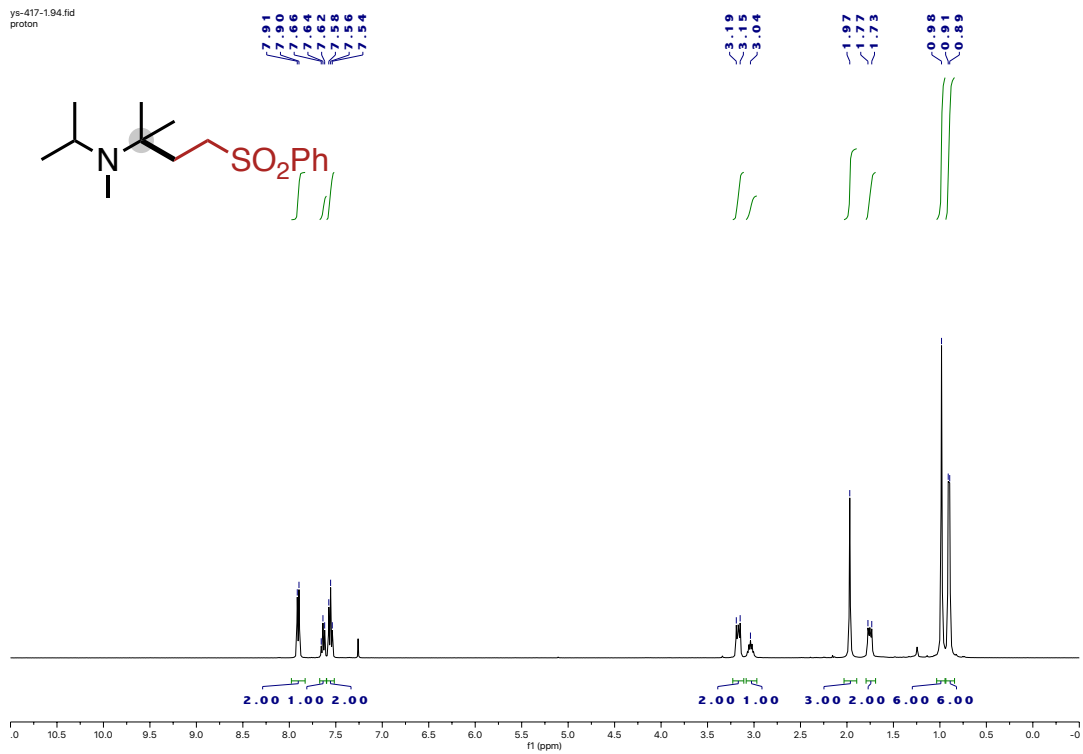

ys-417-1-c13.100.fid

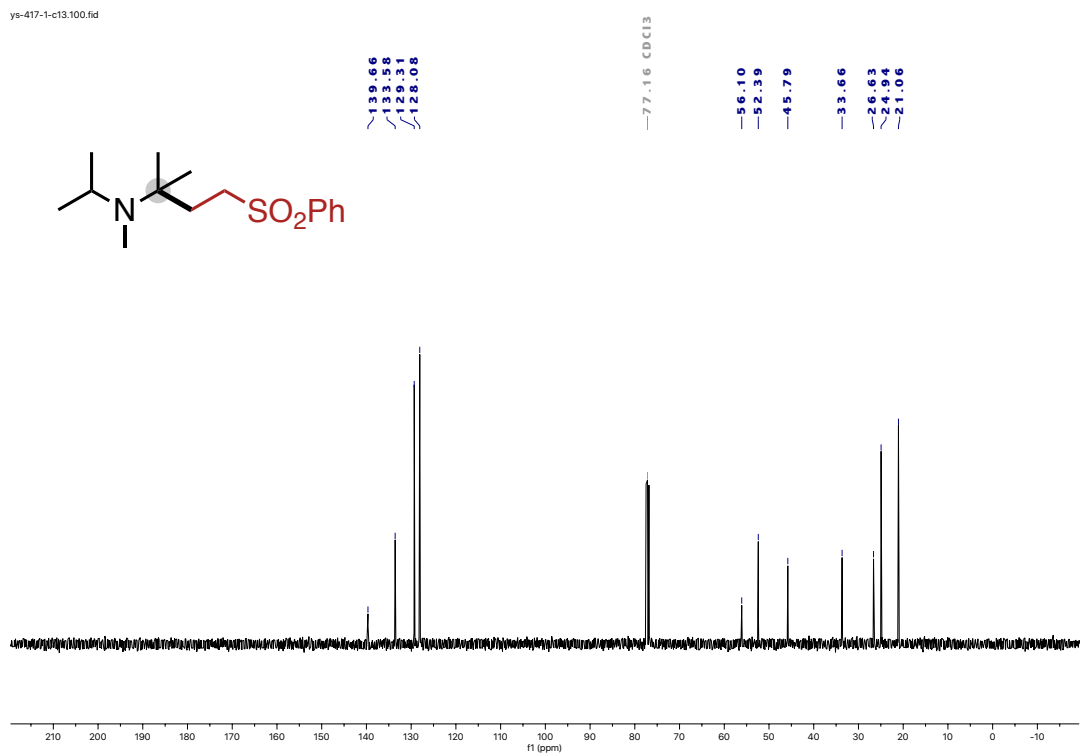

ys-413-2.83.fid  
proton

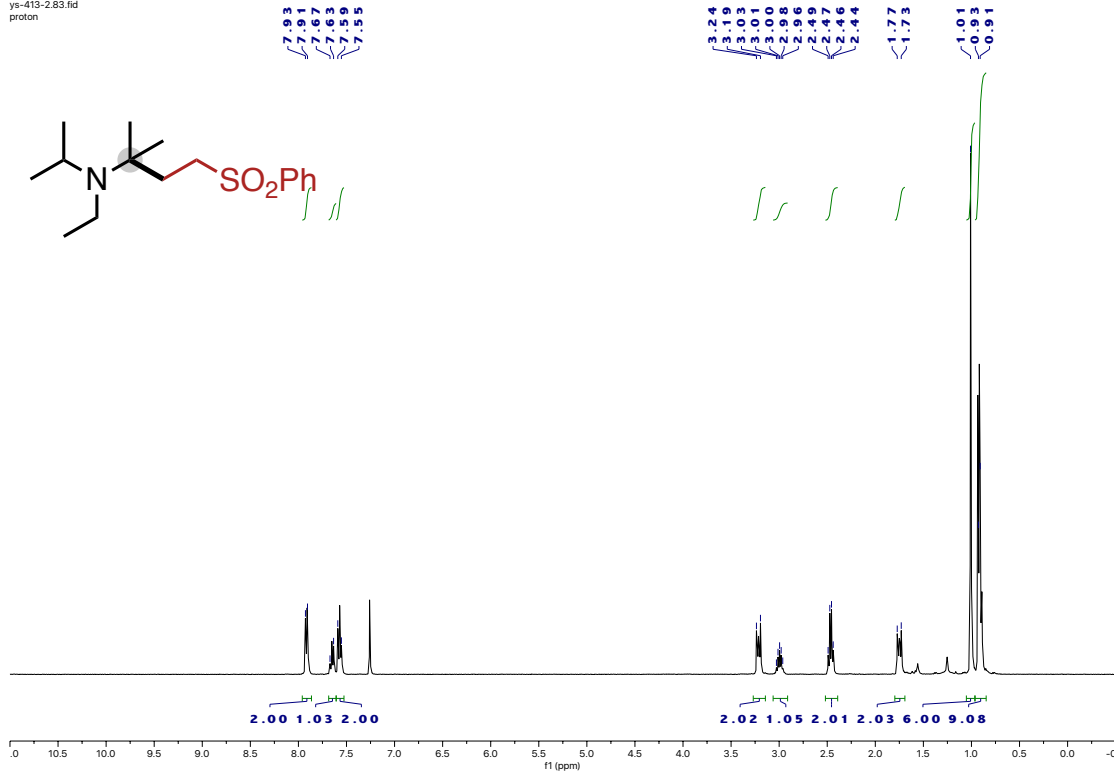

ys-413-2-c13.88.fid

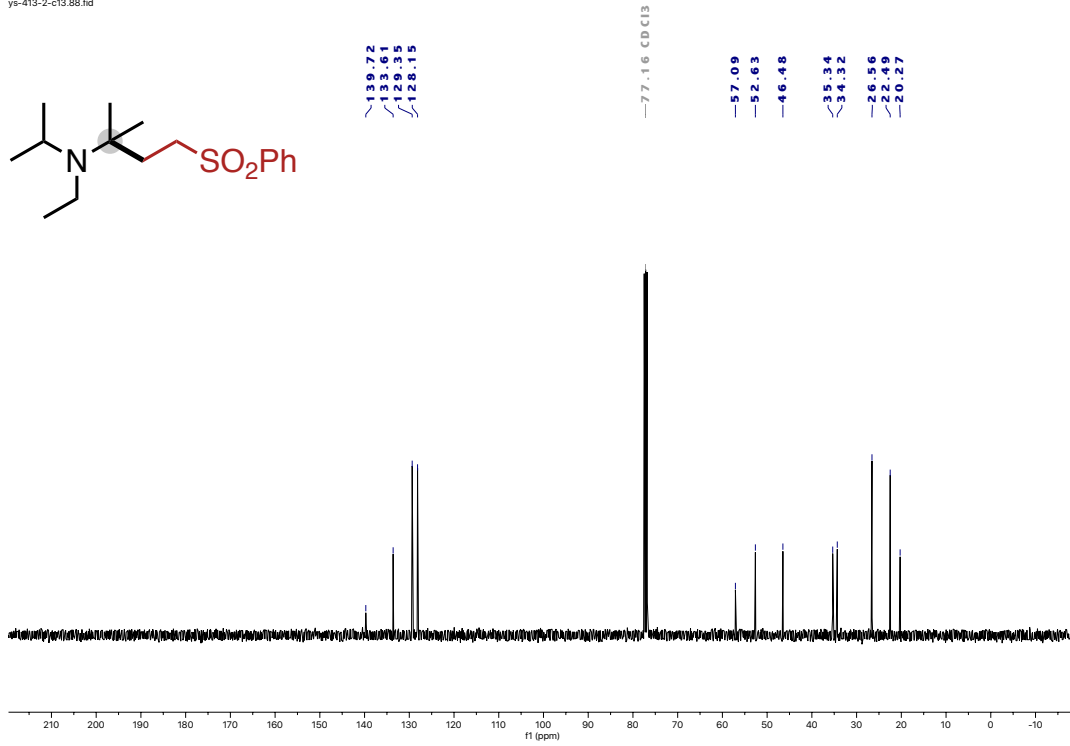

ys-411-3.86.fid  
proton

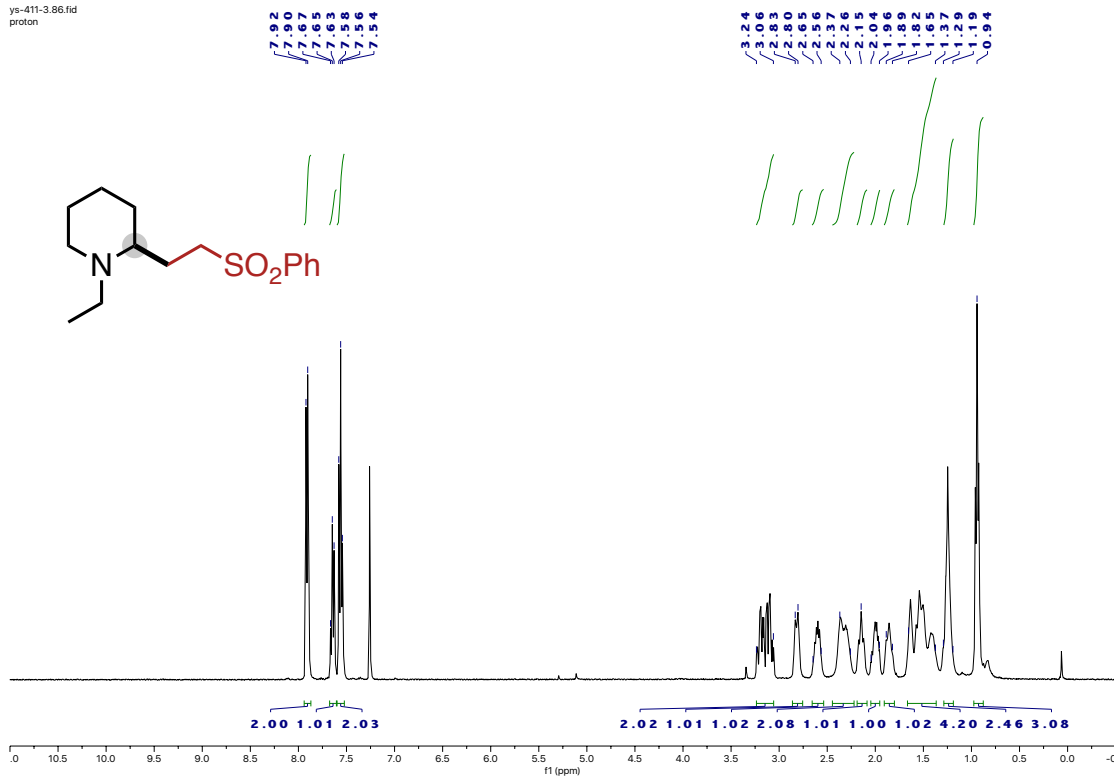

ys-411-3-c13.87.fid

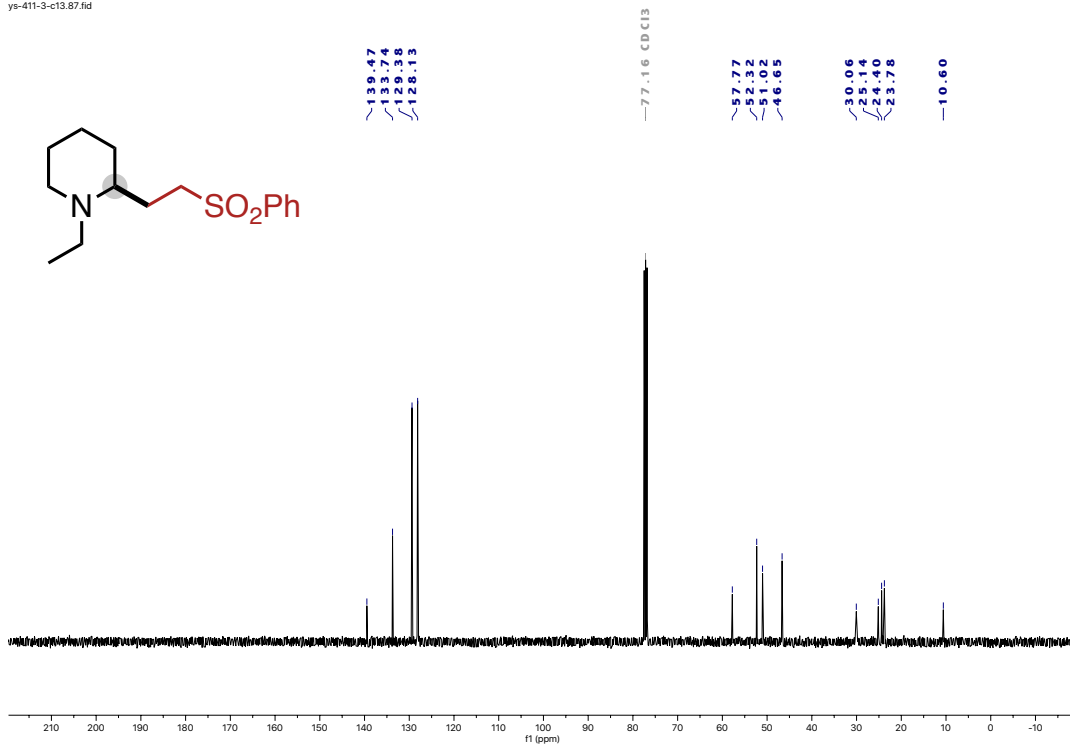

ys-411-2.85.fid  
proton

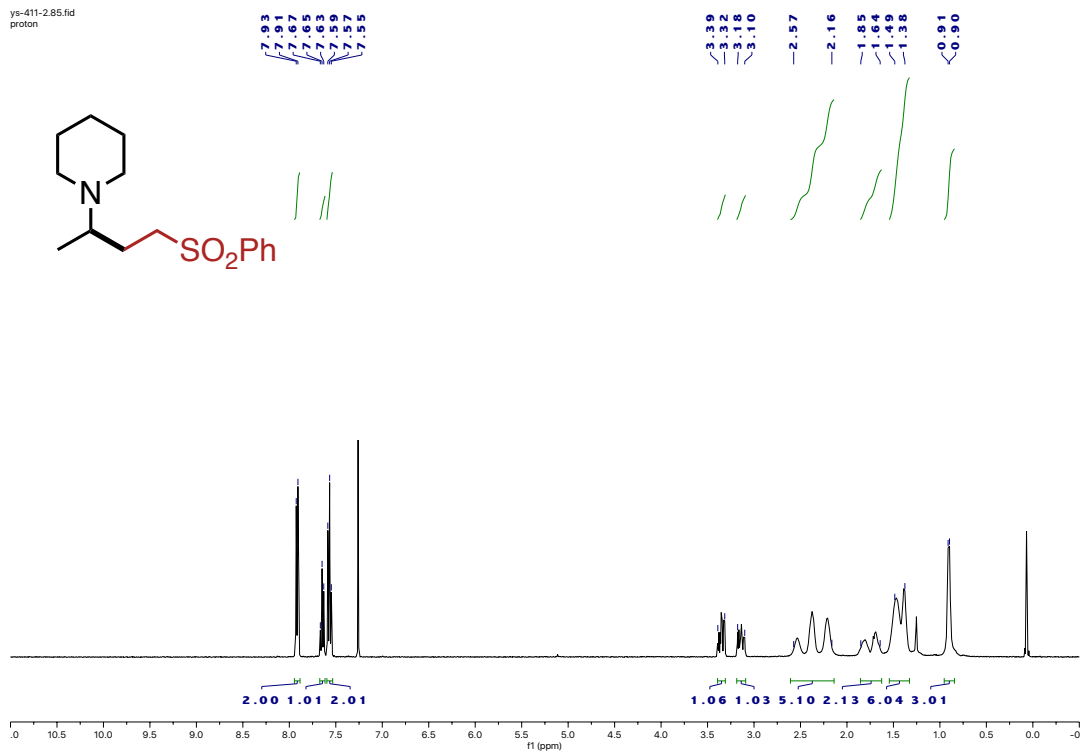

ys-411-2-c13.89.fid

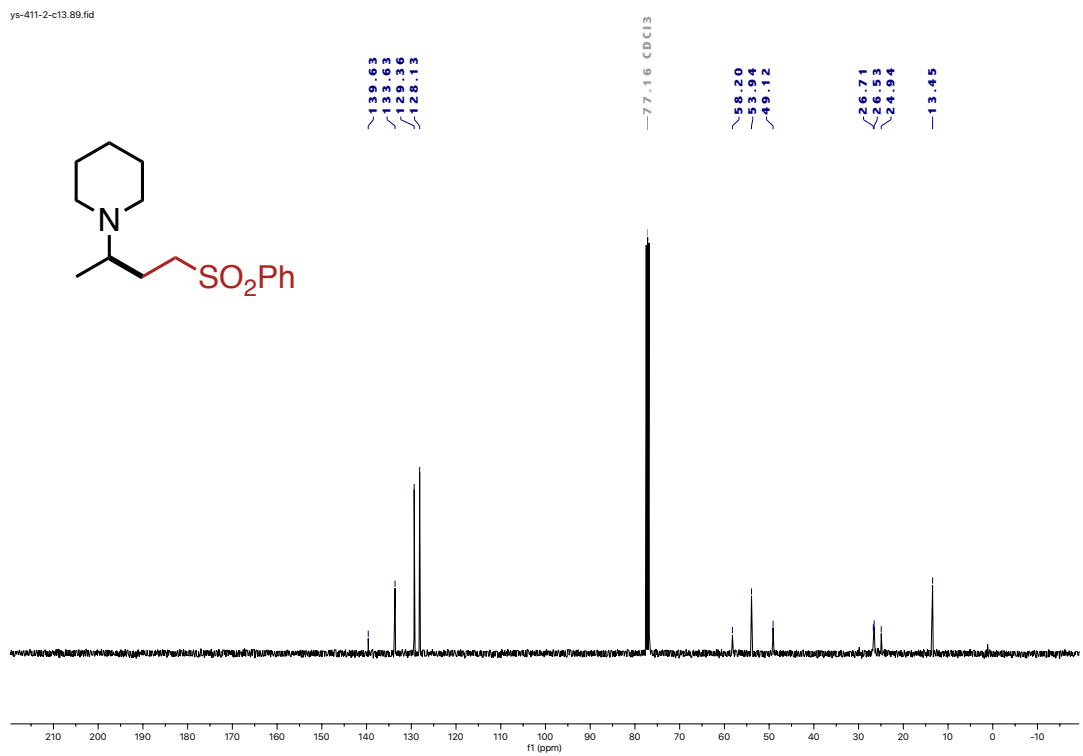

ys-349-pure-aaa.213.fid

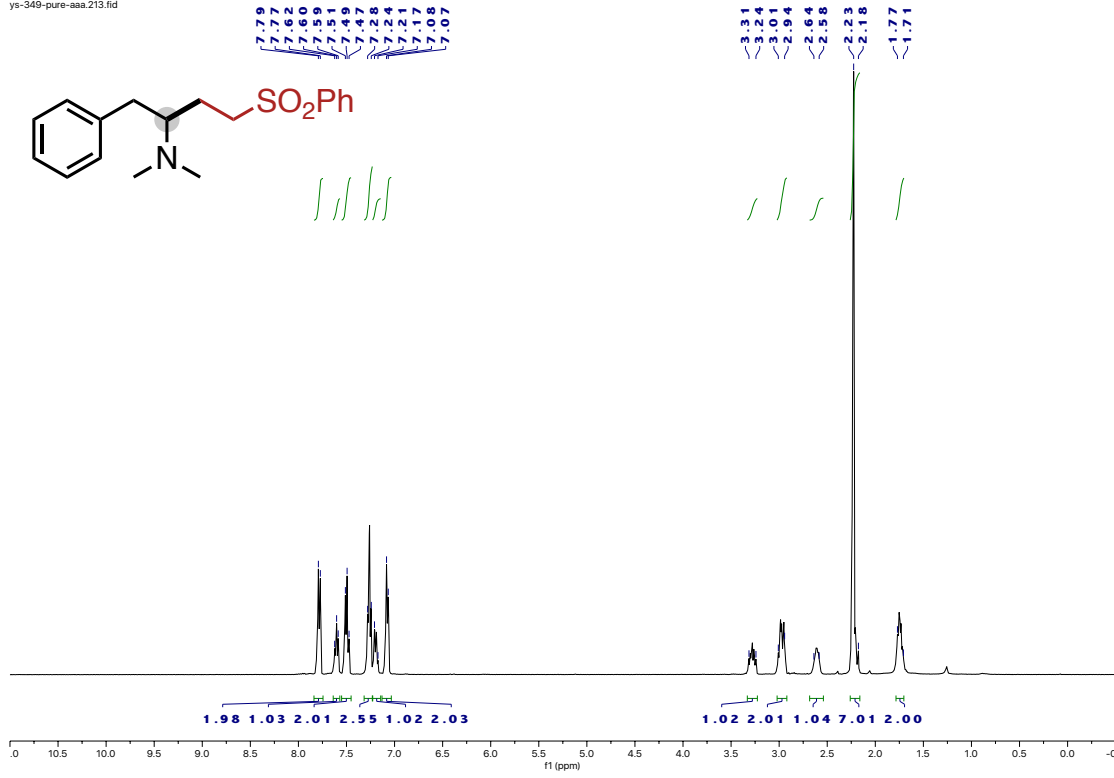

ys-349-pure-c13.56.fid

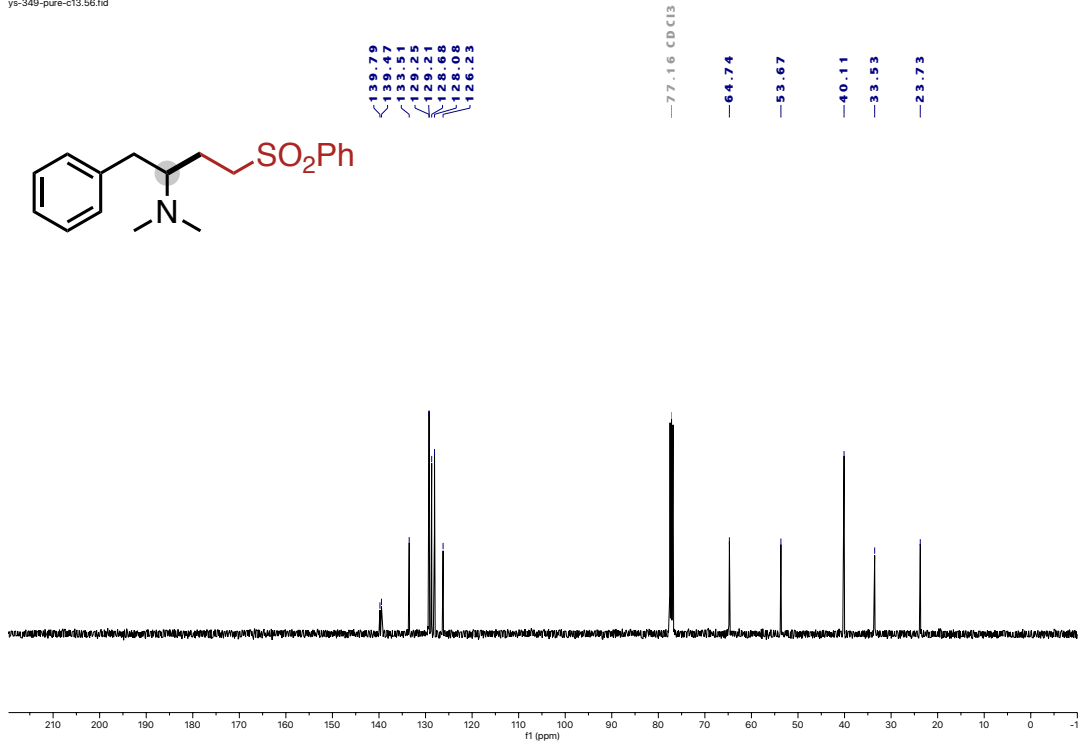

ys-286.27.fid  
Proton

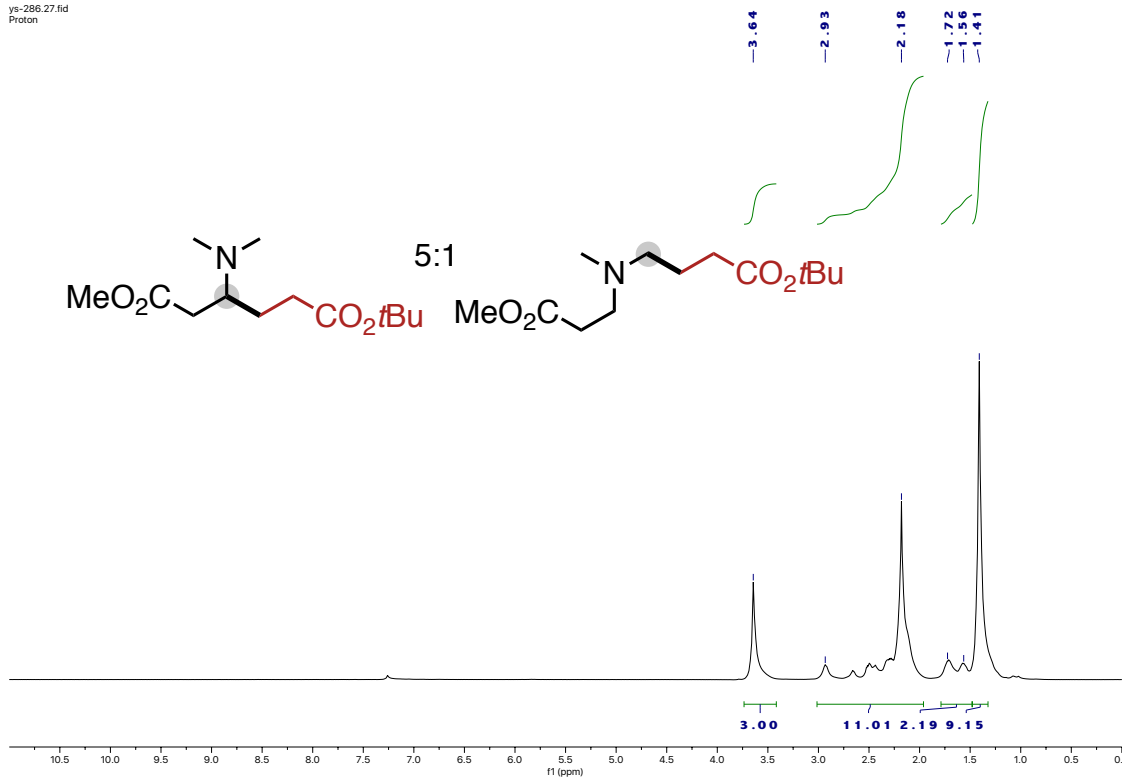

ys-286-c13.29.fid  
Carbon 13

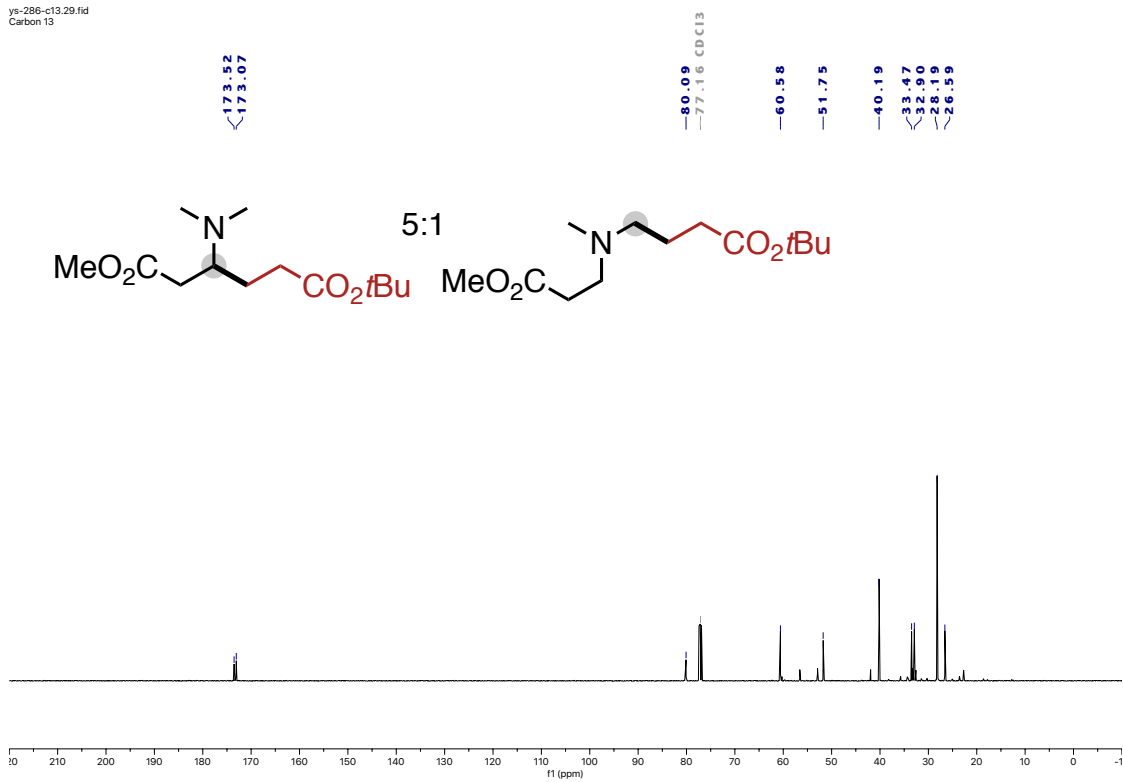



ys-421-1.97.fid  
proton

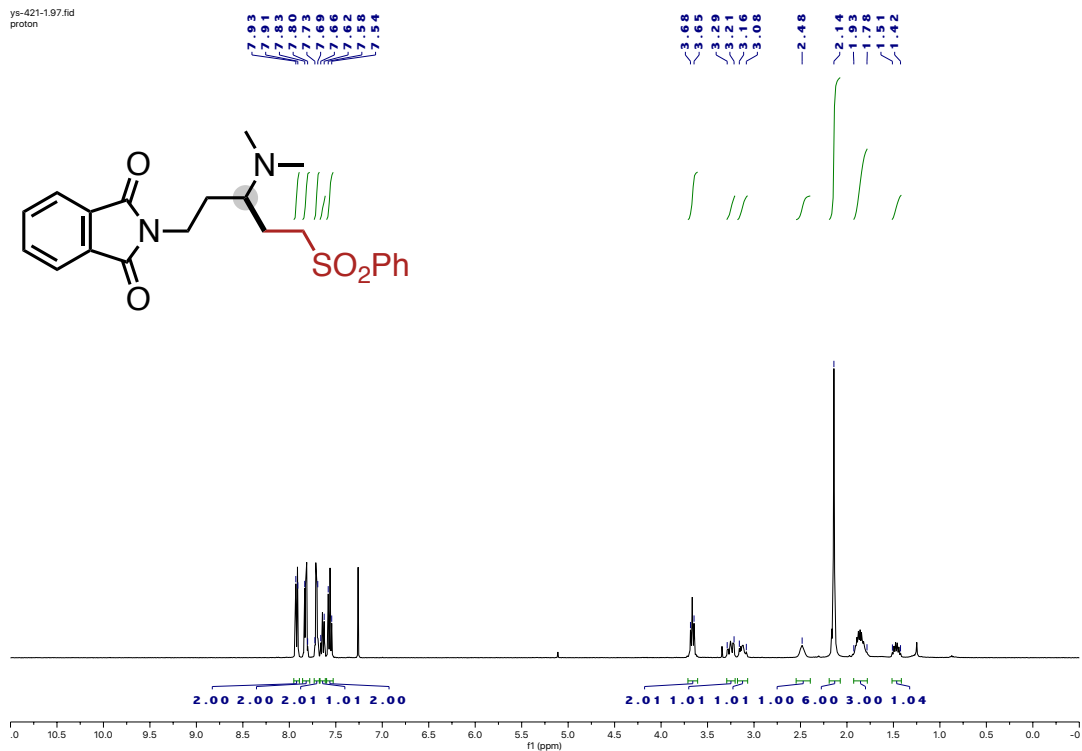

ys-421-1-c13.101.fid

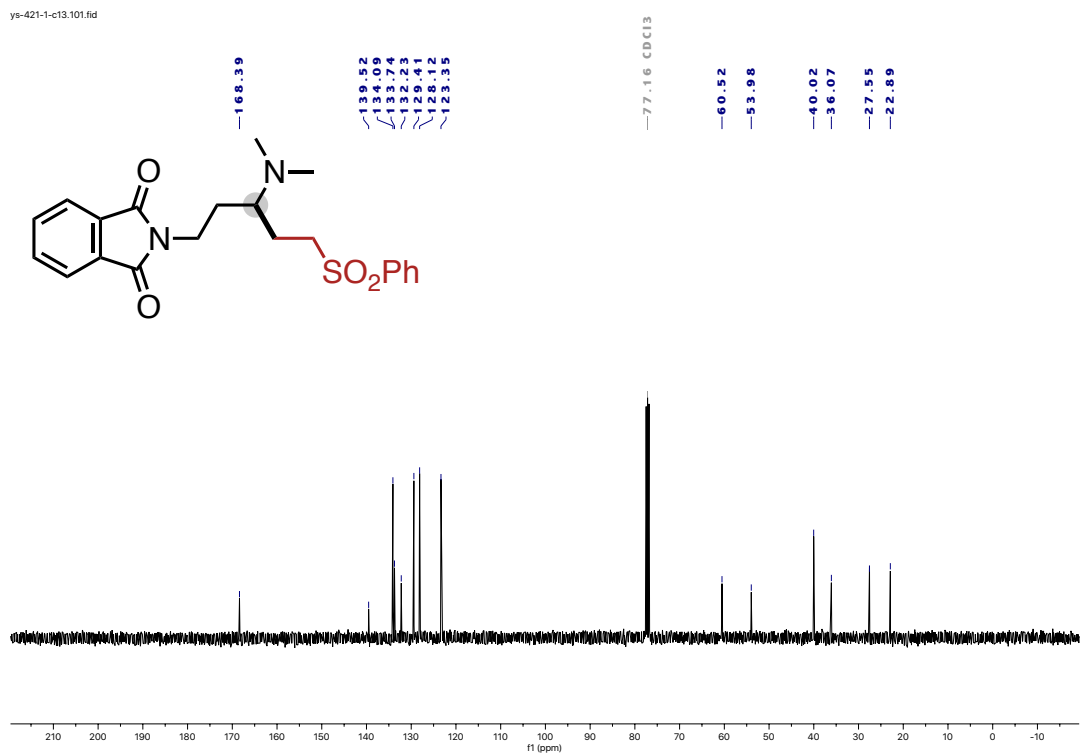

ys-362-2192.fid

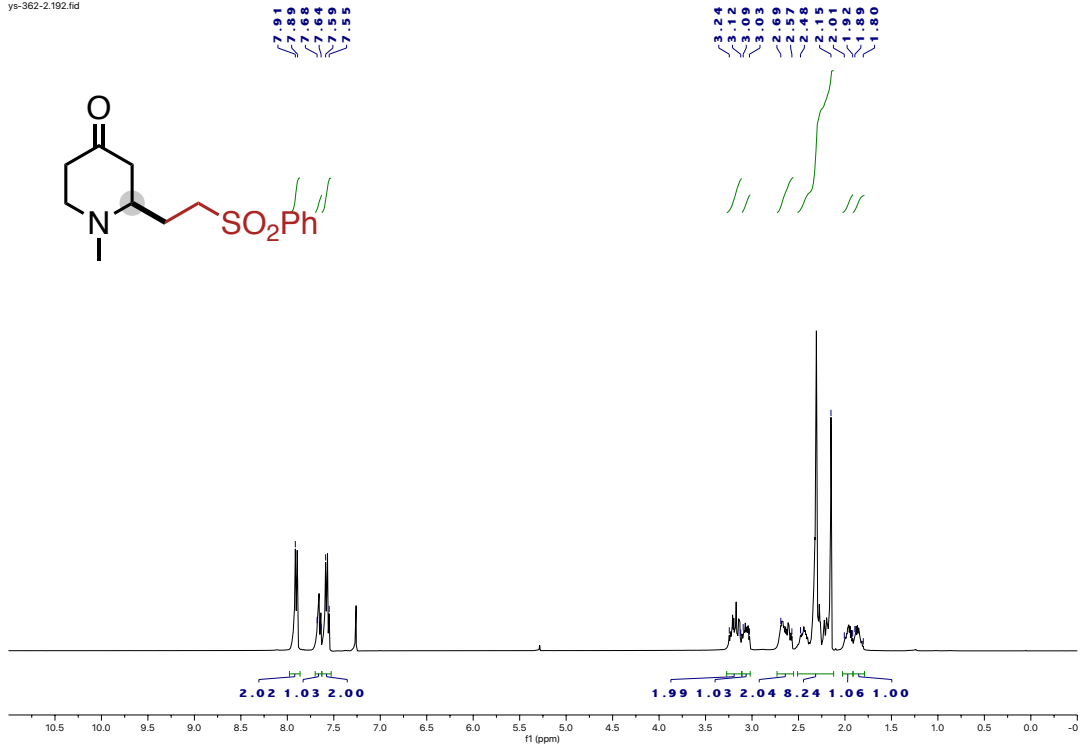

ys-362-2-c13-a.54.fid

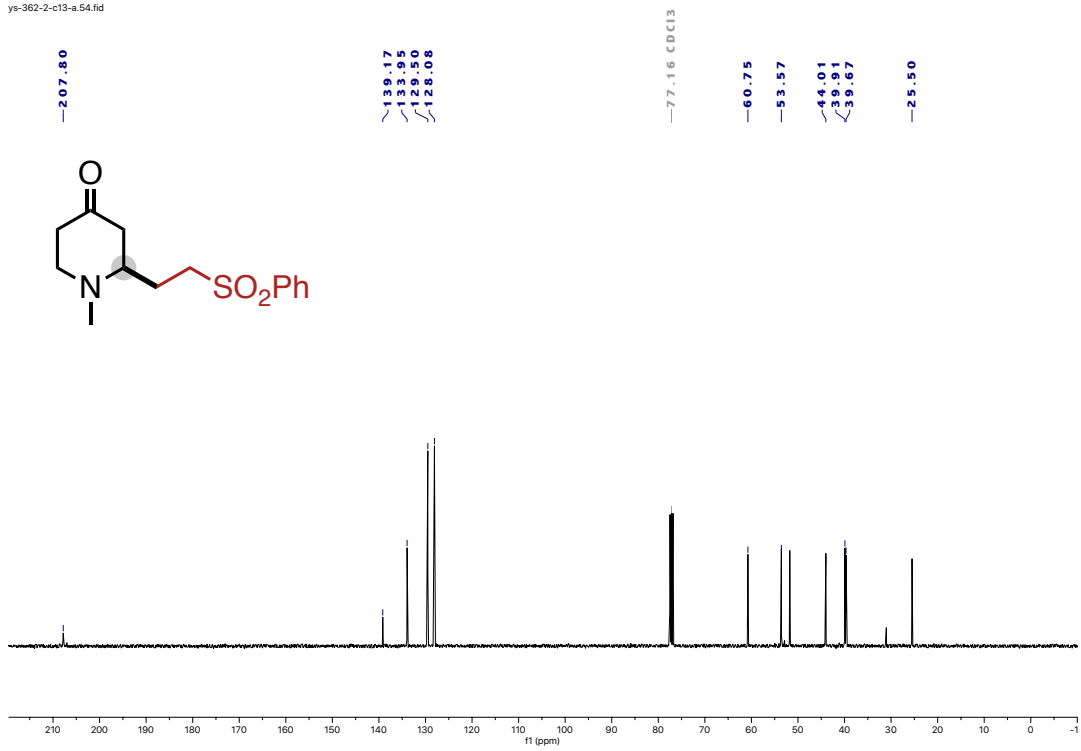

ys-338-2-2.26.fid  
proton

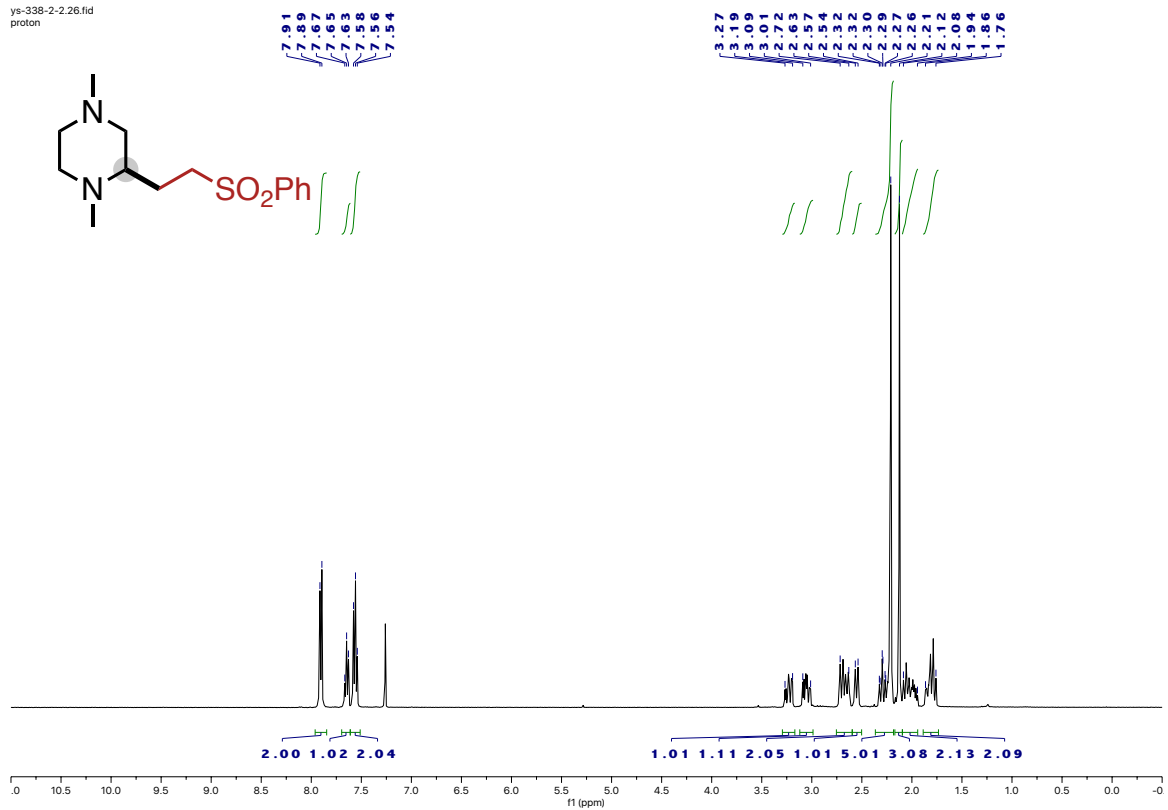

ys-338-2-2-c13.39.fid  
Carbon 13

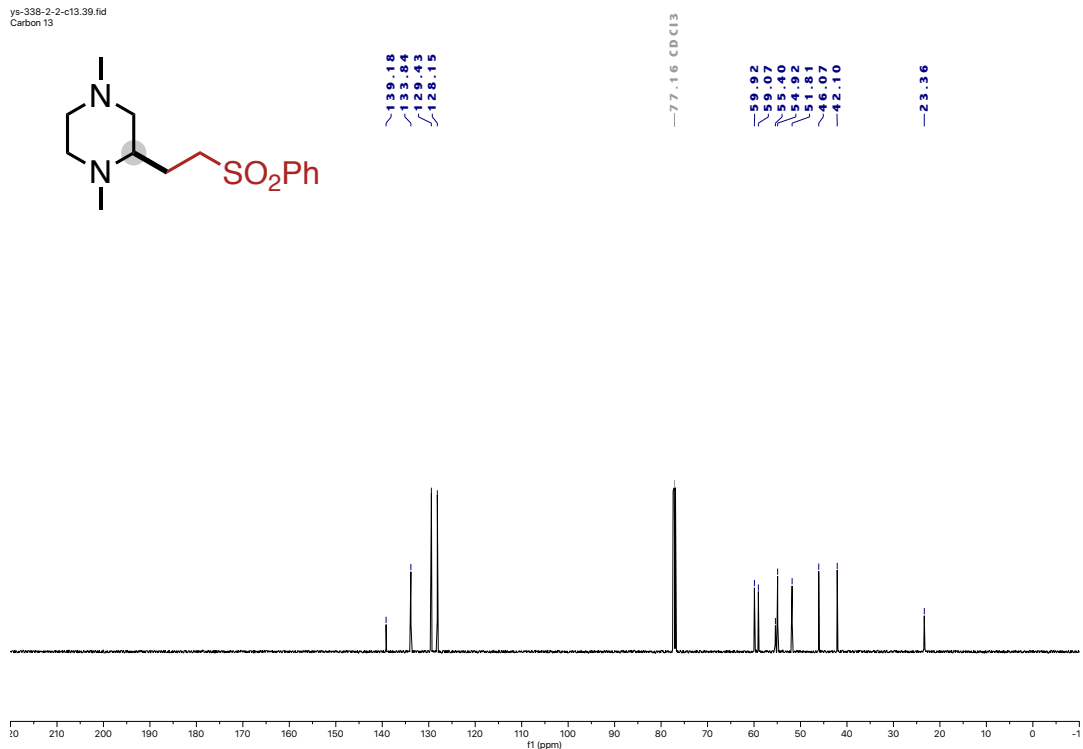

ys-337-2-again-h.168.fid

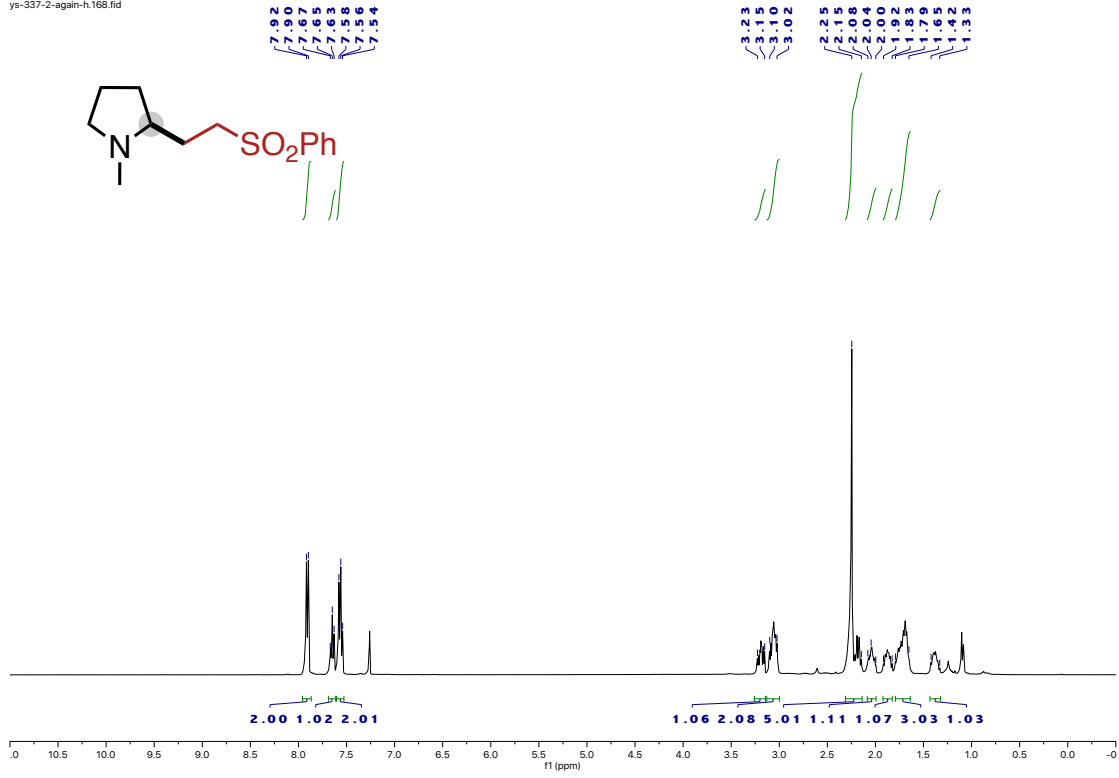

ys-337-2-again-c13.41.fid  
Carbon 13

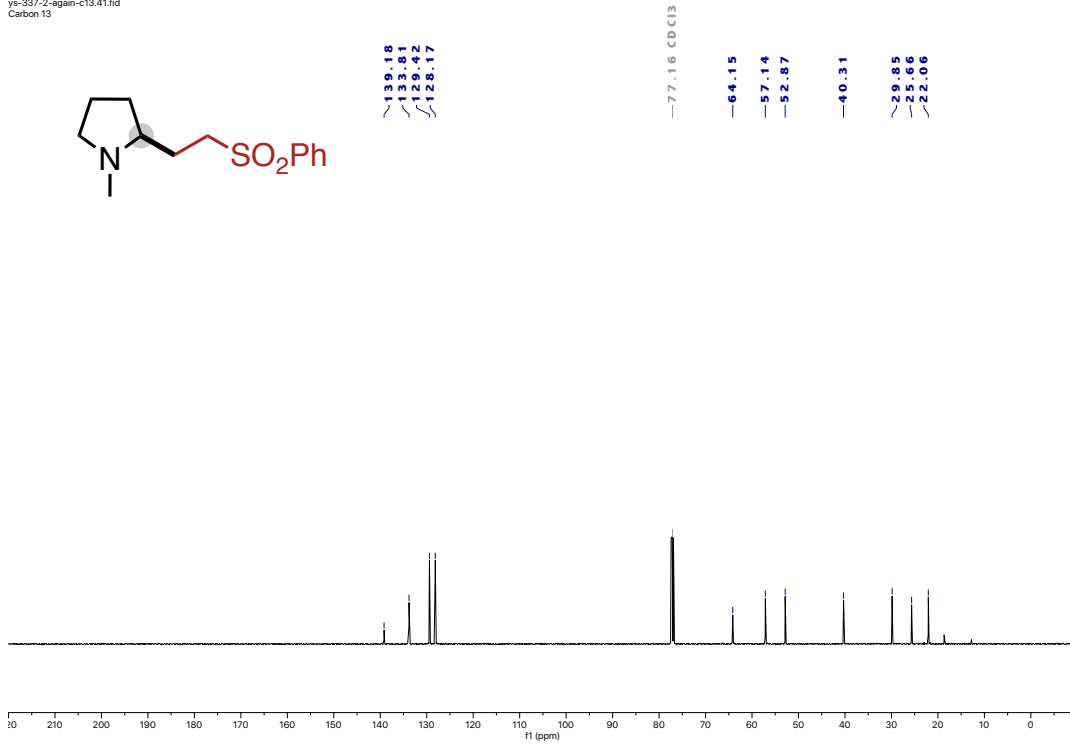

ys-782-1-1.60.fid  
Proton

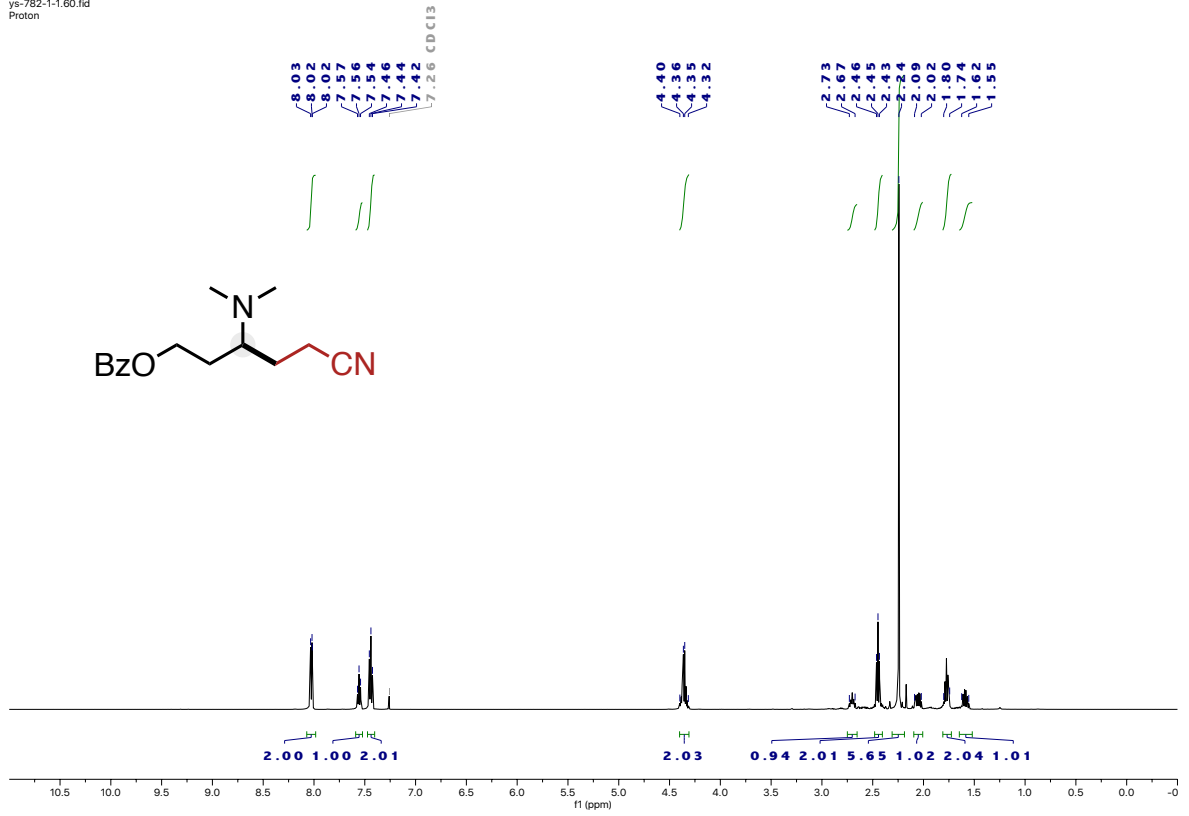

ys-782-1-1-500c.61.fid  
Carbon 13

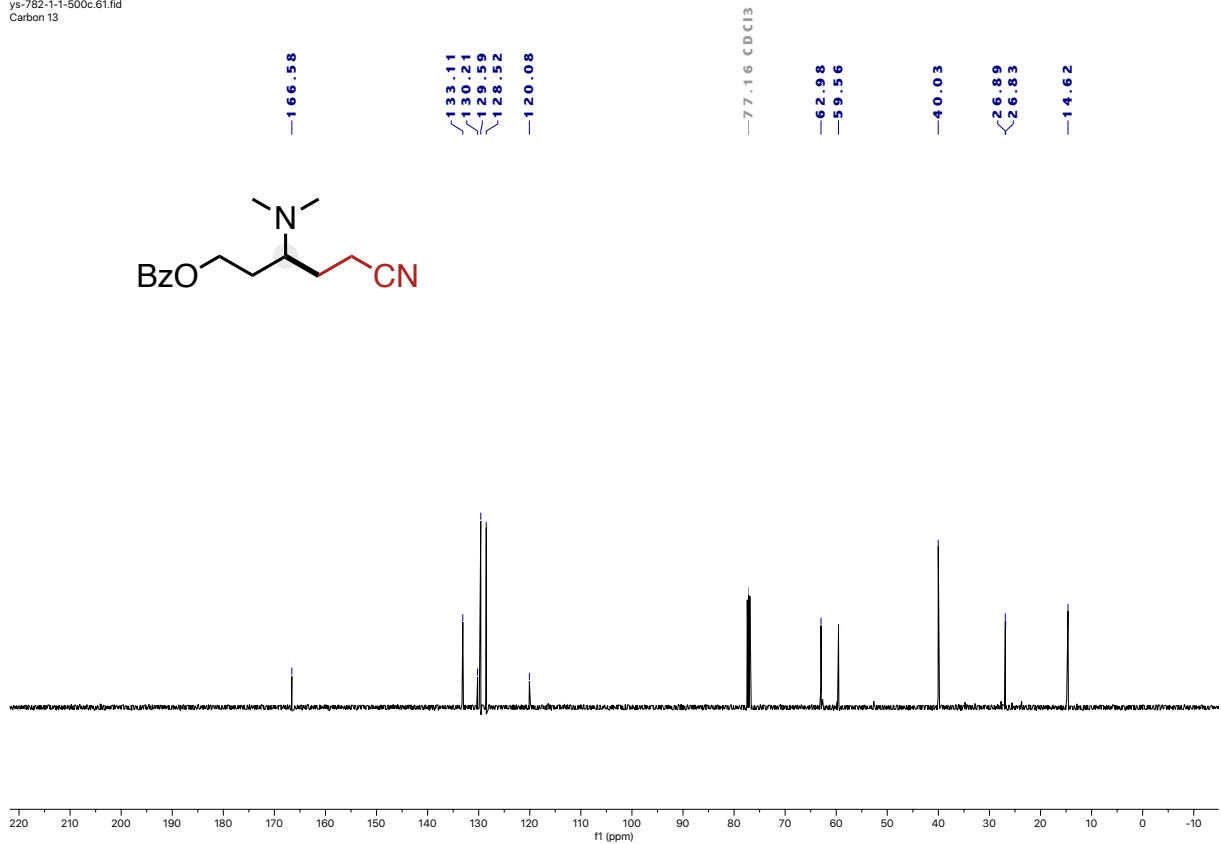

ys-782-1-2.62.fid  
Proton

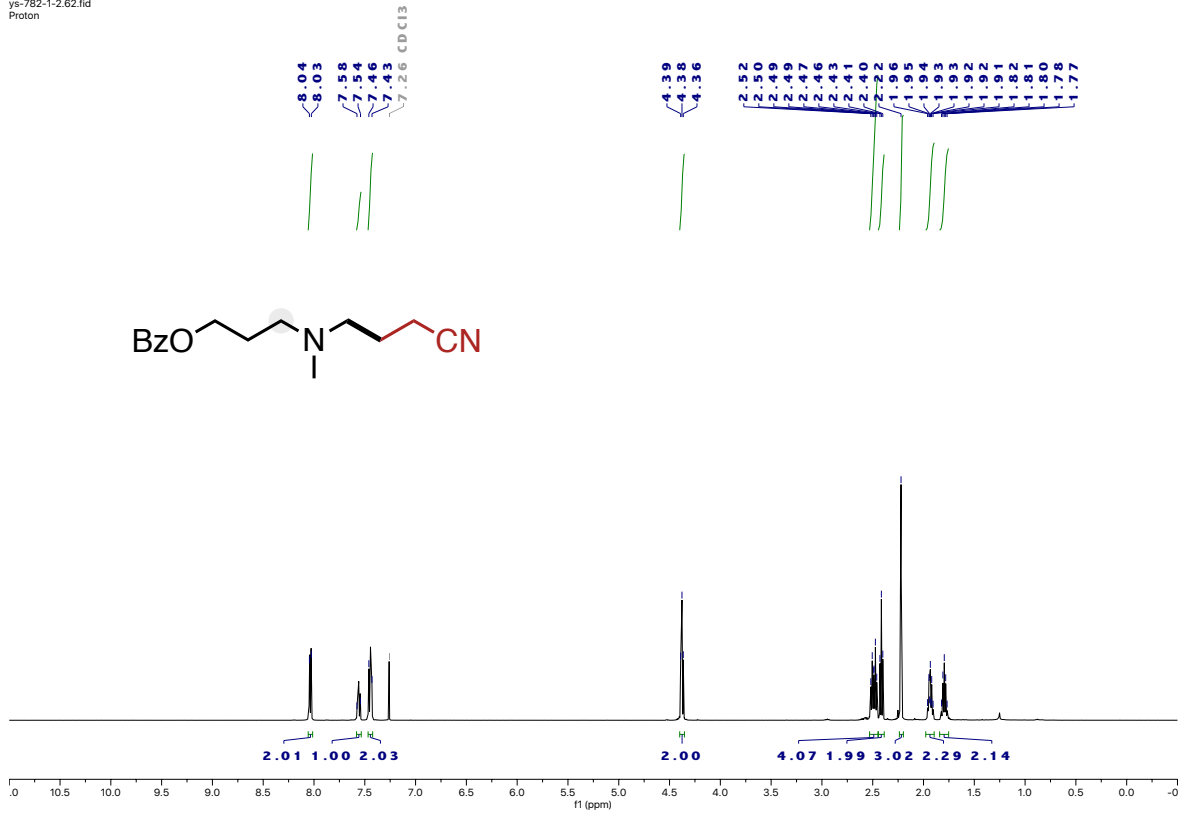

ys-782-1-2-500c.63.fid  
Carbon 13

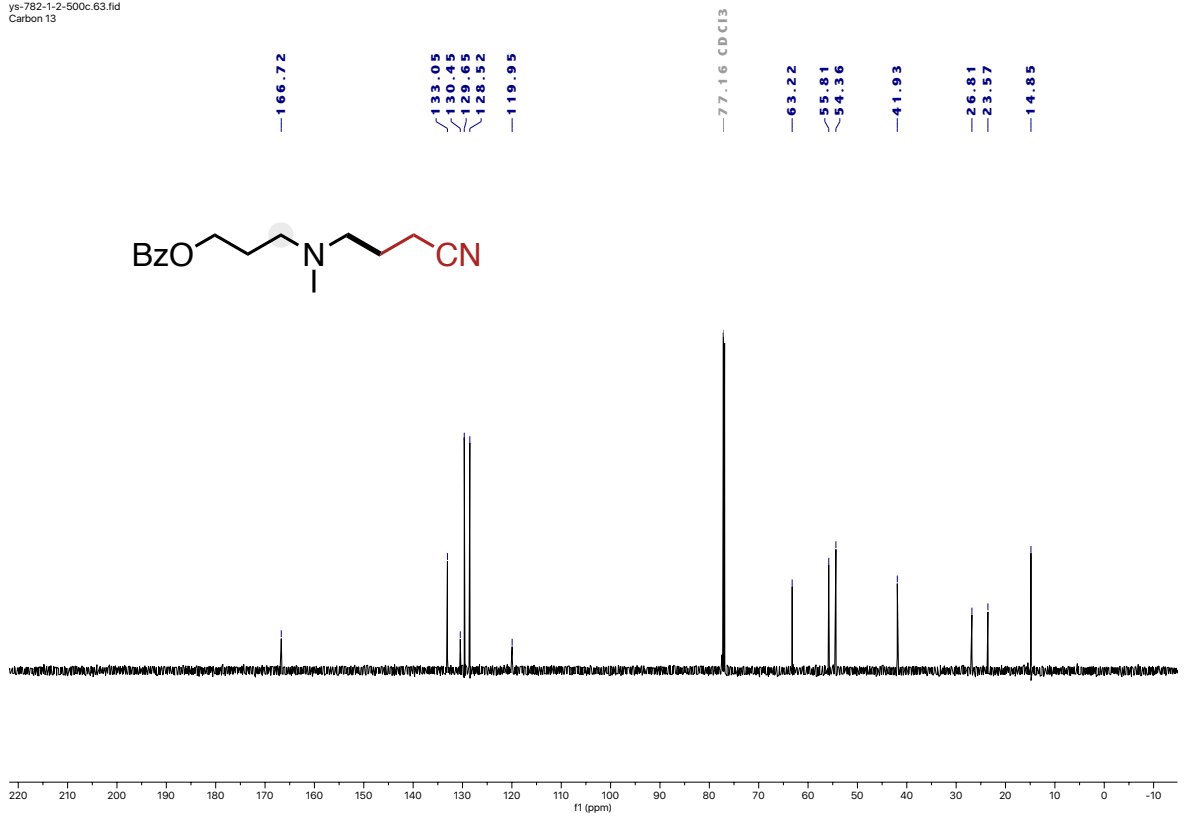

ys-782-3.65.fid  
Proton

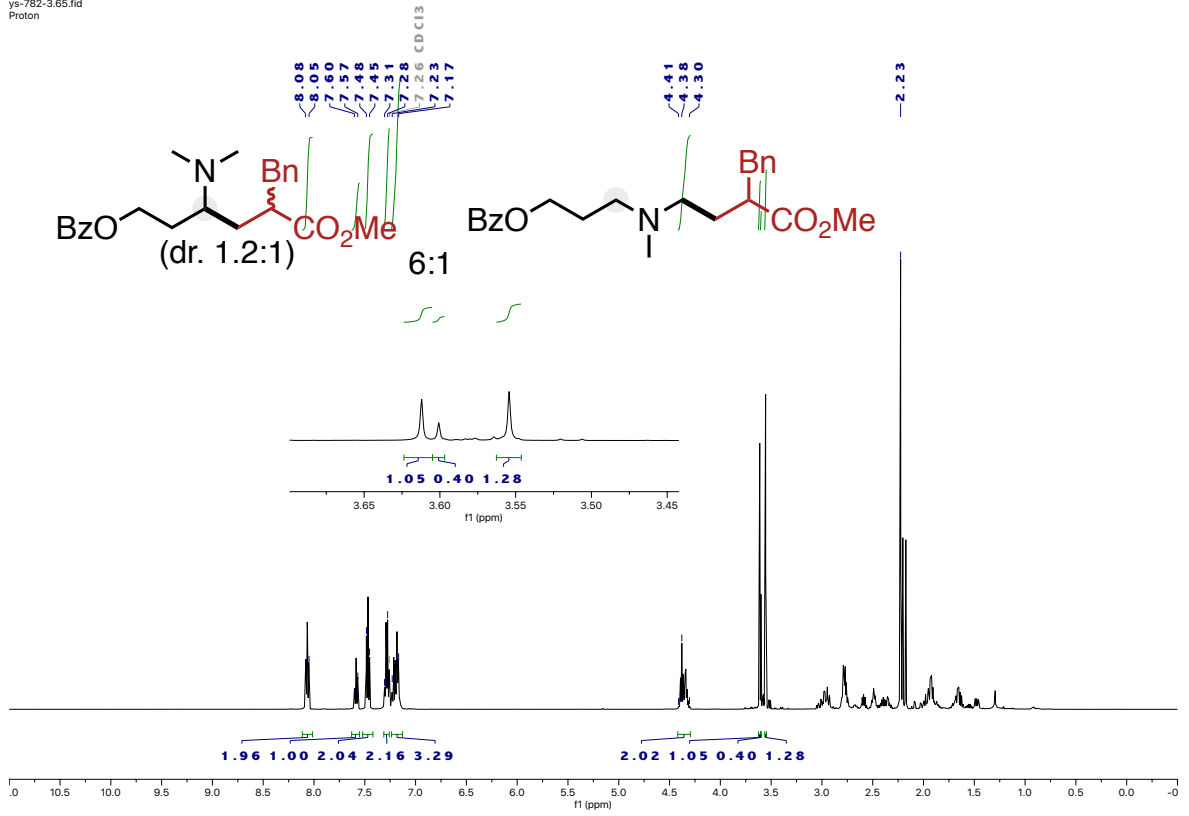

ys-782-3-500c.66.fid  
Carbon 13

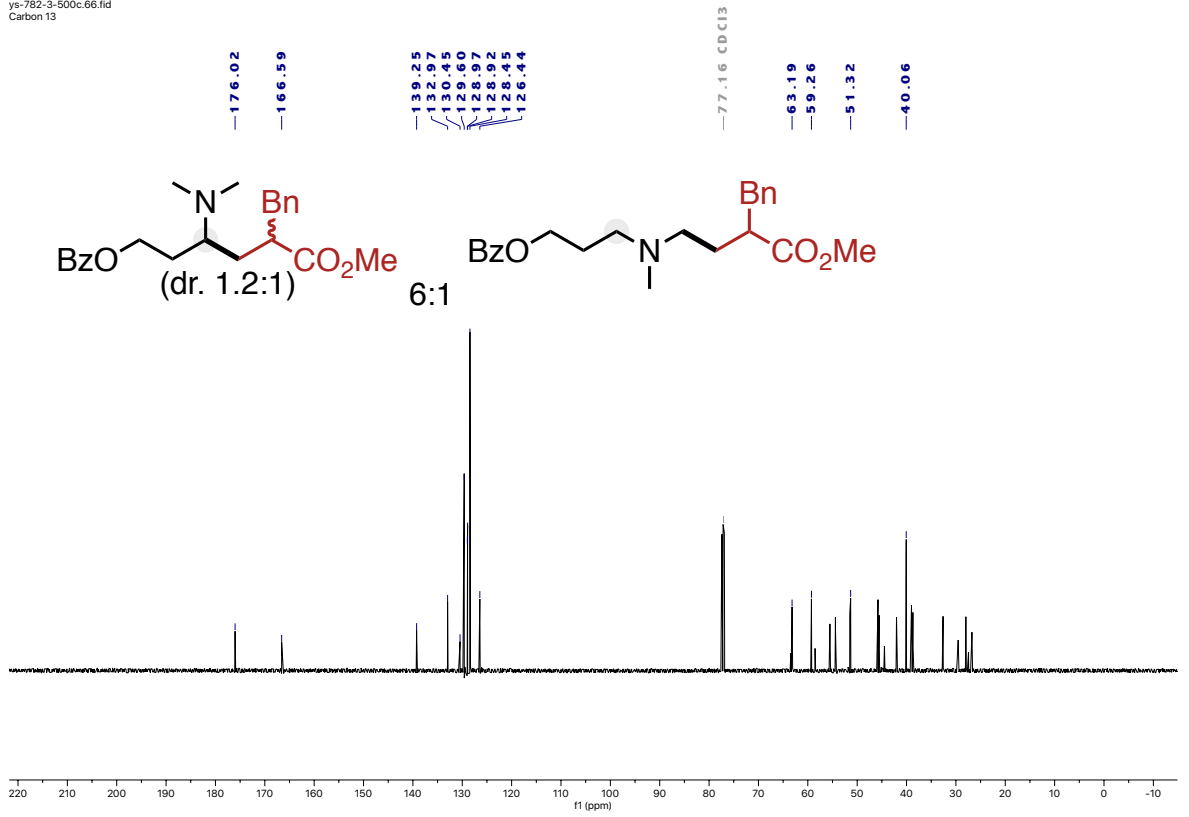

ys-412-2.80.fid  
proton

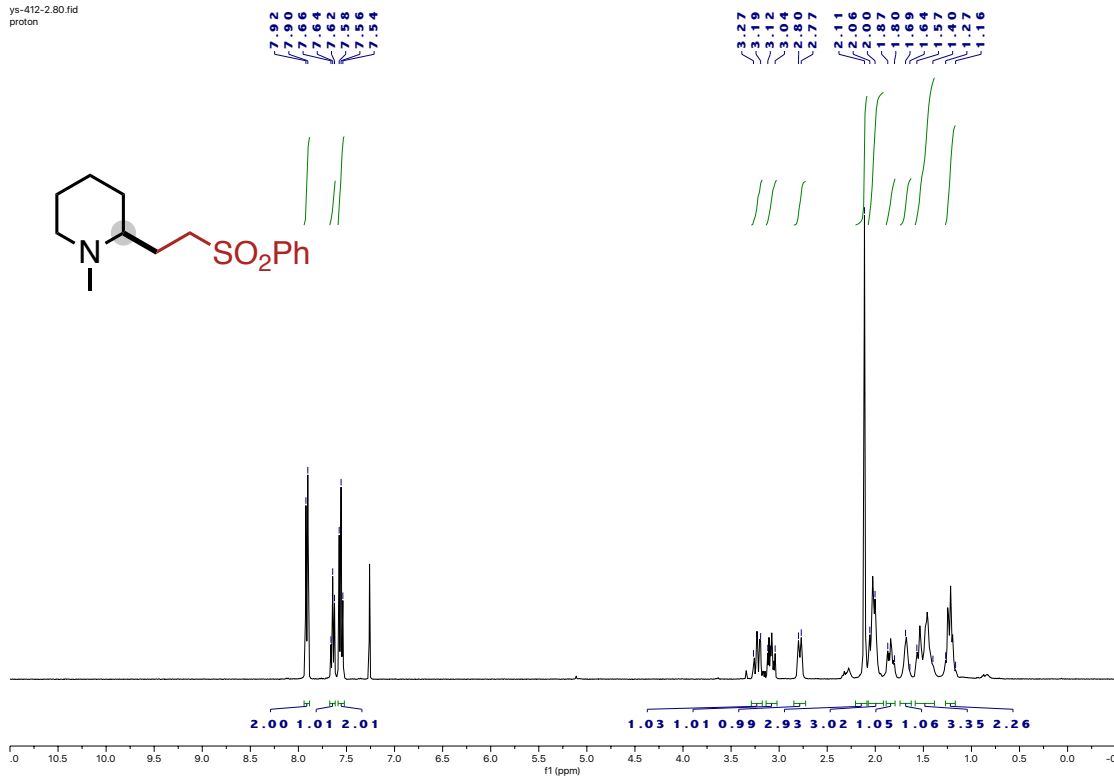

ys-412-2-c13.81.fid

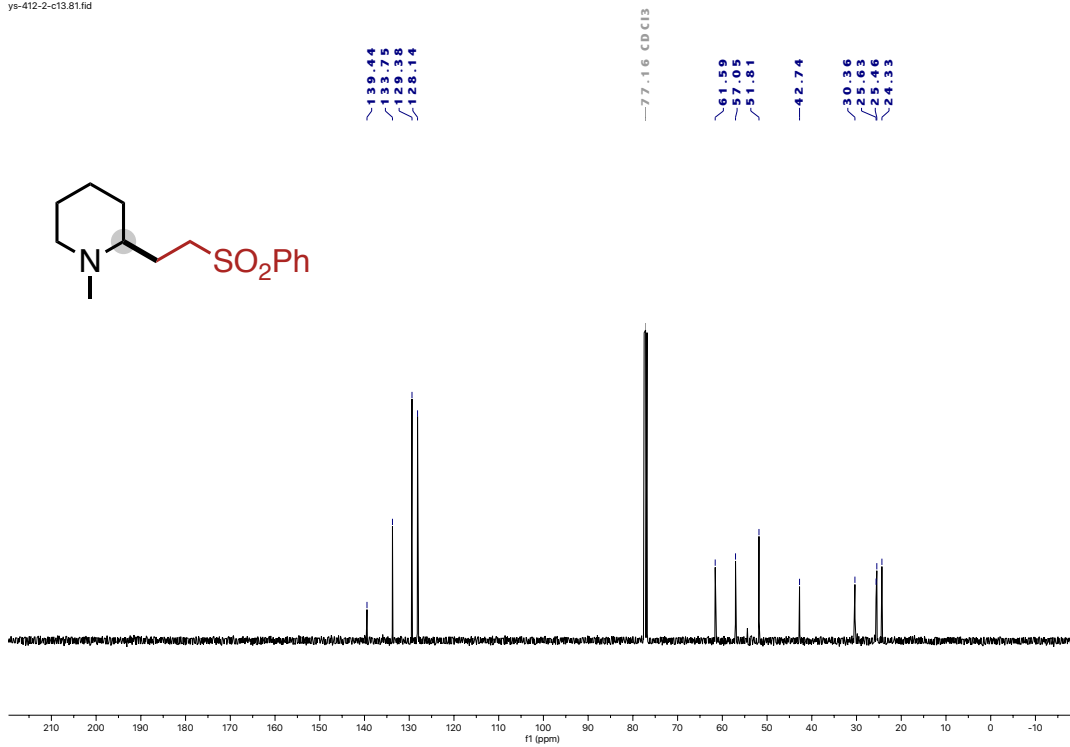



ys-503-1167.fid  
proton

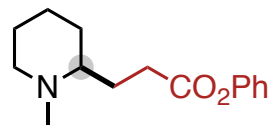

7.39  
7.35  
7.24  
7.20  
7.09  
7.06

3.08  
3.06  
2.79  
2.71  
2.65  
2.39  
2.19  
2.06  
1.97  
1.87  
1.68  
1.51  
1.31

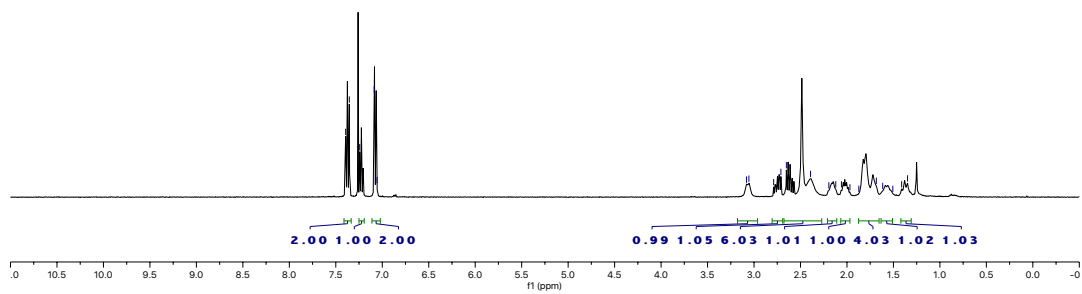

ys-503-1-c13-aaa.173.fid

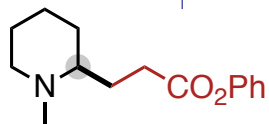

172.05

150.74

129.58

126.02

121.61

-77.16 CDCl3

63.16

56.72

41.95

29.98

29.16

26.81

24.47

23.46

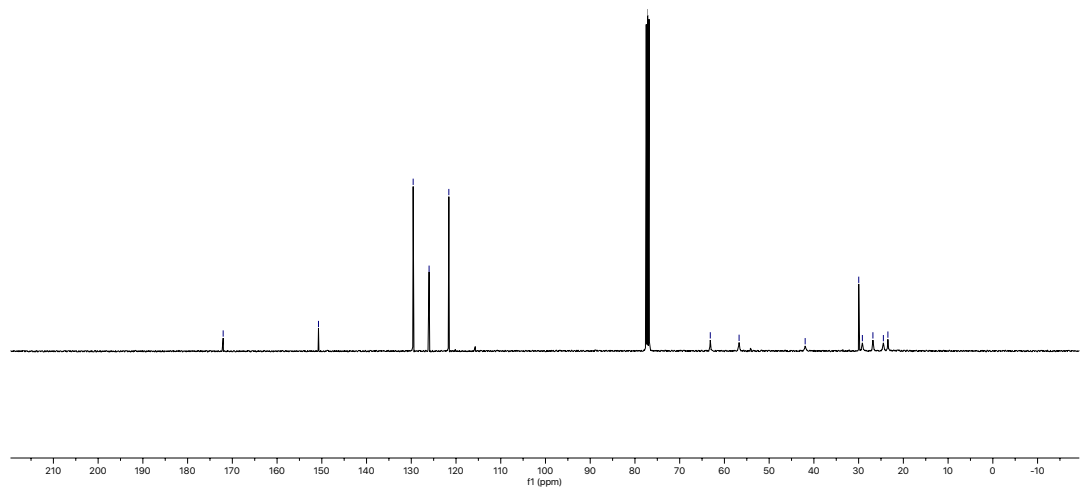

ys-503-2-2.175.fid  
proton

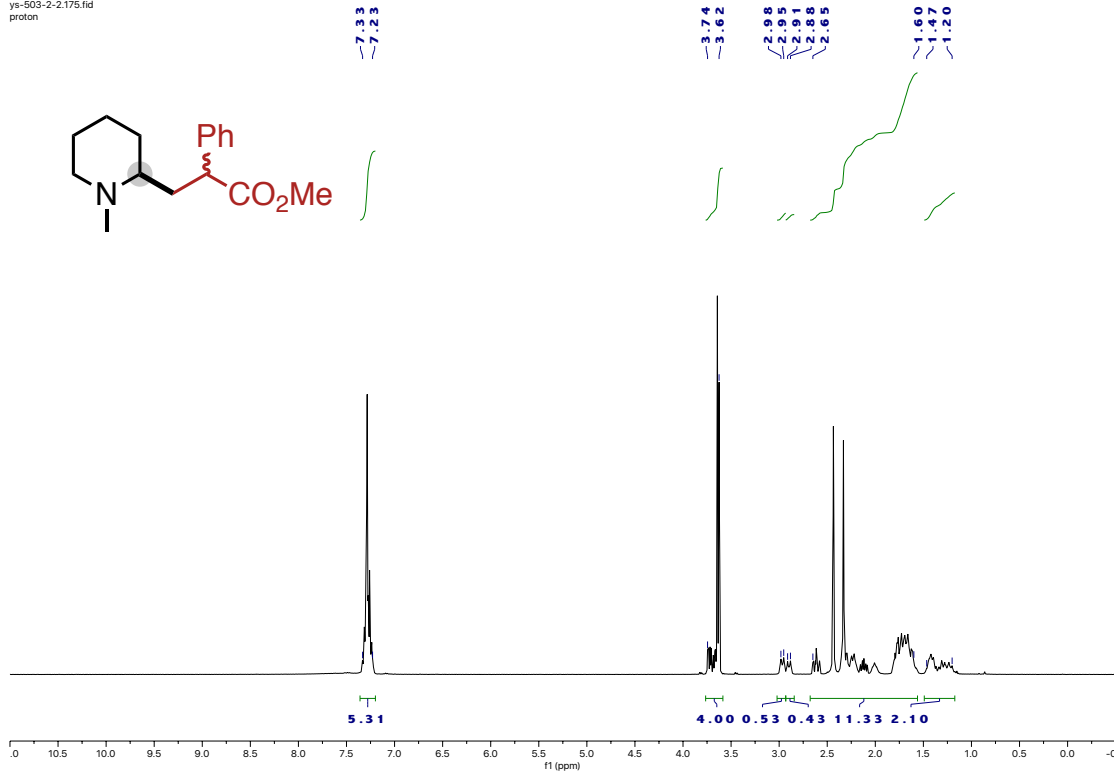

ys-503-2-2-c13.176.fid

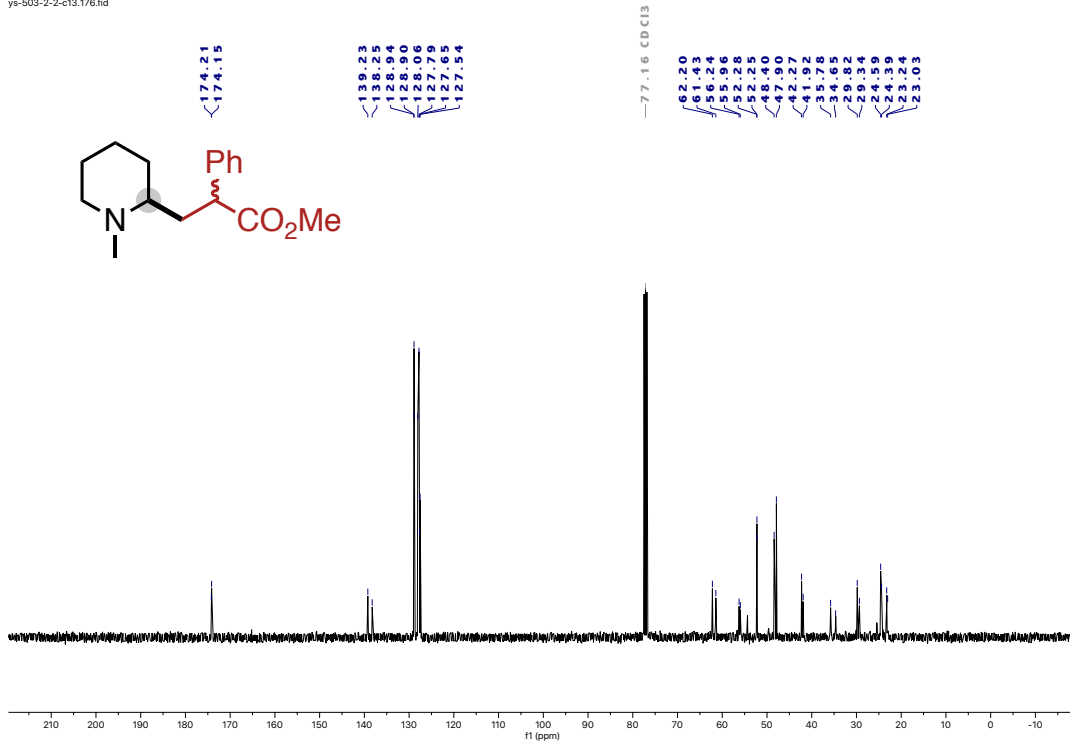

ys-503-3-2.178.fid  
proton

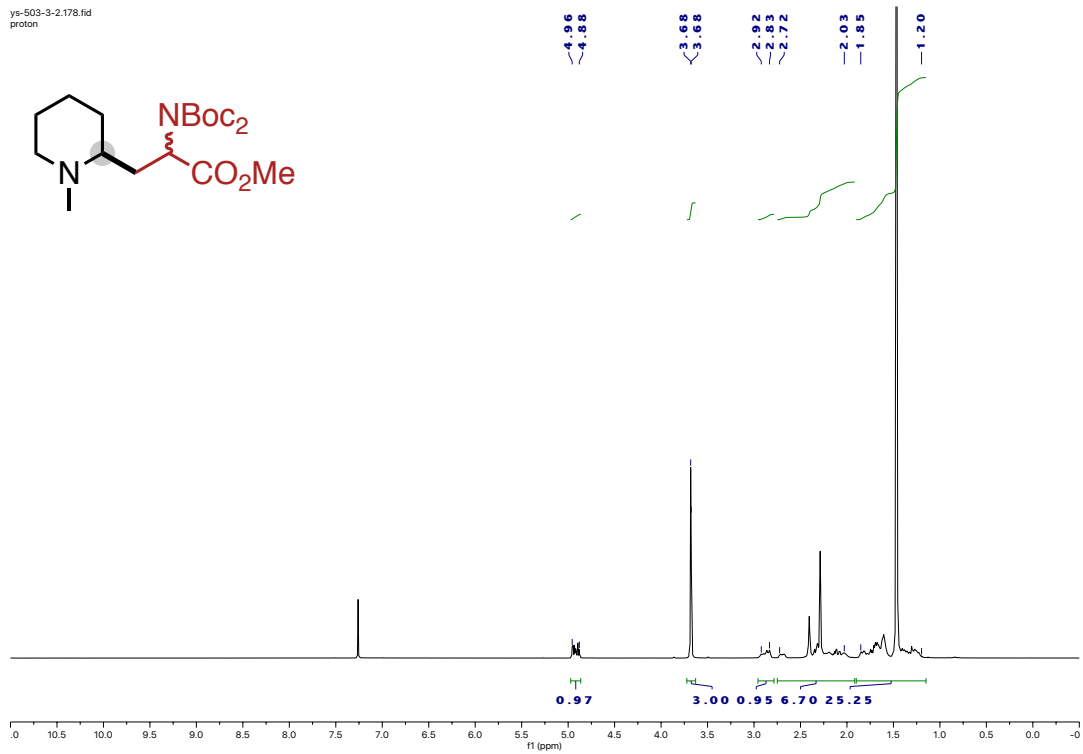

ys-503-3-2-c13.179.fid

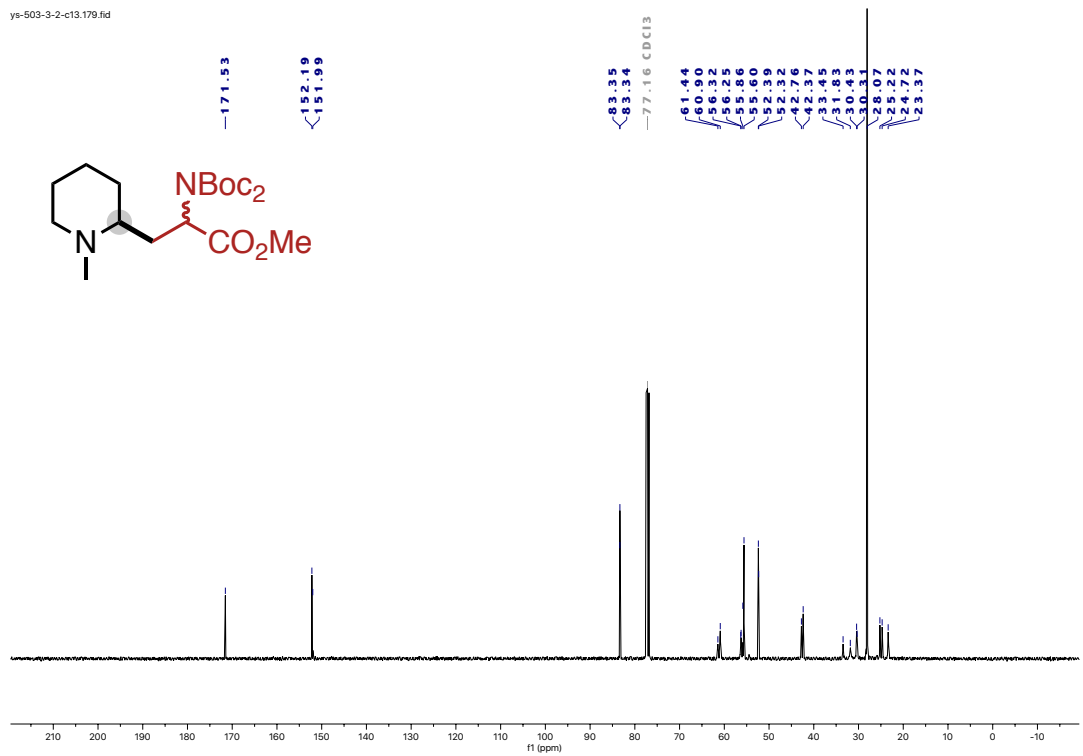

ys-508-2.162.fid  
proton

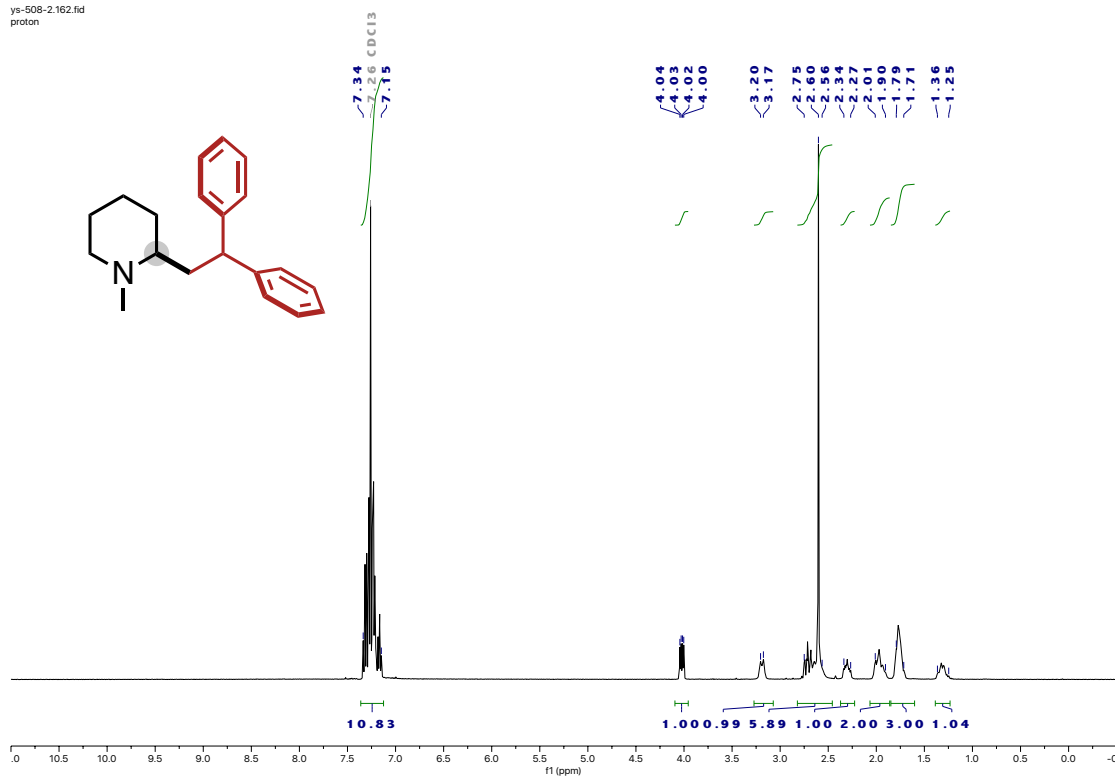

ys-508-2-c13.166.fid

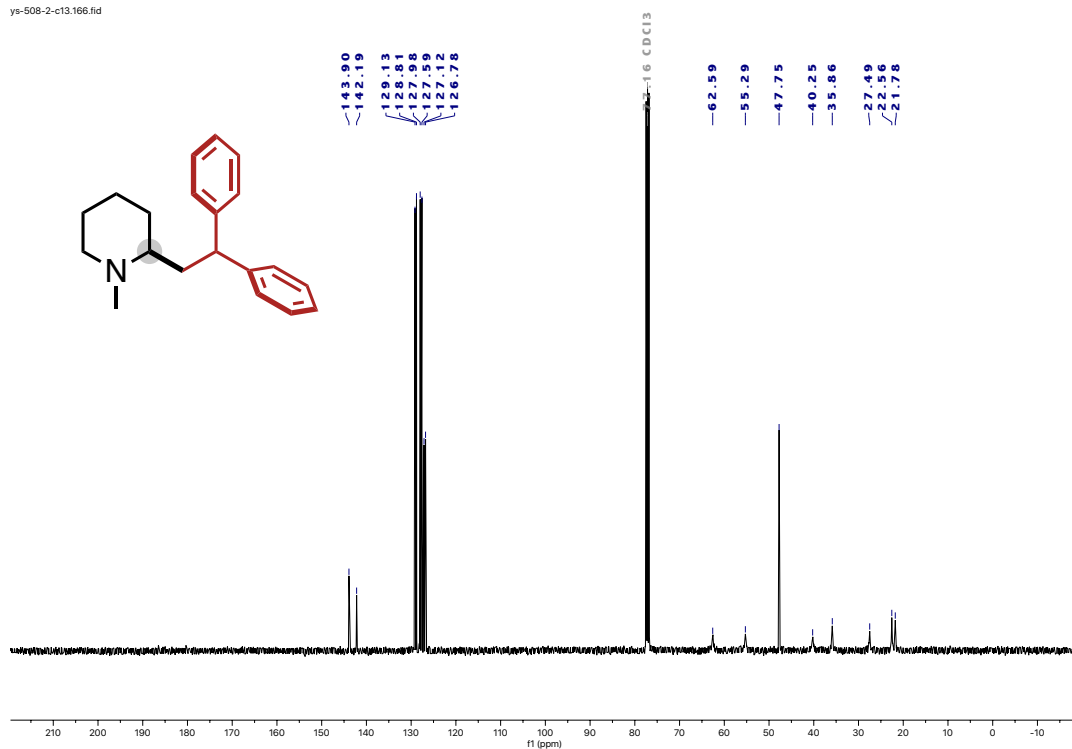

ys-388-pure-a-68.fid

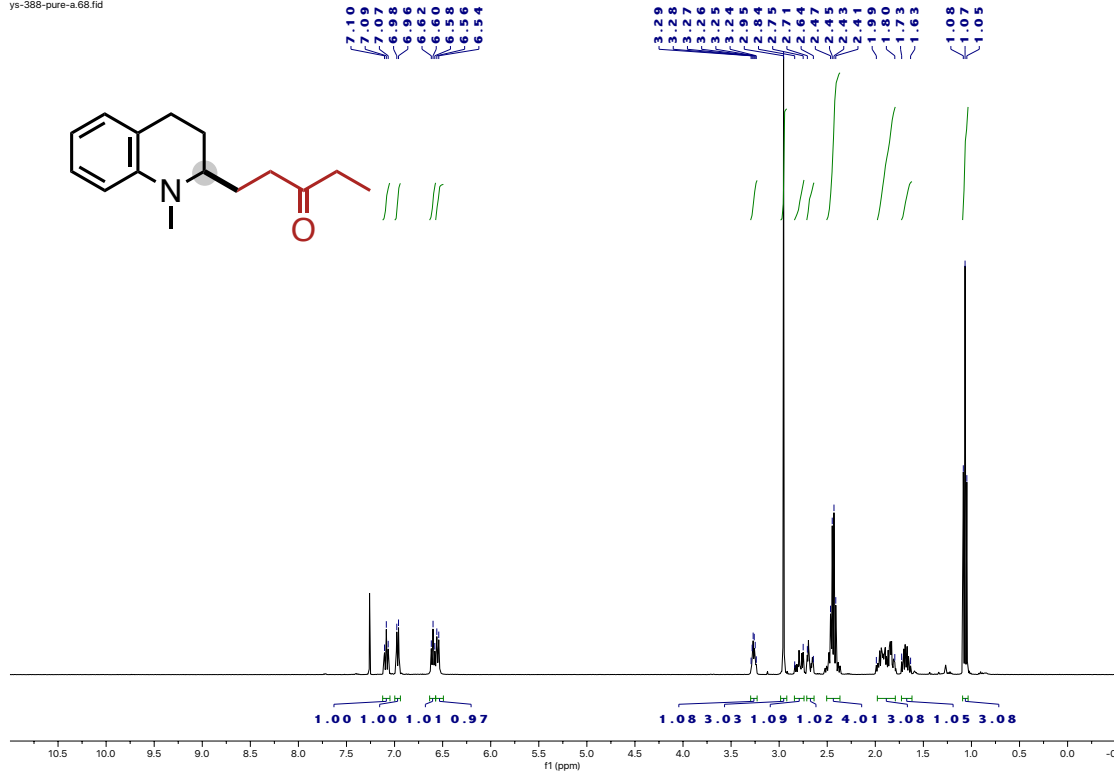

ys-388-pure-a-c13.69.fid

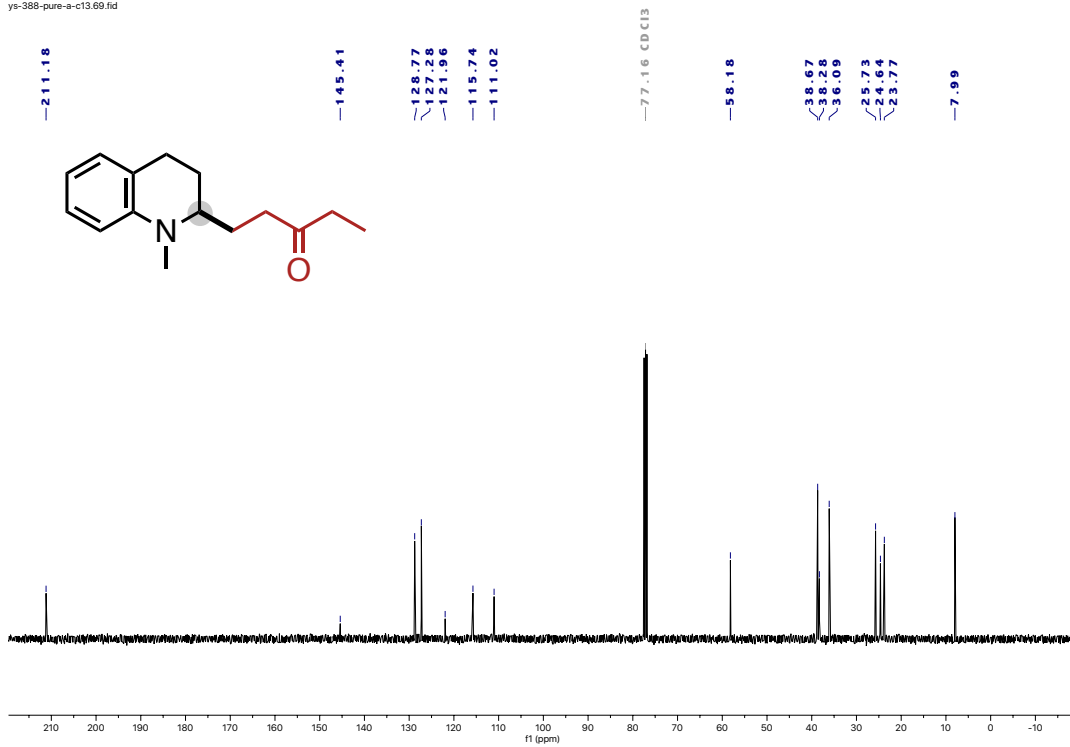

ys-665-1.337.fid

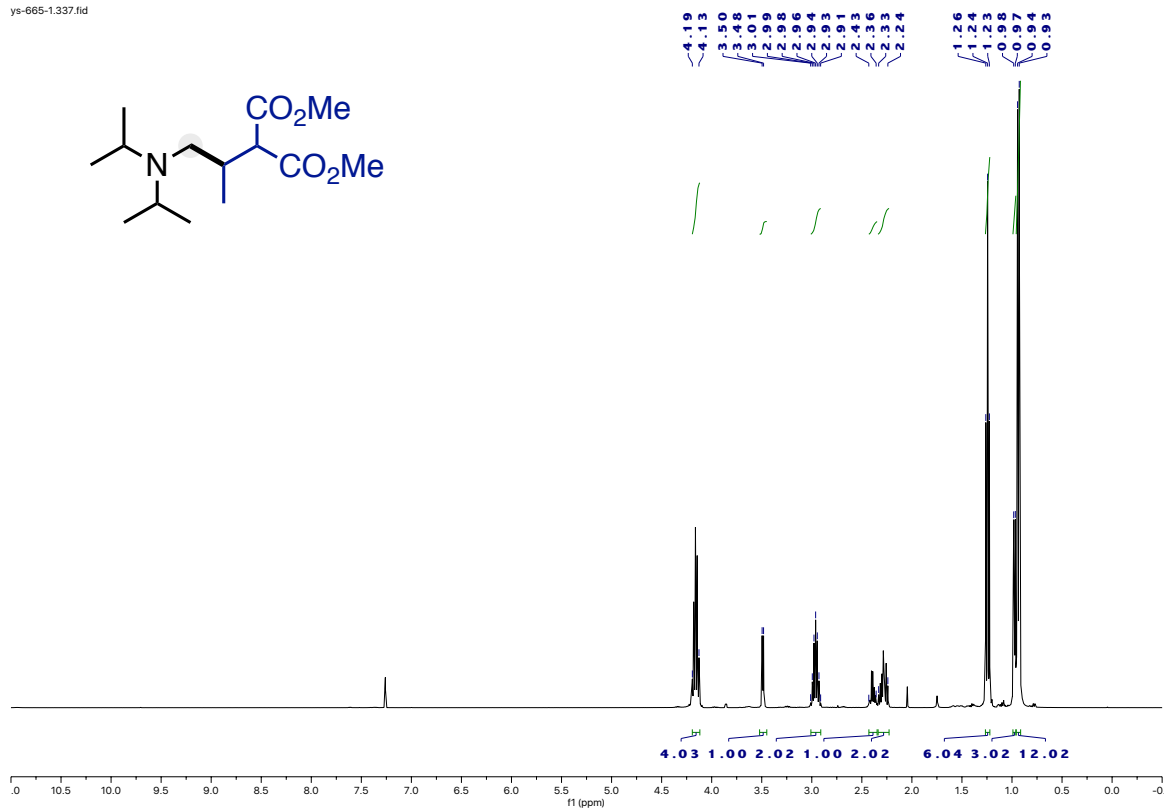

ys-665-1-c13.336.fid  
carbon 13

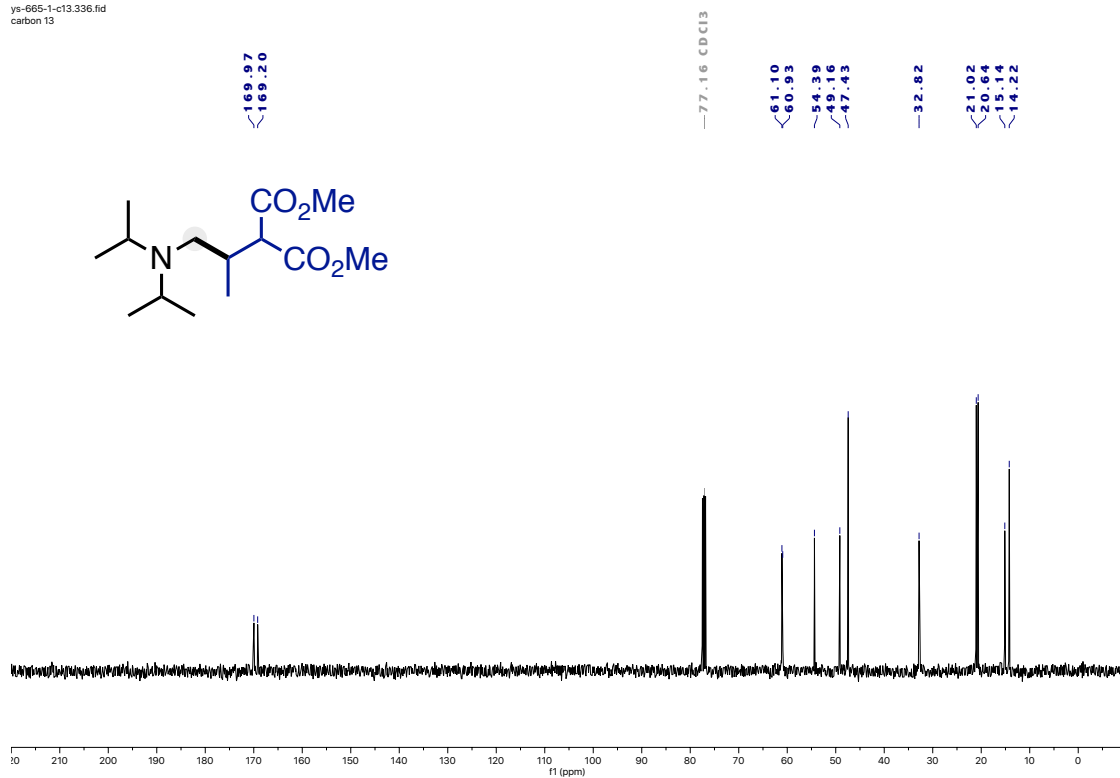

ys-549.295.fid

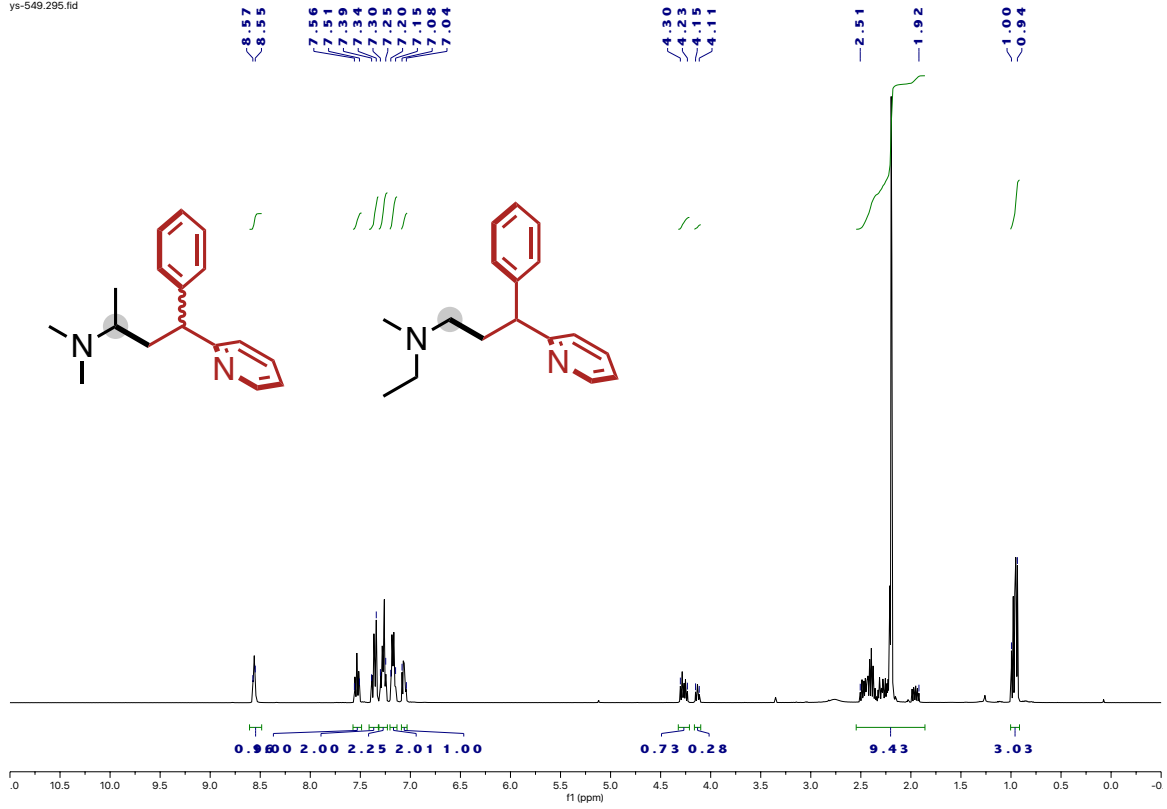

ys-551-3-c13.303.fid  
carbon 13

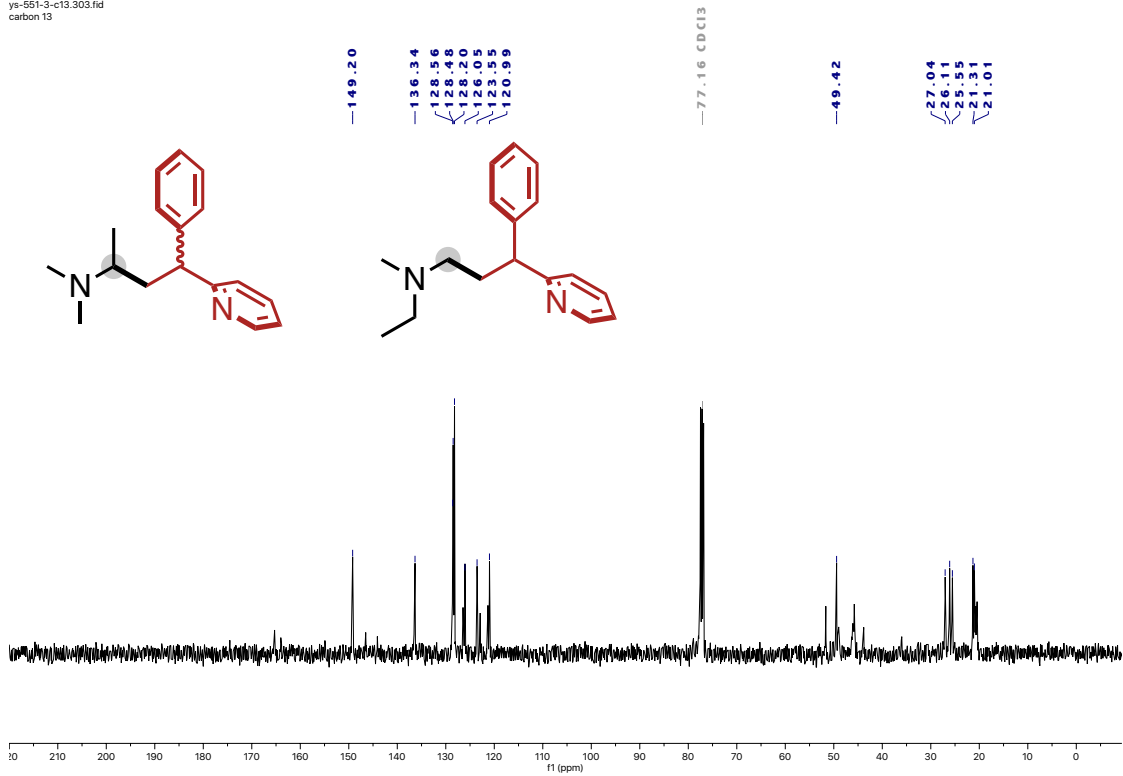

ys-565a.207.fid  
proton

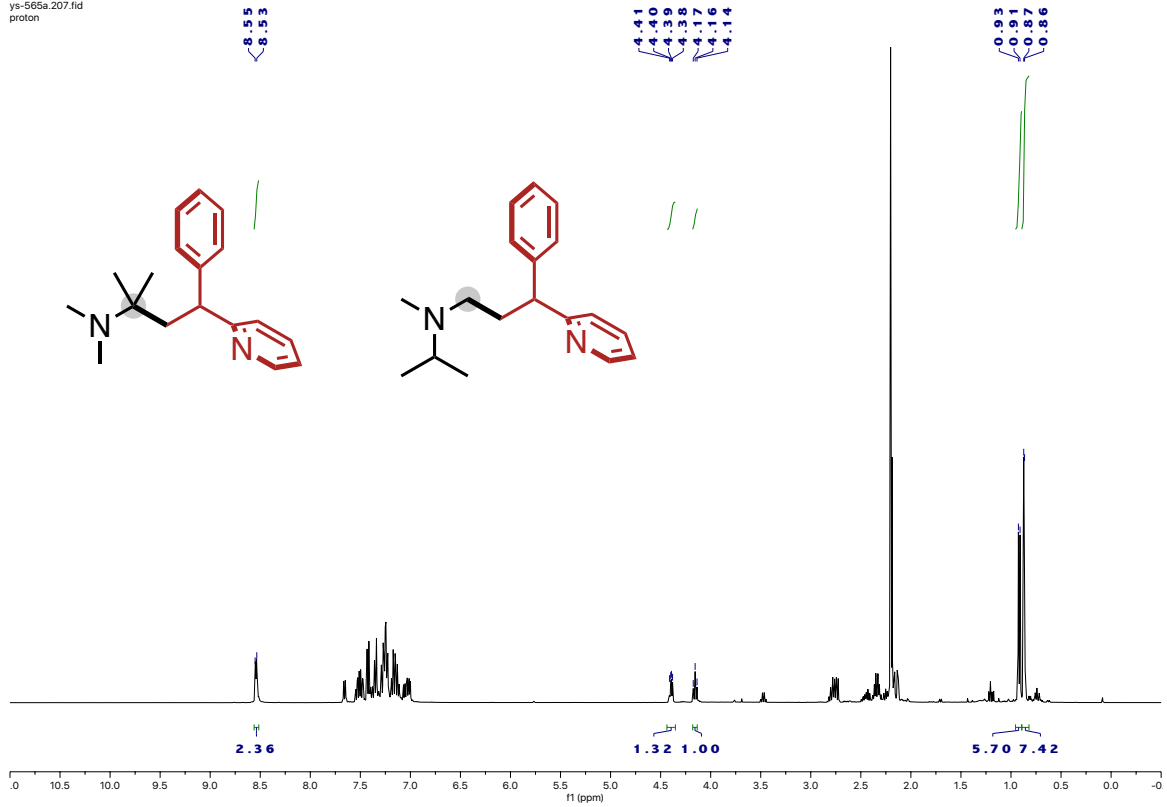

ys-565a-c13.210.fid

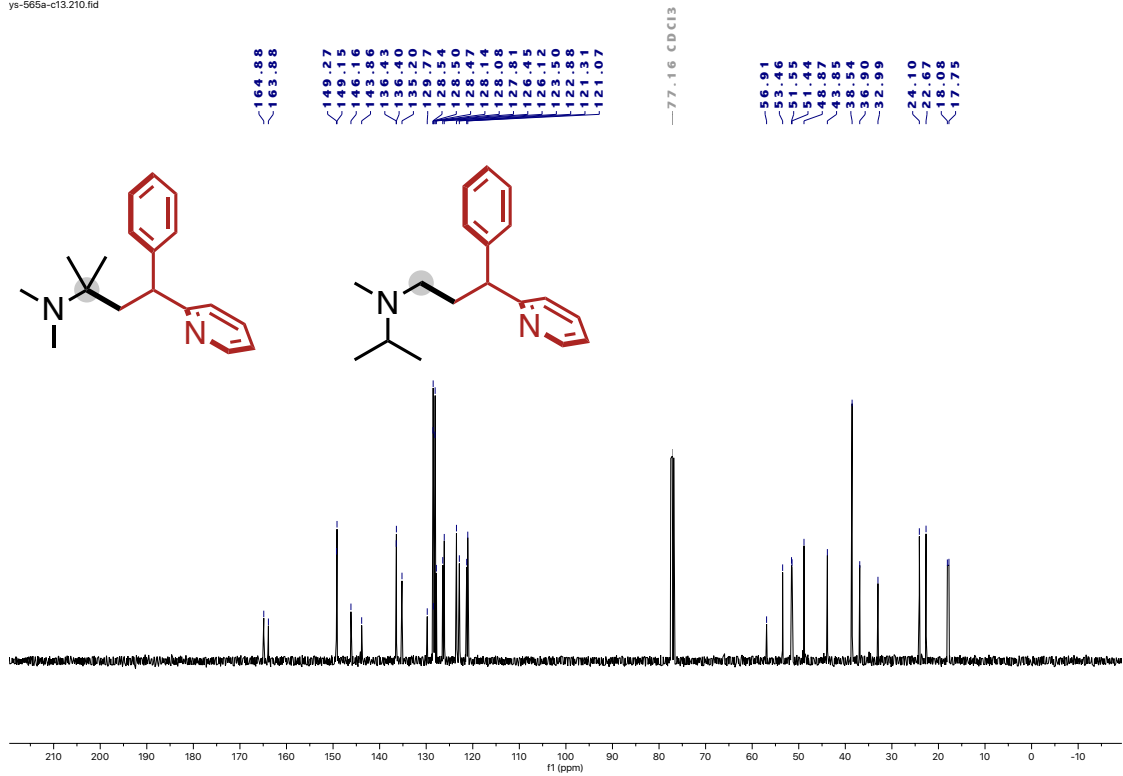



ys-551-3.298.fid

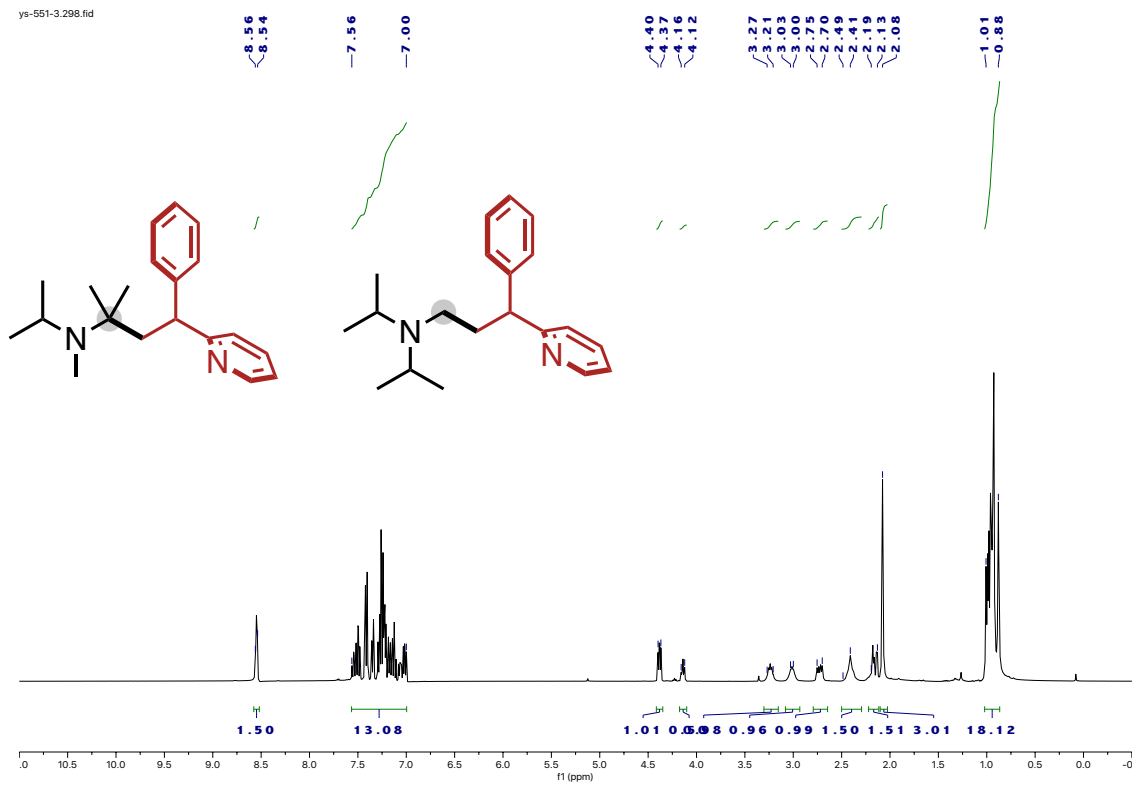

ys-531-3-c13.303.fid  
carbon 13

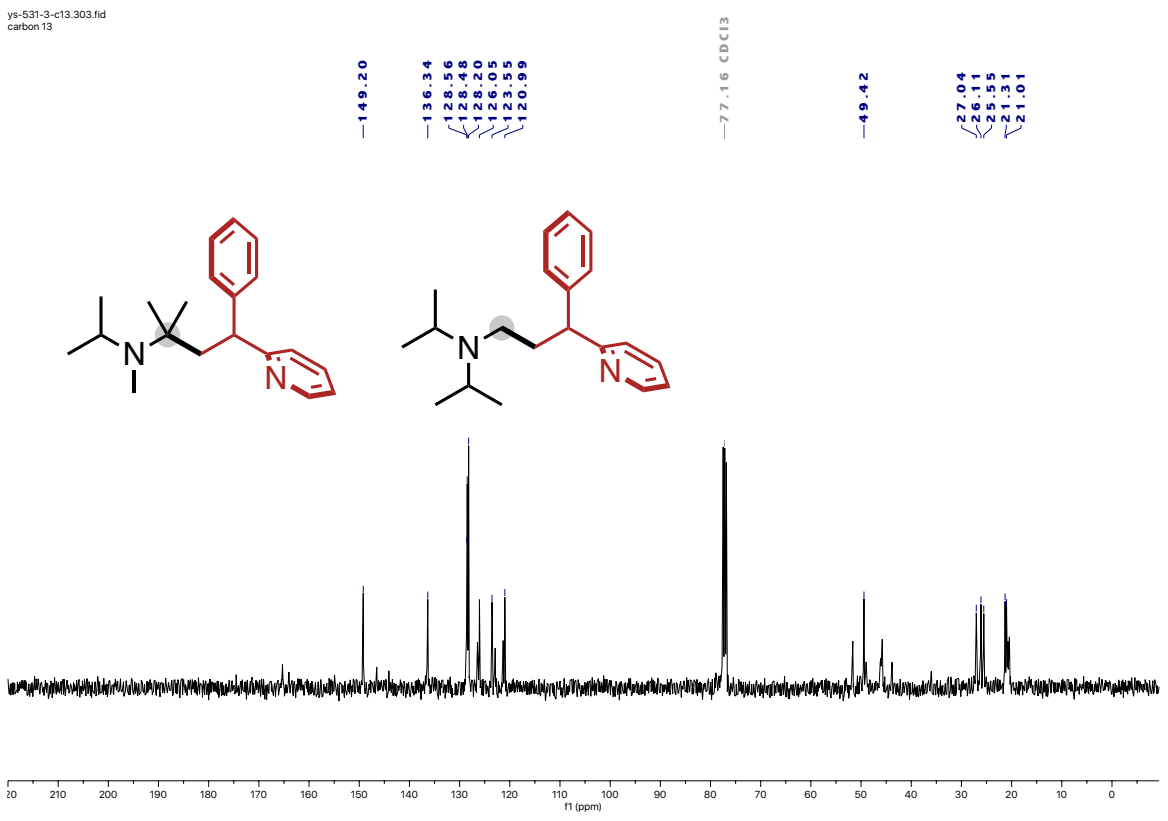

ys-567a.206.fid  
proton

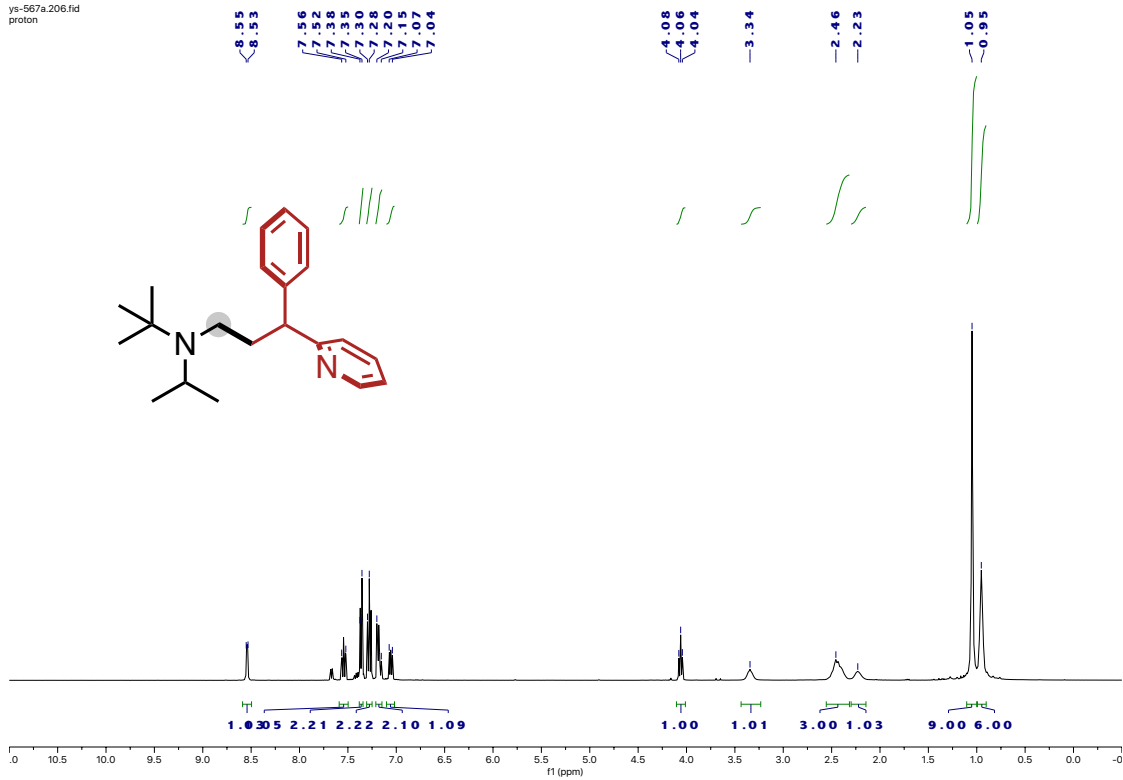

ys-567a-c13.209.fid

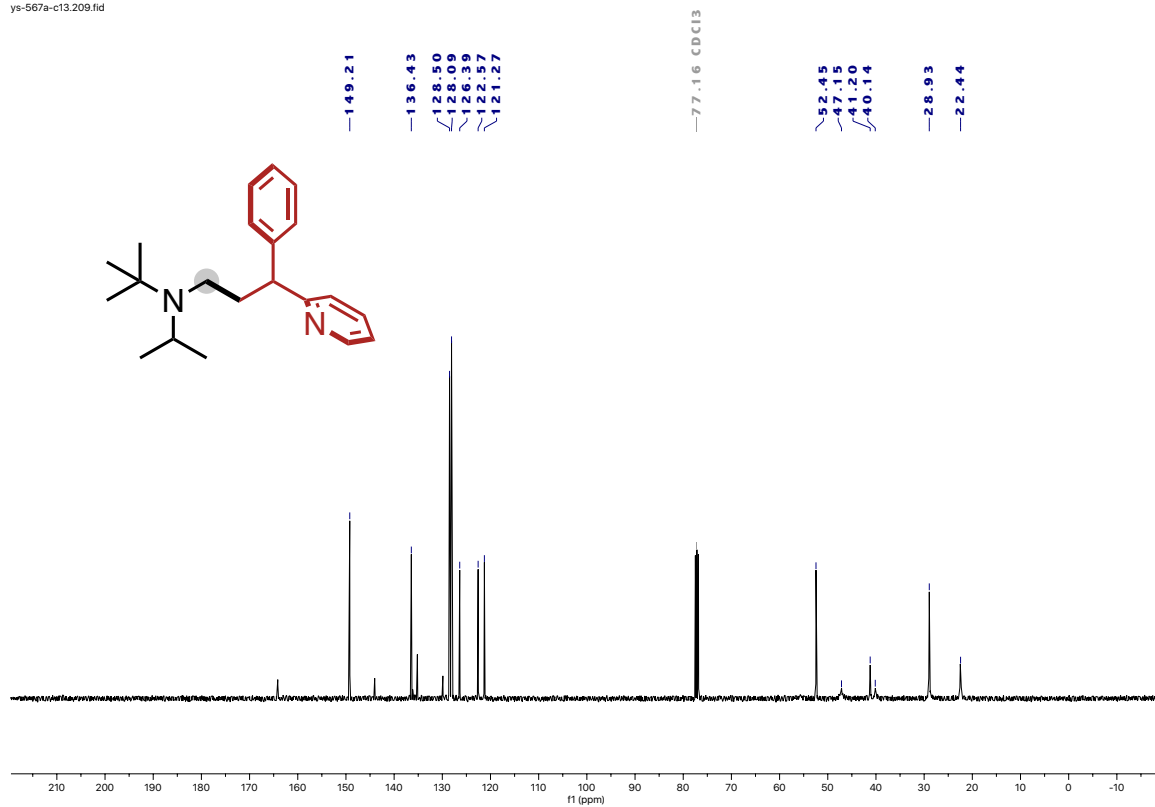

ys-539.257.fid

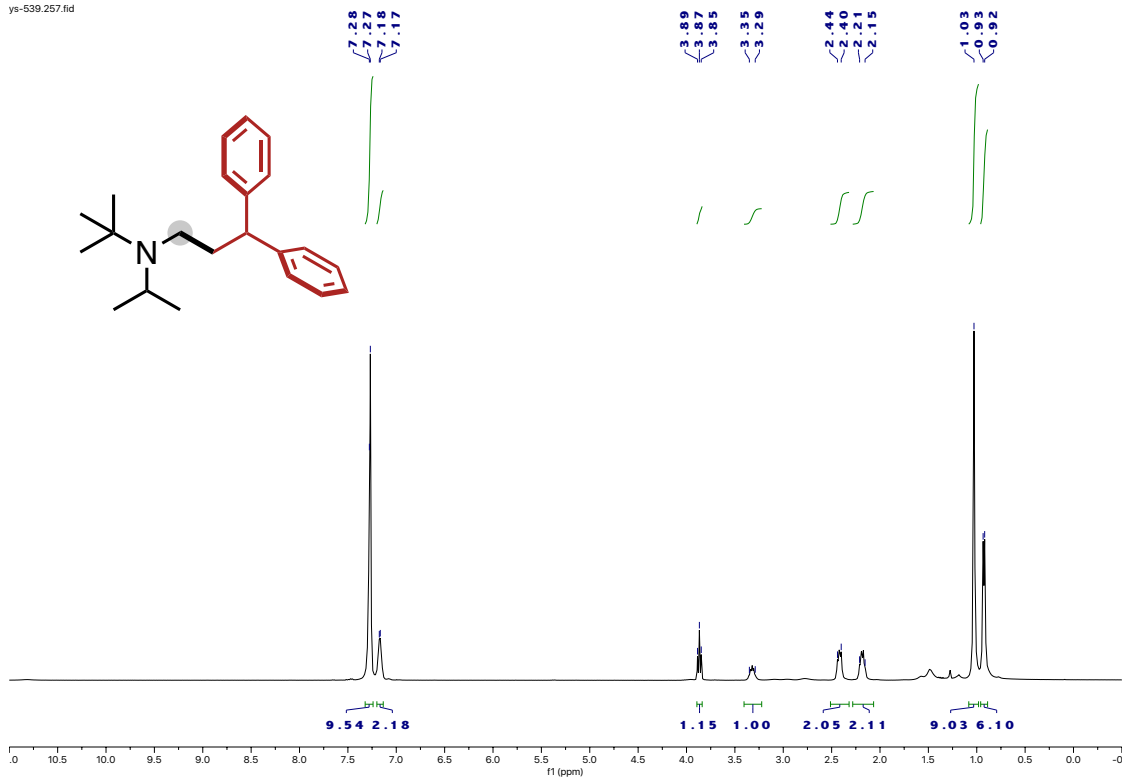

ys-539-c13.262.fid  
carbon 13

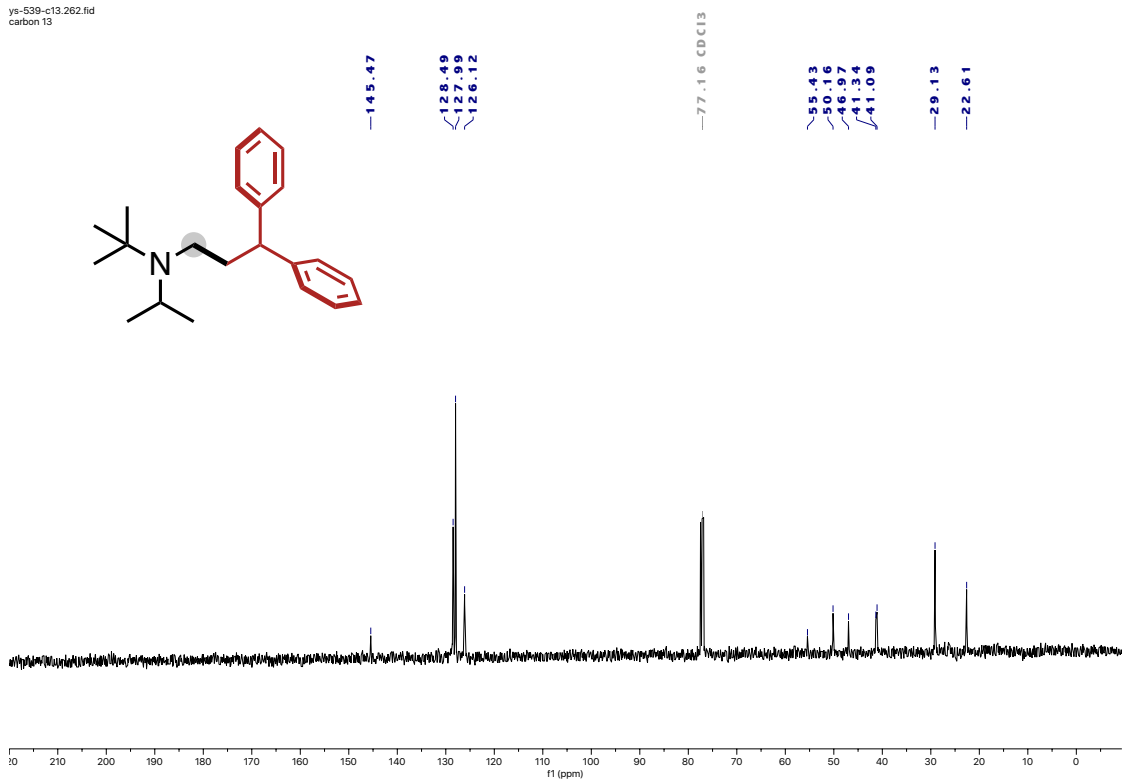

ys-574-a.304.fid

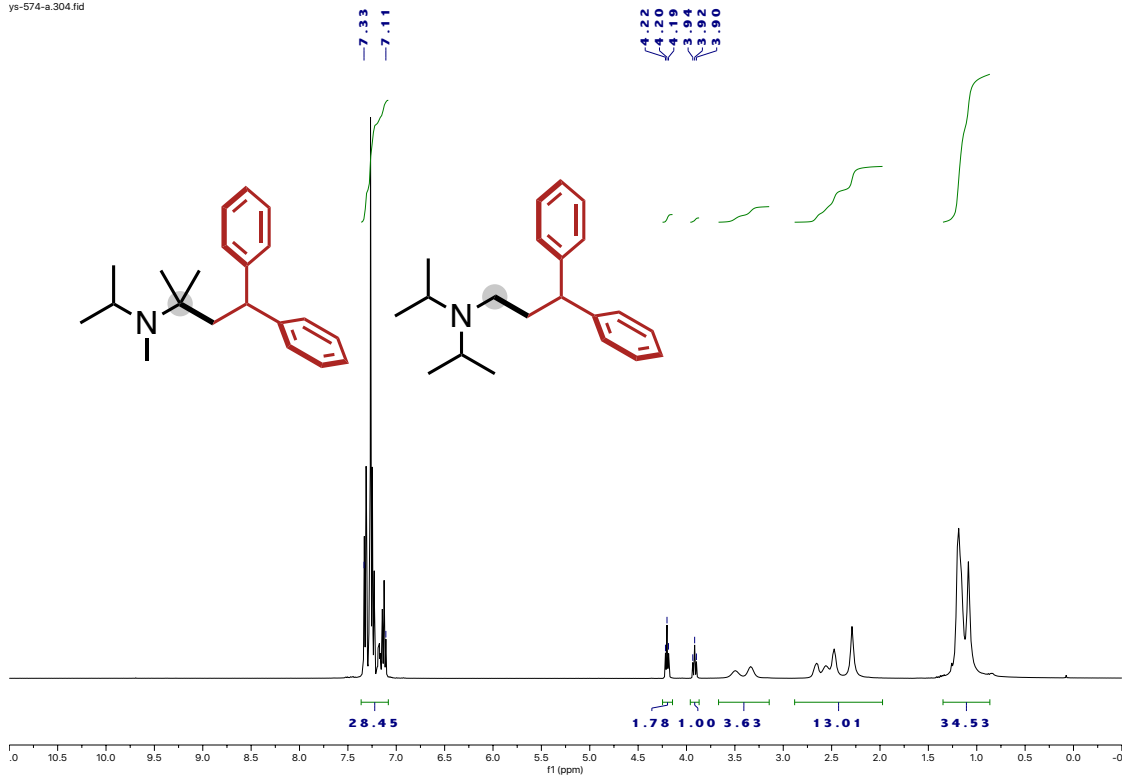

ys-574-a-c13.308.fid  
carbon 13

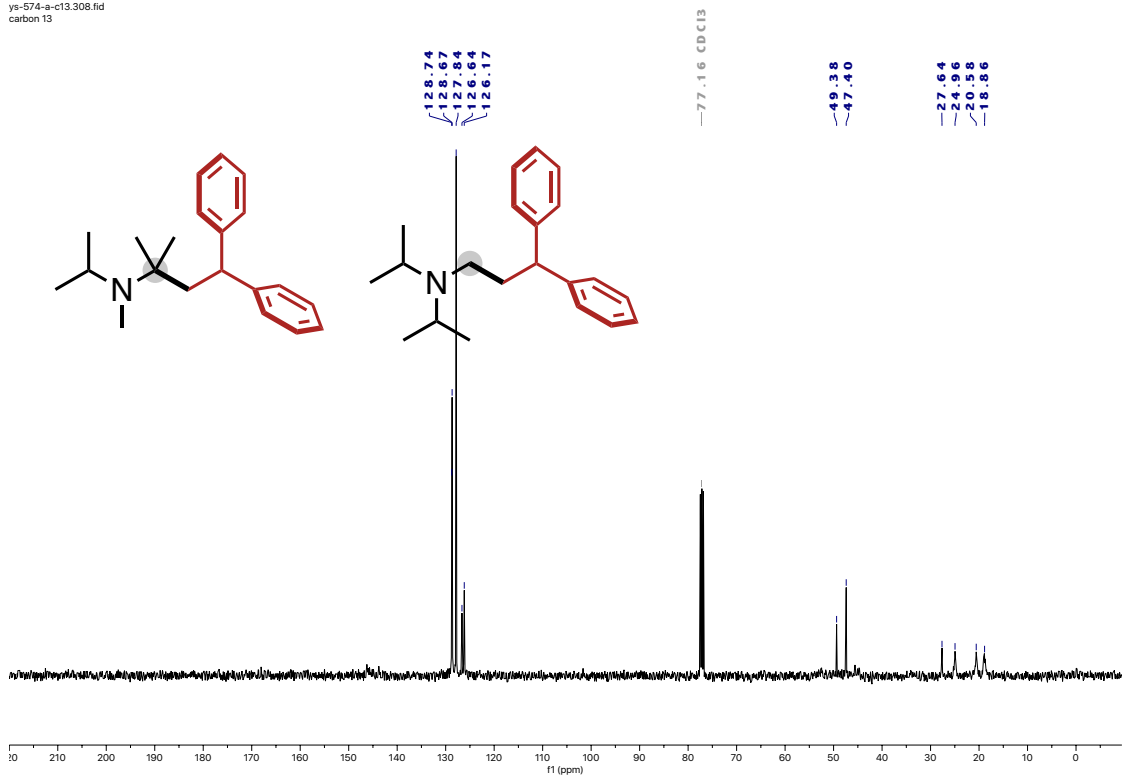

ys-540-2.259.fid

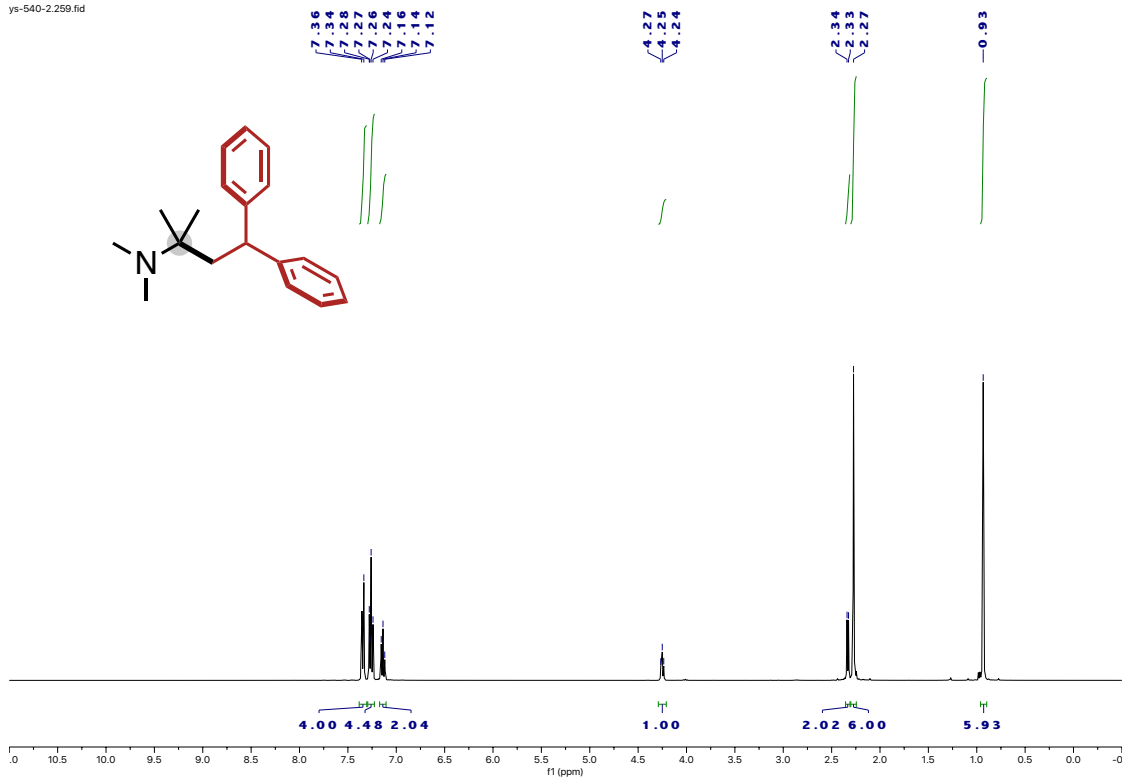

ys-540-2-c13.260.fid  
carbon 13

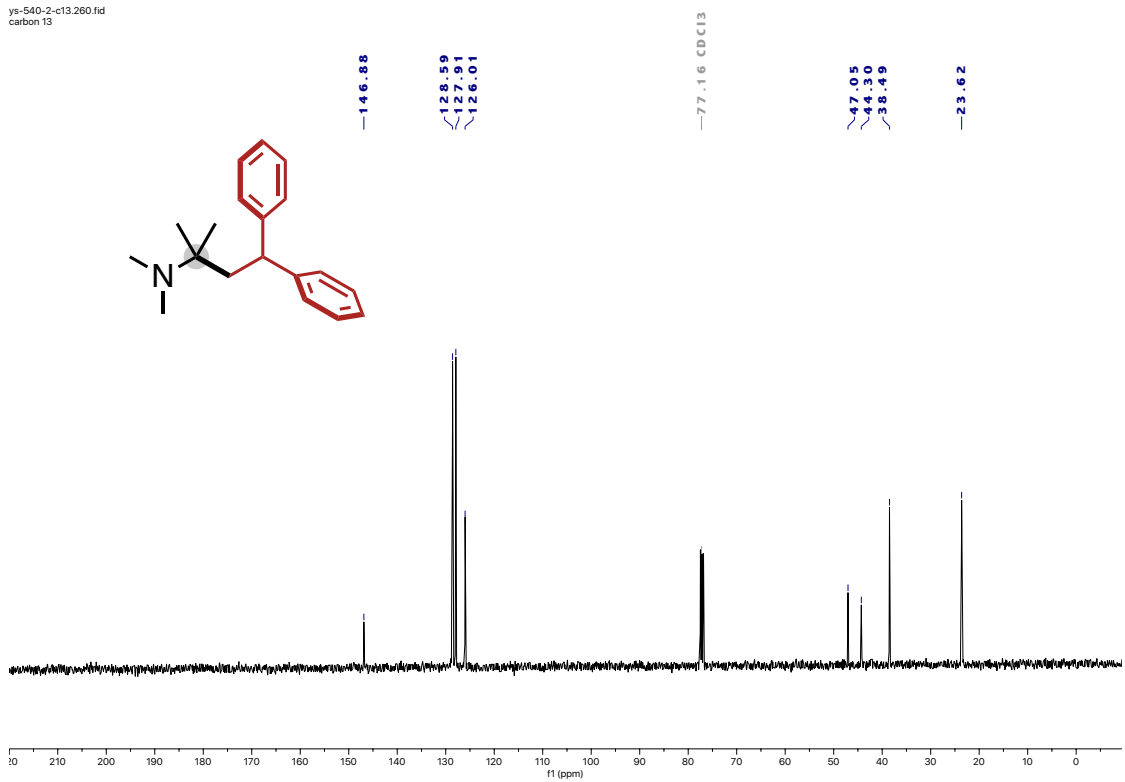

ys-540-1.258.fid

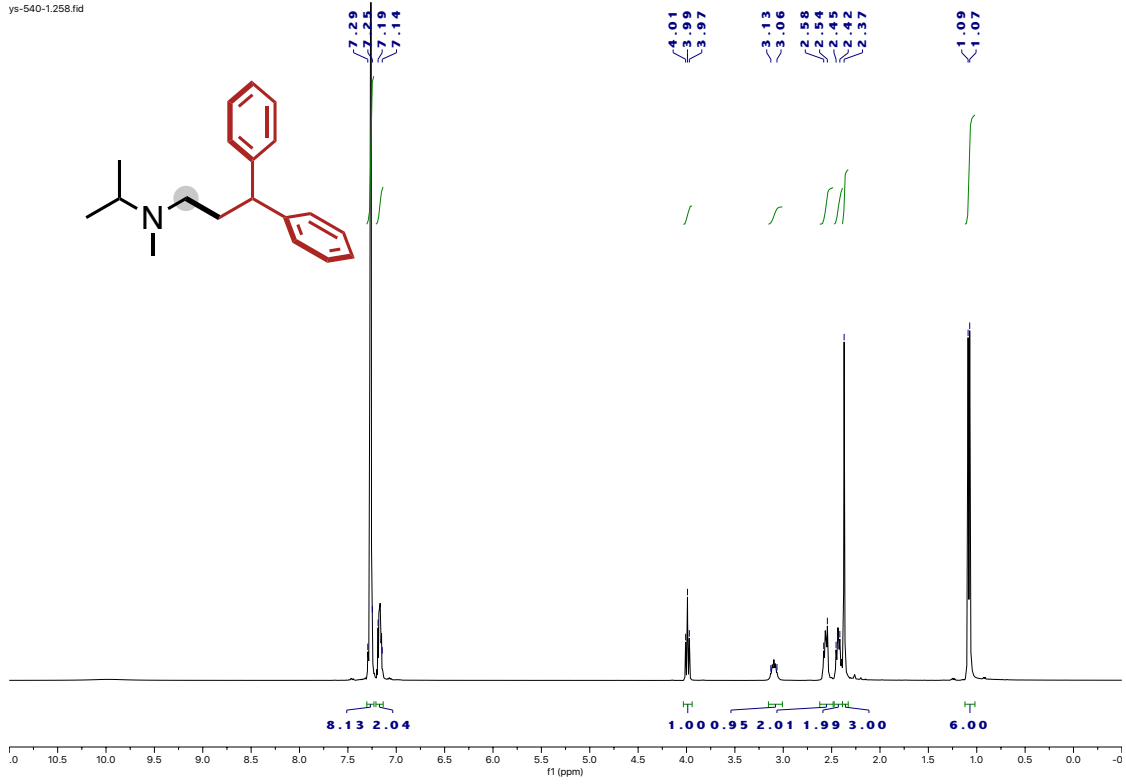

ys-540-1-c13.261.fid  
carbon 13

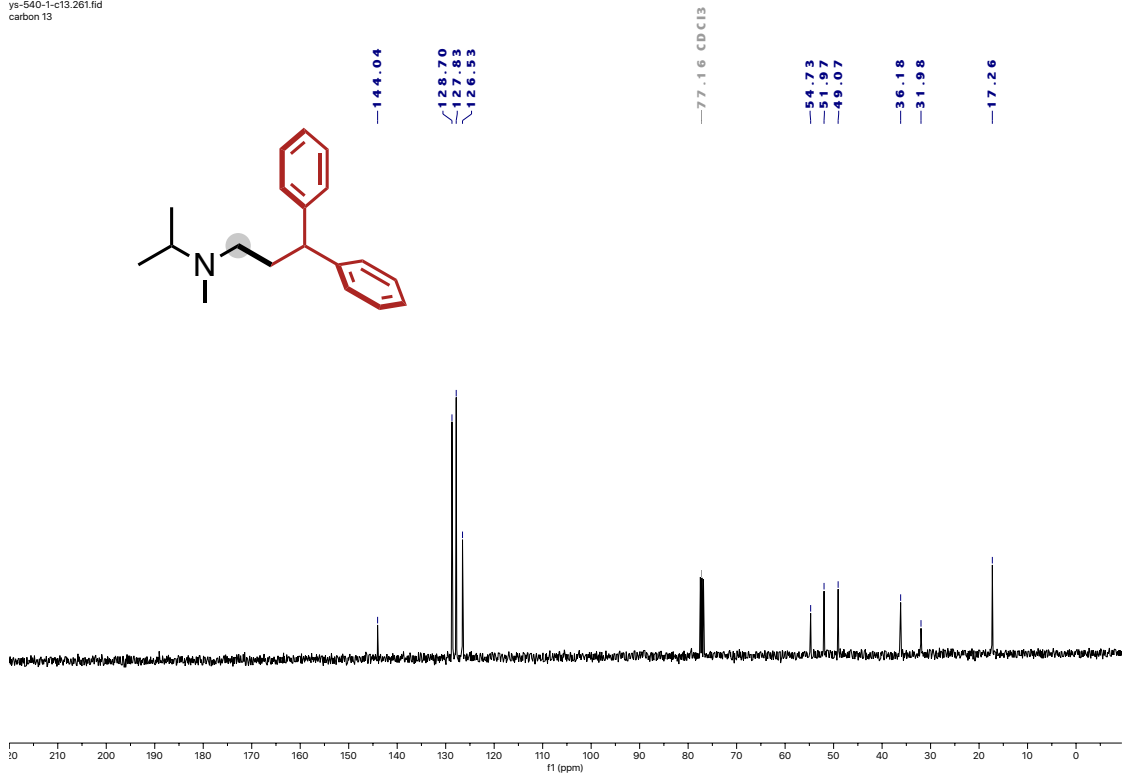

ys-365-2195.fid

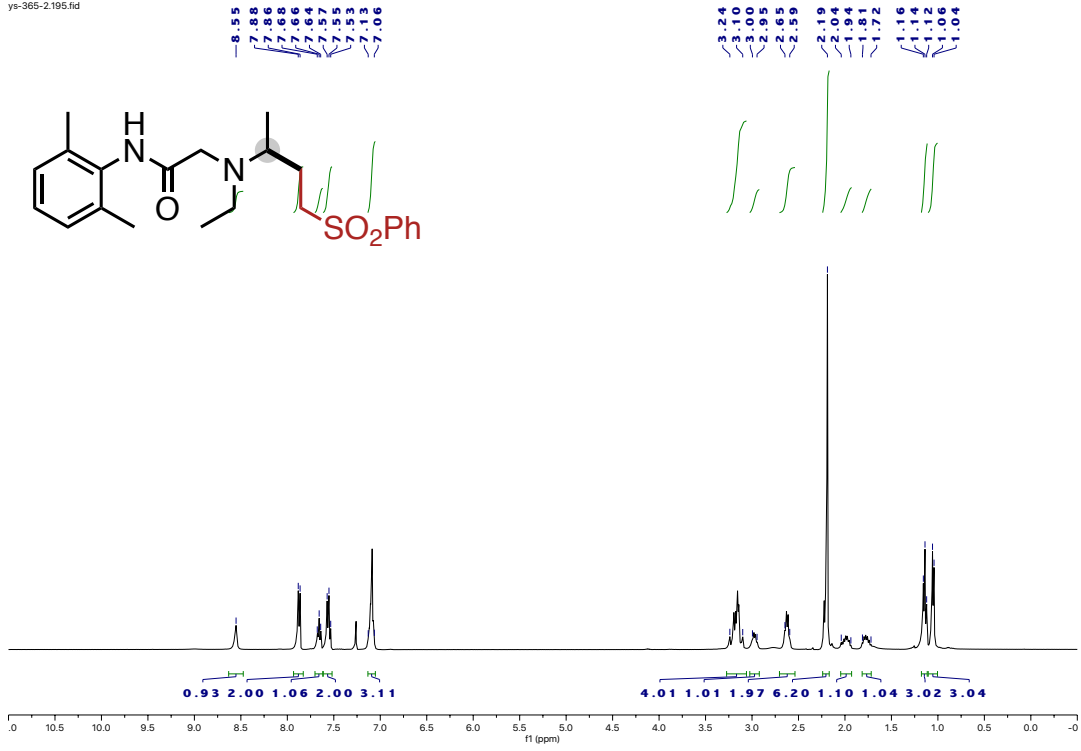

ys-365-2-c13.197.fid  
Carbon 13

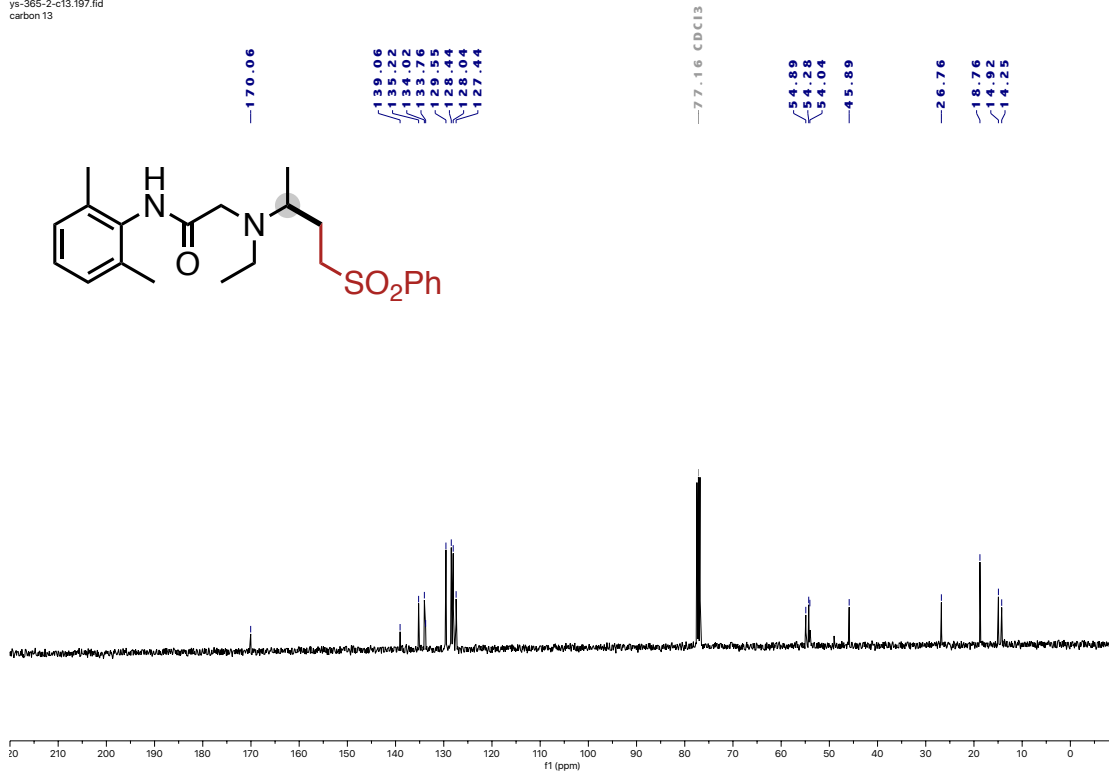

ys-467-1.128.fid  
proton

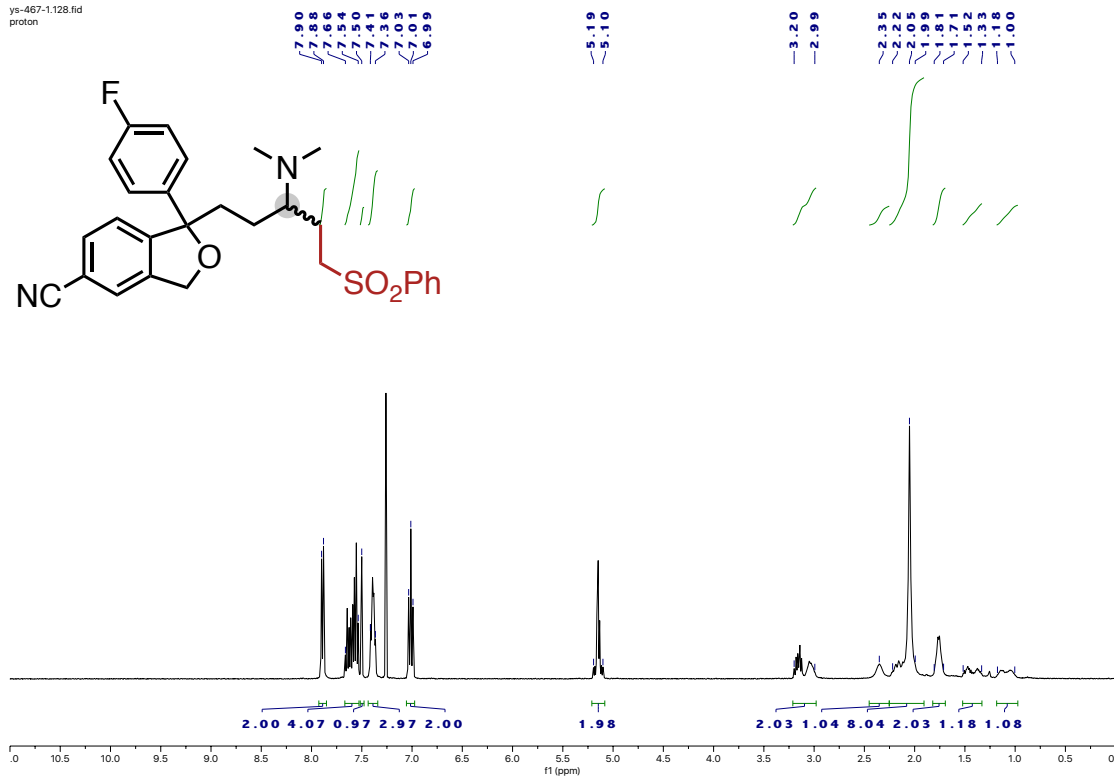

ys-467-1-c13-again.133.fid

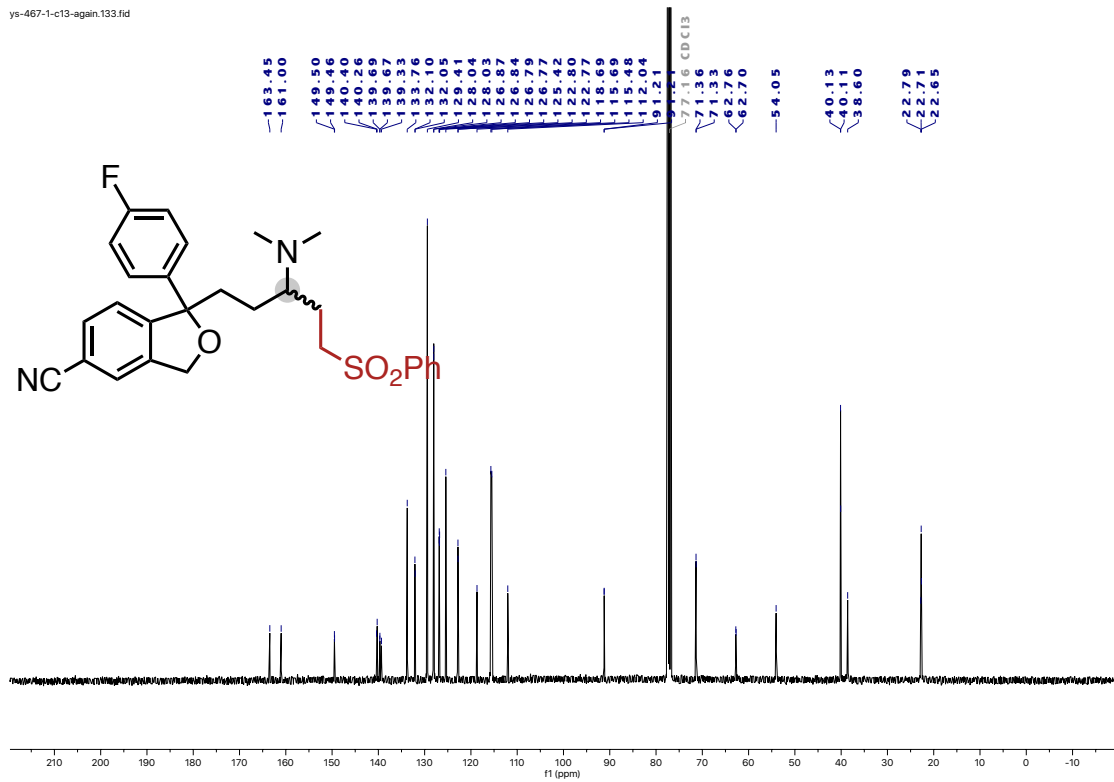



ys-467-f.240.fid  
F19

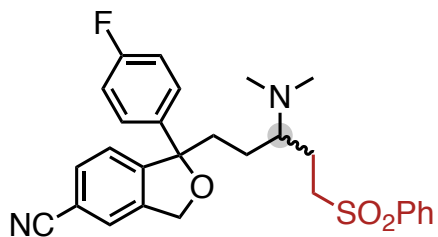

-115.12

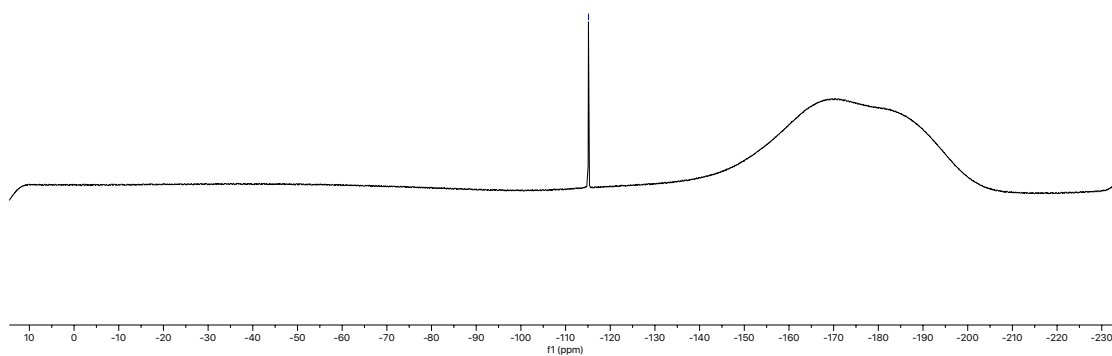

ys-469-1.134.fid  
proton

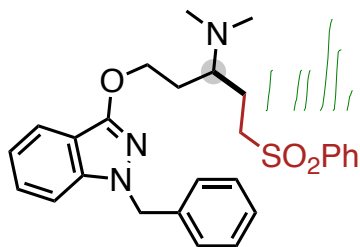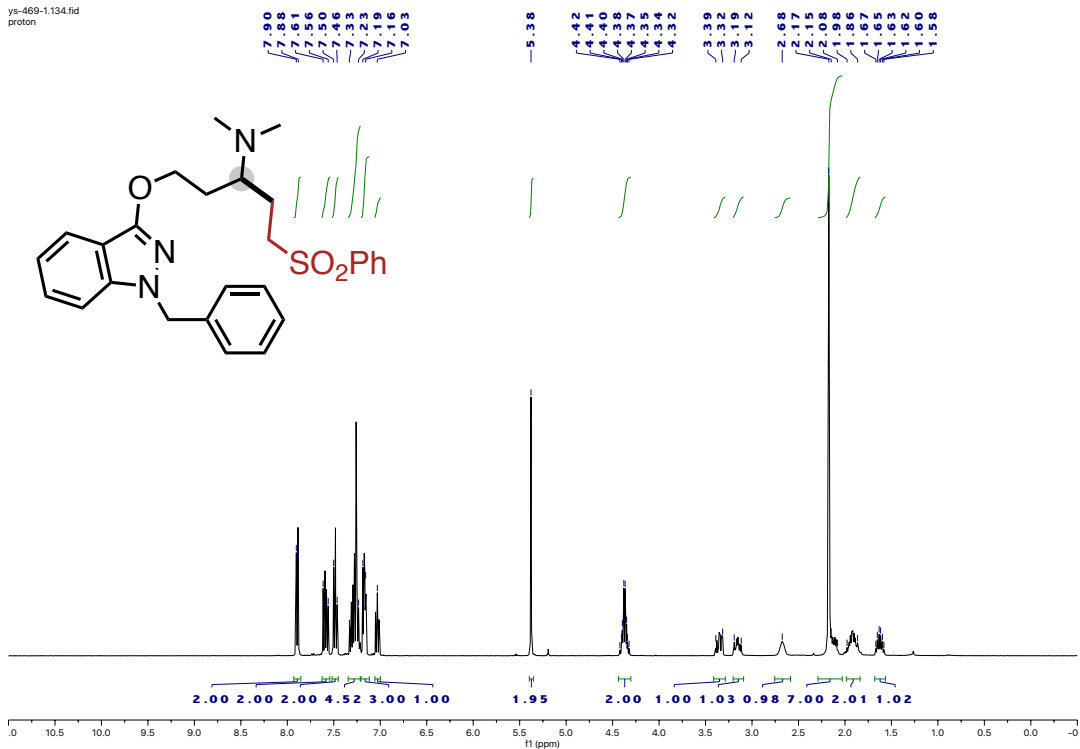

ys-469-1-c13.138.fid

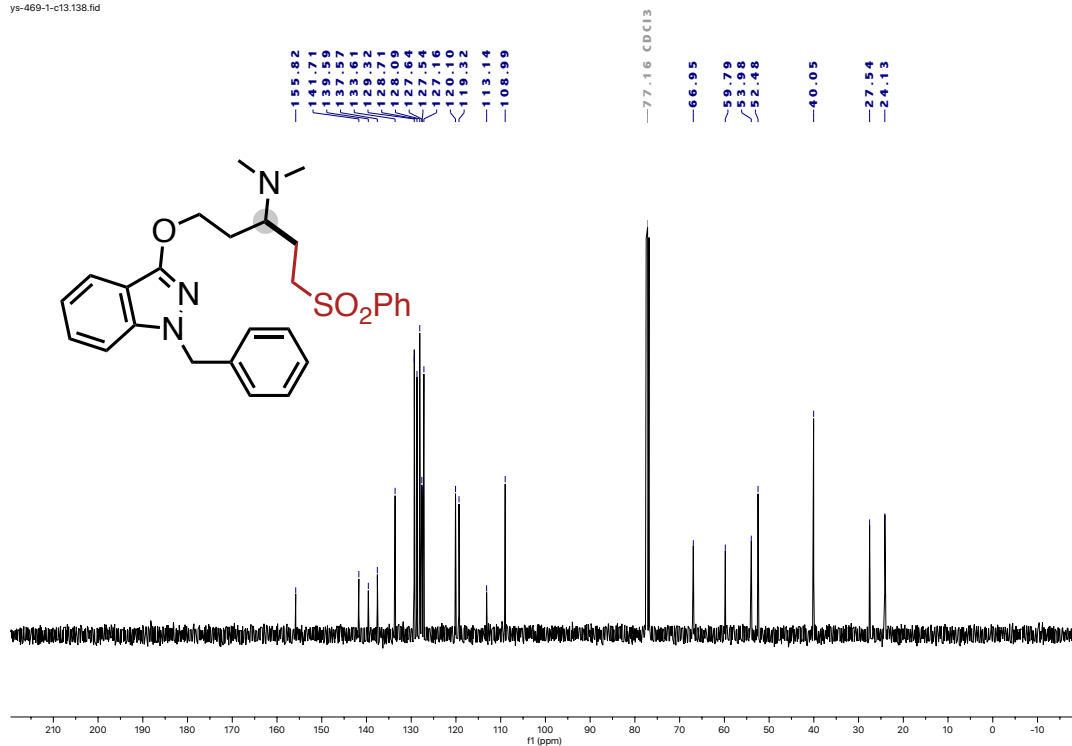

ys-353-pure.169.fid

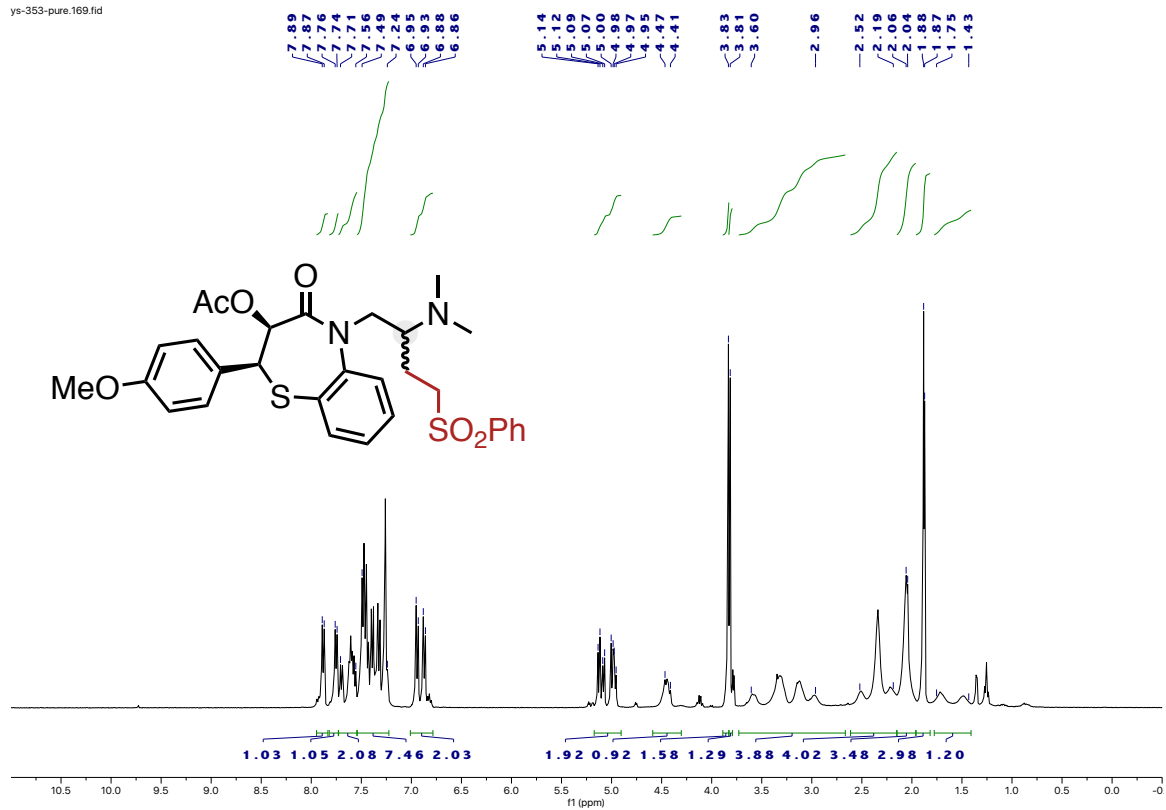

ys-353-pure-c13.42.fid  
Carbon 13

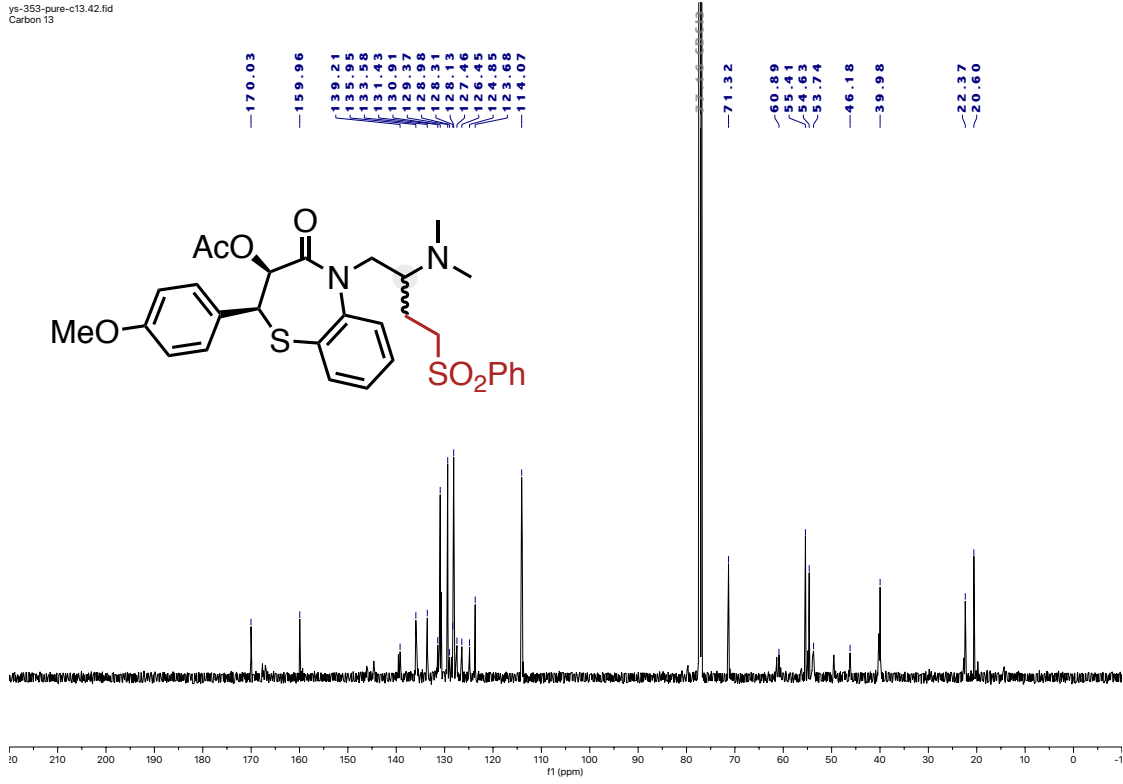

ys-477-1.150.fid  
proton

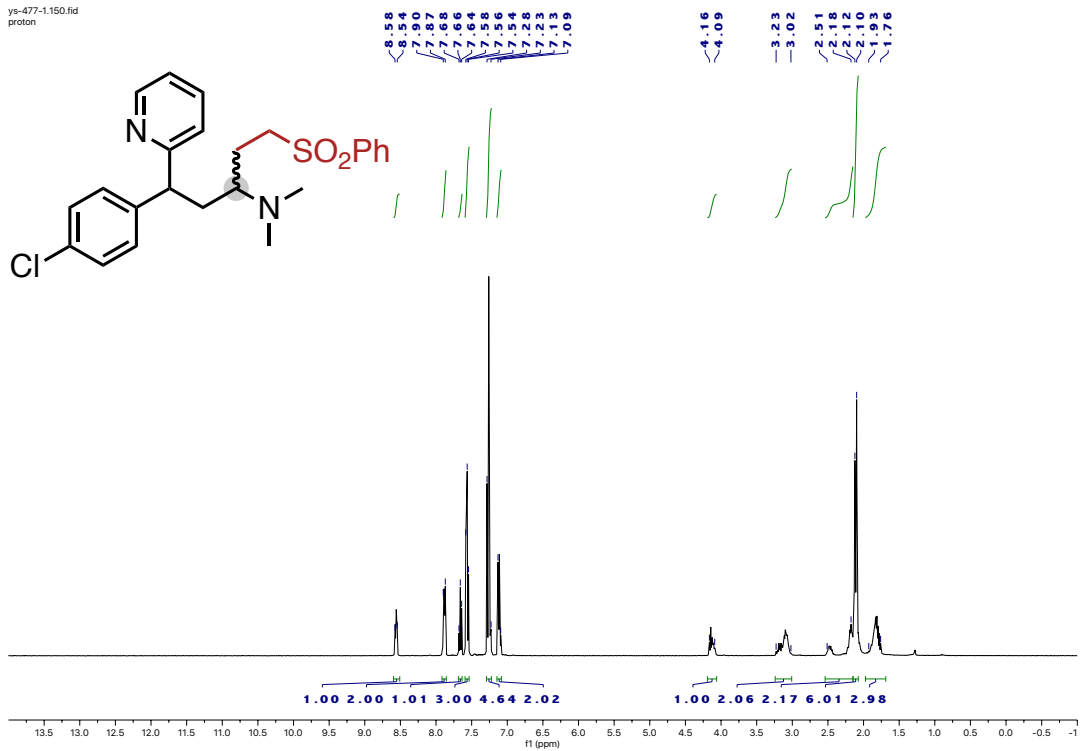

ys-477-1-c13.151.fid

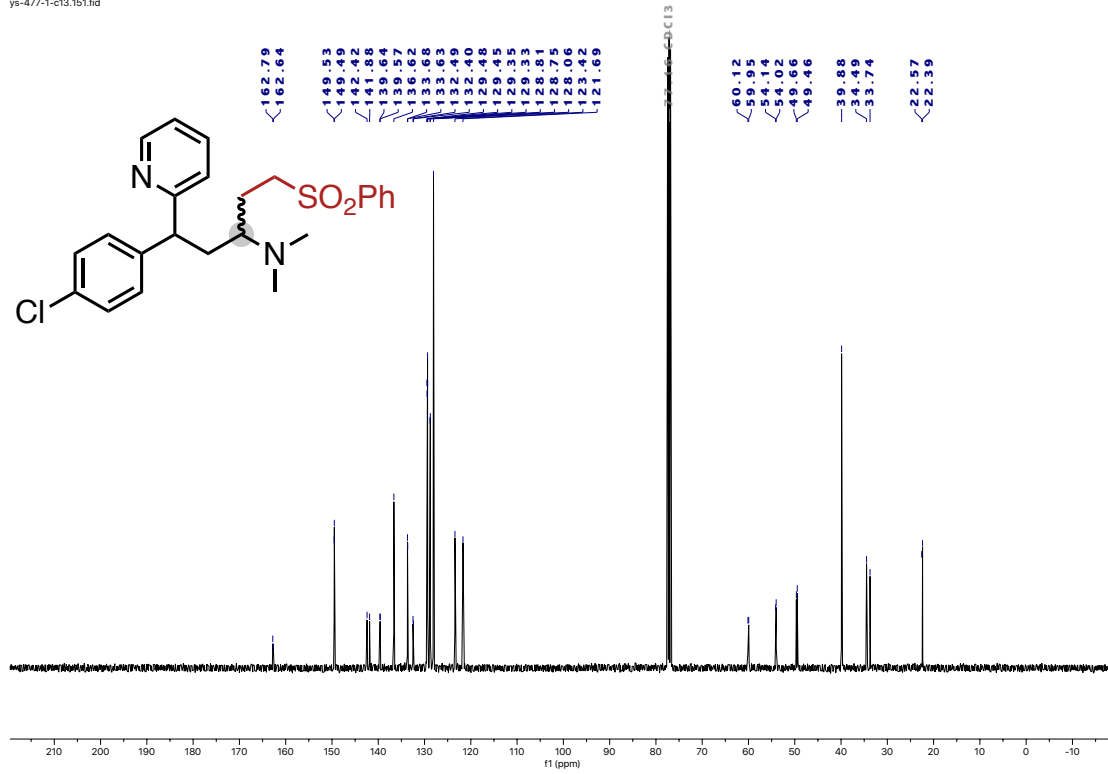

ys-477-2.149.fid  
proton

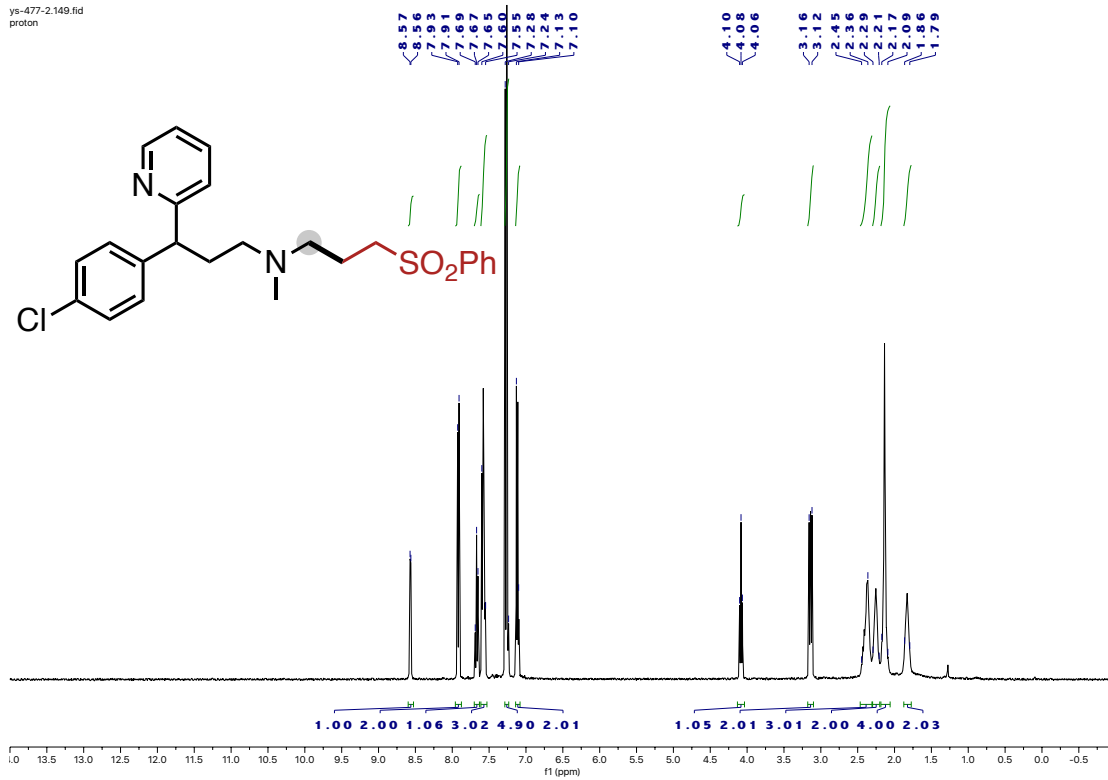

ys-477-2-c13.152.fid

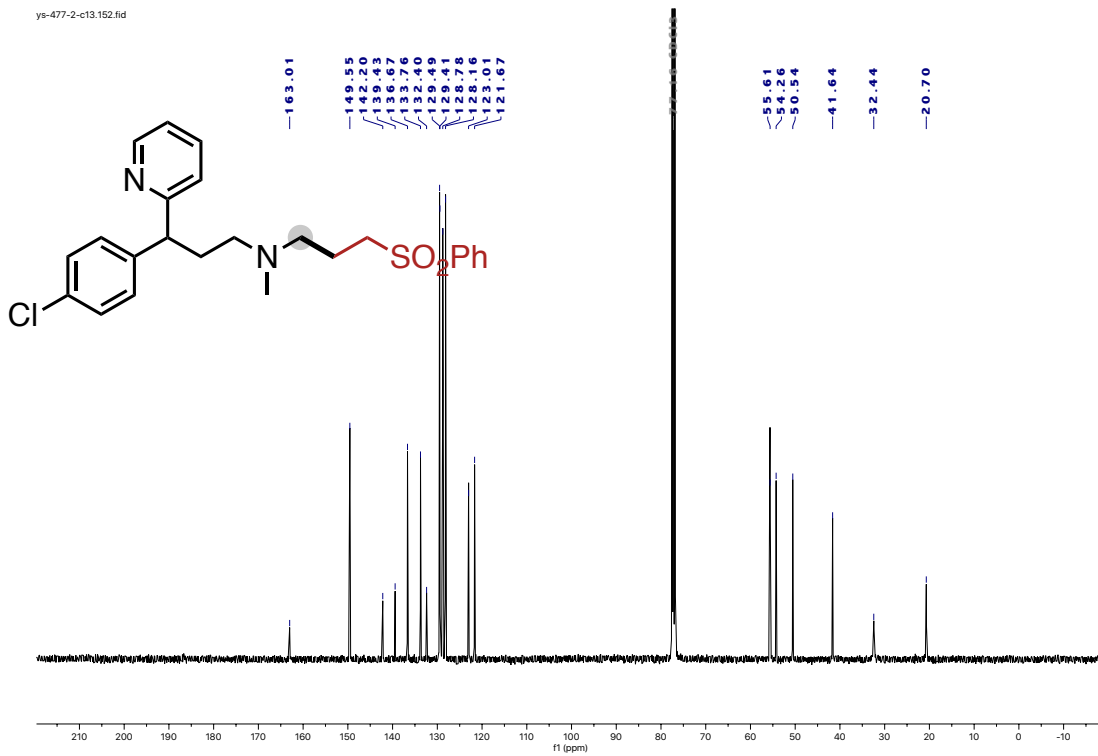

ys-466-a.137.fid  
proton

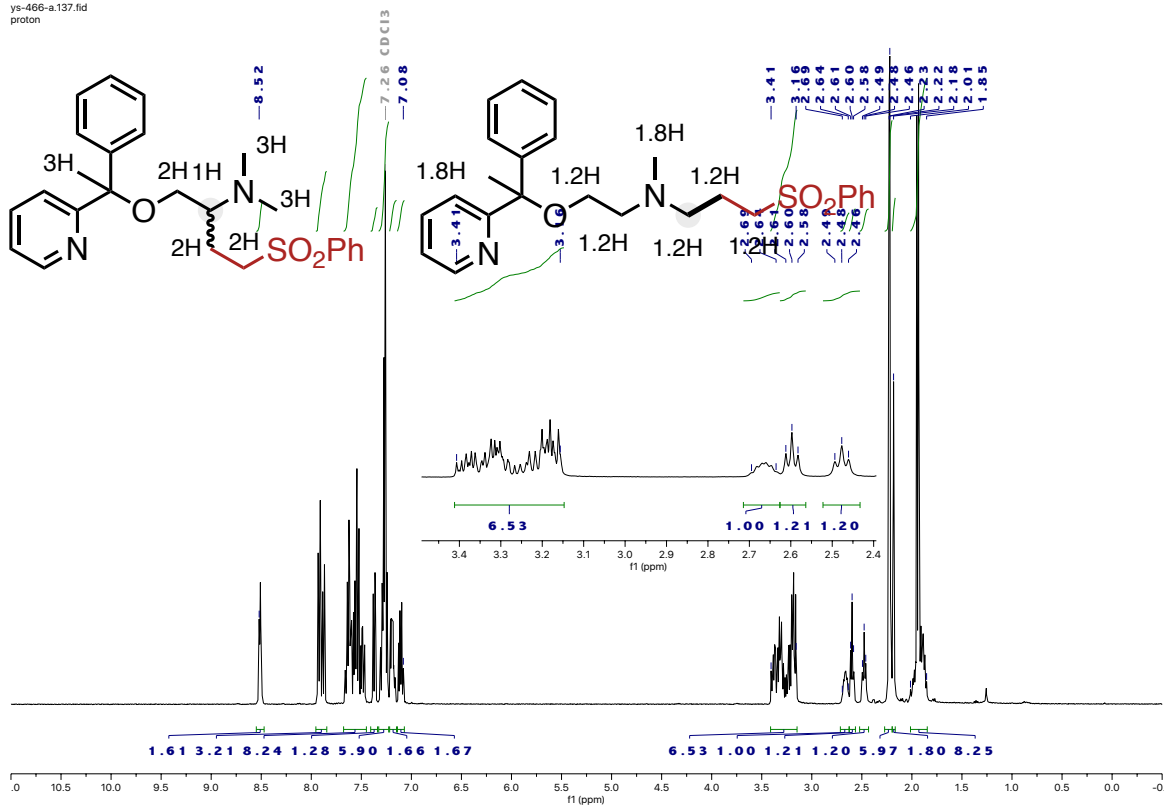

ys-466-a-c13.141.fid

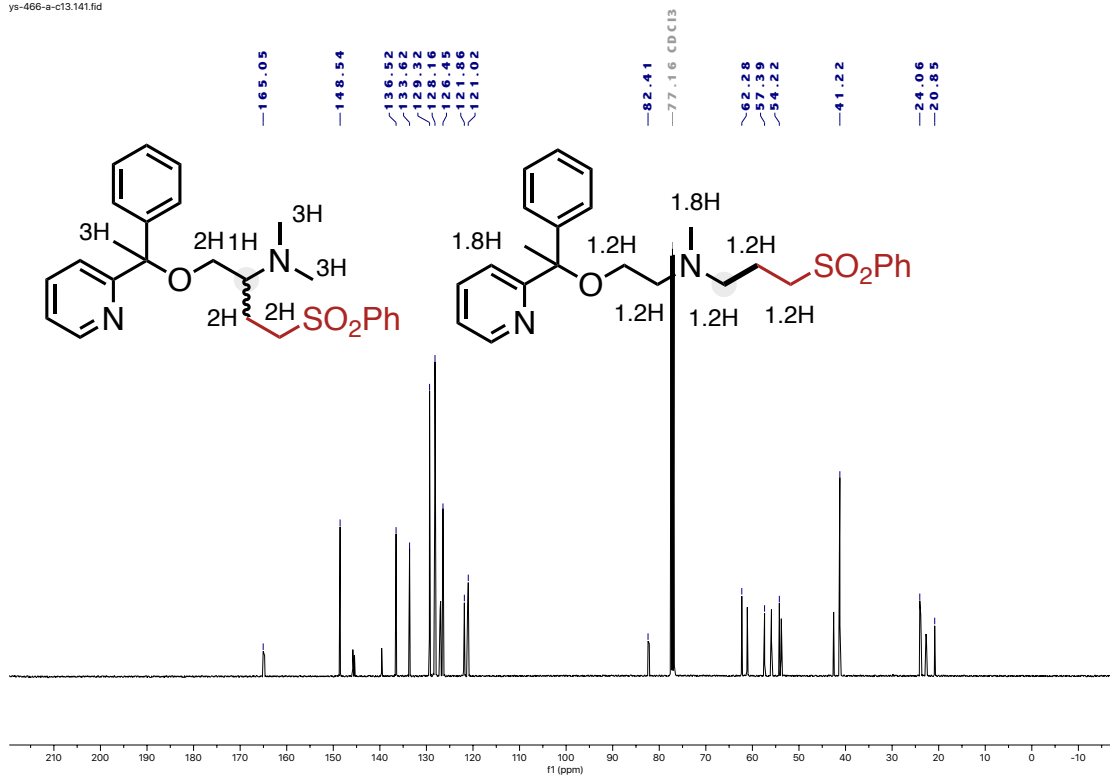

ys-465.126.fid  
proton

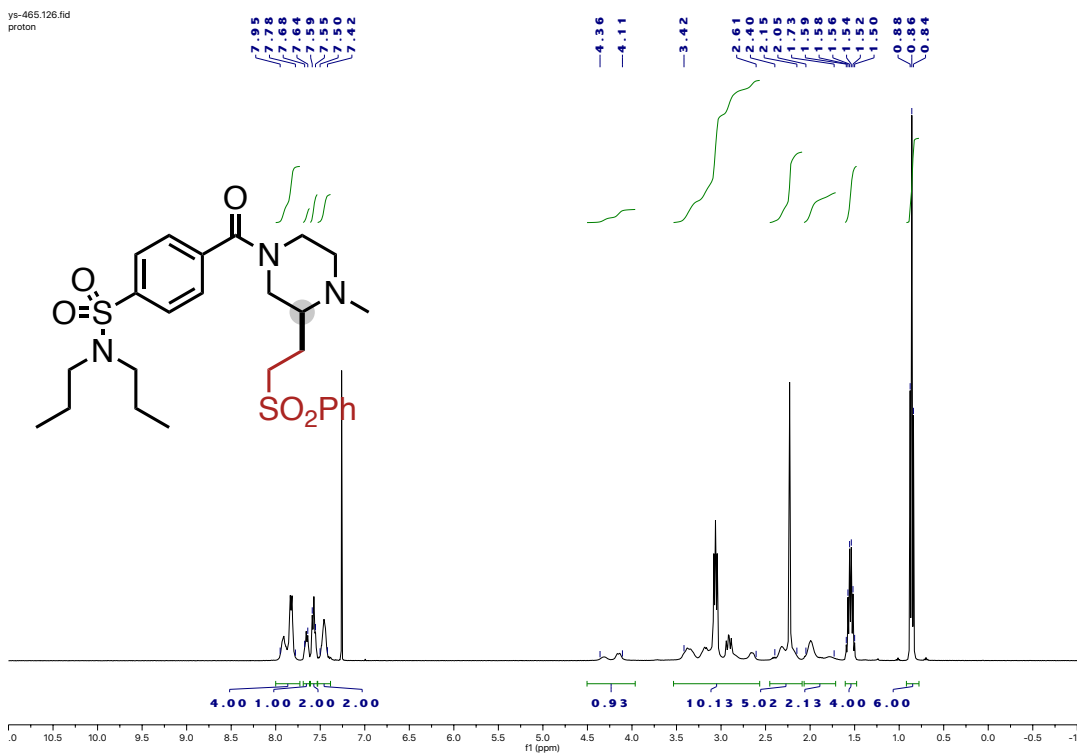

ys-465-c13.131.fid

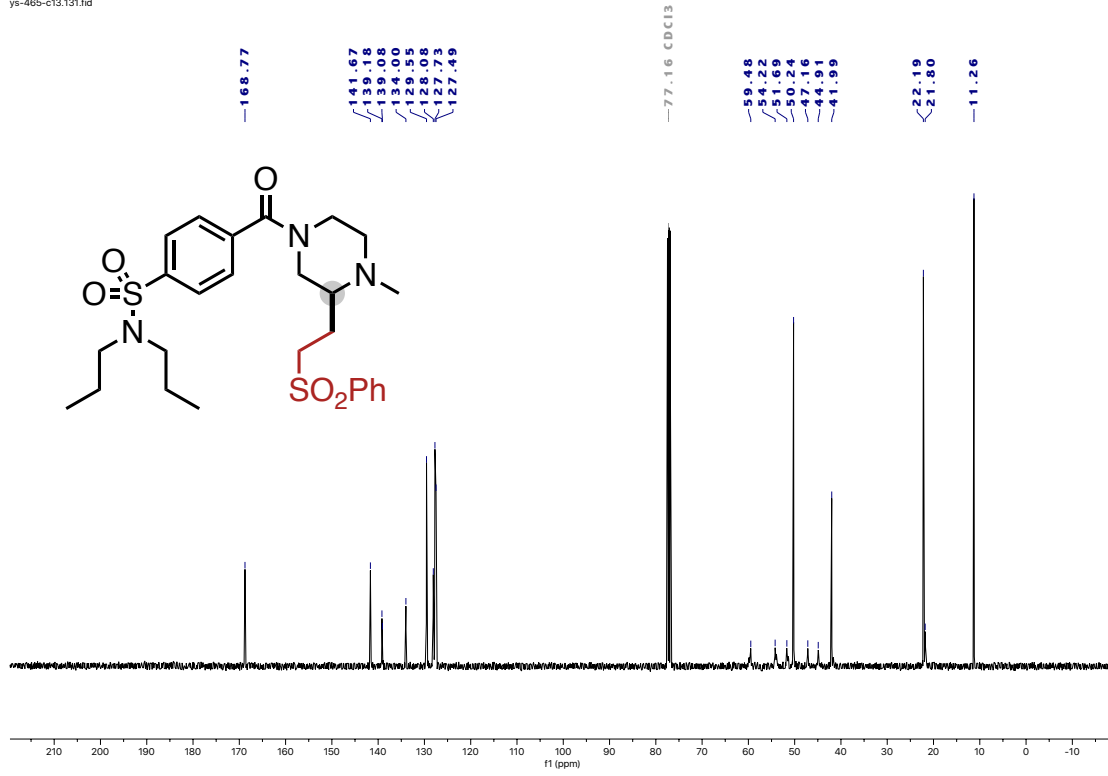

ys-514.239.fid

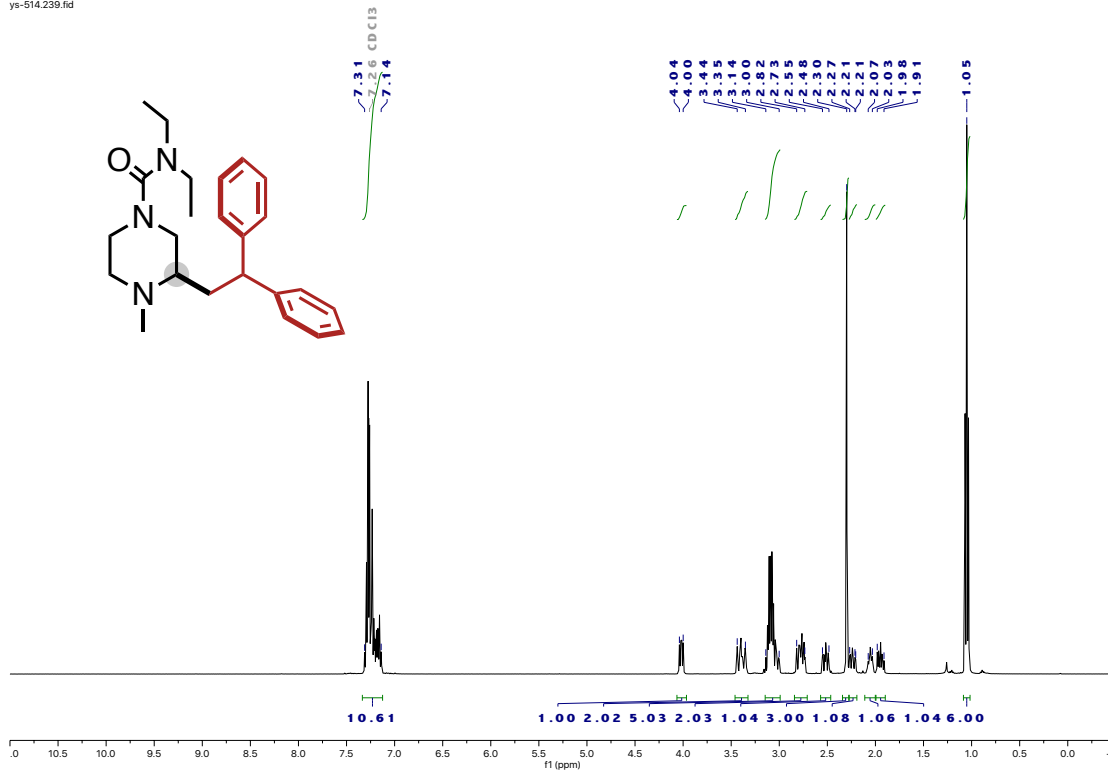

ys-514-c13.241.fid  
Carbon 13

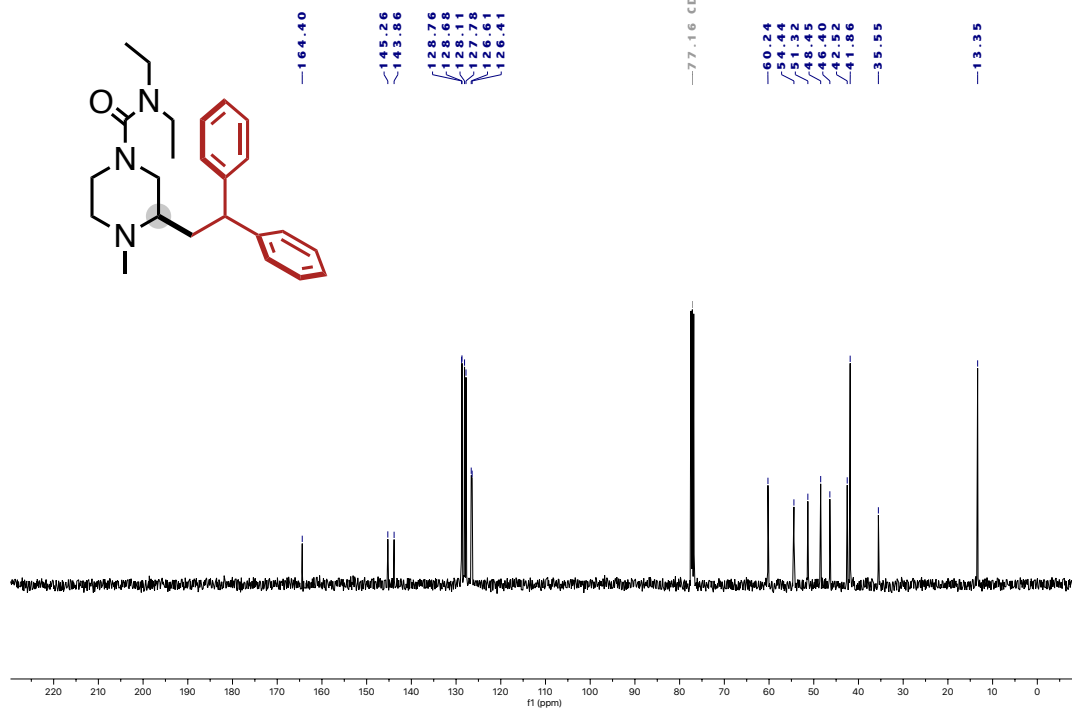

ys-347-2.35.fid

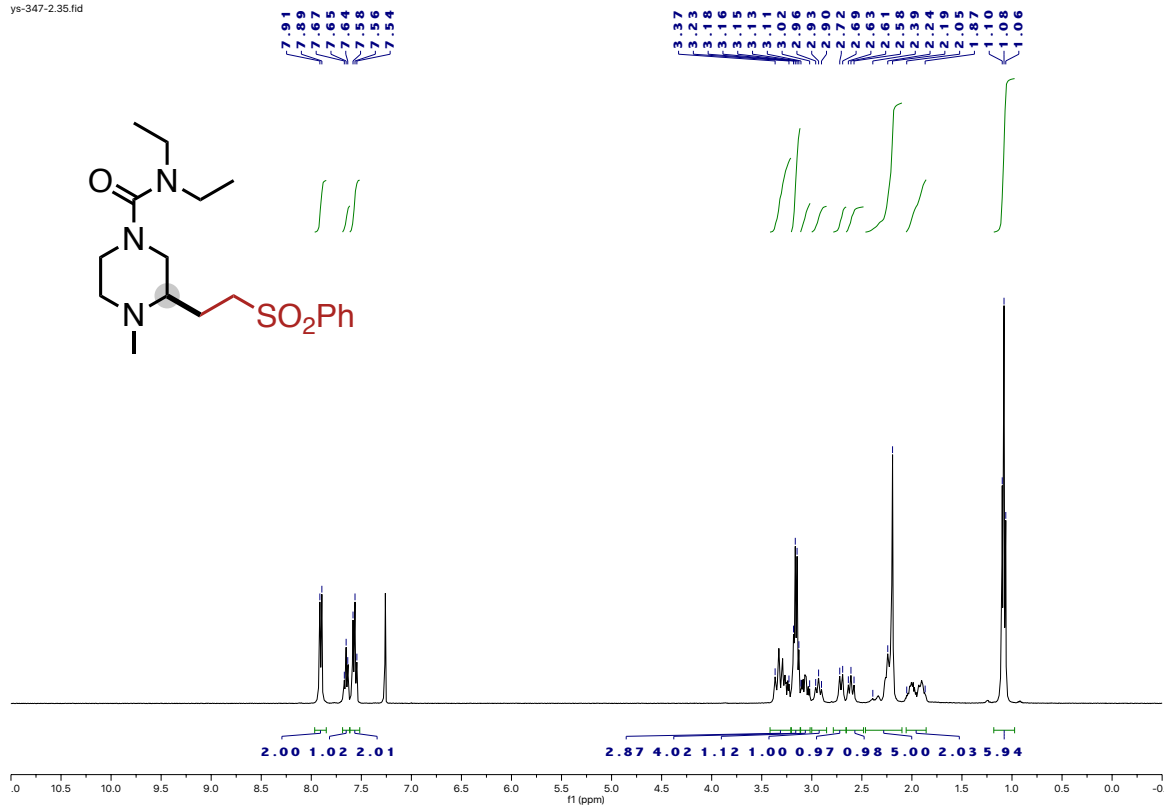



ys-347-2-c13-1.37.fid

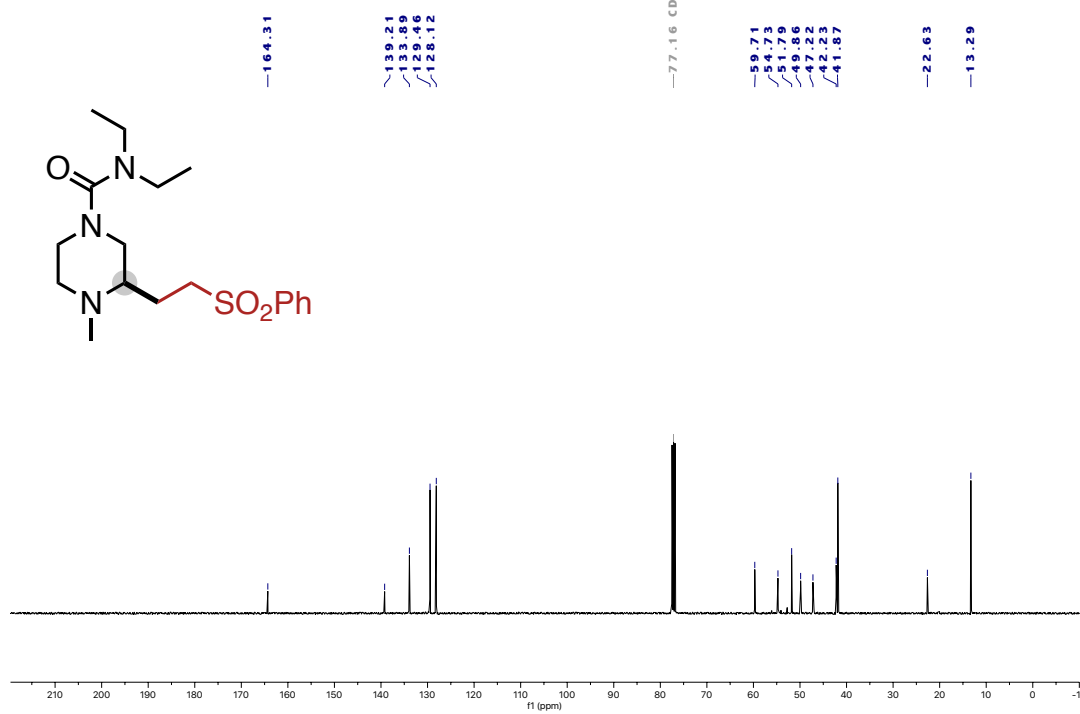

ys-510.240.fid

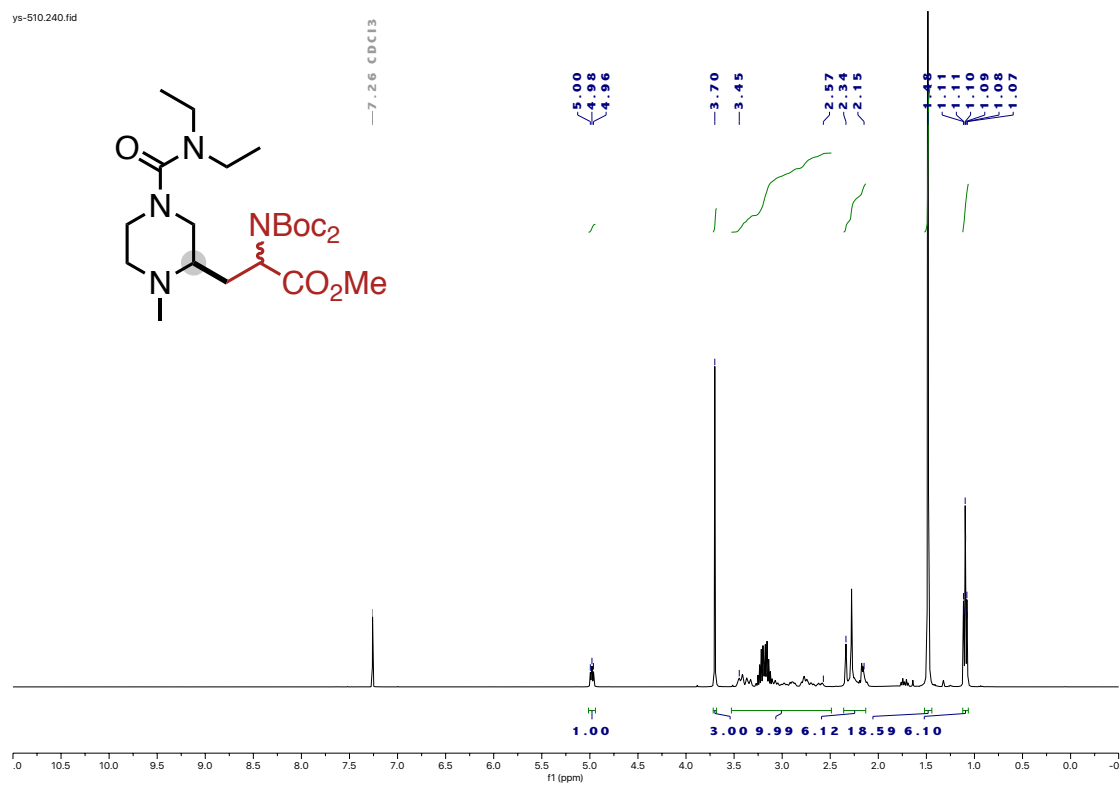

ys-510-c13.242.fid  
carbon 13

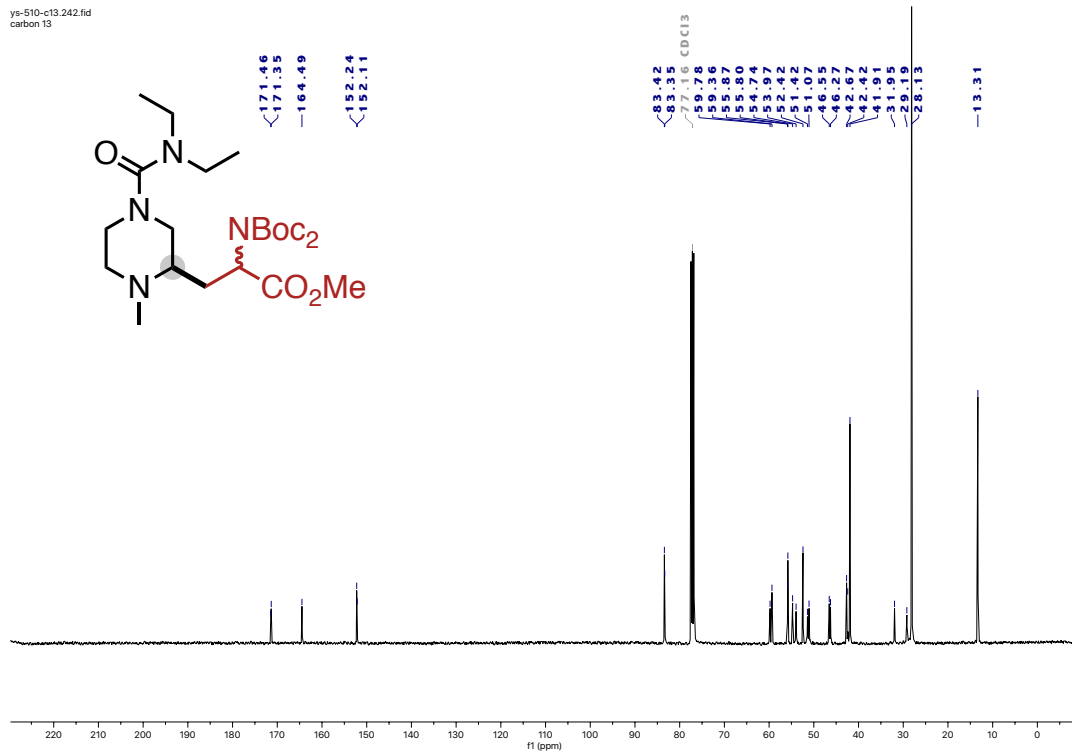

ys-352-pure.170.fid  
carbon 13

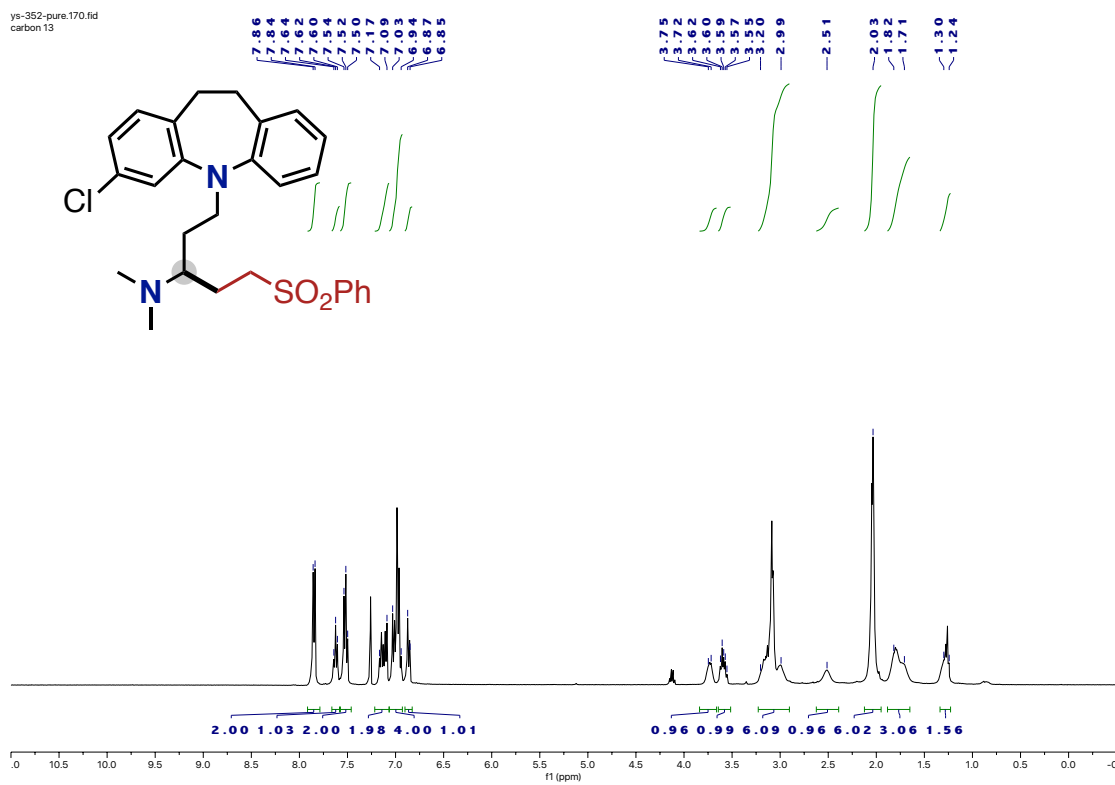

ys-352-pure-c13.171.fid  
Carbon 13

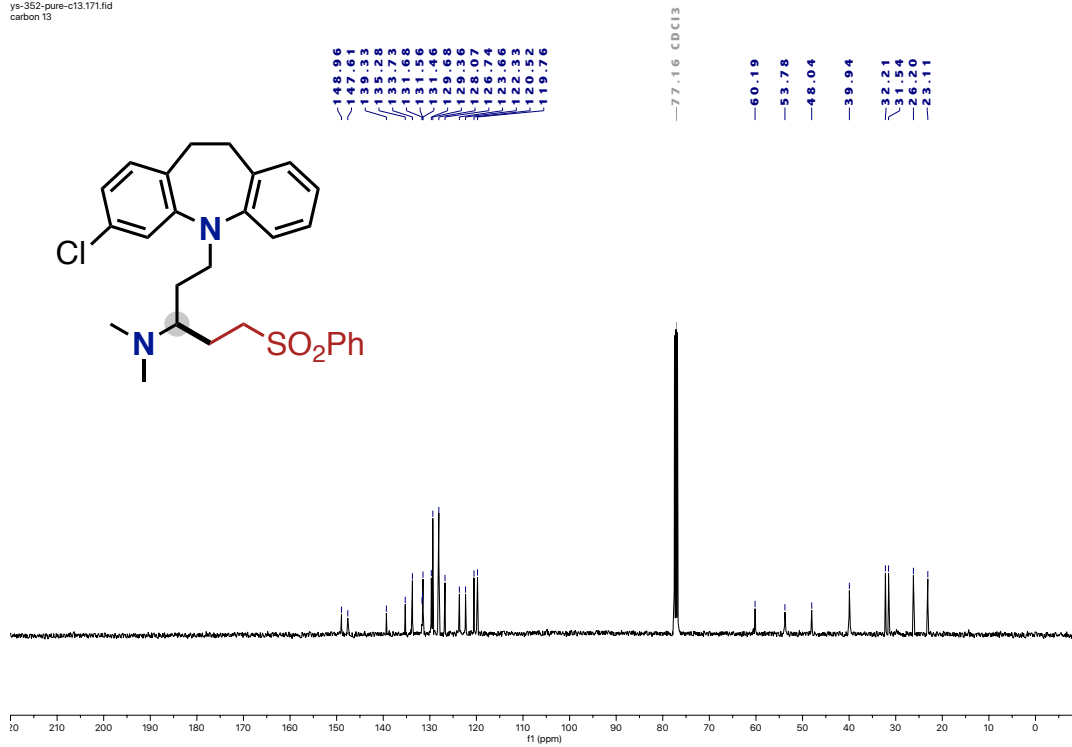

ys-558.279.fid

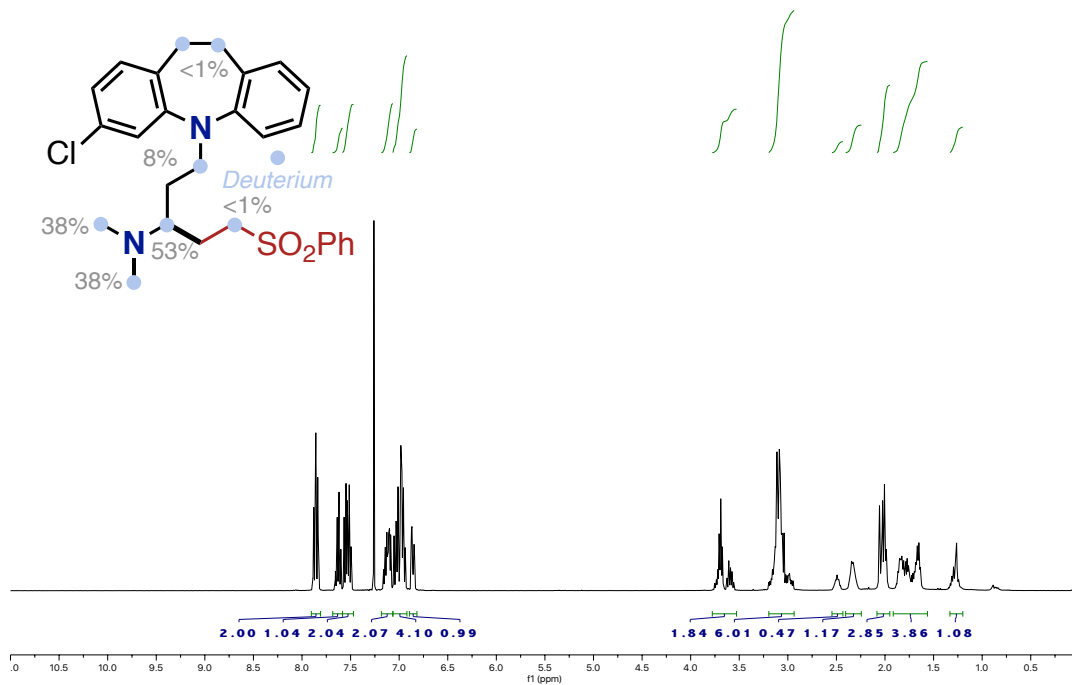

ys-558-sm.280.fid

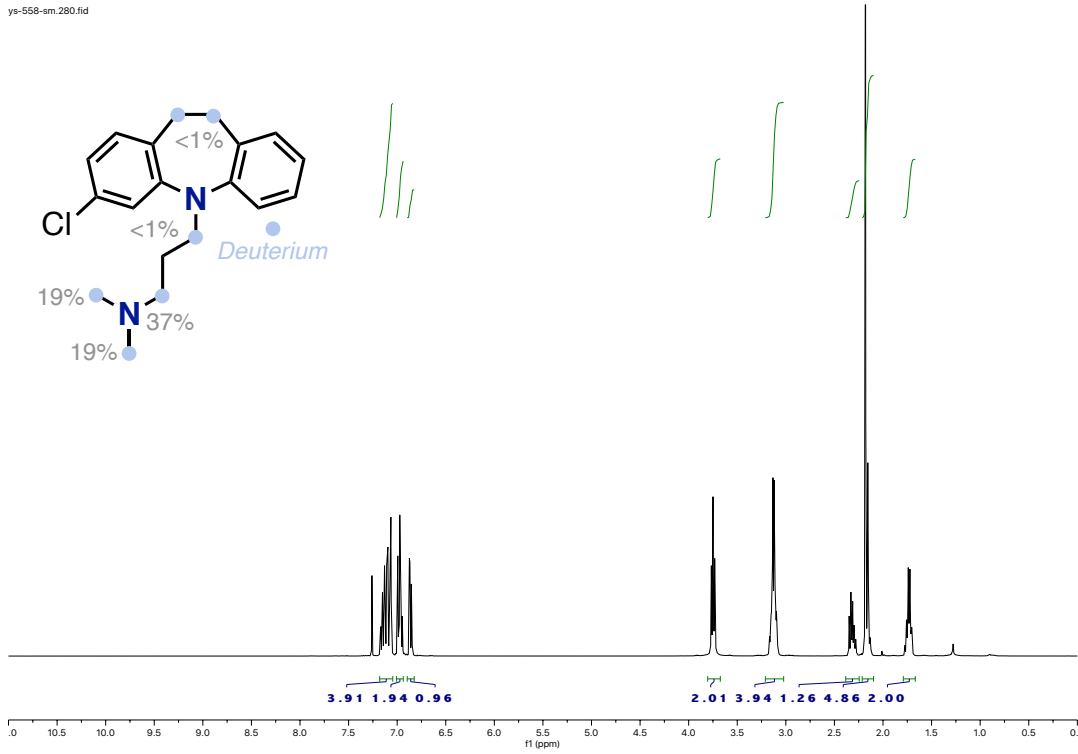

ys-470-1.136.fid  
proton

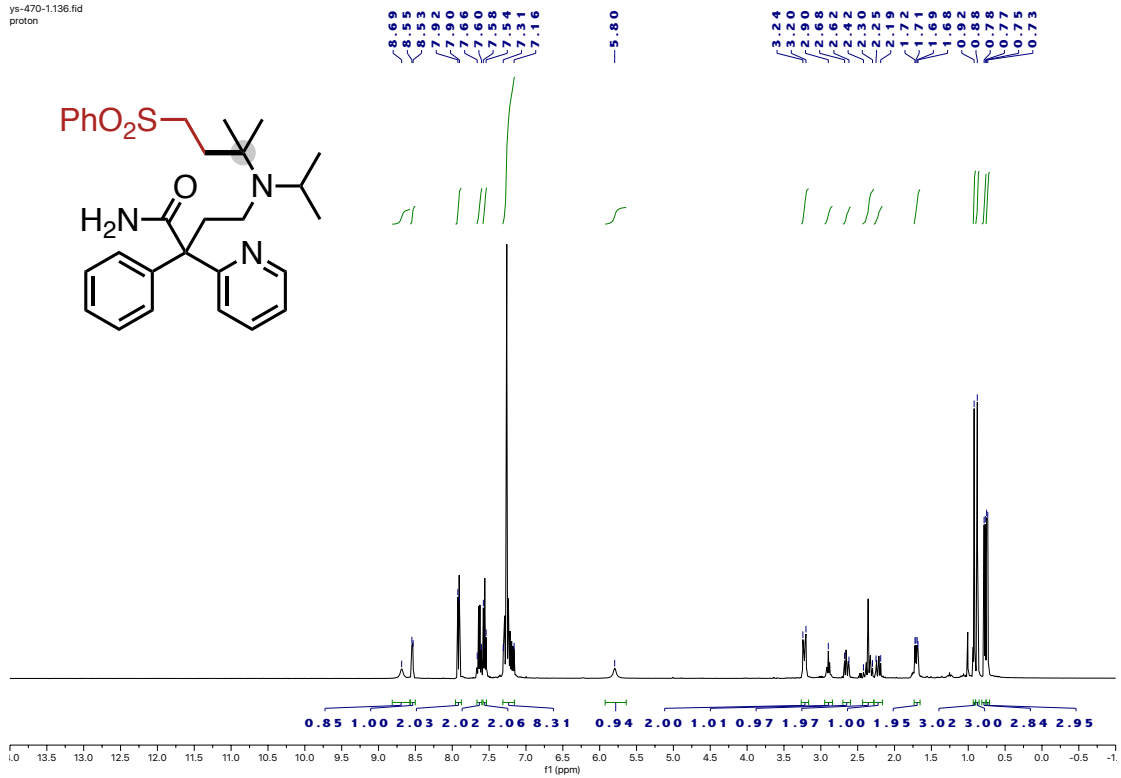

ys-470-1-c13.140.fid

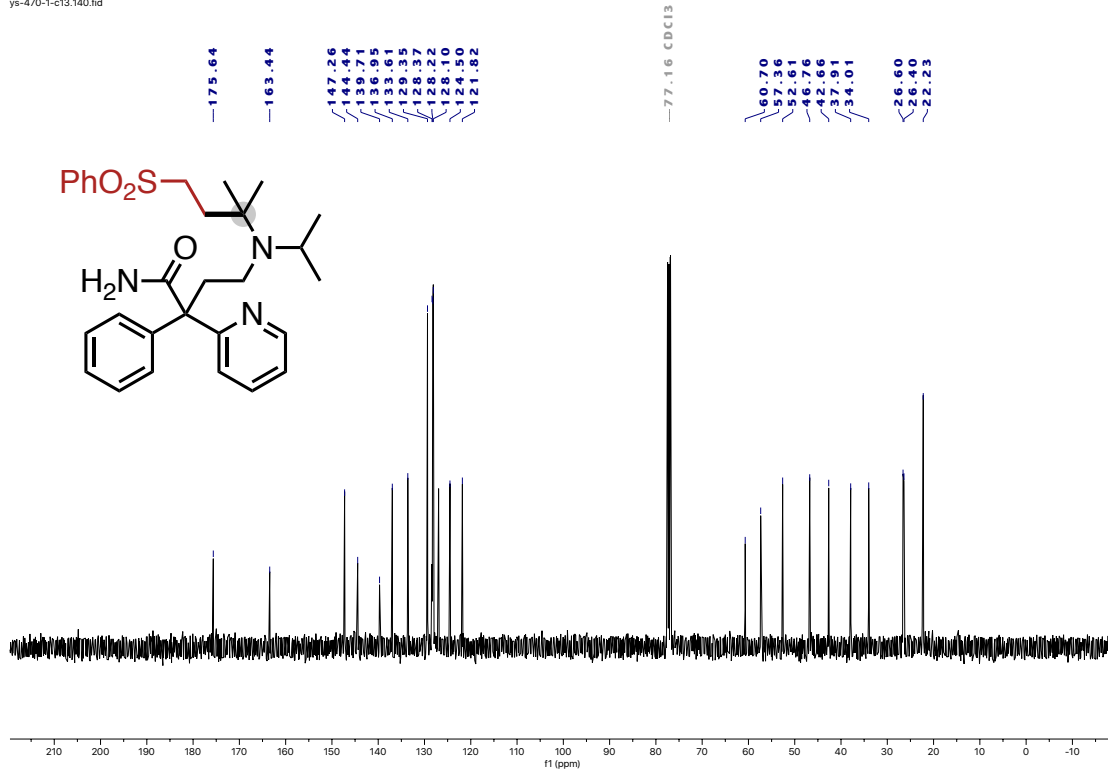

ys-519-1.180.fid  
proton

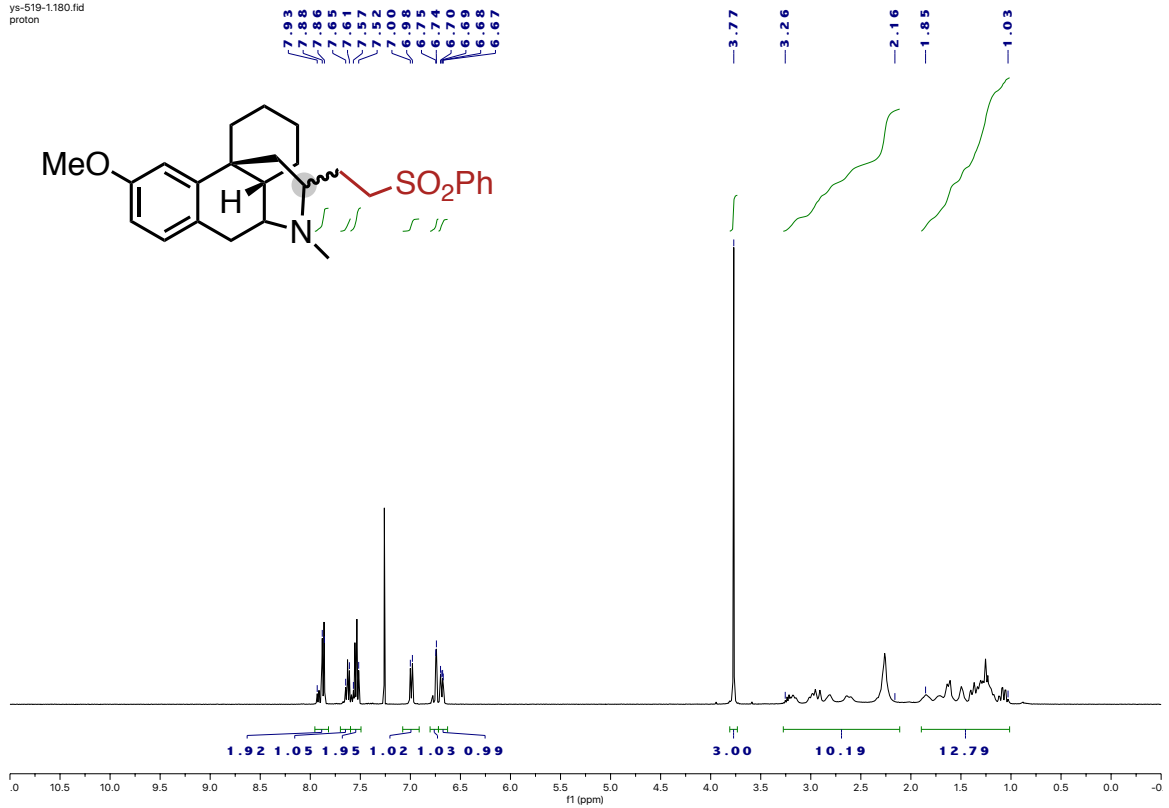

ys-519-1-a-c13.184.fid

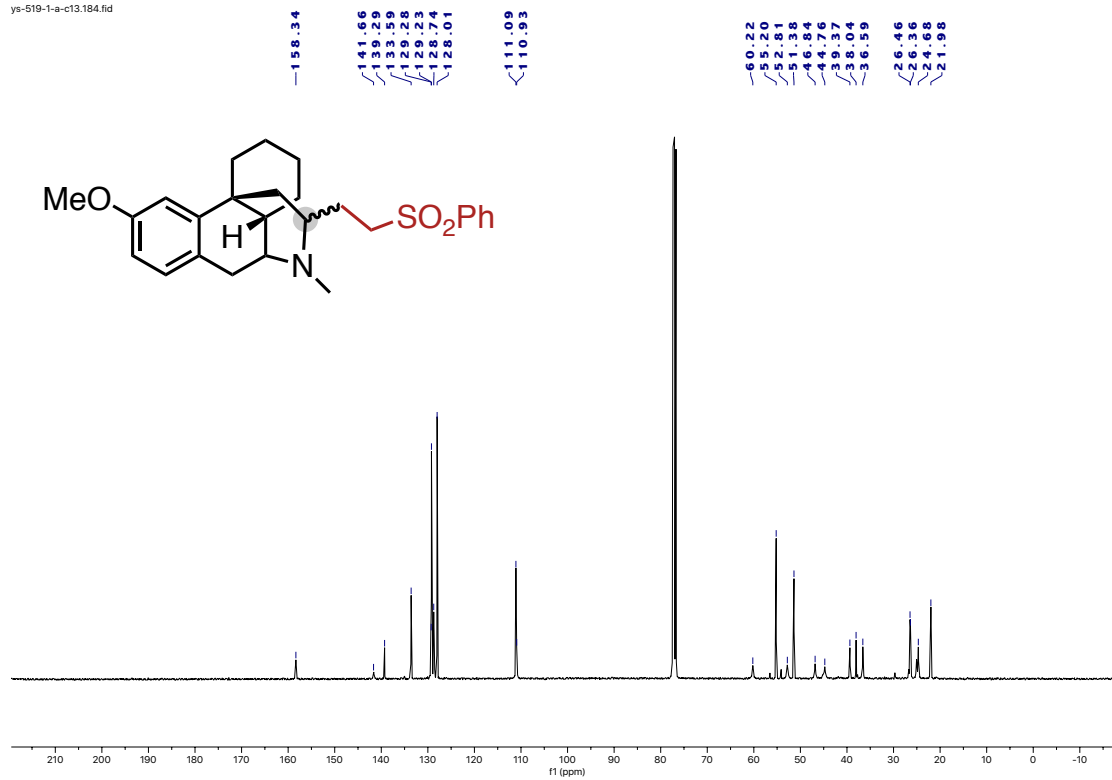

Supplement: NIHMS1778705-supplement-SI.pdf [file NIHMS1778705-supplement-SI.pdf]
